# Supplementary material for: Global quantification exposes abundant low-level off-target activity by base editors
Source: HighWire-hosted journal article supplement (doi:10.1101/gr.275770.121), 2021-10-19
Supplement: Supp_Tables_allver3.xlsx [file Supp_Tables_allver3.xlsx]

## Sheet: Supp. table 1
Table S1: Summary of the studies analyzed
Study			Organism	Data type	Editor type	Hours to sequencing	A2G editors (#)	C2T editors (#)	A2G samples (#)	C2T samples (#)	Control samples (#)	Cell line	Read length	GEO/SRA ID
A	A cytosine deaminase for programmable single base RNA editing	Abudayyeh, O.O. et al.	Human	RNA-seq	RNA	48	3	5	21	45	0	HEK293FT	35bp	PRJNA525232
B	Abundant off target edits from site directed RNA editing can be reduced by nuclear localization of the editing enzyme	Vallecillo−Viejo, I.C. et al.	Human	RNA-seq	RNA	96	4	-	4	-	4	HEK293T	100bp	SRP132451
C	Analysis and minimization of cellular RNA editing by DNA adenine base editors	Holly A. Rees. Et al.	Human	RNA-seq	DNA	48	4	-	12	-	3	HEK293T	150bp	SRP189249
D	CRISPR DNA base editors with reduced RNA off target and self editing activities	Grünewald, J. et al.	Human	RNA-seq	DNA	72	4	3	36	9	7	HEK293T	100bp	GSE129894
E	Cytosine base editors with minimized unguided DNA and RNA off-target events and high on-target activity	Yi Yu et al.	Human	RNA-seq	DNA	64	-	8	-	48	6	HEK293T	150bp	PRJNA595157
F	Efficient and precise editing of endogenous transcripts with SNAP tagged ADARs	Vogel, P. et al.	Human	RNA-seq	RNA	48	4	-	12	-	2	HEK293T	101bp	GSE112787
G	In vivo RNA editing of point mutations via RNA guided adenosine deaminases	Katrekar, D. et al.	Human	RNA-seq	RNA	60	22	-	22	-	4	HEK293T	100bp	GSE123905
H	Off target RNA mutation induced by DNA base editing and its elimination by mutagenesis	Zhou, C. et al.	Human	RNA-seq	DNA	72	7	8	21	25	6	HEK293T	150bp	PRJNA528149 and PRJNA528561
I	Transcriptome wide off target RNA editing induced by CRISPR guided DNA base editors	Grünewald, J. et al.	Human	RNA-seq	DNA	72	-	4	-	18	1	HEK293T	76bp	PRJNA497753
E	Cytosine base editors with minimized unguided DNA and RNA off-target events and high on-target activity	Yi Yu et al.	Human	WGS	DNA	64	-	8	-	321	60	HEK293T	150bp	PRJNA595157
J	Cytosine base editor generates substantial off target single nucleotide variants in mouse embryos	Zuo, E. et al.	Mouse	WGS	DNA		1	1	8	12	24	-	150bp	SRP119022
K	Cytosine base editor 4 but not adenine base editor generates off-target mutations in mouse embryos	Lee HK. et al.	Mouse	WGS	DNA		1	1	13	9	22	-	150bp	PRJNA555149
L	Evaluation and minimization of Cas9-independent off-target DNA editing by cytosine base editors	Doman, J. et al.	Human	WGS	DNA	72	-	2	-	16	8	HEK293T	150bp	PRJNA553240

## Sheet: Supp. table 2
Table S2: Data presented in Fig. 2		Editing index values per RNA-seq sample
A-to-G								C-to-T
Run	Name	Editing type	AEI	Dataset				Run	Name	Editing type	AEI	Dataset
SRR10523742	REPAIRv1(X85W)	A to G	0.739798	A				SRR10523742	REPAIRv1(X85W)	C to T	0.0455633	A
SRR10523750	RESCUE+S375A	A to G	0.0986103	A				SRR10523750	RESCUE+S375A	C to T	0.0707747	A
SRR10523707	RESCUE+S375C	A to G	0.17281	A				SRR10523707	RESCUE+S375C	C to T	0.0764433	A
SRR10523739	RESCUE+S375N	A to G	0.38028	A				SRR10523739	RESCUE+S375N	C to T	0.0804287	A
SRR10523735	RESCUE	A to G	0.634547	A				SRR10523735	RESCUE	C to T	0.119894	A
SRR10523729	RESCUE+S375C	A to G	0.149635	A				SRR10523729	RESCUE+S375C	C to T	0.0731143	A
SRR10523732	RESCUE+N473I	A to G	0.386022	A				SRR10523732	RESCUE+N473I	C to T	0.0757594	A
SRR10523709	REPAIRv1(N81S)	A to G	0.267637	A				SRR10523709	REPAIRv1(N81S)	C to T	0.045353	A
SRR10523726	RESCUE	A to G	0.552565	A				SRR10523726	RESCUE	C to T	0.11072	A
SRR10523723	REPAIRv1(X85W)	A to G	0.865147	A				SRR10523723	REPAIRv1(X85W)	C to T	0.0457074	A
SRR10523714	RESCUE+N473I	A to G	0.360206	A				SRR10523714	RESCUE+N473I	C to T	0.0722963	A
SRR10523734	REPAIRv1(X85W)	A to G	0.645621	A				SRR10523734	REPAIRv1(X85W)	C to T	0.0456099	A
SRR10523762	REPAIRv1(N81S)	A to G	0.2206	A				SRR10523762	REPAIRv1(N81S)	C to T	0.0461442	A
SRR10523740	REPAIRv1(N81S)	A to G	0.265493	A				SRR10523740	REPAIRv1(N81S)	C to T	0.0457763	A
SRR10523756	REPAIRv1(X85W)	A to G	0.829654	A				SRR10523756	REPAIRv1(X85W)	C to T	0.0461817	A
SRR10523711	REPAIRv2	A to G	0.0662786	A				SRR10523711	REPAIRv2	C to T	0.0463141	A
SRR10523757	RESCUE	A to G	0.68189	A				SRR10523757	RESCUE	C to T	0.125288	A
SRR10523708	RESCUE+S375N	A to G	0.388128	A				SRR10523708	RESCUE+S375N	C to T	0.0803263	A
SRR10523705	RESCUE+N473I	A to G	0.338938	A				SRR10523705	RESCUE+N473I	C to T	0.0716448	A
SRR10523747	RESCUE+S375C	A to G	0.179961	A				SRR10523747	RESCUE+S375C	C to T	0.0801931	A
SRR10523720	REPAIRv1(N81S)	A to G	0.258558	A				SRR10523720	REPAIRv1(N81S)	C to T	0.0466319	A
SRR10523716	RESCUE+N473I	A to G	0.344658	A				SRR10523716	RESCUE+N473I	C to T	0.0710316	A
SRR10523703	REPAIRv2	A to G	0.065528	A				SRR10523703	REPAIRv2	C to T	0.0450951	A
SRR10523765	RESCUE+S375N	A to G	0.40662	A				SRR10523765	RESCUE+S375N	C to T	0.0824092	A
SRR10523731	REPAIRv1(N81S)	A to G	0.192901	A				SRR10523731	REPAIRv1(N81S)	C to T	0.0450888	A
SRR10523754	RESCUE+S375C	A to G	0.185971	A				SRR10523754	RESCUE+S375C	C to T	0.079941	A
SRR10523715	RESCUE	A to G	0.65854	A				SRR10523715	RESCUE	C to T	0.122737	A
SRR10523701	RESCUE+S375N	A to G	0.412734	A				SRR10523701	RESCUE+S375N	C to T	0.0829612	A
SRR10523746	RESCUE+S375A	A to G	0.0991191	A				SRR10523746	RESCUE+S375A	C to T	0.0764313	A
SRR10523704	RESCUE	A to G	0.6672	A				SRR10523704	RESCUE	C to T	0.123104	A
SRR10523724	RESCUE	A to G	0.684416	A				SRR10523724	RESCUE	C to T	0.125677	A
SRR10523764	RESCUE+S375C	A to G	0.175844	A				SRR10523764	RESCUE+S375C	C to T	0.0767816	A
SRR10523760	RESCUE+S375C	A to G	0.178894	A				SRR10523760	RESCUE+S375C	C to T	0.0791334	A
SRR10523749	REPAIRv1(N81S)	A to G	0.250912	A				SRR10523749	REPAIRv1(N81S)	C to T	0.0457886	A
SRR10523717	RESCUE+S375A	A to G	0.100813	A				SRR10523717	RESCUE+S375A	C to T	0.0737036	A
SRR10523761	RESCUE+S375N	A to G	0.376354	A				SRR10523761	RESCUE+S375N	C to T	0.0811069	A
SRR10523733	REPAIRv2	A to G	0.0576162	A				SRR10523733	REPAIRv2	C to T	0.0450674	A
SRR10523712	REPAIRv1(X85W)	A to G	0.809678	A				SRR10523712	REPAIRv1(X85W)	C to T	0.046006	A
SRR10523741	REPAIRv2	A to G	0.0643178	A				SRR10523741	REPAIRv2	C to T	0.0454467	A
SRR10523743	RESCUE+S375A	A to G	0.102021	A				SRR10523743	RESCUE+S375A	C to T	0.0759258	A
SRR10523722	REPAIRv2	A to G	0.0641022	A				SRR10523722	REPAIRv2	C to T	0.0460453	A
SRR10523713	RESCUE	A to G	0.648785	A				SRR10523713	RESCUE	C to T	0.121502	A
SRR10523728	RESCUE+S375A	A to G	0.0886997	A				SRR10523728	RESCUE+S375A	C to T	0.0696315	A
SRR10523721	RESCUE	A to G	0.678956	A				SRR10523721	RESCUE	C to T	0.127978	A
SRR10523759	RESCUE+S375A	A to G	0.0967076	A				SRR10523759	RESCUE+S375A	C to T	0.0744399	A
SRR10523727	RESCUE+N473I	A to G	0.29006	A				SRR10523727	RESCUE+N473I	C to T	0.0681248	A
SRR10523725	RESCUE+N473I	A to G	0.361133	A				SRR10523725	RESCUE+N473I	C to T	0.0723393	A
SRR10523737	RESCUE+S375A	A to G	0.107813	A				SRR10523737	RESCUE+S375A	C to T	0.0731116	A
SRR10523718	RESCUE+S375C	A to G	0.176324	A				SRR10523718	RESCUE+S375C	C to T	0.0779119	A
SRR10523758	RESCUE+N473I	A to G	0.345326	A				SRR10523758	RESCUE+N473I	C to T	0.0728626	A
SRR10523763	RESCUE+S375A	A to G	0.114152	A				SRR10523763	RESCUE+S375A	C to T	0.0753583	A
SRR10523736	RESCUE+N473I	A to G	0.290301	A				SRR10523736	RESCUE+N473I	C to T	0.0671202	A
SRR10523702	REPAIRv1(N81S)	A to G	0.290646	A				SRR10523702	REPAIRv1(N81S)	C to T	0.0463081	A
SRR10523744	RESCUE	A to G	0.707441	A				SRR10523744	RESCUE	C to T	0.130044	A
SRR10523745	RESCUE+N473I	A to G	0.387262	A				SRR10523745	RESCUE+N473I	C to T	0.077749	A
SRR10523766	REPAIRv1(N81S)	A to G	0.25051	A				SRR10523766	REPAIRv1(N81S)	C to T	0.0450201	A
SRR10523738	RESCUE+S375C	A to G	0.168429	A				SRR10523738	RESCUE+S375C	C to T	0.0762484	A
SRR10523730	RESCUE+S375N	A to G	0.346061	A				SRR10523730	RESCUE+S375N	C to T	0.0768331	A
SRR10523710	REPAIRv1(X85W)	A to G	0.793304	A				SRR10523710	REPAIRv1(X85W)	C to T	0.0460312	A
SRR10523706	RESCUE+S375A	A to G	0.0956673	A				SRR10523706	RESCUE+S375A	C to T	0.0724164	A
SRR10523753	REPAIRv1(N81S)	A to G	0.266569	A				SRR10523753	REPAIRv1(N81S)	C to T	0.0458309	A
SRR10523719	RESCUE+S375N	A to G	0.403376	A				SRR10523719	RESCUE+S375N	C to T	0.082945	A
SRR10523755	REPAIRv2	A to G	0.0655481	A				SRR10523755	REPAIRv2	C to T	0.0456264	A
SRR10523752	RESCUE+S375N	A to G	0.377346	A				SRR10523752	RESCUE+S375N	C to T	0.0799893	A
SRR10523748	RESCUE+S375N	A to G	0.41455	A				SRR10523748	RESCUE+S375N	C to T	0.0849067	A
SRR10523751	RESCUE+S375C	A to G	0.172108	A				SRR10523751	RESCUE+S375C	C to T	0.0757391	A
SRR6686542	2BoxB-4LN-DD E488Q NLS	A to G	0.474948	B				SRR8910101	hA3A-BE3	C to T	0.929861	D
SRR6686543	2BoxB-No enzyme	A to G	0.0195618	B				SRR8910103	hAID-BE3	C to T	0.0434908	D
SRR6686539	2BoxB-4LN-DD	A to G	0.374852	B				SRR8909015	GFP	C to T	0.0295534	D
SRR6686538	No guide-No enzyme	A to G	0.0219264	B				SRR8910098	eA3A-BE3	C to T	0.0426331	D
SRR6686537	2BoxB-4LN-DD E488Q	A to G	0.930249	B				SRR8910095	hAID-BE3	C to T	0.0409345	D
SRR6686540	No guide-4LN-DD NLS	A to G	0.0199888	B				SRR8910093	hA3A-BE3	C to T	0.864204	D
SRR6686536	2BoxB-4LN-DD NLS	A to G	0.165155	B				SRR8910102	eA3A-BE3	C to T	0.0438735	D
SRR6686541	No guide-4LN-DD E488Q NLS	A to G	0.204832	B				SRR8910099	hAID-BE3	C to T	0.0410781	D
SRR8979759	ABEmax	A to G	0.46947	C				SRR8909009	GFP	C to T	0.027979	D
SRR8979754	ABEmax	A to G	0.444084	C				SRR8910104	GFP	C to T	0.0363945	D
SRR8979751	ABEmax	A to G	0.424908	C				SRR8910097	hA3A-BE3	C to T	0.855568	D
SRR8979756	ABEmaxAW	A to G	0.247779	C				SRR8909021	GFP	C to T	0.0762385	D
SRR8979762	ABEmaxAW	A to G	0.250638	C				SRR8910094	eA3A-BE3	C to T	0.0413191	D
SRR8979755	ABEmaxAW	A to G	0.253511	C				SRR11561283	BE4-AmAPOBEC1	C to T	0.0488232	E
SRR8979750	ABEmax (TadA E59A)	A to G	0.314579	C				SRR11561285	BE4-AmAPOBEC1	C to T	0.0479914	E
SRR8979753	ABEmax (TadA E59A)	A to G	0.452476	C				SRR11561291	BE4-RrA3F	C to T	0.0436295	E
SRR8979758	ABEmax (TadA E59A)	A to G	0.391085	C				SRR11561280	BE4-SsAPOBEC3B	C to T	0.0483621	E
SRR8979752	ABEmax (TadA E59A, TadA* E59A)	A to G	0.214884	C				SRR11561303	nCas9	C to T	0.0424838	E
SRR8979749	ABEmax (TadA E59A, TadA* E59A)	A to G	0.217927	C				SRR11561309	BE4-PpAPOBEC1-R33A	C to T	0.0467656	E
SRR8979761	ABEmax (TadA E59A, TadA* E59A)	A to G	0.221305	C				SRR11561321	BE4-rAPOBEC1-K34A-H122A	C to T	0.0527783	E
SRR8979760	Cas9D10A	A to G	0.20843	C				SRR11561293	BE4-RrA3F	C to T	0.0435242	E
SRR8979757	Cas9D10A	A to G	0.215793	C				SRR11561322	BE4-rAPOBEC1-K34A-H122A	C to T	0.0526184	E
SRR8979748	Cas9D10A	A to G	0.210075	C				SRR11561298	BE4-rAPOBEC1	C to T	0.710634	E
SRR8909014	V82G	A to G	0.114586	D				SRR11561282	BE4-AmAPOBEC1	C to T	0.0489475	E
SRR8909001	miniABEmax	A to G	1.1271	D				SRR11561289	nCas9	C to T	0.0428073	E
SRR8909007	K20A/R21A	A to G	0.179983	D				SRR11561318	BE4-rAPOBEC1-K34A-H122A	C to T	0.0499714	E
SRR8909011	ABEmax	A to G	0.869642	D				SRR11561325	nCas9	C to T	0.0429548	E
SRR8909017	ABEmax	A to G	0.874457	D				SRR11561299	BE4-rAPOBEC1	C to T	0.712644	E
SRR8908977	K20A/R21A	A to G	0.107765	D				SRR11561302	BE4-PpAPOBEC1-H122A	C to T	0.0735249	E
SRR8909019	K20A/R21A	A to G	0.207305	D				SRR11561313	BE4-PpAPOBEC1	C to T	0.0697762	E
SRR8909013	K20A/R21A	A to G	0.193703	D				SRR11561314	nCas9	C to T	0.0422681	E
SRR8908987	K20A/R21A	A to G	0.224862	D				SRR11561284	BE4-AmAPOBEC1	C to T	0.0489551	E
SRR8908983	V82G	A to G	0.143567	D				SRR11561292	BE4-RrA3F	C to T	0.0435415	E
SRR8909015	GFP	A to G	0.0176225	D				SRR11561315	BE4-PpAPOBEC1	C to T	0.0688108	E
SRR8908978	V82G	A to G	0.0990144	D				SRR11561304	BE4-PpAPOBEC1-R33A	C to T	0.0468314	E
SRR8909005	ABEmax	A to G	0.899944	D				SRR11561290	BE4-RrA3F	C to T	0.0437871	E
SRR8908996	miniABEmax	A to G	1.03275	D				SRR11561326	nCas9	C to T	0.0429571	E
SRR8908980	ABEmax	A to G	0.970088	D				SRR11561295	BE4-PpAPOBEC1-H122A	C to T	0.0705598	E
SRR8909018	miniABEmax	A to G	0.8446	D				SRR11561297	BE4-rAPOBEC1	C to T	0.710767	E
SRR8909006	miniABEmax	A to G	0.94373	D				SRR11561323	BE4-rAPOBEC1	C to T	0.727339	E
SRR8909012	miniABEmax	A to G	0.720494	D				SRR11561286	BE4-AmAPOBEC1	C to T	0.0480337	E
SRR8908985	ABEmax	A to G	0.82216	D				SRR11561281	BE4-AmAPOBEC1	C to T	0.0491198	E
SRR8908988	V82G	A to G	0.144829	D				SRR11561276	BE4-SsAPOBEC3B	C to T	0.0482991	E
SRR8908992	K20A/R21A	A to G	0.152886	D				SRR11561308	BE4-PpAPOBEC1-R33A	C to T	0.0467015	E
SRR8908976	miniABEmax	A to G	0.532926	D				SRR11561305	BE4-PpAPOBEC1-R33A	C to T	0.0468076	E
SRR8908990	ABEmax	A to G	0.598942	D				SRR11561294	BE4-PpAPOBEC1-H122A	C to T	0.0700528	E
SRR8908981	miniABEmax	A to G	1.05807	D				SRR11561301	BE4-PpAPOBEC1-H122A	C to T	0.0733706	E
SRR8909009	GFP	A to G	0.0166934	D				SRR11561279	BE4-SsAPOBEC3B	C to T	0.0485396	E
SRR8910104	GFP	A to G	0.0317414	D				SRR11561320	BE4-rAPOBEC1-K34A-H122A	C to T	0.0517597	E
SRR8909008	V82G	A to G	0.105679	D				SRR11561287	BE4-RrA3F	C to T	0.0438757	E
SRR8909000	ABEmax	A to G	0.972657	D				SRR11561274	BE4-SsAPOBEC3B	C to T	0.0491266	E
SRR8908998	V82G	A to G	0.115471	D				SRR11561319	BE4-rAPOBEC1-K34A-H122A	C to T	0.0517218	E
SRR8909021	GFP	A to G	0.0213136	D				SRR11561317	BE4-rAPOBEC1-K34A-H122A	C to T	0.0500156	E
SRR8908986	miniABEmax	A to G	0.9585	D				SRR11561306	BE4-PpAPOBEC1-R33A	C to T	0.0465481	E
SRR8908975	ABEmax	A to G	0.60256	D				SRR11561312	BE4-PpAPOBEC1	C to T	0.0698224	E
SRR8908995	ABEmax	A to G	0.910073	D				SRR11561311	BE4-PpAPOBEC1	C to T	0.0703055	E
SRR8908997	K20A/R21A	A to G	0.221136	D				SRR11561310	BE4-PpAPOBEC1	C to T	0.0704882	E
SRR8908991	miniABEmax	A to G	0.607304	D				SRR11561300	BE4-PpAPOBEC1-H122A	C to T	0.0579963	E
SRR8909002	K20A/R21A	A to G	0.23558	D				SRR11561316	BE4-PpAPOBEC1	C to T	0.0688146	E
SRR8908993	V82G	A to G	0.10053	D				SRR11561296	BE4-PpAPOBEC1-H122A	C to T	0.0580741	E
SRR8908982	K20A/R21A	A to G	0.222778	D				SRR11561288	BE4-RrA3F	C to T	0.0437885	E
SRR8909003	V82G	A to G	0.116301	D				SRR11561277	BE4-SsAPOBEC3B	C to T	0.0481139	E
SRR8909020	V82G	A to G	0.122015	D				SRR11561324	BE4-rAPOBEC1	C to T	0.728573	E
SRR6951152	SA1Q	A to G	0.0560497	F				SRR11561307	BE4-PpAPOBEC1-R33A	C to T	0.0467683	E
SRR6951149	SA1+gRNA	A to G	0.0262749	F				SRR8790752	APOBEC1	C to T	0.52117	H
SRR6951155	SA2Q	A to G	0.0689669	F				SRR8790757	GFP	C to T	0.0268041	H
SRR6951153	SA1Q	A to G	0.0622505	F				SRR8790749	BE3(W90A)-site 3	C to T	0.0253436	H
SRR6951154	SA2Q	A to G	0.066671	F				SRR8790770	BE3(hA3A)-site 3	C to T	0.124078	H
SRR6951147	ctrl	A to G	0.0239767	F				SRR8790754	APOBEC1	C to T	0.563933	H
SRR6951151	SA2+gRNA	A to G	0.0277335	F				SRR8790756	GFP	C to T	0.0270971	H
SRR6951148	SA1+gRNA	A to G	0.0268823	F				SRR9027802	BE3(hA3AR128A)-site 3	C to T	0.0515142	H
SRR6951150	SA2+gRNA	A to G	0.0275706	F				SRR8790758	BE3-site 3	C to T	0.12501	H
SRR6951146	ctrl	A to G	0.0214645	F				SRR9027801	BE3(W90Y/R126E)-site 3	C to T	0.0669803	H
SRR6951159	SA2Q+gRNA	A to G	0.0707597	F				SRR8790768	BE3(hA3A)-site 3	C to T	0.114006	H
SRR6951156	SA1Q+gRNA	A to G	0.067629	F				SRR8790778	BE3	C to T	0.330395	H
SRR6951157	SA1Q+gRNA	A to G	0.0621133	F				SRR8790769	BE3(hA3A)-site 3	C to T	0.109703	H
SRR6951159	SA2Q+gRNA	A to G	0.0707597	F				SRR9027810	BE3(hA3AY130F)-site 3	C to T	0.0304336	H
SRR6951158	SA2Q+gRNA	A to G	0.0693148	F				SRR8790755	APOBEC1	C to T	0.566759	H
SRR8326945	gRNA	A to G	0.0316602	G				SRR8790777	GFP	C to T	0.0286448	H
SRR8326944	GluR2 adRNA	A to G	0.0315204	G				SRR8790776	GFP	C to T	0.0278226	H
SRR8326920	MCP-ADAR1 DD-NLS - MS2 adRNA	A to G	0.359544	G				SRR8790748	BE3(W90A)-site 3	C to T	0.0269247	H
SRR8326939	ADAR2 (E488Q) +GluR2 adRNA	A to G	2.1727	G				SRR8790773	GFP	C to T	0.0266362	H
SRR8326921	MCP-ADAR1 DD-NLS + MS2 adRNA	A to G	0.423978	G				SRR8790781	BE3	C to T	0.418124	H
SRR8326929	MCP-ADAR2 DD (E488Q)-NES + MS2 adRNA	A to G	0.521167	G				SRR8790779	BE3	C to T	0.330471	H
SRR8326924	MCP-ADAR1 DD (E1008Q)-NLS - MS2 adRNA	A to G	0.963013	G				SRR8790747	BE3-site 3	C to T	0.123275	H
SRR8326918	MCP-ADAR1 DD-NES - MS2 adRNA	A to G	1.08486	G				SRR9027794	BE3(hA3AR128A)-site 3	C to T	0.0505986	H
SRR8326941	Cas13b-ADAR2 DD (E488Q) + gRNA	A to G	0.613535	G				SRR8790771	BE3(W90A)-site 3	C to T	0.0254571	H
SRR8326922	MCP-ADAR1 DD (E1008Q)-NES - MS2 adRNA	A to G	2.0427	G				SRR8790760	BE3-RNF2	C to T	0.141794	H
SRR8326940	Cas13b-ADAR2 DD (E488Q) - gRNA	A to G	1.09471	G				SRR8790761	BE3-RNF2	C to T	0.156182	H
SRR8326932	MCP-ADAR2 DD (E488Q)-NLS - MS2 adRNA	A to G	0.374883	G				SRR9027808	BE3(hA3AY130F)-site 3	C to T	0.0314273	H
SRR8326927	MCP-ADAR2 DD-NES + MS2 adRNA	A to G	0.285166	G				SRR9027793	BE3(hA3AR128A)-site 3	C to T	0.05041	H
SRR8326931	MCP-ADAR2 DD-NLS + MS2 adRNA	A to G	0.144143	G				SRR9027807	BE3(hA3AY130F)-site 3	C to T	0.0310357	H
SRR8326925	MCP-ADAR1 DD (E1008Q)-NLS +MS2 adRNA	A to G	1.14557	G				SRR9027800	BE3(W90Y/R126E)-site 3	C to T	0.063283	H
SRR8326923	MCP-ADAR1 DD (E1008Q)-NES + MS2 adRNA	A to G	1.84085	G				SRR8790759	BE3-RNF2	C to T	0.160366	H
SRR8326933	MCP-ADAR2 DD (E488Q)-NLS + MS2 adRNA	A to G	0.479174	G				SRR8790772	GFP	C to T	0.0265708	H
SRR8326926	MCP-ADAR2 DD-NES - MS2 adRNA	A to G	0.183717	G				SRR8096304	BE3-R33A/K34A	C to T	0.0445044	I
SRR8326937	ADAR2 + GluR2 adRNA	A to G	0.380774	G				SRR8096300	BE3-E63Q	C to T	0.0339399	I
SRR8326936	ADAR2 - GluR2 adRNA	A to G	0.143532	G				SRR8096306	BE3	C to T	3.68285	I
SRR8326930	MCP-ADAR2 DD-NLS - MS2 adRNA	A to G	0.151107	G				SRR8096267	BE3-R33A	C to T	0.176971	I
SRR8326919	MCP-ADAR1 DD-NES + MS2 adRNA	A to G	0.987674	G				SRR8096262	BE3	C to T	3.73953	I
SRR8326916	293T	A to G	0.0445218	G				SRR8096302	BE3	C to T	3.06008	I
SRR8326928	MCP-ADAR2 DD (E488Q)-NES - MS2 adRNA	A to G	0.443331	G				SRR8096308	BE3-R33A/K34A	C to T	0.0463135	I
SRR8790763	ABE7.10-site 1	A to G	0.235302	H				SRR8096312	BE3-R33A/K34A	C to T	0.0417666	I
SRR8790780	ABE7.10	A to G	0.280503	H				SRR8096311	BE3-R33A	C to T	0.13677	I
SRR8790743	ABE7.10(D53E)-site 1	A to G	0.230149	H				SRR8096298	BE3-E63Q	C to T	0.0357792	I
SRR8790757	GFP	A to G	0.0189775	H				SRR8096303	BE3-R33A	C to T	0.139406	I
SRR8790750	TadA-TadA*	A to G	0.434643	H				SRR8096263	BE3-E63Q	C to T	0.0371529	I
SRR9027783	ABE7.10(F148A)-site 2	A to G	0.0732254	H				SRR8096307	BE3-R33A	C to T	0.148341	I
SRR9027787	ABE7.10(F148A)-site 2	A to G	0.0769035	H				SRR8096310	BE3	C to T	3.18399	I
SRR8790753	TadA-TadA*	A to G	0.390418	H				SRR8096269	BE3-R33A/K34A	C to T	0.0501789	I
SRR8790774	ABE7.10	A to G	0.230612	H				SRR8832240	GFP	C to T	0.0327211	I
SRR8790762	ABE7.10-site 1	A to G	0.240571	H
SRR8790777	GFP	A to G	0.0199183	H
SRR8790767	ABE7.10-site 2	A to G	0.316057	H
SRR8790751	TadA-TadA*	A to G	0.430782	H
SRR8790738	ABE7.10(F148A)-site 1	A to G	0.0409959	H
SRR8790776	GFP	A to G	0.0200687	H
SRR8790773	GFP	A to G	0.0200176	H
SRR8790744	ABE7.10(D53E)-site 1	A to G	0.181832	H
SRR8790775	ABE7.10	A to G	0.225336	H
SRR8790742	ABE7.10(D53E)-site 1	A to G	0.221996	H
SRR8790739	ABE7.10(F148A)-site 1	A to G	0.040739	H
SRR8790765	ABE7.10-site 2	A to G	0.328439	H
SRR9027788	ABE7.10(F148A)-site 2	A to G	0.0689146	H
SRR8790745	ABE7.10(F148A)-site 1	A to G	0.0365655	H
SRR8790766	ABE7.10-site 2	A to G	0.335752	H
SRR8790764	ABE7.10-site 1	A to G	0.238618	H
SRR8790772	GFP	A to G	0.0193369	H
SRR8790763	ABE7.10-site 1	A to G	0.235302	H
SRR8790780	ABE7.10	A to G	0.280503	H
SRR8790743	ABE7.10(D53E)-site 1	A to G	0.230149	H
SRR8790757	GFP	A to G	0.0189775	H
SRR8790750	TadA-TadA*	A to G	0.434643	H
SRR9027783	ABE7.10(F148A)-site 2	A to G	0.0732254	H
SRR8790756	GFP	A to G	0.0189126	H
SRR9027787	ABE7.10(F148A)-site 2	A to G	0.0769035	H
SRR8790753	TadA-TadA*	A to G	0.390418	H
SRR8790774	ABE7.10	A to G	0.230612	H
SRR8790762	ABE7.10-site 1	A to G	0.240571	H
SRR8790777	GFP	A to G	0.0199183	H
SRR8790767	ABE7.10-site 2	A to G	0.316057	H
SRR8790751	TadA-TadA*	A to G	0.430782	H
SRR8790738	ABE7.10(F148A)-site 1	A to G	0.0409959	H
SRR8790776	GFP	A to G	0.0200687	H
SRR8790773	GFP	A to G	0.0200176	H
SRR8790744	ABE7.10(D53E)-site 1	A to G	0.181832	H
SRR8790775	ABE7.10	A to G	0.225336	H
SRR8790742	ABE7.10(D53E)-site 1	A to G	0.221996	H
SRR8790739	ABE7.10(F148A)-site 1	A to G	0.040739	H
SRR8790765	ABE7.10-site 2	A to G	0.328439	H
SRR9027788	ABE7.10(F148A)-site 2	A to G	0.0689146	H
SRR8790745	ABE7.10(F148A)-site 1	A to G	0.0365655	H
SRR8790766	ABE7.10-site 2	A to G	0.335752	H
SRR8790764	ABE7.10-site 1	A to G	0.238618	H
SRR8790772	GFP	A to G	0.0193369	H

## Sheet: Supp. table 3
Table S3: p-values all tests presented in Fig. 2				Statistical comparison of index values between base-editor samples and controls.
P-value, t-statistic (t), degrees of freedom (df) and confidance intervals (CI) were calculated using R "t.test" function (two-sided unpaired t-test), comparing log(index).
Accordingly, the confidence interval and the effect size shown are for the difference in mean(log(index)) between sample and control. Hedges' g effect size was calculated using R.
A-to-G													C-to-T
Name	Number of samples	p-value	t	df	CI lower	CI upper	Effect size	Dataset					Name	Number of samples	p-value	t	df	CI lower	CI upper	Effect size	Dataset
RESCUE	9							A					RESCUE	9							A
RESCUE+S375N	9							A					RESCUE+S375N	9							A
RESCUE+S375C	9							A					RESCUE+S375C	9							A
RESCUE+S375A	9							A					RESCUE+S375A	9							A
RESCUE+N473I	9							A					RESCUE+N473I	9							A
REPAIRv1(X85W)	6							A					REPAIRv1(X85W)	6							A
REPAIRv2	6							A					REPAIRv2	6							A
REPAIRv1(N81S)	9							A					REPAIRv1(N81S)	9							A
2BoxB-4LN-DD	1							B					GFP	3							D
2BoxB-4LN-DD NLS	1							B					hA3A-BE3	3	1.73438e-06	110.199	2.98645	1.37107	1.45284	71.982	D
2BoxB-4LN-DD E488Q	1							B					eA3A-BE3	3	0.000743667	10.0253	3.7722	0.0684524	0.122666	6.5485	D
2BoxB-4LN-DD E488Q NLS	1							B					hAID-BE3	3	0.0017921	8.4655	3.5424	0.057318	0.117799	5.52964	D
2BoxB-No enzyme	1							B					nCas9	5							E
No guide-4LN-DD NLS	1							B					BE4-rAPOBEC1	5	2.23172e-15	432.327	6.32377	1.21888	1.23258	246.967	E
No guide-4LN-DD E488Q NLS	1							B					BE4-rAPOBEC1-K34A-H122A	6	1.6537e-06	18.1582	6.05179	0.0702409	0.0920675	10.0529	E
No guide-No enzyme	1							B					BE4-PpAPOBEC1	6	1.92161e-14	92.3952	8.79227	0.207439	0.21789	51.1525	E
Cas9D10A	3							C					BE4-PpAPOBEC1-R33A	6	2.82468e-06	27.109	4.62466	0.0354813	0.0431203	15.0083	E
ABEmax	3	0.000467753	24.2946	2.52152	0.276615	0.37138	15.8691	C					BE4-PpAPOBEC1-H122A	6	0.000178414	9.79845	5.04935	0.144136	0.246252	5.42469	E
ABETadAE59A	3	0.0294334	5.56989	2.03961	0.0620577	0.451424	3.63824	C					BE4-RrA3F	6	0.000861156	6.61184	5.43167	0.00622241	0.0138393	3.6605	E
ABETadAE59ATadAevoE59A	3	0.0878313	2.27847	3.83284	-0.00320782	0.0299612	1.48829	C					BE4-AmAPOBEC1	6	1.99021e-09	24.6617	8.79932	0.0514448	0.0618757	13.6534	E
ABEmaxAW	3	0.000452796	13.7126	3.36557	0.057765	0.0900571	8.95703	C					BE4-SsAPOBEC3B	5	5.14332e-09	26.5034	7.91584	0.0504481	0.060083	15.1401	E
GFP	2							D					GFP	6							H
ABEmax	9	1.3164e-12	57.1206	8.79017	1.61458	1.74825	40.8258	D					APOBEC1	3	4.06916e-06	101.092	2.82673	1.26258	1.34768	63.5402	H
miniABEmax	9	1.19689e-11	42.6304	8.95064	1.60261	1.78239	30.4692	D					BE3	3	0.000726037	32.421	2.09562	0.975713	1.25979	20.3779	H
K20A/R21A	9	5.92877e-10	27.3358	8.9767	0.956312	1.12894	19.5377	D					BE3-RNF2	3	0.000139893	43.8135	2.42895	0.68573	0.810388	27.5385	H
V82G	9	1.47049e-09	36.0843	7.36698	0.779764	0.887957	25.7905	D					BE3-site 3	2	1.09308e-10	108.584	5.71102	0.643479	0.673525	77.0943	H
ctrl	2							F					BE3(W90Y/R126E)-site 3	2	0.00698789	28.2219	1.38638	0.287642	0.468777	20.0375	H
SA1+gRNA	2	0.202214	2.80134	1.08513	-0.190815	0.328311	1.60077	F					BE3(W90A)-site 3	3	0.0972605	-2.22349	3.62385	-0.0509343	0.00667253	-1.39755	H
SA2+gRNA	2	0.172669	3.57195	1.00566	-0.215807	0.387747	2.04111	F					BE3(hA3A)-site 3	3	0.000186841	37.742	2.45438	0.567908	0.688504	23.7224	H
SA1Q	2	0.0063577	12.5493	1.99433	0.27272	0.558486	7.17102	F					BE3(hA3AR128A)-site 3	3	8.50021e-10	45.1308	6.91056	0.256561	0.285012	28.3665	H
SA2Q	2	0.0204081	18.9203	1.18552	0.253118	0.697949	10.8116	F					BE3(hA3AY130F)-site 3	3	8.53486e-05	8.35211	6.74105	0.0396165	0.0712511	5.24963	H
SA1Q+gRNA	2	0.0056887	15.0394	1.87591	0.316846	0.594961	8.59395	F					GFP	1							I
SA2Q+gRNA	3	0.0287581	20.2751	1.031	0.204341	0.777746	13.4608	F					BE3	4							I
293T	1							G					BE3-R33A	4							I
293T+GFP	1							G					BE3-R33A/K34A	4							I
gRNA	1							G					BE3-E63Q	3							I
Cas13b-ADAR2 DD (E488Q) - gRNA	1							G
Cas13b-ADAR2 DD (E488Q) + gRNA	1							G
GluR2 adRNA	1							G
ADAR2 - GluR2 adRNA	1							G
ADAR2 + GluR2 adRNA	1							G
ADAR2 (E488Q) - Glu R2adRNA	1							G
ADAR2 (E488Q) +GluR2 adRNA	1							G
MS2 adRNA	1							G
MCP-ADAR1 DD-NLS - MS2 adRNA	1							G
MCP-ADAR1 DD-NLS + MS2 adRNA	1							G
MCP-ADAR1 DD (E1008Q)-NLS - MS2 adRNA	1							G
MCP-ADAR1 DD (E1008Q)-NLS +MS2 adRNA	1							G
MCP-ADAR1 DD-NES - MS2 adRNA	1							G
MCP-ADAR1 DD-NES + MS2 adRNA	1							G
MCP-ADAR1 DD (E1008Q)-NES - MS2 adRNA	1							G
MCP-ADAR1 DD (E1008Q)-NES + MS2 adRNA	1							G
MCP-ADAR2 DD-NLS - MS2 adRNA	1							G
MCP-ADAR2 DD-NLS + MS2 adRNA	1							G
MCP-ADAR2 DD (E488Q)-NLS - MS2 adRNA	1							G
MCP-ADAR2 DD (E488Q)-NLS + MS2 adRNA	1							G
MCP-ADAR2 DD-NES - MS2 adRNA	1							G
MCP-ADAR2 DD-NES + MS2 adRNA	1							G
MCP-ADAR2 DD (E488Q)-NES - MS2 adRNA	1							G
MCP-ADAR2 DD (E488Q)-NES + MS2 adRNA	1							G
GFP	6							H
TadA-TadA*	3	2.83023e-05	84.8127	2.42744	1.27325	1.38784	53.3081	H
ABE7.10	3	0.000574166	35.9134	2.10272	0.971647	1.2226	22.573	H
ABE7.10-site 1	3	2.83895e-14	194.797	6.96505	1.0729	1.0993	122.437	H
ABE7.10(D53E)-site 1	3	0.000750332	32.0594	2.09223	0.899112	1.16472	20.1506	H
ABE7.10(F148A)-site 1	3	0.00136352	18.0992	2.36549	0.241853	0.367176	11.3761	H
ABE7.10-site 2	3	6.66599e-08	135.054	3.66023	1.19722	1.24942	84.887	H
ABE7.10(F148A)-site 2	3	0.000147595	39.2072	2.50384	0.5201	0.624326	24.6433	H

## Sheet: Supp. table 4
Table S4: Data presented in Fig. 3			Editing index values per DNA-seq sample
CDS							Filtered CDS
Run	Name	Editing type	AEI	Dataset			Run	Name	Editing type	AEI	Dataset
SRR8599739	ABE7.10	A to G	0.015219	J			SRR8599739	ABE7.10	A to G	0.0130616	J
SRR8599736	ABE7.10	A to G	0.0149939	J			SRR8599736	ABE7.10	A to G	0.012383	J
SRR8599735	ABE7.10	A to G	0.0133405	J			SRR8599735	ABE7.10	A to G	0.0111342	J
SRR8599740	ABE7.10	A to G	0.0148403	J			SRR8599740	ABE7.10	A to G	0.0122244	J
SRR8599739	ABE7.10	C to T	0.0154431	J			SRR8599739	ABE7.10	C to T	0.0123368	J
SRR8599736	ABE7.10	C to T	0.0145292	J			SRR8599736	ABE7.10	C to T	0.0114315	J
SRR8599735	ABE7.10	C to T	0.0133964	J			SRR8599735	ABE7.10	C to T	0.0106448	J
SRR8599740	ABE7.10	C to T	0.0157511	J			SRR8599740	ABE7.10	C to T	0.0125585	J
SRR8599742	ABE7.10-Tyr-E	A to G	0.0135566	J			SRR8599742	ABE7.10-Tyr-E	A to G	0.010955	J
SRR8599737	ABE7.10-Tyr-E	A to G	0.0197405	J			SRR8599737	ABE7.10-Tyr-E	A to G	0.0169793	J
SRR8599741	ABE7.10-Tyr-E	A to G	0.0135421	J			SRR8599741	ABE7.10-Tyr-E	A to G	0.0107266	J
SRR8599738	ABE7.10-Tyr-E	A to G	0.0188154	J			SRR8599738	ABE7.10-Tyr-E	A to G	0.0160939	J
SRR8599742	ABE7.10-Tyr-E	C to T	0.0140321	J			SRR8599742	ABE7.10-Tyr-E	C to T	0.0110509	J
SRR8599737	ABE7.10-Tyr-E	C to T	0.0150292	J			SRR8599737	ABE7.10-Tyr-E	C to T	0.0119048	J
SRR8599741	ABE7.10-Tyr-E	C to T	0.0136972	J			SRR8599741	ABE7.10-Tyr-E	C to T	0.0106875	J
SRR8599738	ABE7.10-Tyr-E	C to T	0.0139243	J			SRR8599738	ABE7.10-Tyr-E	C to T	0.0111751	J
SRR8169139	BE3	A to G	0.0132224	J			SRR8169139	BE3	A to G	0.0102563	J
SRR8169137	BE3	A to G	0.0150719	J			SRR8169137	BE3	A to G	0.012226	J
SRR8169136	BE3	A to G	0.0136462	J			SRR8169136	BE3	A to G	0.0107715	J
SRR8169138	BE3	A to G	0.0132733	J			SRR8169138	BE3	A to G	0.0104467	J
SRR8169139	BE3	C to T	0.0131921	J			SRR8169139	BE3	C to T	0.00997939	J
SRR8169137	BE3	C to T	0.014154	J			SRR8169137	BE3	C to T	0.0110852	J
SRR8169136	BE3	C to T	0.0141456	J			SRR8169136	BE3	C to T	0.0106608	J
SRR8169138	BE3	C to T	0.0134954	J			SRR8169138	BE3	C to T	0.010206	J
SRR8169135	BE3-Tyr-C	A to G	0.0135116	J			SRR8169135	BE3-Tyr-C	A to G	0.0106051	J
SRR8169133	BE3-Tyr-C	A to G	0.0140149	J			SRR8169133	BE3-Tyr-C	A to G	0.0112011	J
SRR8169134	BE3-Tyr-C	A to G	0.0133254	J			SRR8169134	BE3-Tyr-C	A to G	0.0103781	J
SRR8169132	BE3-Tyr-C	A to G	0.0150113	J			SRR8169132	BE3-Tyr-C	A to G	0.0121771	J
SRR8169135	BE3-Tyr-C	C to T	0.0149121	J			SRR8169135	BE3-Tyr-C	C to T	0.011255	J
SRR8169133	BE3-Tyr-C	C to T	0.0158492	J			SRR8169133	BE3-Tyr-C	C to T	0.0124363	J
SRR8169134	BE3-Tyr-C	C to T	0.0145493	J			SRR8169134	BE3-Tyr-C	C to T	0.011339	J
SRR8169132	BE3-Tyr-C	C to T	0.0162735	J			SRR8169132	BE3-Tyr-C	C to T	0.0127678	J
SRR8169131	BE3-Tyr-D	A to G	0.0143922	J			SRR8169131	BE3-Tyr-D	A to G	0.0114593	J
SRR8169130	BE3-Tyr-D	A to G	0.0137687	J			SRR8169130	BE3-Tyr-D	A to G	0.0109926	J
SRR8169140	BE3-Tyr-D	A to G	0.0164514	J			SRR8169140	BE3-Tyr-D	A to G	0.013505	J
SRR8169141	BE3-Tyr-D	A to G	0.0149241	J			SRR8169141	BE3-Tyr-D	A to G	0.0119893	J
SRR8169131	BE3-Tyr-D	C to T	0.0159967	J			SRR8169131	BE3-Tyr-D	C to T	0.0125795	J
SRR8169130	BE3-Tyr-D	C to T	0.016047	J			SRR8169130	BE3-Tyr-D	C to T	0.0128868	J
SRR8169140	BE3-Tyr-D	C to T	0.0166535	J			SRR8169140	BE3-Tyr-D	C to T	0.0133968	J
SRR8169141	BE3-Tyr-D	C to T	0.0161147	J			SRR8169141	BE3-Tyr-D	C to T	0.0127128	J
SRR6109561	Cas9	A to G	0.0152794	J			SRR6109561	Cas9	A to G	0.0108897	J
SRR6109564	Cas9	A to G	0.0141964	J			SRR6109564	Cas9	A to G	0.00977315	J
SRR6185434	Cas9	A to G	0.013473	J			SRR6185434	Cas9	A to G	0.00903654	J
SRR6185435	Cas9	A to G	0.0151169	J			SRR6185435	Cas9	A to G	0.0105627	J
SRR6109561	Cas9	C to T	0.0135763	J			SRR6109561	Cas9	C to T	0.00890236	J
SRR6109564	Cas9	C to T	0.0135966	J			SRR6109564	Cas9	C to T	0.00879247	J
SRR6185434	Cas9	C to T	0.0122013	J			SRR6185434	Cas9	C to T	0.0072479	J
SRR6185435	Cas9	C to T	0.0125978	J			SRR6185435	Cas9	C to T	0.00775554	J
SRR6109563	Cas9-Tyr-A	A to G	0.0144545	J			SRR6109563	Cas9-Tyr-A	A to G	0.0121439	J
SRR6109566	Cas9-Tyr-A	A to G	0.015106	J			SRR6109566	Cas9-Tyr-A	A to G	0.012698	J
SRR6109562	Cas9-Tyr-A	A to G	0.00996322	J			SRR6109562	Cas9-Tyr-A	A to G	0.00762459	J
SRR6109567	Cas9-Tyr-A	A to G	0.0112123	J			SRR6109567	Cas9-Tyr-A	A to G	0.00880421	J
SRR6109563	Cas9-Tyr-A	C to T	0.0114697	J			SRR6109563	Cas9-Tyr-A	C to T	0.00884304	J
SRR6109566	Cas9-Tyr-A	C to T	0.0115164	J			SRR6109566	Cas9-Tyr-A	C to T	0.00879109	J
SRR6109562	Cas9-Tyr-A	C to T	0.010597	J			SRR6109562	Cas9-Tyr-A	C to T	0.00795988	J
SRR6109567	Cas9-Tyr-A	C to T	0.0113149	J			SRR6109567	Cas9-Tyr-A	C to T	0.00860631	J
SRR6109559	Cas9-Tyr-B	A to G	0.0127529	J			SRR6109559	Cas9-Tyr-B	A to G	0.00871155	J
SRR6109560	Cas9-Tyr-B	A to G	0.0131138	J			SRR6109560	Cas9-Tyr-B	A to G	0.00876253	J
SRR6109568	Cas9-Tyr-B	A to G	0.0122831	J			SRR6109568	Cas9-Tyr-B	A to G	0.00995792	J
SRR6109559	Cas9-Tyr-B	C to T	0.0128448	J			SRR6109559	Cas9-Tyr-B	C to T	0.00825649	J
SRR6109560	Cas9-Tyr-B	C to T	0.0129105	J			SRR6109560	Cas9-Tyr-B	C to T	0.00803086	J
SRR6109568	Cas9-Tyr-B	C to T	0.0112092	J			SRR6109568	Cas9-Tyr-B	C to T	0.00857008	J
SRR8599743	Cas9-Tyr-C	A to G	0.0160465	J			SRR8599743	Cas9-Tyr-C	A to G	0.0133618	J
SRR8599744	Cas9-Tyr-C	A to G	0.0152113	J			SRR8599744	Cas9-Tyr-C	A to G	0.0127789	J
SRR8599743	Cas9-Tyr-C	C to T	0.0156004	J			SRR8599743	Cas9-Tyr-C	C to T	0.0124559	J
SRR8599744	Cas9-Tyr-C	C to T	0.0150768	J			SRR8599744	Cas9-Tyr-C	C to T	0.011949	J
SRR6109556	Cre	A to G	0.0133273	J			SRR6109556	Cre	A to G	0.0089356	J
SRR6109554	Cre	A to G	0.0127065	J			SRR6109554	Cre	A to G	0.00826704	J
SRR6109565	Cre	A to G	0.016102	J			SRR6109565	Cre	A to G	0.011661	J
SRR6109553	Cre	A to G	0.0135668	J			SRR6109553	Cre	A to G	0.00913676	J
SRR6109556	Cre	C to T	0.0130168	J			SRR6109556	Cre	C to T	0.00782673	J
SRR6109554	Cre	C to T	0.0130988	J			SRR6109554	Cre	C to T	0.00800895	J
SRR6109565	Cre	C to T	0.0133405	J			SRR6109565	Cre	C to T	0.00832358	J
SRR6109553	Cre	C to T	0.0136692	J			SRR6109553	Cre	C to T	0.00895439	J
SRR9703331	ABE	A to G	0.00891977	K			SRR9703331	ABE edited	A to G	0.00630641	K
SRR9703325	ABE	A to G	0.00900074	K			SRR9703324	ABE edited	A to G	0.00765001	K
SRR9703317	ABE	A to G	0.00910201	K			SRR9703325	ABE edited	A to G	0.00662672	K
SRR9703327	ABE	A to G	0.00903958	K			SRR9703317	ABE edited	A to G	0.00610304	K
SRR9703329	ABE	A to G	0.0094001	K			SRR9703327	ABE edited	A to G	0.00671968	K
SRR9703344	ABE	A to G	0.00960731	K			SRR9703329	ABE edited	A to G	0.00702184	K
SRR9703330	ABE	A to G	0.00883121	K			SRR9703344	ABE edited	A to G	0.00751758	K
SRR9703328	ABE	A to G	0.0103088	K			SRR9703330	ABE edited	A to G	0.00646746	K
SRR9703333	ABE	A to G	0.00941861	K			SRR9703328	ABE edited	A to G	0.00749387	K
SRR9703326	ABE	A to G	0.00945559	K			SRR9703333	ABE edited	A to G	0.00667106	K
SRR9703332	ABE	A to G	0.00963319	K			SRR9703326	ABE edited	A to G	0.00687737	K
SRR9703331	ABE	C to T	0.00634562	K			SRR9703332	ABE edited	A to G	0.00699796	K
SRR9703325	ABE	C to T	0.00612203	K			SRR9703331	ABE edited	C to T	0.00307408	K
SRR9703317	ABE	C to T	0.00645552	K			SRR9703324	ABE edited	C to T	0.00336299	K
SRR9703327	ABE	C to T	0.00614721	K			SRR9703325	ABE edited	C to T	0.00307262	K
SRR9703329	ABE	C to T	0.00646331	K			SRR9703317	ABE edited	C to T	0.00298775	K
SRR9703344	ABE	C to T	0.0064999	K			SRR9703327	ABE edited	C to T	0.00301133	K
SRR9703330	ABE	C to T	0.0060835	K			SRR9703329	ABE edited	C to T	0.00319037	K
SRR9703328	ABE	C to T	0.00681259	K			SRR9703344	ABE edited	C to T	0.003455	K
SRR9703333	ABE	C to T	0.00649229	K			SRR9703330	ABE edited	C to T	0.00301533	K
SRR9703326	ABE	C to T	0.0062537	K			SRR9703328	ABE edited	C to T	0.00341295	K
SRR9703332	ABE	C to T	0.00617112	K			SRR9703333	ABE edited	C to T	0.0032317	K
SRR9703312	BE4	A to G	0.00978402	K			SRR9703326	ABE edited	C to T	0.00301316	K
SRR9703313	BE4	A to G	0.00857148	K			SRR9703332	ABE edited	C to T	0.00317371	K
SRR9703319	BE4	A to G	0.00919169	K			SRR9703312	CBE edited	A to G	0.00710542	K
SRR9703318	BE4	A to G	0.0101469	K			SRR9703313	CBE edited	A to G	0.00611368	K
SRR9703337	BE4	A to G	0.00919444	K			SRR9703319	CBE edited	A to G	0.00674369	K
SRR9703315	BE4	A to G	0.00962367	K			SRR9703318	CBE edited	A to G	0.00733036	K
SRR9703312	BE4	C to T	0.00662919	K			SRR9703337	CBE edited	A to G	0.00637416	K
SRR9703313	BE4	C to T	0.00637543	K			SRR9703315	CBE edited	A to G	0.00698152	K
SRR9703319	BE4	C to T	0.00637934	K			SRR9703312	CBE edited	C to T	0.0032755	K
SRR9703318	BE4	C to T	0.00681731	K			SRR9703313	CBE edited	C to T	0.00308727	K
SRR9703337	BE4	C to T	0.00686712	K			SRR9703319	CBE edited	C to T	0.00318302	K
SRR9703315	BE4	C to T	0.00637519	K			SRR9703318	CBE edited	C to T	0.00338318	K
SRR9703341	Control	A to G	0.00872631	K			SRR9703337	CBE edited	C to T	0.00341816	K
SRR9703334	Control	A to G	0.00900586	K			SRR9703315	CBE edited	C to T	0.00331231	K
SRR9703320	Control	A to G	0.00866967	K			SRR9703353	none	A to G	0.000831989	K
SRR9703323	Control	A to G	0.00975421	K			SRR9703348	none	A to G	0.000831066	K
SRR9703338	Control	A to G	0.00979338	K			SRR9703350	none	A to G	0.000820482	K
SRR9703343	Control	A to G	0.00972491	K			SRR9703351	none	A to G	0.000858196	K
SRR9703340	Control	A to G	0.00950469	K			SRR9703345	none	A to G	0.000942606	K
SRR9703336	Control	A to G	0.00898147	K			SRR9703352	none	A to G	0.000848217	K
SRR9703342	Control	A to G	0.00906926	K			SRR9703349	none	A to G	0.00084447	K
SRR9703322	Control	A to G	0.00920406	K			SRR9703353	none	C to T	0.000515142	K
SRR9703321	Control	A to G	0.00990959	K			SRR9703348	none	C to T	0.000493543	K
SRR9703335	Control	A to G	0.00960713	K			SRR9703350	none	C to T	0.000490543	K
SRR9703339	Control	A to G	0.00888714	K			SRR9703351	none	C to T	0.000499657	K
SRR9703341	Control	C to T	0.00627979	K			SRR9703345	none	C to T	0.000526431	K
SRR9703334	Control	C to T	0.00652786	K			SRR9703352	none	C to T	0.00050841	K
SRR9703320	Control	C to T	0.00601649	K			SRR9703349	none	C to T	0.000543791	K
SRR9703323	Control	C to T	0.00671758	K			SRR9703341	non-injected	A to G	0.00634073	K
SRR9703338	Control	C to T	0.00674222	K			SRR9703334	non-injected	A to G	0.00650565	K
SRR9703343	Control	C to T	0.00656724	K			SRR9703320	non-injected	A to G	0.00612436	K
SRR9703340	Control	C to T	0.00654197	K			SRR9703323	non-injected	A to G	0.0075907	K
SRR9703336	Control	C to T	0.00719676	K			SRR9703338	non-injected	A to G	0.00737528	K
SRR9703342	Control	C to T	0.00650256	K			SRR9703343	non-injected	A to G	0.00738356	K
SRR9703322	Control	C to T	0.0062027	K			SRR9703340	non-injected	A to G	0.00678881	K
SRR9703321	Control	C to T	0.00677496	K			SRR9703336	non-injected	A to G	0.00646515	K
SRR9703335	Control	C to T	0.00673421	K			SRR9703342	non-injected	A to G	0.00680192	K
SRR9703339	Control	C to T	0.00615598	K			SRR9703322	non-injected	A to G	0.00641242	K
SRR9703353	Parents	A to G	0.00937123	K			SRR9703321	non-injected	A to G	0.00734247	K
SRR9703348	Parents	A to G	0.0102808	K			SRR9703335	non-injected	A to G	0.00709691	K
SRR9703350	Parents	A to G	0.00966794	K			SRR9703339	non-injected	A to G	0.00652455	K
SRR9703351	Parents	A to G	0.00940285	K			SRR9703341	non-injected	C to T	0.00315732	K
SRR9703345	Parents	A to G	0.011208	K			SRR9703334	non-injected	C to T	0.00316837	K
SRR9703352	Parents	A to G	0.0111471	K			SRR9703320	non-injected	C to T	0.00284046	K
SRR9703349	Parents	A to G	0.00966232	K			SRR9703323	non-injected	C to T	0.00338339	K
SRR9703353	Parents	C to T	0.0072333	K			SRR9703338	non-injected	C to T	0.00336334	K
SRR9703348	Parents	C to T	0.0072795	K			SRR9703343	non-injected	C to T	0.00332249	K
SRR9703350	Parents	C to T	0.00750294	K			SRR9703340	non-injected	C to T	0.00339801	K
SRR9703351	Parents	C to T	0.00772478	K			SRR9703336	non-injected	C to T	0.00364745	K
SRR9703345	Parents	C to T	0.00775355	K			SRR9703342	non-injected	C to T	0.00319287	K
SRR9703352	Parents	C to T	0.0073333	K			SRR9703322	non-injected	C to T	0.00307515	K
SRR9703349	Parents	C to T	0.007076	K			SRR9703321	non-injected	C to T	0.00358689	K
SRR10413084	BE4	C to T	0.0525254	L			SRR10413083	BE4	C to T	0.0140593	L
SRR10413104	BE4	C to T	0.0553249	L			SRR10413084	BE4	C to T	0.0267337	L
SRR10413087	BE4	C to T	0.0511662	L			SRR10413085	BE4	C to T	0.0288998	L
SRR10413083	BE4	C to T	0.0385508	L			SRR10413086	BE4	C to T	0.01807	L
SRR10413085	BE4	C to T	0.0549577	L			SRR10413087	BE4	C to T	0.0255971	L
SRR10413103	BE4	C to T	0.0460949	L			SRR10413103	BE4	C to T	0.0208942	L
SRR10413086	BE4	C to T	0.039474	L			SRR10413104	BE4	C to T	0.0290162	L
SRR10413090	nCas9	C to T	0.044392	L			SRR10413089	nCas9	C to T	0.00900299	L
SRR10413093	nCas9	C to T	0.0444438	L			SRR10413090	nCas9	C to T	0.0204193	L
SRR10413094	nCas9	C to T	0.0321562	L			SRR10413091	nCas9	C to T	0.0118366	L
SRR10413095	nCas9	C to T	0.0402359	L			SRR10413093	nCas9	C to T	0.0218525	L
SRR10413089	nCas9	C to T	0.0283872	L			SRR10413094	nCas9	C to T	0.00964848	L
SRR10413091	nCas9	C to T	0.0339948	L			SRR10413095	nCas9	C to T	0.0161552	L
SRR10413088	Parent	C to T	0.046216	L			SRR10413088	Parent	C to T	0.000876749	L
SRR10413081	YE1-BE4	C to T	0.0421522	L			SRR10413081	YE1-BE4	C to T	0.0197772	L
SRR10413097	YE1-BE4	C to T	0.0319005	L			SRR10413082	YE1-BE4	C to T	0.0210953	L
SRR10413102	YE1-BE4	C to T	0.0405484	L			SRR10413097	YE1-BE4	C to T	0.00865494	L
SRR10413101	YE1-BE4	C to T	0.0373687	L			SRR10413098	YE1-BE4	C to T	0.00960205	L
SRR10413100	YE1-BE4	C to T	0.0408821	L			SRR10413100	YE1-BE4	C to T	0.0174049	L
SRR10413098	YE1-BE4	C to T	0.0303389	L			SRR10413101	YE1-BE4	C to T	0.0163021	L
SRR10413082	YE1-BE4	C to T	0.0447477	L			SRR10413102	YE1-BE4	C to T	0.0169478	L
SRR11535392	BE4-AmAPOBEC1	C to T	0.0230805	E - Plasmid delivery			SRR11535385	BE4-AmAPOBEC1	C to T	0.00591765	E - Plasmid delivery
SRR11535453	BE4-AmAPOBEC1	C to T	0.0267627	E - Plasmid delivery			SRR11535386	BE4-AmAPOBEC1	C to T	0.00560715	E - Plasmid delivery
SRR11535388	BE4-AmAPOBEC1	C to T	0.0279341	E - Plasmid delivery			SRR11535387	BE4-AmAPOBEC1	C to T	0.00566448	E - Plasmid delivery
SRR11535395	BE4-AmAPOBEC1	C to T	0.0274093	E - Plasmid delivery			SRR11535388	BE4-AmAPOBEC1	C to T	0.00566065	E - Plasmid delivery
SRR11535389	BE4-AmAPOBEC1	C to T	0.0227495	E - Plasmid delivery			SRR11535389	BE4-AmAPOBEC1	C to T	0.00572106	E - Plasmid delivery
SRR11535445	BE4-AmAPOBEC1	C to T	0.0270916	E - Plasmid delivery			SRR11535390	BE4-AmAPOBEC1	C to T	0.00568694	E - Plasmid delivery
SRR11535385	BE4-AmAPOBEC1	C to T	0.0282316	E - Plasmid delivery			SRR11535391	BE4-AmAPOBEC1	C to T	0.00558112	E - Plasmid delivery
SRR11535451	BE4-AmAPOBEC1	C to T	0.0268097	E - Plasmid delivery			SRR11535392	BE4-AmAPOBEC1	C to T	0.00549002	E - Plasmid delivery
SRR11535391	BE4-AmAPOBEC1	C to T	0.0234646	E - Plasmid delivery			SRR11535394	BE4-AmAPOBEC1	C to T	0.00511735	E - Plasmid delivery
SRR11535386	BE4-AmAPOBEC1	C to T	0.0280036	E - Plasmid delivery			SRR11535395	BE4-AmAPOBEC1	C to T	0.00532105	E - Plasmid delivery
SRR11535447	BE4-AmAPOBEC1	C to T	0.0262152	E - Plasmid delivery			SRR11535396	BE4-AmAPOBEC1	C to T	0.00505264	E - Plasmid delivery
SRR11535448	BE4-AmAPOBEC1	C to T	0.0261701	E - Plasmid delivery			SRR11535445	BE4-AmAPOBEC1	C to T	0.00509053	E - Plasmid delivery
SRR11535449	BE4-AmAPOBEC1	C to T	0.0257953	E - Plasmid delivery			SRR11535446	BE4-AmAPOBEC1	C to T	0.00541367	E - Plasmid delivery
SRR11535446	BE4-AmAPOBEC1	C to T	0.0261215	E - Plasmid delivery			SRR11535447	BE4-AmAPOBEC1	C to T	0.00551975	E - Plasmid delivery
SRR11535387	BE4-AmAPOBEC1	C to T	0.0277322	E - Plasmid delivery			SRR11535448	BE4-AmAPOBEC1	C to T	0.00509518	E - Plasmid delivery
SRR11535390	BE4-AmAPOBEC1	C to T	0.0232458	E - Plasmid delivery			SRR11535449	BE4-AmAPOBEC1	C to T	0.00508602	E - Plasmid delivery
SRR11535396	BE4-AmAPOBEC1	C to T	0.027478	E - Plasmid delivery			SRR11535450	BE4-AmAPOBEC1	C to T	0.00529968	E - Plasmid delivery
SRR11535394	BE4-AmAPOBEC1	C to T	0.0272442	E - Plasmid delivery			SRR11535451	BE4-AmAPOBEC1	C to T	0.00544916	E - Plasmid delivery
SRR11535450	BE4-AmAPOBEC1	C to T	0.02681	E - Plasmid delivery			SRR11535453	BE4-AmAPOBEC1	C to T	0.00539141	E - Plasmid delivery
SRR11535454	BE4-AmAPOBEC1	C to T	0.0267137	E - Plasmid delivery			SRR11535454	BE4-AmAPOBEC1	C to T	0.00531325	E - Plasmid delivery
SRR11535481	BE4-PpAPOBEC1 H122A	C to T	0.0276564	E - Plasmid delivery			SRR11535589	BE4-PpAPOBEC1	C to T	0.00542528	E - Plasmid delivery
SRR11535480	BE4-PpAPOBEC1 H122A	C to T	0.0278075	E - Plasmid delivery			SRR11535590	BE4-PpAPOBEC1	C to T	0.00594727	E - Plasmid delivery
SRR11535479	BE4-PpAPOBEC1 H122A	C to T	0.027491	E - Plasmid delivery			SRR11535591	BE4-PpAPOBEC1	C to T	0.00583964	E - Plasmid delivery
SRR11535478	BE4-PpAPOBEC1 H122A	C to T	0.0278517	E - Plasmid delivery			SRR11535592	BE4-PpAPOBEC1	C to T	0.00567823	E - Plasmid delivery
SRR11535473	BE4-RrA3F F130L	C to T	0.0249379	E - Plasmid delivery			SRR11535593	BE4-PpAPOBEC1	C to T	0.00614626	E - Plasmid delivery
SRR11535455	BE4-RrA3F F130L	C to T	0.0245644	E - Plasmid delivery			SRR11535594	BE4-PpAPOBEC1	C to T	0.00595047	E - Plasmid delivery
SRR11535476	BE4-RrA3F F130L	C to T	0.0253284	E - Plasmid delivery			SRR11535595	BE4-PpAPOBEC1	C to T	0.0059459	E - Plasmid delivery
SRR11535471	BE4-RrA3F F130L	C to T	0.0250694	E - Plasmid delivery			SRR11535596	BE4-PpAPOBEC1	C to T	0.00607108	E - Plasmid delivery
SRR11535470	BE4-RrA3F F130L	C to T	0.0251909	E - Plasmid delivery			SRR11535598	BE4-PpAPOBEC1	C to T	0.0061152	E - Plasmid delivery
SRR11535474	BE4-RrA3F F130L	C to T	0.0246465	E - Plasmid delivery			SRR11535599	BE4-PpAPOBEC1	C to T	0.00638996	E - Plasmid delivery
SRR11535467	BE4-RrA3F F130L	C to T	0.0292508	E - Plasmid delivery			SRR11535600	BE4-PpAPOBEC1	C to T	0.00649534	E - Plasmid delivery
SRR11535458	BE4-RrA3F F130L	C to T	0.0252741	E - Plasmid delivery			SRR11535601	BE4-PpAPOBEC1	C to T	0.00602288	E - Plasmid delivery
SRR11535477	BE4-RrA3F F130L	C to T	0.0249353	E - Plasmid delivery			SRR11535602	BE4-PpAPOBEC1	C to T	0.00666562	E - Plasmid delivery
SRR11535456	BE4-RrA3F F130L	C to T	0.025452	E - Plasmid delivery			SRR11535603	BE4-PpAPOBEC1	C to T	0.00653694	E - Plasmid delivery
SRR11535460	BE4-RrA3F F130L	C to T	0.0262563	E - Plasmid delivery			SRR11535604	BE4-PpAPOBEC1	C to T	0.00632157	E - Plasmid delivery
SRR11535457	BE4-RrA3F F130L	C to T	0.0251968	E - Plasmid delivery			SRR11535605	BE4-PpAPOBEC1	C to T	0.0066512	E - Plasmid delivery
SRR11535459	BE4-RrA3F F130L	C to T	0.0263446	E - Plasmid delivery			SRR11535478	BE4-PpAPOBEC1 H122A	C to T	0.0050769	E - Plasmid delivery
SRR11535465	BE4-RrA3F F130L	C to T	0.0294365	E - Plasmid delivery			SRR11535479	BE4-PpAPOBEC1 H122A	C to T	0.00517316	E - Plasmid delivery
SRR11535468	BE4-RrA3F F130L	C to T	0.0290874	E - Plasmid delivery			SRR11535480	BE4-PpAPOBEC1 H122A	C to T	0.00545562	E - Plasmid delivery
SRR11535466	BE4-RrA3F F130L	C to T	0.029848	E - Plasmid delivery			SRR11535481	BE4-PpAPOBEC1 H122A	C to T	0.0054964	E - Plasmid delivery
SRR11535461	BE4-RrA3F F130L	C to T	0.0261696	E - Plasmid delivery			SRR11535582	BE4-PpAPOBEC1 H122A	C to T	0.005292	E - Plasmid delivery
SRR11535462	BE4-RrA3F F130L	C to T	0.0261461	E - Plasmid delivery			SRR11535583	BE4-PpAPOBEC1 H122A	C to T	0.00551758	E - Plasmid delivery
SRR11535469	BE4-RrA3F F130L	C to T	0.0255543	E - Plasmid delivery			SRR11535584	BE4-PpAPOBEC1 H122A	C to T	0.00533268	E - Plasmid delivery
SRR11535376	BE4-SsAPOBEC3B	C to T	0.0279994	E - Plasmid delivery			SRR11535585	BE4-PpAPOBEC1 H122A	C to T	0.00537369	E - Plasmid delivery
SRR11535378	BE4-SsAPOBEC3B	C to T	0.0280577	E - Plasmid delivery			SRR11535587	BE4-PpAPOBEC1 H122A	C to T	0.00538615	E - Plasmid delivery
SRR11535271	BE4-SsAPOBEC3B	C to T	0.026531	E - Plasmid delivery			SRR11535588	BE4-PpAPOBEC1 H122A	C to T	0.00558033	E - Plasmid delivery
SRR11535380	BE4-SsAPOBEC3B	C to T	0.0269827	E - Plasmid delivery			SRR11535606	BE4-rAPOBEC1	C to T	0.00642384	E - Plasmid delivery
SRR11535374	BE4-SsAPOBEC3B	C to T	0.0247939	E - Plasmid delivery			SRR11535607	BE4-rAPOBEC1	C to T	0.00648583	E - Plasmid delivery
SRR11535384	BE4-SsAPOBEC3B	C to T	0.0270394	E - Plasmid delivery			SRR11535609	BE4-rAPOBEC1	C to T	0.00670432	E - Plasmid delivery
SRR11535268	BE4-SsAPOBEC3B	C to T	0.0256049	E - Plasmid delivery			SRR11535610	BE4-rAPOBEC1	C to T	0.00642608	E - Plasmid delivery
SRR11535373	BE4-SsAPOBEC3B	C to T	0.0257453	E - Plasmid delivery			SRR11535611	BE4-rAPOBEC1	C to T	0.00585057	E - Plasmid delivery
SRR11535383	BE4-SsAPOBEC3B	C to T	0.0269071	E - Plasmid delivery			SRR11535612	BE4-rAPOBEC1	C to T	0.00578124	E - Plasmid delivery
SRR11535273	BE4-SsAPOBEC3B	C to T	0.0253593	E - Plasmid delivery			SRR11535613	BE4-rAPOBEC1	C to T	0.00589971	E - Plasmid delivery
SRR11535381	BE4-SsAPOBEC3B	C to T	0.027531	E - Plasmid delivery			SRR11535614	BE4-rAPOBEC1	C to T	0.00592117	E - Plasmid delivery
SRR11535270	BE4-SsAPOBEC3B	C to T	0.0260222	E - Plasmid delivery			SRR11535615	BE4-rAPOBEC1	C to T	0.0059317	E - Plasmid delivery
SRR11535379	BE4-SsAPOBEC3B	C to T	0.027453	E - Plasmid delivery			SRR11535616	BE4-rAPOBEC1	C to T	0.00580222	E - Plasmid delivery
SRR11535269	BE4-SsAPOBEC3B	C to T	0.0254271	E - Plasmid delivery			SRR11535617	BE4-rAPOBEC1	C to T	0.0054373	E - Plasmid delivery
SRR11535377	BE4-SsAPOBEC3B	C to T	0.0281514	E - Plasmid delivery			SRR11535618	BE4-rAPOBEC1	C to T	0.00612528	E - Plasmid delivery
SRR11535375	BE4-SsAPOBEC3B	C to T	0.0255733	E - Plasmid delivery			SRR11535620	BE4-rAPOBEC1	C to T	0.00566009	E - Plasmid delivery
SRR11535265	Cas9	C to T	0.0268993	E - Plasmid delivery			SRR11535621	BE4-rAPOBEC1	C to T	0.00540383	E - Plasmid delivery
SRR11535255	Cas9	C to T	0.0267185	E - Plasmid delivery			SRR11535622	BE4-rAPOBEC1	C to T	0.00562335	E - Plasmid delivery
SRR11535267	Cas9	C to T	0.0274481	E - Plasmid delivery			SRR11535623	BE4-rAPOBEC1	C to T	0.00534043	E - Plasmid delivery
SRR11535266	Cas9	C to T	0.0267318	E - Plasmid delivery			SRR11535624	BE4-rAPOBEC1	C to T	0.00563709	E - Plasmid delivery
SRR11535259	Cas9	C to T	0.02975	E - Plasmid delivery			SRR11535625	BE4-rAPOBEC1	C to T	0.00557342	E - Plasmid delivery
SRR11535264	Cas9	C to T	0.0275328	E - Plasmid delivery			SRR11535626	BE4-rAPOBEC1	C to T	0.0055194	E - Plasmid delivery
SRR11535263	Cas9	C to T	0.0295312	E - Plasmid delivery			SRR11535627	BE4-rAPOBEC1	C to T	0.00552769	E - Plasmid delivery
SRR11535393	BE4-PpAPOBEC1	C to T	0.0293412	E- mRna delivery			SRR11535455	BE4-RrA3F F130L	C to T	0.00555928	E - Plasmid delivery
SRR11535463	BE4-PpAPOBEC1	C to T	0.0290126	E- mRna delivery			SRR11535456	BE4-RrA3F F130L	C to T	0.00576995	E - Plasmid delivery
SRR11535272	BE4-PpAPOBEC1	C to T	0.029755	E- mRna delivery			SRR11535457	BE4-RrA3F F130L	C to T	0.00567202	E - Plasmid delivery
SRR11535475	BE4-PpAPOBEC1	C to T	0.0299273	E- mRna delivery			SRR11535458	BE4-RrA3F F130L	C to T	0.00558749	E - Plasmid delivery
SRR11535382	BE4-PpAPOBEC1	C to T	0.0298104	E- mRna delivery			SRR11535459	BE4-RrA3F F130L	C to T	0.00563735	E - Plasmid delivery
SRR11535452	BE4-PpAPOBEC1	C to T	0.0299879	E- mRna delivery			SRR11535460	BE4-RrA3F F130L	C to T	0.00560374	E - Plasmid delivery
SRR11535434	BE4-rAPOBEC1	C to T	0.0289559	E- mRna delivery			SRR11535461	BE4-RrA3F F130L	C to T	0.00562721	E - Plasmid delivery
SRR11535371	BE4-rAPOBEC1	C to T	0.0256488	E- mRna delivery			SRR11535462	BE4-RrA3F F130L	C to T	0.00554219	E - Plasmid delivery
SRR11535330	BE4-rAPOBEC1	C to T	0.0266306	E- mRna delivery			SRR11535465	BE4-RrA3F F130L	C to T	0.00564918	E - Plasmid delivery
SRR11535352	BE4-rAPOBEC1	C to T	0.0303129	E- mRna delivery			SRR11535466	BE4-RrA3F F130L	C to T	0.00558783	E - Plasmid delivery
SRR11535423	BE4-rAPOBEC1	C to T	0.028596	E- mRna delivery			SRR11535467	BE4-RrA3F F130L	C to T	0.0053896	E - Plasmid delivery
SRR11535370	BE4-rAPOBEC1	C to T	0.0276351	E- mRna delivery			SRR11535468	BE4-RrA3F F130L	C to T	0.00542798	E - Plasmid delivery
SRR11535296	BE4-rAPOBEC1	C to T	0.0270599	E- mRna delivery			SRR11535469	BE4-RrA3F F130L	C to T	0.00561225	E - Plasmid delivery
SRR11535319	BE4-rAPOBEC1	C to T	0.0271457	E- mRna delivery			SRR11535470	BE4-RrA3F F130L	C to T	0.00550802	E - Plasmid delivery
SRR11535341	BE4-rAPOBEC1	C to T	0.026661	E- mRna delivery			SRR11535471	BE4-RrA3F F130L	C to T	0.00557898	E - Plasmid delivery
SRR11535372	BE4-rAPOBEC1	C to T	0.0258625	E- mRna delivery			SRR11535472	BE4-RrA3F F130L	C to T	0.00547599	E - Plasmid delivery
SRR11535401	BE4-rAPOBEC1	C to T	0.029611	E- mRna delivery			SRR11535473	BE4-RrA3F F130L	C to T	0.00550422	E - Plasmid delivery
SRR11535307	BE4-rAPOBEC1	C to T	0.0266237	E- mRna delivery			SRR11535474	BE4-RrA3F F130L	C to T	0.00547747	E - Plasmid delivery
SRR11535486	BE4-rAPOBEC1	C to T	0.0237132	E- mRna delivery			SRR11535476	BE4-RrA3F F130L	C to T	0.0055521	E - Plasmid delivery
SRR11535412	BE4-rAPOBEC1	C to T	0.0284854	E- mRna delivery			SRR11535477	BE4-RrA3F F130L	C to T	0.00537859	E - Plasmid delivery
SRR11515481	BE4-rAPOBEC1	C to T	0.0262759	E- mRna delivery			SRR11535268	BE4-SsAPOBEC3B	C to T	0.00597622	E - Plasmid delivery
SRR11535464	BE4-rAPOBEC1	C to T	0.0257988	E- mRna delivery			SRR11535269	BE4-SsAPOBEC3B	C to T	0.00585334	E - Plasmid delivery
SRR11535308	BE4-rAPOBEC1	C to T	0.0256885	E- mRna delivery			SRR11535270	BE4-SsAPOBEC3B	C to T	0.00620349	E - Plasmid delivery
SRR11535274	BE4-rAPOBEC1	C to T	0.0242146	E- mRna delivery			SRR11535271	BE4-SsAPOBEC3B	C to T	0.0063349	E - Plasmid delivery
SRR11535285	BE4-rAPOBEC1	C to T	0.0272281	E- mRna delivery			SRR11535273	BE4-SsAPOBEC3B	C to T	0.00596023	E - Plasmid delivery
SRR11535363	BE4-rAPOBEC1	C to T	0.0289429	E- mRna delivery			SRR11535373	BE4-SsAPOBEC3B	C to T	0.00597011	E - Plasmid delivery
SRR11535300	BE4-RrA3F	C to T	0.0270321	E- mRna delivery			SRR11535374	BE4-SsAPOBEC3B	C to T	0.00577092	E - Plasmid delivery
SRR11535318	BE4-RrA3F	C to T	0.0240303	E- mRna delivery			SRR11535375	BE4-SsAPOBEC3B	C to T	0.00604022	E - Plasmid delivery
SRR11535301	BE4-RrA3F	C to T	0.0265133	E- mRna delivery			SRR11535376	BE4-SsAPOBEC3B	C to T	0.0062531	E - Plasmid delivery
SRR11535320	BE4-RrA3F	C to T	0.0235183	E- mRna delivery			SRR11535377	BE4-SsAPOBEC3B	C to T	0.00641947	E - Plasmid delivery
SRR11535325	BE4-RrA3F	C to T	0.0291343	E- mRna delivery			SRR11535378	BE4-SsAPOBEC3B	C to T	0.00651917	E - Plasmid delivery
SRR11535317	BE4-RrA3F	C to T	0.0236512	E- mRna delivery			SRR11535379	BE4-SsAPOBEC3B	C to T	0.00588835	E - Plasmid delivery
SRR11535313	BE4-RrA3F	C to T	0.0242669	E- mRna delivery			SRR11535380	BE4-SsAPOBEC3B	C to T	0.00620829	E - Plasmid delivery
SRR11535310	BE4-RrA3F	C to T	0.0263858	E- mRna delivery			SRR11535381	BE4-SsAPOBEC3B	C to T	0.00634479	E - Plasmid delivery
SRR11535326	BE4-RrA3F	C to T	0.0289308	E- mRna delivery			SRR11535383	BE4-SsAPOBEC3B	C to T	0.00601162	E - Plasmid delivery
SRR11535327	BE4-RrA3F	C to T	0.0291835	E- mRna delivery			SRR11535384	BE4-SsAPOBEC3B	C to T	0.00606556	E - Plasmid delivery
SRR11535312	BE4-RrA3F	C to T	0.0242254	E- mRna delivery			SRR11535255	Cas9	C to T	0.00538706	E - Plasmid delivery
SRR11535324	BE4-RrA3F	C to T	0.0236994	E- mRna delivery			SRR11535256	Cas9	C to T	0.00554145	E - Plasmid delivery
SRR11535299	BE4-RrA3F	C to T	0.0265845	E- mRna delivery			SRR11535257	Cas9	C to T	0.00534529	E - Plasmid delivery
SRR11535316	BE4-RrA3F	C to T	0.0243945	E- mRna delivery			SRR11535258	Cas9	C to T	0.00563079	E - Plasmid delivery
SRR11535311	BE4-RrA3F	C to T	0.0274019	E- mRna delivery			SRR11535259	Cas9	C to T	0.00547328	E - Plasmid delivery
SRR11535306	BE4-RrA3F	C to T	0.0264	E- mRna delivery			SRR11535260	Cas9	C to T	0.00557936	E - Plasmid delivery
SRR11535323	BE4-RrA3F	C to T	0.0236349	E- mRna delivery			SRR11535262	Cas9	C to T	0.00551136	E - Plasmid delivery
SRR11535329	BE4-RrA3F	C to T	0.0290871	E- mRna delivery			SRR11535263	Cas9	C to T	0.00556689	E - Plasmid delivery
SRR11535314	BE4-RrA3F	C to T	0.0242269	E- mRna delivery			SRR11535264	Cas9	C to T	0.00565312	E - Plasmid delivery
SRR11535331	BE4-RrA3F	C to T	0.0295299	E- mRna delivery			SRR11535265	Cas9	C to T	0.00577948	E - Plasmid delivery
SRR11535303	BE4-RrA3F	C to T	0.0266945	E- mRna delivery			SRR11535266	Cas9	C to T	0.00564569	E - Plasmid delivery
SRR11535321	BE4-RrA3F	C to T	0.0233254	E- mRna delivery			SRR11535267	Cas9	C to T	0.00592815	E - Plasmid delivery
SRR11535322	BE4-RrA3F	C to T	0.0241232	E- mRna delivery			SRR11535578	Cas9	C to T	0.0055951	E - Plasmid delivery
SRR11535304	BE4-RrA3F	C to T	0.0271637	E- mRna delivery			SRR11535579	Cas9	C to T	0.00582077	E - Plasmid delivery
SRR11535305	BE4-RrA3F	C to T	0.0272634	E- mRna delivery			SRR11535580	Cas9	C to T	0.00540195	E - Plasmid delivery
SRR11535328	BE4-RrA3F	C to T	0.0290874	E- mRna delivery			SRR11535581	Cas9	C to T	0.00576527	E - Plasmid delivery
SRR11535315	BE4-RrA3F	C to T	0.0244239	E- mRna delivery			SRR11535631	Cas9	C to T	0.00589099	E - Plasmid delivery
SRR11535302	BE4-RrA3F	C to T	0.0263801	E- mRna delivery			SRR11535632	Cas9	C to T	0.00566141	E - Plasmid delivery
SRR11535309	BE4-RrA3F	C to T	0.0268566	E- mRna delivery			SRR11535633	Cas9	C to T	0.00587708	E - Plasmid delivery
SRR11535336	BE4-RrA3F F130L	C to T	0.0267085	E- mRna delivery			SRR11535634	Cas9	C to T	0.00573269	E - Plasmid delivery
SRR11535344	BE4-RrA3F F130L	C to T	0.0272183	E- mRna delivery			SRR11535561	NC	C to T	0.00569917	E - Plasmid delivery
SRR11535364	BE4-RrA3F F130L	C to T	0.0281876	E- mRna delivery			SRR11535562	NC	C to T	0.00589752	E - Plasmid delivery
SRR11535360	BE4-RrA3F F130L	C to T	0.0281594	E- mRna delivery			SRR11535563	NC	C to T	0.0056428	E - Plasmid delivery
SRR11535354	BE4-RrA3F F130L	C to T	0.0278304	E- mRna delivery			SRR11535564	NC	C to T	0.0056599	E - Plasmid delivery
SRR11535349	BE4-RrA3F F130L	C to T	0.0288512	E- mRna delivery			SRR11535565	NC	C to T	0.00571039	E - Plasmid delivery
SRR11535332	BE4-RrA3F F130L	C to T	0.0263197	E- mRna delivery			SRR11535566	NC	C to T	0.00584282	E - Plasmid delivery
SRR11535346	BE4-RrA3F F130L	C to T	0.0287013	E- mRna delivery			SRR11535567	NC	C to T	0.00578002	E - Plasmid delivery
SRR11535335	BE4-RrA3F F130L	C to T	0.0265524	E- mRna delivery			SRR11535568	NC	C to T	0.00584975	E - Plasmid delivery
SRR11535340	BE4-RrA3F F130L	C to T	0.02663	E- mRna delivery			SRR11535569	NC	C to T	0.00545404	E - Plasmid delivery
SRR11535355	BE4-RrA3F F130L	C to T	0.0280025	E- mRna delivery			SRR11535570	NC	C to T	0.00508797	E - Plasmid delivery
SRR11535343	BE4-RrA3F F130L	C to T	0.0268519	E- mRna delivery			SRR11535572	NC	C to T	0.00552223	E - Plasmid delivery
SRR11535348	BE4-RrA3F F130L	C to T	0.0290244	E- mRna delivery			SRR11535573	NC	C to T	0.00536084	E - Plasmid delivery
SRR11535350	BE4-RrA3F F130L	C to T	0.0295766	E- mRna delivery			SRR11535574	NC	C to T	0.00549543	E - Plasmid delivery
SRR11535357	BE4-RrA3F F130L	C to T	0.0275945	E- mRna delivery			SRR11535575	NC	C to T	0.00553985	E - Plasmid delivery
SRR11535361	BE4-RrA3F F130L	C to T	0.027951	E- mRna delivery			SRR11535576	NC	C to T	0.00579714	E - Plasmid delivery
SRR11535358	BE4-RrA3F F130L	C to T	0.0281081	E- mRna delivery			SRR11535577	NC	C to T	0.00572242	E - Plasmid delivery
SRR11535333	BE4-RrA3F F130L	C to T	0.0258467	E- mRna delivery
SRR11535362	BE4-RrA3F F130L	C to T	0.028696	E- mRna delivery
SRR11535347	BE4-RrA3F F130L	C to T	0.0287701	E- mRna delivery
SRR11535342	BE4-RrA3F F130L	C to T	0.0262337	E- mRna delivery
SRR11535351	BE4-RrA3F F130L	C to T	0.0276187	E- mRna delivery
SRR11535353	BE4-RrA3F F130L	C to T	0.0275524	E- mRna delivery
SRR11535338	BE4-RrA3F F130L	C to T	0.0267052	E- mRna delivery
SRR11535337	BE4-RrA3F F130L	C to T	0.026334	E- mRna delivery
SRR11535339	BE4-RrA3F F130L	C to T	0.0264672	E- mRna delivery
SRR11535345	BE4-RrA3F F130L	C to T	0.0295181	E- mRna delivery
SRR11535359	BE4-RrA3F F130L	C to T	0.0273535	E- mRna delivery
SRR11535356	BE4-RrA3F F130L	C to T	0.0280293	E- mRna delivery
SRR11535334	BE4-RrA3F F130L	C to T	0.0260514	E- mRna delivery
SRR11535426	BE4-SsAPOBEC3B	C to T	0.0263969	E- mRna delivery
SRR11535442	BE4-SsAPOBEC3B	C to T	0.0293314	E- mRna delivery
SRR11535441	BE4-SsAPOBEC3B	C to T	0.0293587	E- mRna delivery
SRR11535435	BE4-SsAPOBEC3B	C to T	0.0291118	E- mRna delivery
SRR11535443	BE4-SsAPOBEC3B	C to T	0.0291594	E- mRna delivery
SRR11535438	BE4-SsAPOBEC3B	C to T	0.0289108	E- mRna delivery
SRR11535432	BE4-SsAPOBEC3B	C to T	0.0291716	E- mRna delivery
SRR11535429	BE4-SsAPOBEC3B	C to T	0.0264719	E- mRna delivery
SRR11535436	BE4-SsAPOBEC3B	C to T	0.028646	E- mRna delivery
SRR11535430	BE4-SsAPOBEC3B	C to T	0.0264925	E- mRna delivery
SRR11535428	BE4-SsAPOBEC3B	C to T	0.0267475	E- mRna delivery
SRR11535444	BE4-SsAPOBEC3B	C to T	0.0299464	E- mRna delivery
SRR11535439	BE4-SsAPOBEC3B	C to T	0.028886	E- mRna delivery
SRR11535425	BE4-SsAPOBEC3B	C to T	0.0261265	E- mRna delivery
SRR11535433	BE4-SsAPOBEC3B	C to T	0.0291562	E- mRna delivery
SRR11535440	BE4-SsAPOBEC3B	C to T	0.0289563	E- mRna delivery
SRR11535437	BE4-SsAPOBEC3B	C to T	0.0293816	E- mRna delivery
SRR11535431	BE4-SsAPOBEC3B	C to T	0.0291247	E- mRna delivery
SRR11535427	BE4-SsAPOBEC3B	C to T	0.0263503	E- mRna delivery
SRR11535415	BE4-SsAPOBEC3B R54Q	C to T	0.0237707	E- mRna delivery
SRR11535403	BE4-SsAPOBEC3B R54Q	C to T	0.0223182	E- mRna delivery
SRR11535410	BE4-SsAPOBEC3B R54Q	C to T	0.0279928	E- mRna delivery
SRR11535405	BE4-SsAPOBEC3B R54Q	C to T	0.0277886	E- mRna delivery
SRR11535369	BE4-SsAPOBEC3B R54Q	C to T	0.0278271	E- mRna delivery
SRR11535422	BE4-SsAPOBEC3B R54Q	C to T	0.0309742	E- mRna delivery
SRR11535411	BE4-SsAPOBEC3B R54Q	C to T	0.0239332	E- mRna delivery
SRR11535424	BE4-SsAPOBEC3B R54Q	C to T	0.0312249	E- mRna delivery
SRR11535397	BE4-SsAPOBEC3B R54Q	C to T	0.0278463	E- mRna delivery
SRR11535413	BE4-SsAPOBEC3B R54Q	C to T	0.0237001	E- mRna delivery
SRR11535409	BE4-SsAPOBEC3B R54Q	C to T	0.0272862	E- mRna delivery
SRR11535419	BE4-SsAPOBEC3B R54Q	C to T	0.03103	E- mRna delivery
SRR11535421	BE4-SsAPOBEC3B R54Q	C to T	0.0308877	E- mRna delivery
SRR11535408	BE4-SsAPOBEC3B R54Q	C to T	0.0279501	E- mRna delivery
SRR11535400	BE4-SsAPOBEC3B R54Q	C to T	0.0218622	E- mRna delivery
SRR11535407	BE4-SsAPOBEC3B R54Q	C to T	0.0281344	E- mRna delivery
SRR11535416	BE4-SsAPOBEC3B R54Q	C to T	0.023821	E- mRna delivery
SRR11535402	BE4-SsAPOBEC3B R54Q	C to T	0.0222459	E- mRna delivery
SRR11535418	BE4-SsAPOBEC3B R54Q	C to T	0.0309205	E- mRna delivery
SRR11535399	BE4-SsAPOBEC3B R54Q	C to T	0.0223658	E- mRna delivery
SRR11535365	BE4-SsAPOBEC3B R54Q	C to T	0.0280435	E- mRna delivery
SRR11535366	BE4-SsAPOBEC3B R54Q	C to T	0.027709	E- mRna delivery
SRR11535398	BE4-SsAPOBEC3B R54Q	C to T	0.0226371	E- mRna delivery
SRR11535417	BE4-SsAPOBEC3B R54Q	C to T	0.0239267	E- mRna delivery
SRR11535367	BE4-SsAPOBEC3B R54Q	C to T	0.0274709	E- mRna delivery
SRR11535404	BE4-SsAPOBEC3B R54Q	C to T	0.0222708	E- mRna delivery
SRR11535414	BE4-SsAPOBEC3B R54Q	C to T	0.0237727	E- mRna delivery
SRR11535406	BE4-SsAPOBEC3B R54Q	C to T	0.0274331	E- mRna delivery
SRR11535420	BE4-SsAPOBEC3B R54Q	C to T	0.0309359	E- mRna delivery
SRR11535368	BE4-SsAPOBEC3B R54Q	C to T	0.027527	E- mRna delivery
SRR11535280	None	C to T	0.0284367	E- mRna delivery
SRR11535277	None	C to T	0.0260138	E- mRna delivery
SRR11535290	None	C to T	0.0245886	E- mRna delivery
SRR11535278	None	C to T	0.0253894	E- mRna delivery
SRR11535293	None	C to T	0.0256568	E- mRna delivery
SRR11535282	None	C to T	0.028269	E- mRna delivery
SRR11535286	None	C to T	0.0247048	E- mRna delivery
SRR11535275	None	C to T	0.0248559	E- mRna delivery
SRR11535279	None	C to T	0.0291629	E- mRna delivery
SRR11535291	None	C to T	0.0247482	E- mRna delivery
SRR11535295	None	C to T	0.0255253	E- mRna delivery
SRR11535298	None	C to T	0.0252577	E- mRna delivery
SRR11535292	None	C to T	0.0255085	E- mRna delivery
SRR11535288	None	C to T	0.024564	E- mRna delivery
SRR11535287	None	C to T	0.0249675	E- mRna delivery
SRR11535283	None	C to T	0.0288211	E- mRna delivery
SRR11535289	None	C to T	0.0247234	E- mRna delivery
SRR11535294	None	C to T	0.0257342	E- mRna delivery
SRR11535281	None	C to T	0.0279592	E- mRna delivery
SRR11535284	None	C to T	0.0288256	E- mRna delivery
SRR11535297	None	C to T	0.0254145	E- mRna delivery
SRR11535276	None	C to T	0.0253993	E- mRna delivery

## Sheet: Supp. table 5
Table S5: p-values all tests presented in Fig. 3							Statistical comparison of index values between base-editor samples and controls.
P-value, t-statistic (t), degrees of freedom (df) and confidance intervals (CI) were calculated using R "t.test" function (two-sided unpaired t-test), comparing log(index).
Accordingly, the confidence interval and the effect size shown are for the difference in mean(log(index)) between sample and control. Hedges' g effect size was calculated using R.
CDS											Filtered CDS
Name	Number of samples	p-value	t	df	Cl lower	CI upper	Effect size	Dataset			Name	Number of samples	p-value	t	df	Cl lower	CI upper	Effect size	Dataset
Cre	4							I			Cre	4							I
Cas9	4	0.611428	-0.560253	3.26907	-0.0490154	0.0337573	-0.360337	I			Cas9	4	0.806076	-0.2592	4.87162	-0.0716473	0.0586164	-0.159376	I
Cas9-Tyr-A	4	0.00228059	-7.60136	3.65932	-0.0925787	-0.0416842	-4.88896	I			Cas9-Tyr-A	4	0.425295	0.857421	5.7861	-0.0267206	0.0551532	0.527207	I
Cas9-Tyr-B	3	0.288405	-1.41378	2.08227	-0.111192	0.05462	-0.92348	I			Cas9-Tyr-B	3	0.959873	0.0530144	4.75898	-0.0388444	0.040455	0.0340972	I
Cas9-Tyr-C	2	0.0362331	9.62097	1.30127	0.0169314	0.13582	6.38742	I			Cas9-Tyr-C	2	0.000503004	10.7898	3.86211	0.124877	0.213079	7.47539	I
BE3	4	0.126943	1.94693	3.809	-0.00708343	0.0382391	1.25221	I			BE3	4	0.000913855	6.29173	5.70097	0.0622742	0.14322	3.86863	I
BE3-Tyr-C	4	0.00747781	5.75483	3.37665	0.0319713	0.101158	3.70133	I			BE3-Tyr-C	4	0.000157856	8.42755	5.95921	0.112975	0.205637	5.18189	I
BE3-Tyr-D	4	2.01256e-05	16.6775	4.78404	0.0734863	0.100704	10.7265	I			BE3-Tyr-D	4	0.000113843	13.6521	4.24901	0.154549	0.231224	8.39437	I
ABE7.10	4	0.656773	0.496799	2.7123	-0.0983147	0.13217	0.319526	I			ABE7.10	4	0.0325169	3.15846	4.15118	0.0149013	0.208452	1.94206	I
ABE7.10-Tyr-E	4	0.235886	1.44718	3.29206	-0.0959293	0.27151	0.945295	I			ABE7.10-Tyr-E	4	0.0580908	2.45504	4.94866	-0.00768515	0.313012	1.50954	I
Parents	9	0.0840475	1.88885	11.6528	-0.00396445	0.0543582	0.787955	J			none	9	3.07029e-23	-79.4056	16.9492	-0.926258	-0.878299	-35.653	J
Control	13							J			non-injected	13							J
ABE	13	0.432344	0.798641	23.9594	-0.0104968	0.0237462	0.303361	J			ABE edited	13	0.823832	0.225201	22.7696	-0.0226235	0.0281475	0.0871804	J
BE4	8	0.88343	-0.148819	17.1784	-0.0181232	0.0157332	-0.0641981	J			CBE edited	8	0.906076	-0.119819	16.4649	-0.0247016	0.0220529	-0.0564887	J
BE4	7	0.0198517	2.78132	9.74942	0.0224527	0.206551	1.43942	L			BE4	7	0.029287	2.59131	8.94672	0.0264868	0.393175	1.34109	L
YE1-BE4	7	0.741392	0.339779	9.53107	-0.0773156	0.10492	0.175847	L			YE1-BE4	7	0.745241	0.333728	10.3602	-0.16701	0.226179	0.172716	L
nCas9	6							L			nCas9	6							L
Parent	1							L			Parent	1							L

## Sheet: Supp. table 6
Table S6: Data presented in fig. S2			Number of hyper-editing sites found in each RNA-seq sample
A-to-G							C-to-T
Run	Annotation	Name	DatasFt	Total HE sites			Run	Annotation	Name	Eataset	Total HE sites
SRR10523701	Other	RESCUE+S375N	A	624			SRR10523701	Other	RESCUE+S375N	A	45
SRR10523701	Intronic	RESCUE+S375N	A	584			SRR10523701	Intronic	RESCUE+S375N	A	43
SRR10523701	UTR3	RESCUE+S375N	A	2004			SRR10523701	UTR3	RESCUE+S375N	A	0
SRR10523701	UTR5	RESCUE+S375N	A	80			SRR10523701	UTR5	RESCUE+S375N	A	0
SRR10523701	CDS_syn	RESCUE+S375N	A	889			SRR10523701	CDS_syn	RESCUE+S375N	A	3
SRR10523701	CDS_nonsyn	RESCUE+S375N	A	3083			SRR10523701	CDS_nonsyn	RESCUE+S375N	A	2
SRR10523702	Intronic	REPAIRv1(N81S)	A	551			SRR10523702	Intronic	REPAIRv1(N81S)	A	72
SRR10523702	UTR3	REPAIRv1(N81S)	A	1676			SRR10523702	UTR3	REPAIRv1(N81S)	A	0
SRR10523702	UTR5	REPAIRv1(N81S)	A	96			SRR10523702	UTR5	REPAIRv1(N81S)	A	0
SRR10523702	Other	REPAIRv1(N81S)	A	599			SRR10523702	Other	REPAIRv1(N81S)	A	51
SRR10523702	CDS_nonsyn	REPAIRv1(N81S)	A	3196			SRR10523702	CDS_nonsyn	REPAIRv1(N81S)	A	0
SRR10523702	CDS_syn	REPAIRv1(N81S)	A	909			SRR10523702	CDS_syn	REPAIRv1(N81S)	A	0
SRR10523705	Intronic	RESCUE+N473I	A	480			SRR10523705	Intronic	RESCUE+N473I	A	50
SRR10523705	UTR3	RESCUE+N473I	A	1114			SRR10523705	UTR3	RESCUE+N473I	A	9
SRR10523705	Other	RESCUE+N473I	A	530			SRR10523705	Other	RESCUE+N473I	A	53
SRR10523705	CDS_nonsyn	RESCUE+N473I	A	1938			SRR10523705	CDS_nonsyn	RESCUE+N473I	A	2
SRR10523705	UTR5	RESCUE+N473I	A	85			SRR10523705	UTR5	RESCUE+N473I	A	0
SRR10523705	CDS_syn	RESCUE+N473I	A	591			SRR10523705	CDS_syn	RESCUE+N473I	A	4
SRR10523706	Intronic	RESCUE+S375A	A	271			SRR10523706	Intronic	RESCUE+S375A	A	54
SRR10523706	Other	RESCUE+S375A	A	329			SRR10523706	Other	RESCUE+S375A	A	51
SRR10523706	CDS_nonsyn	RESCUE+S375A	A	72			SRR10523706	CDS_nonsyn	RESCUE+S375A	A	0
SRR10523706	UTR3	RESCUE+S375A	A	131			SRR10523706	UTR3	RESCUE+S375A	A	8
SRR10523706	UTR5	RESCUE+S375A	A	8			SRR10523706	UTR5	RESCUE+S375A	A	0
SRR10523706	CDS_syn	RESCUE+S375A	A	33			SRR10523706	CDS_syn	RESCUE+S375A	A	0
SRR10523707	Other	RESCUE+S375C	A	294			SRR10523707	Other	RESCUE+S375C	A	18
SRR10523707	Intronic	RESCUE+S375C	A	290			SRR10523707	Intronic	RESCUE+S375C	A	42
SRR10523707	UTR3	RESCUE+S375C	A	185			SRR10523707	UTR3	RESCUE+S375C	A	0
SRR10523707	UTR5	RESCUE+S375C	A	15			SRR10523707	UTR5	RESCUE+S375C	A	0
SRR10523707	CDS_syn	RESCUE+S375C	A	101			SRR10523707	CDS_syn	RESCUE+S375C	A	0
SRR10523707	CDS_nonsyn	RESCUE+S375C	A	300			SRR10523707	CDS_nonsyn	RESCUE+S375C	A	0
SRR10523709	Intronic	REPAIRv1(N81S)	A	652			SRR10523709	Intronic	REPAIRv1(N81S)	A	43
SRR10523709	UTR3	REPAIRv1(N81S)	A	1744			SRR10523709	UTR3	REPAIRv1(N81S)	A	3
SRR10523709	UTR5	REPAIRv1(N81S)	A	120			SRR10523709	UTR5	REPAIRv1(N81S)	A	0
SRR10523709	Other	REPAIRv1(N81S)	A	721			SRR10523709	Other	REPAIRv1(N81S)	A	50
SRR10523709	CDS_nonsyn	REPAIRv1(N81S)	A	3521			SRR10523709	CDS_nonsyn	REPAIRv1(N81S)	A	0
SRR10523709	CDS_syn	REPAIRv1(N81S)	A	1055			SRR10523709	CDS_syn	REPAIRv1(N81S)	A	0
SRR10523710	Intronic	REPAIRv1(X85W)	A	1853			SRR10523710	Intronic	REPAIRv1(X85W)	A	27
SRR10523710	UTR3	REPAIRv1(X85W)	A	9610			SRR10523710	UTR3	REPAIRv1(X85W)	A	3
SRR10523710	Other	REPAIRv1(X85W)	A	1823			SRR10523710	Other	REPAIRv1(X85W)	A	19
SRR10523710	CDS_nonsyn	REPAIRv1(X85W)	A	15841			SRR10523710	CDS_nonsyn	REPAIRv1(X85W)	A	0
SRR10523710	UTR5	REPAIRv1(X85W)	A	635			SRR10523710	UTR5	REPAIRv1(X85W)	A	0
SRR10523710	CDS_syn	REPAIRv1(X85W)	A	5031			SRR10523710	CDS_syn	REPAIRv1(X85W)	A	0
SRR10523711	Intronic	REPAIRv2	A	295			SRR10523711	Intronic	REPAIRv2	A	62
SRR10523711	Other	REPAIRv2	A	302			SRR10523711	Other	REPAIRv2	A	35
SRR10523711	CDS_nonsyn	REPAIRv2	A	76			SRR10523711	CDS_nonsyn	REPAIRv2	A	0
SRR10523711	UTR3	REPAIRv2	A	96			SRR10523711	UTR3	REPAIRv2	A	3
SRR10523711	UTR5	REPAIRv2	A	6			SRR10523711	UTR5	REPAIRv2	A	0
SRR10523711	CDS_syn	REPAIRv2	A	40			SRR10523711	CDS_syn	REPAIRv2	A	0
SRR10523712	Other	REPAIRv1(X85W)	A	2263			SRR10523712	Other	REPAIRv1(X85W)	A	49
SRR10523712	Intronic	REPAIRv1(X85W)	A	2095			SRR10523712	Intronic	REPAIRv1(X85W)	A	44
SRR10523712	UTR3	REPAIRv1(X85W)	A	13145			SRR10523712	UTR3	REPAIRv1(X85W)	A	6
SRR10523712	UTR5	REPAIRv1(X85W)	A	756			SRR10523712	UTR5	REPAIRv1(X85W)	A	0
SRR10523712	CDS_syn	REPAIRv1(X85W)	A	6734			SRR10523712	CDS_syn	REPAIRv1(X85W)	A	0
SRR10523712	CDS_nonsyn	REPAIRv1(X85W)	A	19996			SRR10523712	CDS_nonsyn	REPAIRv1(X85W)	A	0
SRR10523713	Intronic	RESCUE	A	1227			SRR10523713	Intronic	RESCUE	A	68
SRR10523713	UTR3	RESCUE	A	5263			SRR10523713	UTR3	RESCUE	A	10
SRR10523713	UTR5	RESCUE	A	287			SRR10523713	UTR5	RESCUE	A	0
SRR10523713	Other	RESCUE	A	1182			SRR10523713	Other	RESCUE	A	89
SRR10523713	CDS_nonsyn	RESCUE	A	9595			SRR10523713	CDS_nonsyn	RESCUE	A	13
SRR10523713	CDS_syn	RESCUE	A	2966			SRR10523713	CDS_syn	RESCUE	A	6
SRR10523714	Intronic	RESCUE+N473I	A	464			SRR10523714	Intronic	RESCUE+N473I	A	63
SRR10523714	UTR3	RESCUE+N473I	A	1033			SRR10523714	UTR3	RESCUE+N473I	A	0
SRR10523714	Other	RESCUE+N473I	A	472			SRR10523714	Other	RESCUE+N473I	A	47
SRR10523714	CDS_nonsyn	RESCUE+N473I	A	2028			SRR10523714	CDS_nonsyn	RESCUE+N473I	A	1
SRR10523714	UTR5	RESCUE+N473I	A	86			SRR10523714	UTR5	RESCUE+N473I	A	0
SRR10523714	CDS_syn	RESCUE+N473I	A	584			SRR10523714	CDS_syn	RESCUE+N473I	A	2
SRR10523716	Intronic	RESCUE+N473I	A	498			SRR10523716	Intronic	RESCUE+N473I	A	51
SRR10523716	Other	RESCUE+N473I	A	500			SRR10523716	Other	RESCUE+N473I	A	35
SRR10523716	CDS_nonsyn	RESCUE+N473I	A	2243			SRR10523716	CDS_nonsyn	RESCUE+N473I	A	0
SRR10523716	UTR3	RESCUE+N473I	A	1289			SRR10523716	UTR3	RESCUE+N473I	A	0
SRR10523716	UTR5	RESCUE+N473I	A	73			SRR10523716	UTR5	RESCUE+N473I	A	3
SRR10523716	CDS_syn	RESCUE+N473I	A	662			SRR10523716	CDS_syn	RESCUE+N473I	A	0
SRR10523717	Other	RESCUE+S375A	A	292			SRR10523717	Other	RESCUE+S375A	A	42
SRR10523717	Intronic	RESCUE+S375A	A	297			SRR10523717	Intronic	RESCUE+S375A	A	28
SRR10523717	UTR3	RESCUE+S375A	A	113			SRR10523717	UTR3	RESCUE+S375A	A	0
SRR10523717	UTR5	RESCUE+S375A	A	4			SRR10523717	UTR5	RESCUE+S375A	A	3
SRR10523717	CDS_syn	RESCUE+S375A	A	37			SRR10523717	CDS_syn	RESCUE+S375A	A	0
SRR10523717	CDS_nonsyn	RESCUE+S375A	A	56			SRR10523717	CDS_nonsyn	RESCUE+S375A	A	0
SRR10523718	CDS_nonsyn	RESCUE+S375C	A	322			SRR10523718	CDS_nonsyn	RESCUE+S375C	A	0
SRR10523718	UTR3	RESCUE+S375C	A	259			SRR10523718	UTR3	RESCUE+S375C	A	3
SRR10523718	Other	RESCUE+S375C	A	305			SRR10523718	Other	RESCUE+S375C	A	25
SRR10523718	Intronic	RESCUE+S375C	A	291			SRR10523718	Intronic	RESCUE+S375C	A	51
SRR10523718	UTR5	RESCUE+S375C	A	28			SRR10523718	UTR5	RESCUE+S375C	A	0
SRR10523718	CDS_syn	RESCUE+S375C	A	117			SRR10523718	CDS_syn	RESCUE+S375C	A	0
SRR10523719	Intronic	RESCUE+S375N	A	622			SRR10523719	Intronic	RESCUE+S375N	A	67
SRR10523719	UTR5	RESCUE+S375N	A	118			SRR10523719	UTR5	RESCUE+S375N	A	0
SRR10523719	UTR3	RESCUE+S375N	A	2192			SRR10523719	UTR3	RESCUE+S375N	A	6
SRR10523719	CDS_nonsyn	RESCUE+S375N	A	3409			SRR10523719	CDS_nonsyn	RESCUE+S375N	A	10
SRR10523719	CDS_syn	RESCUE+S375N	A	1055			SRR10523719	CDS_syn	RESCUE+S375N	A	0
SRR10523719	Other	RESCUE+S375N	A	702			SRR10523719	Other	RESCUE+S375N	A	28
SRR10523721	Other	RESCUE	A	1332			SRR10523721	Other	RESCUE	A	67
SRR10523721	Intronic	RESCUE	A	1304			SRR10523721	Intronic	RESCUE	A	64
SRR10523721	UTR5	RESCUE	A	368			SRR10523721	UTR5	RESCUE	A	0
SRR10523721	CDS_syn	RESCUE	A	3452			SRR10523721	CDS_syn	RESCUE	A	3
SRR10523721	CDS_nonsyn	RESCUE	A	10820			SRR10523721	CDS_nonsyn	RESCUE	A	7
SRR10523721	UTR3	RESCUE	A	6265			SRR10523721	UTR3	RESCUE	A	0
SRR10523722	Other	REPAIRv2	A	287			SRR10523722	Other	REPAIRv2	A	31
SRR10523722	Intronic	REPAIRv2	A	255			SRR10523722	Intronic	REPAIRv2	A	39
SRR10523722	CDS_syn	REPAIRv2	A	27			SRR10523722	CDS_syn	REPAIRv2	A	0
SRR10523722	CDS_nonsyn	REPAIRv2	A	58			SRR10523722	CDS_nonsyn	REPAIRv2	A	0
SRR10523722	UTR5	REPAIRv2	A	7			SRR10523722	UTR5	REPAIRv2	A	0
SRR10523722	UTR3	REPAIRv2	A	70			SRR10523722	UTR3	REPAIRv2	A	0
SRR10523724	Other	RESCUE	A	1489			SRR10523724	Other	RESCUE	A	97
SRR10523724	CDS_syn	RESCUE	A	3464			SRR10523724	CDS_syn	RESCUE	A	3
SRR10523724	CDS_nonsyn	RESCUE	A	11642			SRR10523724	CDS_nonsyn	RESCUE	A	11
SRR10523724	Intronic	RESCUE	A	1607			SRR10523724	Intronic	RESCUE	A	109
SRR10523724	UTR5	RESCUE	A	356			SRR10523724	UTR5	RESCUE	A	0
SRR10523724	UTR3	RESCUE	A	6758			SRR10523724	UTR3	RESCUE	A	13
SRR10523725	CDS_syn	RESCUE+N473I	A	618			SRR10523725	CDS_syn	RESCUE+N473I	A	5
SRR10523725	Other	RESCUE+N473I	A	524			SRR10523725	Other	RESCUE+N473I	A	40
SRR10523725	Intronic	RESCUE+N473I	A	449			SRR10523725	Intronic	RESCUE+N473I	A	59
SRR10523725	UTR5	RESCUE+N473I	A	51			SRR10523725	UTR5	RESCUE+N473I	A	0
SRR10523725	UTR3	RESCUE+N473I	A	1036			SRR10523725	UTR3	RESCUE+N473I	A	0
SRR10523725	CDS_nonsyn	RESCUE+N473I	A	2026			SRR10523725	CDS_nonsyn	RESCUE+N473I	A	4
SRR10523726	Other	RESCUE	A	1427			SRR10523726	Other	RESCUE	A	113
SRR10523726	Intronic	RESCUE	A	1363			SRR10523726	Intronic	RESCUE	A	99
SRR10523726	UTR5	RESCUE	A	301			SRR10523726	UTR5	RESCUE	A	0
SRR10523726	CDS_syn	RESCUE	A	3450			SRR10523726	CDS_syn	RESCUE	A	5
SRR10523726	CDS_nonsyn	RESCUE	A	11303			SRR10523726	CDS_nonsyn	RESCUE	A	8
SRR10523726	UTR3	RESCUE	A	6587			SRR10523726	UTR3	RESCUE	A	10
SRR10523727	Other	RESCUE+N473I	A	455			SRR10523727	Other	RESCUE+N473I	A	38
SRR10523727	Intronic	RESCUE+N473I	A	400			SRR10523727	Intronic	RESCUE+N473I	A	57
SRR10523727	CDS_syn	RESCUE+N473I	A	460			SRR10523727	CDS_syn	RESCUE+N473I	A	4
SRR10523727	CDS_nonsyn	RESCUE+N473I	A	1607			SRR10523727	CDS_nonsyn	RESCUE+N473I	A	4
SRR10523727	UTR5	RESCUE+N473I	A	35			SRR10523727	UTR5	RESCUE+N473I	A	0
SRR10523727	UTR3	RESCUE+N473I	A	892			SRR10523727	UTR3	RESCUE+N473I	A	9
SRR10523728	Other	RESCUE+S375A	A	362			SRR10523728	Other	RESCUE+S375A	A	45
SRR10523728	CDS_syn	RESCUE+S375A	A	25			SRR10523728	CDS_syn	RESCUE+S375A	A	3
SRR10523728	CDS_nonsyn	RESCUE+S375A	A	60			SRR10523728	CDS_nonsyn	RESCUE+S375A	A	4
SRR10523728	Intronic	RESCUE+S375A	A	326			SRR10523728	Intronic	RESCUE+S375A	A	39
SRR10523728	UTR5	RESCUE+S375A	A	7			SRR10523728	UTR5	RESCUE+S375A	A	0
SRR10523728	UTR3	RESCUE+S375A	A	151			SRR10523728	UTR3	RESCUE+S375A	A	3
SRR10523729	CDS_syn	RESCUE+S375C	A	85			SRR10523729	CDS_syn	RESCUE+S375C	A	1
SRR10523729	Other	RESCUE+S375C	A	339			SRR10523729	Other	RESCUE+S375C	A	51
SRR10523729	Intronic	RESCUE+S375C	A	373			SRR10523729	Intronic	RESCUE+S375C	A	32
SRR10523729	UTR5	RESCUE+S375C	A	13			SRR10523729	UTR5	RESCUE+S375C	A	0
SRR10523729	UTR3	RESCUE+S375C	A	209			SRR10523729	UTR3	RESCUE+S375C	A	3
SRR10523729	CDS_nonsyn	RESCUE+S375C	A	291			SRR10523729	CDS_nonsyn	RESCUE+S375C	A	2
SRR10523730	Other	RESCUE+S375N	A	543			SRR10523730	Other	RESCUE+S375N	A	35
SRR10523730	Intronic	RESCUE+S375N	A	570			SRR10523730	Intronic	RESCUE+S375N	A	50
SRR10523730	UTR5	RESCUE+S375N	A	91			SRR10523730	UTR5	RESCUE+S375N	A	0
SRR10523730	CDS_syn	RESCUE+S375N	A	836			SRR10523730	CDS_syn	RESCUE+S375N	A	2
SRR10523730	CDS_nonsyn	RESCUE+S375N	A	2831			SRR10523730	CDS_nonsyn	RESCUE+S375N	A	0
SRR10523730	UTR3	RESCUE+S375N	A	1795			SRR10523730	UTR3	RESCUE+S375N	A	0
SRR10523731	Other	REPAIRv1(N81S)	A	543			SRR10523731	Other	REPAIRv1(N81S)	A	42
SRR10523731	Intronic	REPAIRv1(N81S)	A	472			SRR10523731	Intronic	REPAIRv1(N81S)	A	50
SRR10523731	CDS_syn	REPAIRv1(N81S)	A	640			SRR10523731	CDS_syn	REPAIRv1(N81S)	A	0
SRR10523731	CDS_nonsyn	REPAIRv1(N81S)	A	2110			SRR10523731	CDS_nonsyn	REPAIRv1(N81S)	A	0
SRR10523731	UTR5	REPAIRv1(N81S)	A	53			SRR10523731	UTR5	REPAIRv1(N81S)	A	0
SRR10523731	UTR3	REPAIRv1(N81S)	A	1239			SRR10523731	UTR3	REPAIRv1(N81S)	A	3
SRR10523732	Other	RESCUE+N473I	A	620			SRR10523732	Other	RESCUE+N473I	A	44
SRR10523732	UTR5	RESCUE+N473I	A	59			SRR10523732	UTR5	RESCUE+N473I	A	0
SRR10523732	CDS_syn	RESCUE+N473I	A	724			SRR10523732	CDS_syn	RESCUE+N473I	A	3
SRR10523732	Intronic	RESCUE+N473I	A	492			SRR10523732	Intronic	RESCUE+N473I	A	46
SRR10523732	UTR3	RESCUE+N473I	A	1246			SRR10523732	UTR3	RESCUE+N473I	A	3
SRR10523732	CDS_nonsyn	RESCUE+N473I	A	2345			SRR10523732	CDS_nonsyn	RESCUE+N473I	A	1
SRR10523733	UTR3	REPAIRv2	A	86			SRR10523733	UTR3	REPAIRv2	A	0
SRR10523733	CDS_nonsyn	REPAIRv2	A	51			SRR10523733	CDS_nonsyn	REPAIRv2	A	1
SRR10523733	CDS_syn	REPAIRv2	A	17			SRR10523733	CDS_syn	REPAIRv2	A	2
SRR10523733	Intronic	REPAIRv2	A	321			SRR10523733	Intronic	REPAIRv2	A	48
SRR10523733	Other	REPAIRv2	A	300			SRR10523733	Other	REPAIRv2	A	33
SRR10523733	UTR5	REPAIRv2	A	16			SRR10523733	UTR5	REPAIRv2	A	0
SRR10523734	Other	REPAIRv1(X85W)	A	1744			SRR10523734	Other	REPAIRv1(X85W)	A	28
SRR10523734	UTR5	REPAIRv1(X85W)	A	538			SRR10523734	UTR5	REPAIRv1(X85W)	A	0
SRR10523734	CDS_syn	REPAIRv1(X85W)	A	4650			SRR10523734	CDS_syn	REPAIRv1(X85W)	A	0
SRR10523734	Intronic	REPAIRv1(X85W)	A	1931			SRR10523734	Intronic	REPAIRv1(X85W)	A	62
SRR10523734	UTR3	REPAIRv1(X85W)	A	9766			SRR10523734	UTR3	REPAIRv1(X85W)	A	3
SRR10523734	CDS_nonsyn	REPAIRv1(X85W)	A	14054			SRR10523734	CDS_nonsyn	REPAIRv1(X85W)	A	0
SRR10523735	UTR5	RESCUE	A	296			SRR10523735	UTR5	RESCUE	A	0
SRR10523735	UTR3	RESCUE	A	6813			SRR10523735	UTR3	RESCUE	A	9
SRR10523735	Other	RESCUE	A	1544			SRR10523735	Other	RESCUE	A	115
SRR10523735	Intronic	RESCUE	A	1602			SRR10523735	Intronic	RESCUE	A	95
SRR10523735	CDS_syn	RESCUE	A	3639			SRR10523735	CDS_syn	RESCUE	A	12
SRR10523735	CDS_nonsyn	RESCUE	A	12066			SRR10523735	CDS_nonsyn	RESCUE	A	14
SRR10523736	UTR5	RESCUE+N473I	A	40			SRR10523736	UTR5	RESCUE+N473I	A	0
SRR10523736	Other	RESCUE+N473I	A	422			SRR10523736	Other	RESCUE+N473I	A	58
SRR10523736	Intronic	RESCUE+N473I	A	435			SRR10523736	Intronic	RESCUE+N473I	A	42
SRR10523736	UTR3	RESCUE+N473I	A	911			SRR10523736	UTR3	RESCUE+N473I	A	0
SRR10523736	CDS_syn	RESCUE+N473I	A	479			SRR10523736	CDS_syn	RESCUE+N473I	A	2
SRR10523736	CDS_nonsyn	RESCUE+N473I	A	1616			SRR10523736	CDS_nonsyn	RESCUE+N473I	A	0
SRR10523737	Other	RESCUE+S375A	A	312			SRR10523737	Other	RESCUE+S375A	A	50
SRR10523737	UTR5	RESCUE+S375A	A	0			SRR10523737	UTR5	RESCUE+S375A	A	0
SRR10523737	UTR3	RESCUE+S375A	A	88			SRR10523737	UTR3	RESCUE+S375A	A	6
SRR10523737	CDS_syn	RESCUE+S375A	A	27			SRR10523737	CDS_syn	RESCUE+S375A	A	2
SRR10523737	CDS_nonsyn	RESCUE+S375A	A	62			SRR10523737	CDS_nonsyn	RESCUE+S375A	A	0
SRR10523737	Intronic	RESCUE+S375A	A	235			SRR10523737	Intronic	RESCUE+S375A	A	59
SRR10523738	UTR5	RESCUE+S375C	A	25			SRR10523738	UTR5	RESCUE+S375C	A	0
SRR10523738	UTR3	RESCUE+S375C	A	284			SRR10523738	UTR3	RESCUE+S375C	A	0
SRR10523738	CDS_syn	RESCUE+S375C	A	91			SRR10523738	CDS_syn	RESCUE+S375C	A	2
SRR10523738	Other	RESCUE+S375C	A	313			SRR10523738	Other	RESCUE+S375C	A	36
SRR10523738	Intronic	RESCUE+S375C	A	403			SRR10523738	Intronic	RESCUE+S375C	A	41
SRR10523738	CDS_nonsyn	RESCUE+S375C	A	332			SRR10523738	CDS_nonsyn	RESCUE+S375C	A	3
SRR10523742	UTR5	REPAIRv1(X85W)	A	572			SRR10523742	UTR5	REPAIRv1(X85W)	A	0
SRR10523742	UTR3	REPAIRv1(X85W)	A	9987			SRR10523742	UTR3	REPAIRv1(X85W)	A	0
SRR10523742	Other	REPAIRv1(X85W)	A	1811			SRR10523742	Other	REPAIRv1(X85W)	A	26
SRR10523742	Intronic	REPAIRv1(X85W)	A	1907			SRR10523742	Intronic	REPAIRv1(X85W)	A	37
SRR10523742	CDS_syn	REPAIRv1(X85W)	A	5368			SRR10523742	CDS_syn	REPAIRv1(X85W)	A	0
SRR10523742	CDS_nonsyn	REPAIRv1(X85W)	A	16099			SRR10523742	CDS_nonsyn	REPAIRv1(X85W)	A	0
SRR10523743	UTR5	RESCUE+S375A	A	6			SRR10523743	UTR5	RESCUE+S375A	A	0
SRR10523743	Other	RESCUE+S375A	A	274			SRR10523743	Other	RESCUE+S375A	A	33
SRR10523743	Intronic	RESCUE+S375A	A	221			SRR10523743	Intronic	RESCUE+S375A	A	52
SRR10523743	UTR3	RESCUE+S375A	A	76			SRR10523743	UTR3	RESCUE+S375A	A	0
SRR10523743	CDS_syn	RESCUE+S375A	A	23			SRR10523743	CDS_syn	RESCUE+S375A	A	2
SRR10523743	CDS_nonsyn	RESCUE+S375A	A	49			SRR10523743	CDS_nonsyn	RESCUE+S375A	A	1
SRR10523744	Other	RESCUE	A	1669			SRR10523744	Other	RESCUE	A	116
SRR10523744	UTR5	RESCUE	A	469			SRR10523744	UTR5	RESCUE	A	5
SRR10523744	UTR3	RESCUE	A	7227			SRR10523744	UTR3	RESCUE	A	13
SRR10523744	CDS_syn	RESCUE	A	4015			SRR10523744	CDS_syn	RESCUE	A	2
SRR10523744	CDS_nonsyn	RESCUE	A	13096			SRR10523744	CDS_nonsyn	RESCUE	A	3
SRR10523744	Intronic	RESCUE	A	1484			SRR10523744	Intronic	RESCUE	A	135
SRR10523746	UTR5	RESCUE+S375A	A	10			SRR10523746	UTR5	RESCUE+S375A	A	0
SRR10523746	UTR3	RESCUE+S375A	A	117			SRR10523746	UTR3	RESCUE+S375A	A	2
SRR10523746	CDS_syn	RESCUE+S375A	A	32			SRR10523746	CDS_syn	RESCUE+S375A	A	2
SRR10523746	Other	RESCUE+S375A	A	323			SRR10523746	Other	RESCUE+S375A	A	31
SRR10523746	Intronic	RESCUE+S375A	A	257			SRR10523746	Intronic	RESCUE+S375A	A	49
SRR10523746	CDS_nonsyn	RESCUE+S375A	A	79			SRR10523746	CDS_nonsyn	RESCUE+S375A	A	1
SRR10523747	UTR5	RESCUE+S375C	A	17			SRR10523747	UTR5	RESCUE+S375C	A	2
SRR10523747	UTR3	RESCUE+S375C	A	265			SRR10523747	UTR3	RESCUE+S375C	A	6
SRR10523747	Other	RESCUE+S375C	A	381			SRR10523747	Other	RESCUE+S375C	A	46
SRR10523747	Intronic	RESCUE+S375C	A	341			SRR10523747	Intronic	RESCUE+S375C	A	50
SRR10523747	CDS_syn	RESCUE+S375C	A	102			SRR10523747	CDS_syn	RESCUE+S375C	A	2
SRR10523747	CDS_nonsyn	RESCUE+S375C	A	339			SRR10523747	CDS_nonsyn	RESCUE+S375C	A	2
SRR10523748	UTR5	RESCUE+S375N	A	100			SRR10523748	UTR5	RESCUE+S375N	A	0
SRR10523748	Other	RESCUE+S375N	A	667			SRR10523748	Other	RESCUE+S375N	A	52
SRR10523748	Intronic	RESCUE+S375N	A	547			SRR10523748	Intronic	RESCUE+S375N	A	79
SRR10523748	UTR3	RESCUE+S375N	A	2038			SRR10523748	UTR3	RESCUE+S375N	A	2
SRR10523748	CDS_syn	RESCUE+S375N	A	1167			SRR10523748	CDS_syn	RESCUE+S375N	A	0
SRR10523748	CDS_nonsyn	RESCUE+S375N	A	4049			SRR10523748	CDS_nonsyn	RESCUE+S375N	A	3
SRR10523749	CDS_nonsyn	REPAIRv1(N81S)	A	3110			SRR10523749	CDS_nonsyn	REPAIRv1(N81S)	A	0
SRR10523749	Intronic	REPAIRv1(N81S)	A	721			SRR10523749	Intronic	REPAIRv1(N81S)	A	58
SRR10523749	Other	REPAIRv1(N81S)	A	553			SRR10523749	Other	REPAIRv1(N81S)	A	51
SRR10523749	UTR5	REPAIRv1(N81S)	A	111			SRR10523749	UTR5	REPAIRv1(N81S)	A	0
SRR10523749	UTR3	REPAIRv1(N81S)	A	1556			SRR10523749	UTR3	REPAIRv1(N81S)	A	3
SRR10523749	CDS_syn	REPAIRv1(N81S)	A	957			SRR10523749	CDS_syn	REPAIRv1(N81S)	A	0
SRR10523750	Intronic	RESCUE+S375A	A	316			SRR10523750	Intronic	RESCUE+S375A	A	59
SRR10523750	UTR3	RESCUE+S375A	A	107			SRR10523750	UTR3	RESCUE+S375A	A	3
SRR10523750	CDS_syn	RESCUE+S375A	A	28			SRR10523750	CDS_syn	RESCUE+S375A	A	0
SRR10523750	CDS_nonsyn	RESCUE+S375A	A	77			SRR10523750	CDS_nonsyn	RESCUE+S375A	A	2
SRR10523750	UTR5	RESCUE+S375A	A	2			SRR10523750	UTR5	RESCUE+S375A	A	0
SRR10523750	Other	RESCUE+S375A	A	279			SRR10523750	Other	RESCUE+S375A	A	54
SRR10523752	Other	RESCUE+S375N	A	637			SRR10523752	Other	RESCUE+S375N	A	49
SRR10523752	Intronic	RESCUE+S375N	A	643			SRR10523752	Intronic	RESCUE+S375N	A	55
SRR10523752	UTR3	RESCUE+S375N	A	1799			SRR10523752	UTR3	RESCUE+S375N	A	6
SRR10523752	UTR5	RESCUE+S375N	A	106			SRR10523752	UTR5	RESCUE+S375N	A	0
SRR10523752	CDS_syn	RESCUE+S375N	A	932			SRR10523752	CDS_syn	RESCUE+S375N	A	0
SRR10523752	CDS_nonsyn	RESCUE+S375N	A	3158			SRR10523752	CDS_nonsyn	RESCUE+S375N	A	3
SRR10523753	Intronic	REPAIRv1(N81S)	A	578			SRR10523753	Intronic	REPAIRv1(N81S)	A	43
SRR10523753	UTR3	REPAIRv1(N81S)	A	1478			SRR10523753	UTR3	REPAIRv1(N81S)	A	3
SRR10523753	UTR5	REPAIRv1(N81S)	A	100			SRR10523753	UTR5	REPAIRv1(N81S)	A	0
SRR10523753	Other	REPAIRv1(N81S)	A	582			SRR10523753	Other	REPAIRv1(N81S)	A	45
SRR10523753	CDS_nonsyn	REPAIRv1(N81S)	A	2782			SRR10523753	CDS_nonsyn	REPAIRv1(N81S)	A	0
SRR10523753	CDS_syn	REPAIRv1(N81S)	A	825			SRR10523753	CDS_syn	REPAIRv1(N81S)	A	0
SRR10523754	Intronic	RESCUE+S375C	A	265			SRR10523754	Intronic	RESCUE+S375C	A	33
SRR10523754	UTR3	RESCUE+S375C	A	199			SRR10523754	UTR3	RESCUE+S375C	A	0
SRR10523754	Other	RESCUE+S375C	A	339			SRR10523754	Other	RESCUE+S375C	A	72
SRR10523754	CDS_nonsyn	RESCUE+S375C	A	280			SRR10523754	CDS_nonsyn	RESCUE+S375C	A	0
SRR10523754	UTR5	RESCUE+S375C	A	14			SRR10523754	UTR5	RESCUE+S375C	A	0
SRR10523754	CDS_syn	RESCUE+S375C	A	89			SRR10523754	CDS_syn	RESCUE+S375C	A	0
SRR10523755	Intronic	REPAIRv2	A	260			SRR10523755	Intronic	REPAIRv2	A	42
SRR10523755	Other	REPAIRv2	A	292			SRR10523755	Other	REPAIRv2	A	21
SRR10523755	CDS_nonsyn	REPAIRv2	A	49			SRR10523755	CDS_nonsyn	REPAIRv2	A	0
SRR10523755	UTR3	REPAIRv2	A	52			SRR10523755	UTR3	REPAIRv2	A	0
SRR10523755	UTR5	REPAIRv2	A	11			SRR10523755	UTR5	REPAIRv2	A	0
SRR10523755	CDS_syn	REPAIRv2	A	18			SRR10523755	CDS_syn	REPAIRv2	A	0
SRR10523756	Other	REPAIRv1(X85W)	A	2426			SRR10523756	Other	REPAIRv1(X85W)	A	41
SRR10523756	Intronic	REPAIRv1(X85W)	A	2408			SRR10523756	Intronic	REPAIRv1(X85W)	A	40
SRR10523756	UTR3	REPAIRv1(X85W)	A	13610			SRR10523756	UTR3	REPAIRv1(X85W)	A	0
SRR10523756	UTR5	REPAIRv1(X85W)	A	862			SRR10523756	UTR5	REPAIRv1(X85W)	A	0
SRR10523756	CDS_syn	REPAIRv1(X85W)	A	7107			SRR10523756	CDS_syn	REPAIRv1(X85W)	A	1
SRR10523756	CDS_nonsyn	REPAIRv1(X85W)	A	21954			SRR10523756	CDS_nonsyn	REPAIRv1(X85W)	A	0
SRR10523757	Intronic	RESCUE	A	1708			SRR10523757	Intronic	RESCUE	A	109
SRR10523757	UTR3	RESCUE	A	7709			SRR10523757	UTR3	RESCUE	A	14
SRR10523757	UTR5	RESCUE	A	407			SRR10523757	UTR5	RESCUE	A	0
SRR10523757	Other	RESCUE	A	1672			SRR10523757	Other	RESCUE	A	100
SRR10523757	CDS_nonsyn	RESCUE	A	13555			SRR10523757	CDS_nonsyn	RESCUE	A	8
SRR10523757	CDS_syn	RESCUE	A	4147			SRR10523757	CDS_syn	RESCUE	A	7
SRR10523758	Intronic	RESCUE+N473I	A	589			SRR10523758	Intronic	RESCUE+N473I	A	53
SRR10523758	UTR3	RESCUE+N473I	A	1488			SRR10523758	UTR3	RESCUE+N473I	A	9
SRR10523758	Other	RESCUE+N473I	A	601			SRR10523758	Other	RESCUE+N473I	A	63
SRR10523758	CDS_nonsyn	RESCUE+N473I	A	2843			SRR10523758	CDS_nonsyn	RESCUE+N473I	A	5
SRR10523758	UTR5	RESCUE+N473I	A	87			SRR10523758	UTR5	RESCUE+N473I	A	0
SRR10523758	CDS_syn	RESCUE+N473I	A	887			SRR10523758	CDS_syn	RESCUE+N473I	A	3
SRR10523759	Intronic	RESCUE+S375A	A	347			SRR10523759	Intronic	RESCUE+S375A	A	80
SRR10523759	Other	RESCUE+S375A	A	325			SRR10523759	Other	RESCUE+S375A	A	70
SRR10523759	CDS_nonsyn	RESCUE+S375A	A	108			SRR10523759	CDS_nonsyn	RESCUE+S375A	A	0
SRR10523759	UTR3	RESCUE+S375A	A	121			SRR10523759	UTR3	RESCUE+S375A	A	0
SRR10523759	UTR5	RESCUE+S375A	A	9			SRR10523759	UTR5	RESCUE+S375A	A	3
SRR10523759	CDS_syn	RESCUE+S375A	A	41			SRR10523759	CDS_syn	RESCUE+S375A	A	0
SRR10523761	Other	RESCUE+S375N	A	820			SRR10523761	Other	RESCUE+S375N	A	60
SRR10523761	Intronic	RESCUE+S375N	A	806			SRR10523761	Intronic	RESCUE+S375N	A	61
SRR10523761	UTR3	RESCUE+S375N	A	2306			SRR10523761	UTR3	RESCUE+S375N	A	9
SRR10523761	UTR5	RESCUE+S375N	A	138			SRR10523761	UTR5	RESCUE+S375N	A	0
SRR10523761	CDS_syn	RESCUE+S375N	A	1361			SRR10523761	CDS_syn	RESCUE+S375N	A	1
SRR10523761	CDS_nonsyn	RESCUE+S375N	A	4515			SRR10523761	CDS_nonsyn	RESCUE+S375N	A	2
SRR10523762	Intronic	REPAIRv1(N81S)	A	477			SRR10523762	Intronic	REPAIRv1(N81S)	A	36
SRR10523762	UTR3	REPAIRv1(N81S)	A	1157			SRR10523762	UTR3	REPAIRv1(N81S)	A	0
SRR10523762	UTR5	REPAIRv1(N81S)	A	68			SRR10523762	UTR5	REPAIRv1(N81S)	A	0
SRR10523762	Other	REPAIRv1(N81S)	A	538			SRR10523762	Other	REPAIRv1(N81S)	A	55
SRR10523762	CDS_nonsyn	REPAIRv1(N81S)	A	2117			SRR10523762	CDS_nonsyn	REPAIRv1(N81S)	A	0
SRR10523762	CDS_syn	REPAIRv1(N81S)	A	653			SRR10523762	CDS_syn	REPAIRv1(N81S)	A	0
SRR10523763	Intronic	RESCUE+S375A	A	315			SRR10523763	Intronic	RESCUE+S375A	A	69
SRR10523763	UTR3	RESCUE+S375A	A	55			SRR10523763	UTR3	RESCUE+S375A	A	3
SRR10523763	Other	RESCUE+S375A	A	315			SRR10523763	Other	RESCUE+S375A	A	66
SRR10523763	CDS_nonsyn	RESCUE+S375A	A	89			SRR10523763	CDS_nonsyn	RESCUE+S375A	A	0
SRR10523763	UTR5	RESCUE+S375A	A	9			SRR10523763	UTR5	RESCUE+S375A	A	2
SRR10523763	CDS_syn	RESCUE+S375A	A	27			SRR10523763	CDS_syn	RESCUE+S375A	A	0
SRR10523764	Intronic	RESCUE+S375C	A	301			SRR10523764	Intronic	RESCUE+S375C	A	56
SRR10523764	Other	RESCUE+S375C	A	360			SRR10523764	Other	RESCUE+S375C	A	60
SRR10523764	CDS_nonsyn	RESCUE+S375C	A	253			SRR10523764	CDS_nonsyn	RESCUE+S375C	A	0
SRR10523764	UTR3	RESCUE+S375C	A	203			SRR10523764	UTR3	RESCUE+S375C	A	3
SRR10523764	UTR5	RESCUE+S375C	A	12			SRR10523764	UTR5	RESCUE+S375C	A	3
SRR10523764	CDS_syn	RESCUE+S375C	A	103			SRR10523764	CDS_syn	RESCUE+S375C	A	0
SRR10523766	Other	REPAIRv1(N81S)	A	406			SRR10523766	Other	REPAIRv1(N81S)	A	29
SRR10523766	Intronic	REPAIRv1(N81S)	A	414			SRR10523766	Intronic	REPAIRv1(N81S)	A	24
SRR10523766	UTR3	REPAIRv1(N81S)	A	923			SRR10523766	UTR3	REPAIRv1(N81S)	A	3
SRR10523766	UTR5	REPAIRv1(N81S)	A	103			SRR10523766	UTR5	REPAIRv1(N81S)	A	0
SRR10523766	CDS_syn	REPAIRv1(N81S)	A	599			SRR10523766	CDS_syn	REPAIRv1(N81S)	A	0
SRR10523766	CDS_nonsyn	REPAIRv1(N81S)	A	2066			SRR10523766	CDS_nonsyn	REPAIRv1(N81S)	A	2
SRR6686536	CDS_nonsyn	2BoxB-4LN-DD NLS	B	21172			SRR8910093	CDS_nonsyn	hA3A-BE3	D	2382
SRR6686536	CDS_syn	2BoxB-4LN-DD NLS	B	6657			SRR8910093	CDS_syn	hA3A-BE3	D	2482
SRR6686536	UTR5	2BoxB-4LN-DD NLS	B	2290			SRR8910093	UTR5	hA3A-BE3	D	234
SRR6686536	UTR3	2BoxB-4LN-DD NLS	B	24591			SRR8910093	UTR3	hA3A-BE3	D	3435
SRR6686536	Other	2BoxB-4LN-DD NLS	B	46613			SRR8910093	Intronic	hA3A-BE3	D	705
SRR6686536	Intronic	2BoxB-4LN-DD NLS	B	95207			SRR8910093	Other	hA3A-BE3	D	1412
SRR6686537	CDS_nonsyn	2BoxB-4LN-DD E488Q	B	129965			SRR8910094	CDS_nonsyn	eA3A-BE3	D	1
SRR6686537	CDS_syn	2BoxB-4LN-DD E488Q	B	41327			SRR8910094	CDS_syn	eA3A-BE3	D	0
SRR6686537	UTR3	2BoxB-4LN-DD E488Q	B	102908			SRR8910094	UTR5	eA3A-BE3	D	0
SRR6686537	Intronic	2BoxB-4LN-DD E488Q	B	182701			SRR8910094	UTR3	eA3A-BE3	D	4
SRR6686537	UTR5	2BoxB-4LN-DD E488Q	B	10713			SRR8910094	Intronic	eA3A-BE3	D	15
SRR6686537	Other	2BoxB-4LN-DD E488Q	B	69404			SRR8910094	Other	eA3A-BE3	D	29
SRR6686538	CDS_syn	No guide-No enzyme	B	78			SRR8910095	UTR3	hAID-BE3	D	0
SRR6686538	UTR3	No guide-No enzyme	B	6796			SRR8910095	CDS_syn	hAID-BE3	D	1
SRR6686538	CDS_nonsyn	No guide-No enzyme	B	200			SRR8910095	UTR5	hAID-BE3	D	0
SRR6686538	UTR5	No guide-No enzyme	B	96			SRR8910095	CDS_nonsyn	hAID-BE3	D	0
SRR6686538	Intronic	No guide-No enzyme	B	23887			SRR8910095	Other	hAID-BE3	D	53
SRR6686538	Other	No guide-No enzyme	B	18667			SRR8910095	Intronic	hAID-BE3	D	26
SRR6686539	UTR5	2BoxB-4LN-DD	B	5255			SRR8910097	CDS_nonsyn	hA3A-BE3	D	2349
SRR6686539	Other	2BoxB-4LN-DD	B	63060			SRR8910097	UTR5	hA3A-BE3	D	255
SRR6686539	Intronic	2BoxB-4LN-DD	B	134459			SRR8910097	Other	hA3A-BE3	D	1324
SRR6686539	CDS_syn	2BoxB-4LN-DD	B	22476			SRR8910097	CDS_syn	hA3A-BE3	D	2455
SRR6686539	CDS_nonsyn	2BoxB-4LN-DD	B	65450			SRR8910097	Intronic	hA3A-BE3	D	760
SRR6686539	UTR3	2BoxB-4LN-DD	B	58582			SRR8910097	UTR3	hA3A-BE3	D	3119
SRR6686540	CDS_nonsyn	No guide-4LN-DD NLS	B	199			SRR8910098	CDS_nonsyn	eA3A-BE3	D	6
SRR6686540	CDS_syn	No guide-4LN-DD NLS	B	94			SRR8910098	UTR5	eA3A-BE3	D	0
SRR6686540	UTR3	No guide-4LN-DD NLS	B	9120			SRR8910098	CDS_syn	eA3A-BE3	D	7
SRR6686540	Other	No guide-4LN-DD NLS	B	23744			SRR8910098	Intronic	eA3A-BE3	D	15
SRR6686540	UTR5	No guide-4LN-DD NLS	B	70			SRR8910098	UTR3	eA3A-BE3	D	8
SRR6686540	Intronic	No guide-4LN-DD NLS	B	24176			SRR8910098	Other	eA3A-BE3	D	57
SRR6686541	CDS_nonsyn	No guide-4LN-DD E488Q NLS	B	59682			SRR8910099	UTR5	hAID-BE3	D	0
SRR6686541	UTR3	No guide-4LN-DD E488Q NLS	B	59065			SRR8910099	Intronic	hAID-BE3	D	59
SRR6686541	CDS_syn	No guide-4LN-DD E488Q NLS	B	19739			SRR8910099	UTR3	hAID-BE3	D	13
SRR6686541	UTR5	No guide-4LN-DD E488Q NLS	B	5658			SRR8910099	Other	hAID-BE3	D	80
SRR6686541	Intronic	No guide-4LN-DD E488Q NLS	B	210278			SRR8910099	CDS_nonsyn	hAID-BE3	D	5
SRR6686541	Other	No guide-4LN-DD E488Q NLS	B	113473			SRR8910099	CDS_syn	hAID-BE3	D	5
SRR6686542	CDS_syn	2BoxB-4LN-DD E488Q NLS	B	18283			SRR8910101	UTR3	hA3A-BE3	D	4789
SRR6686542	CDS_nonsyn	2BoxB-4LN-DD E488Q NLS	B	59550			SRR8910101	CDS_nonsyn	hA3A-BE3	D	3375
SRR6686542	UTR5	2BoxB-4LN-DD E488Q NLS	B	6275			SRR8910101	Intronic	hA3A-BE3	D	916
SRR6686542	UTR3	2BoxB-4LN-DD E488Q NLS	B	44648			SRR8910101	UTR5	hA3A-BE3	D	390
SRR6686542	Intronic	2BoxB-4LN-DD E488Q NLS	B	123102			SRR8910101	CDS_syn	hA3A-BE3	D	3600
SRR6686542	Other	2BoxB-4LN-DD E488Q NLS	B	47607			SRR8910101	Other	hA3A-BE3	D	1796
SRR6686543	CDS_syn	2BoxB-No enzyme	B	80			SRR8910102	Other	eA3A-BE3	D	44
SRR6686543	Intronic	2BoxB-No enzyme	B	23379			SRR8910102	Intronic	eA3A-BE3	D	29
SRR6686543	UTR5	2BoxB-No enzyme	B	84			SRR8910102	CDS_nonsyn	eA3A-BE3	D	0
SRR6686543	Other	2BoxB-No enzyme	B	25184			SRR8910102	UTR3	eA3A-BE3	D	9
SRR6686543	UTR3	2BoxB-No enzyme	B	9337			SRR8910102	UTR5	eA3A-BE3	D	4
SRR6686543	CDS_nonsyn	2BoxB-No enzyme	B	194			SRR8910102	CDS_syn	eA3A-BE3	D	2
SRR8979748	Other	Cas9D10A	C	470			SRR8910103	Other	hAID-BE3	D	46
SRR8979748	Intronic	Cas9D10A	C	423			SRR8910103	CDS_syn	hAID-BE3	D	1
SRR8979748	UTR3	Cas9D10A	C	230			SRR8910103	UTR3	hAID-BE3	D	8
SRR8979748	UTR5	Cas9D10A	C	0			SRR8910103	UTR5	hAID-BE3	D	0
SRR8979748	CDS_syn	Cas9D10A	C	2			SRR8910103	Intronic	hAID-BE3	D	23
SRR8979748	CDS_nonsyn	Cas9D10A	C	5			SRR8910103	CDS_nonsyn	hAID-BE3	D	4
SRR8979749	Intronic	ABETadAE59ATadAevoE59A	C	911			SRR8910104	Intronic	GFP	D	31
SRR8979749	UTR3	ABETadAE59ATadAevoE59A	C	355			SRR8910104	UTR3	GFP	D	0
SRR8979749	UTR5	ABETadAE59ATadAevoE59A	C	0			SRR8910104	UTR5	GFP	D	0
SRR8979749	Other	ABETadAE59ATadAevoE59A	C	574			SRR8910104	Other	GFP	D	42
SRR8979749	CDS_nonsyn	ABETadAE59ATadAevoE59A	C	12			SRR8910104	CDS_syn	GFP	D	1
SRR8979749	CDS_syn	ABETadAE59ATadAevoE59A	C	8			SRR8910104	CDS_nonsyn	GFP	D	0
SRR8979751	Intronic	ABEmax	C	226			SRR11561274	Other	BE4-SsAPOBEC3B	E	0
SRR8979751	UTR3	ABEmax	C	713			SRR11561274	Intronic	BE4-SsAPOBEC3B	E	11
SRR8979751	Other	ABEmax	C	265			SRR11561274	UTR3	BE4-SsAPOBEC3B	E	0
SRR8979751	CDS_nonsyn	ABEmax	C	209			SRR11561274	UTR5	BE4-SsAPOBEC3B	E	0
SRR8979751	UTR5	ABEmax	C	25			SRR11561274	CDS_syn	BE4-SsAPOBEC3B	E	0
SRR8979751	CDS_syn	ABEmax	C	54			SRR11561274	CDS_nonsyn	BE4-SsAPOBEC3B	E	0
SRR8979753	Intronic	ABETadAE59A	C	402			SRR11561276	CDS_nonsyn	BE4-SsAPOBEC3B	E	0
SRR8979753	Other	ABETadAE59A	C	229			SRR11561276	Intronic	BE4-SsAPOBEC3B	E	16
SRR8979753	CDS_nonsyn	ABETadAE59A	C	228			SRR11561276	UTR3	BE4-SsAPOBEC3B	E	8
SRR8979753	UTR3	ABETadAE59A	C	895			SRR11561276	UTR5	BE4-SsAPOBEC3B	E	0
SRR8979753	UTR5	ABETadAE59A	C	24			SRR11561276	Other	BE4-SsAPOBEC3B	E	0
SRR8979753	CDS_syn	ABETadAE59A	C	76			SRR11561276	CDS_syn	BE4-SsAPOBEC3B	E	0
SRR8979754	Other	ABEmax	C	529			SRR11561277	CDS_nonsyn	BE4-SsAPOBEC3B	E	0
SRR8979754	Intronic	ABEmax	C	578			SRR11561277	Other	BE4-SsAPOBEC3B	E	12
SRR8979754	UTR3	ABEmax	C	1826			SRR11561277	Intronic	BE4-SsAPOBEC3B	E	9
SRR8979754	UTR5	ABEmax	C	39			SRR11561277	CDS_syn	BE4-SsAPOBEC3B	E	0
SRR8979754	CDS_syn	ABEmax	C	144			SRR11561277	UTR3	BE4-SsAPOBEC3B	E	0
SRR8979754	CDS_nonsyn	ABEmax	C	508			SRR11561277	UTR5	BE4-SsAPOBEC3B	E	0
SRR8979755	Intronic	ABEmaxAW	C	851			SRR11561279	CDS_nonsyn	BE4-SsAPOBEC3B	E	0
SRR8979755	UTR3	ABEmaxAW	C	628			SRR11561279	CDS_syn	BE4-SsAPOBEC3B	E	0
SRR8979755	UTR5	ABEmaxAW	C	0			SRR11561279	Other	BE4-SsAPOBEC3B	E	0
SRR8979755	Other	ABEmaxAW	C	680			SRR11561279	Intronic	BE4-SsAPOBEC3B	E	8
SRR8979755	CDS_nonsyn	ABEmaxAW	C	31			SRR11561279	UTR5	BE4-SsAPOBEC3B	E	0
SRR8979755	CDS_syn	ABEmaxAW	C	13			SRR11561279	UTR3	BE4-SsAPOBEC3B	E	0
SRR8979756	Intronic	ABEmaxAW	C	427			SRR11561281	CDS_nonsyn	BE4-AmAPOBEC1	E	0
SRR8979756	UTR3	ABEmaxAW	C	235			SRR11561281	CDS_syn	BE4-AmAPOBEC1	E	0
SRR8979756	Other	ABEmaxAW	C	287			SRR11561281	UTR5	BE4-AmAPOBEC1	E	0
SRR8979756	CDS_nonsyn	ABEmaxAW	C	23			SRR11561281	UTR3	BE4-AmAPOBEC1	E	0
SRR8979756	UTR5	ABEmaxAW	C	0			SRR11561281	Other	BE4-AmAPOBEC1	E	0
SRR8979756	CDS_syn	ABEmaxAW	C	9			SRR11561281	Intronic	BE4-AmAPOBEC1	E	0
SRR8979757	Intronic	Cas9D10A	C	144			SRR11561282	CDS_nonsyn	BE4-AmAPOBEC1	E	0
SRR8979757	Other	Cas9D10A	C	258			SRR11561282	CDS_syn	BE4-AmAPOBEC1	E	0
SRR8979757	CDS_nonsyn	Cas9D10A	C	26			SRR11561282	UTR5	BE4-AmAPOBEC1	E	0
SRR8979757	UTR3	Cas9D10A	C	215			SRR11561282	UTR3	BE4-AmAPOBEC1	E	0
SRR8979757	UTR5	Cas9D10A	C	0			SRR11561282	Intronic	BE4-AmAPOBEC1	E	0
SRR8979757	CDS_syn	Cas9D10A	C	16			SRR11561282	Other	BE4-AmAPOBEC1	E	0
SRR8979758	Other	ABETadAE59A	C	581			SRR11561283	CDS_nonsyn	BE4-AmAPOBEC1	E	0
SRR8979758	Intronic	ABETadAE59A	C	417			SRR11561283	CDS_syn	BE4-AmAPOBEC1	E	0
SRR8979758	UTR3	ABETadAE59A	C	558			SRR11561283	UTR5	BE4-AmAPOBEC1	E	0
SRR8979758	UTR5	ABETadAE59A	C	0			SRR11561283	UTR3	BE4-AmAPOBEC1	E	0
SRR8979758	CDS_syn	ABETadAE59A	C	15			SRR11561283	Intronic	BE4-AmAPOBEC1	E	0
SRR8979758	CDS_nonsyn	ABETadAE59A	C	76			SRR11561283	Other	BE4-AmAPOBEC1	E	0
SRR8979759	Intronic	ABEmax	C	384			SRR11561284	CDS_nonsyn	BE4-AmAPOBEC1	E	0
SRR8979759	UTR3	ABEmax	C	655			SRR11561284	CDS_syn	BE4-AmAPOBEC1	E	0
SRR8979759	UTR5	ABEmax	C	4			SRR11561284	UTR5	BE4-AmAPOBEC1	E	0
SRR8979759	Other	ABEmax	C	406			SRR11561284	UTR3	BE4-AmAPOBEC1	E	0
SRR8979759	CDS_nonsyn	ABEmax	C	197			SRR11561284	Intronic	BE4-AmAPOBEC1	E	8
SRR8979759	CDS_syn	ABEmax	C	55			SRR11561284	Other	BE4-AmAPOBEC1	E	0
SRR8979760	Intronic	Cas9D10A	C	244			SRR11561285	CDS_nonsyn	BE4-AmAPOBEC1	E	0
SRR8979760	UTR3	Cas9D10A	C	150			SRR11561285	CDS_syn	BE4-AmAPOBEC1	E	0
SRR8979760	Other	Cas9D10A	C	226			SRR11561285	UTR5	BE4-AmAPOBEC1	E	0
SRR8979760	CDS_nonsyn	Cas9D10A	C	1			SRR11561285	UTR3	BE4-AmAPOBEC1	E	0
SRR8979760	UTR5	Cas9D10A	C	0			SRR11561285	Intronic	BE4-AmAPOBEC1	E	0
SRR8979760	CDS_syn	Cas9D10A	C	0			SRR11561285	Other	BE4-AmAPOBEC1	E	0
SRR8979761	Intronic	ABETadAE59ATadAevoE59A	C	255			SRR11561286	CDS_syn	BE4-AmAPOBEC1	E	0
SRR8979761	Other	ABETadAE59ATadAevoE59A	C	176			SRR11561286	CDS_nonsyn	BE4-AmAPOBEC1	E	0
SRR8979761	CDS_nonsyn	ABETadAE59ATadAevoE59A	C	0			SRR11561286	UTR5	BE4-AmAPOBEC1	E	0
SRR8979761	UTR3	ABETadAE59ATadAevoE59A	C	187			SRR11561286	UTR3	BE4-AmAPOBEC1	E	0
SRR8979761	UTR5	ABETadAE59ATadAevoE59A	C	0			SRR11561286	Intronic	BE4-AmAPOBEC1	E	0
SRR8979761	CDS_syn	ABETadAE59ATadAevoE59A	C	0			SRR11561286	Other	BE4-AmAPOBEC1	E	0
SRR8979762	Other	ABEmaxAW	C	297			SRR11561287	UTR5	BE4-RrA3F	E	0
SRR8979762	Intronic	ABEmaxAW	C	217			SRR11561287	UTR3	BE4-RrA3F	E	295
SRR8979762	UTR3	ABEmaxAW	C	309			SRR11561287	CDS_syn	BE4-RrA3F	E	30
SRR8979762	UTR5	ABEmaxAW	C	0			SRR11561287	CDS_nonsyn	BE4-RrA3F	E	38
SRR8979762	CDS_syn	ABEmaxAW	C	1			SRR11561287	Intronic	BE4-RrA3F	E	55
SRR8979762	CDS_nonsyn	ABEmaxAW	C	8			SRR11561287	Other	BE4-RrA3F	E	23
SRR8908975	Other	ABEmax	D	50414			SRR11561288	UTR3	BE4-RrA3F	E	272
SRR8908975	CDS_syn	ABEmax	D	14970			SRR11561288	UTR5	BE4-RrA3F	E	0
SRR8908975	UTR3	ABEmax	D	92290			SRR11561288	Intronic	BE4-RrA3F	E	17
SRR8908975	UTR5	ABEmax	D	2228			SRR11561288	CDS_syn	BE4-RrA3F	E	29
SRR8908975	Intronic	ABEmax	D	90734			SRR11561288	CDS_nonsyn	BE4-RrA3F	E	35
SRR8908975	CDS_nonsyn	ABEmax	D	48431			SRR11561288	Other	BE4-RrA3F	E	11
SRR8908976	Intronic	miniABEmax	D	48113			SRR11561290	Intronic	BE4-RrA3F	E	70
SRR8908976	UTR3	miniABEmax	D	100603			SRR11561290	CDS_nonsyn	BE4-RrA3F	E	19
SRR8908976	UTR5	miniABEmax	D	2794			SRR11561290	UTR3	BE4-RrA3F	E	185
SRR8908976	Other	miniABEmax	D	29201			SRR11561290	UTR5	BE4-RrA3F	E	0
SRR8908976	CDS_syn	miniABEmax	D	16374			SRR11561290	CDS_syn	BE4-RrA3F	E	13
SRR8908976	CDS_nonsyn	miniABEmax	D	52940			SRR11561290	Other	BE4-RrA3F	E	11
SRR8908977	CDS_nonsyn	K20A/R21A	D	2191			SRR11561291	Other	BE4-RrA3F	E	21
SRR8908977	Intronic	K20A/R21A	D	67974			SRR11561291	Intronic	BE4-RrA3F	E	48
SRR8908977	UTR3	K20A/R21A	D	20581			SRR11561291	UTR3	BE4-RrA3F	E	229
SRR8908977	CDS_syn	K20A/R21A	D	776			SRR11561291	UTR5	BE4-RrA3F	E	22
SRR8908977	Other	K20A/R21A	D	35268			SRR11561291	CDS_syn	BE4-RrA3F	E	14
SRR8908977	UTR5	K20A/R21A	D	268			SRR11561291	CDS_nonsyn	BE4-RrA3F	E	15
SRR8908978	Intronic	V82G	D	44909			SRR11561293	CDS_nonsyn	BE4-RrA3F	E	42
SRR8908978	Other	V82G	D	22765			SRR11561293	Intronic	BE4-RrA3F	E	78
SRR8908978	CDS_nonsyn	V82G	D	2368			SRR11561293	UTR3	BE4-RrA3F	E	275
SRR8908978	UTR5	V82G	D	182			SRR11561293	UTR5	BE4-RrA3F	E	10
SRR8908978	CDS_syn	V82G	D	801			SRR11561293	Other	BE4-RrA3F	E	40
SRR8908978	UTR3	V82G	D	16752			SRR11561293	CDS_syn	BE4-RrA3F	E	28
SRR8908980	CDS_nonsyn	ABEmax	D	61880			SRR11561294	CDS_nonsyn	BE4-PpAPOBEC1-H122A	E	50
SRR8908980	UTR5	ABEmax	D	2932			SRR11561294	Other	BE4-PpAPOBEC1-H122A	E	53
SRR8908980	CDS_syn	ABEmax	D	18897			SRR11561294	Intronic	BE4-PpAPOBEC1-H122A	E	50
SRR8908980	Intronic	ABEmax	D	96358			SRR11561294	CDS_syn	BE4-PpAPOBEC1-H122A	E	33
SRR8908980	UTR3	ABEmax	D	98846			SRR11561294	UTR3	BE4-PpAPOBEC1-H122A	E	168
SRR8908980	Other	ABEmax	D	55356			SRR11561294	UTR5	BE4-PpAPOBEC1-H122A	E	14
SRR8908981	UTR5	miniABEmax	D	8648			SRR11561295	CDS_nonsyn	BE4-PpAPOBEC1-H122A	E	30
SRR8908981	CDS_syn	miniABEmax	D	54538			SRR11561295	CDS_syn	BE4-PpAPOBEC1-H122A	E	26
SRR8908981	Intronic	miniABEmax	D	137338			SRR11561295	Other	BE4-PpAPOBEC1-H122A	E	64
SRR8908981	CDS_nonsyn	miniABEmax	D	175794			SRR11561295	Intronic	BE4-PpAPOBEC1-H122A	E	101
SRR8908981	UTR3	miniABEmax	D	274646			SRR11561295	UTR5	BE4-PpAPOBEC1-H122A	E	0
SRR8908981	Other	miniABEmax	D	81569			SRR11561295	UTR3	BE4-PpAPOBEC1-H122A	E	207
SRR8908982	UTR3	K20A/R21A	D	23688			SRR11561296	CDS_nonsyn	BE4-PpAPOBEC1-H122A	E	53
SRR8908982	CDS_syn	K20A/R21A	D	1613			SRR11561296	CDS_syn	BE4-PpAPOBEC1-H122A	E	49
SRR8908982	UTR5	K20A/R21A	D	506			SRR11561296	UTR5	BE4-PpAPOBEC1-H122A	E	0
SRR8908982	Other	K20A/R21A	D	41073			SRR11561296	UTR3	BE4-PpAPOBEC1-H122A	E	114
SRR8908982	Intronic	K20A/R21A	D	76268			SRR11561296	Other	BE4-PpAPOBEC1-H122A	E	85
SRR8908982	CDS_nonsyn	K20A/R21A	D	4803			SRR11561296	Intronic	BE4-PpAPOBEC1-H122A	E	111
SRR8908983	CDS_syn	V82G	D	1490			SRR11561297	CDS_nonsyn	BE4-rAPOBEC1	E	21100
SRR8908983	CDS_nonsyn	V82G	D	4285			SRR11561297	CDS_syn	BE4-rAPOBEC1	E	17248
SRR8908983	Other	V82G	D	54850			SRR11561297	UTR5	BE4-rAPOBEC1	E	1885
SRR8908983	UTR3	V82G	D	25117			SRR11561297	UTR3	BE4-rAPOBEC1	E	116157
SRR8908983	Intronic	V82G	D	106979			SRR11561297	Intronic	BE4-rAPOBEC1	E	23640
SRR8908983	UTR5	V82G	D	498			SRR11561297	Other	BE4-rAPOBEC1	E	16732
SRR8908985	CDS_nonsyn	ABEmax	D	61574			SRR11561298	CDS_nonsyn	BE4-rAPOBEC1	E	21287
SRR8908985	CDS_syn	ABEmax	D	18748			SRR11561298	CDS_syn	BE4-rAPOBEC1	E	17322
SRR8908985	UTR5	ABEmax	D	3126			SRR11561298	UTR5	BE4-rAPOBEC1	E	1880
SRR8908985	UTR3	ABEmax	D	101147			SRR11561298	UTR3	BE4-rAPOBEC1	E	114468
SRR8908985	Intronic	ABEmax	D	82400			SRR11561298	Intronic	BE4-rAPOBEC1	E	22574
SRR8908985	Other	ABEmax	D	49154			SRR11561298	Other	BE4-rAPOBEC1	E	16192
SRR8908986	UTR3	miniABEmax	D	321229			SRR11561299	CDS_nonsyn	BE4-rAPOBEC1	E	22333
SRR8908986	CDS_syn	miniABEmax	D	64565			SRR11561299	CDS_syn	BE4-rAPOBEC1	E	18827
SRR8908986	UTR5	miniABEmax	D	11812			SRR11561299	UTR5	BE4-rAPOBEC1	E	1802
SRR8908986	CDS_nonsyn	miniABEmax	D	211059			SRR11561299	UTR3	BE4-rAPOBEC1	E	122053
SRR8908986	Other	miniABEmax	D	99111			SRR11561299	Intronic	BE4-rAPOBEC1	E	25287
SRR8908986	Intronic	miniABEmax	D	167998			SRR11561299	Other	BE4-rAPOBEC1	E	17177
SRR8908987	Other	K20A/R21A	D	28787			SRR11561300	CDS_nonsyn	BE4-PpAPOBEC1-H122A	E	84
SRR8908987	CDS_syn	K20A/R21A	D	1382			SRR11561300	CDS_syn	BE4-PpAPOBEC1-H122A	E	57
SRR8908987	CDS_nonsyn	K20A/R21A	D	3971			SRR11561300	UTR5	BE4-PpAPOBEC1-H122A	E	14
SRR8908987	UTR3	K20A/R21A	D	18442			SRR11561300	UTR3	BE4-PpAPOBEC1-H122A	E	193
SRR8908987	Intronic	K20A/R21A	D	55201			SRR11561300	Intronic	BE4-PpAPOBEC1-H122A	E	105
SRR8908987	UTR5	K20A/R21A	D	404			SRR11561300	Other	BE4-PpAPOBEC1-H122A	E	31
SRR8908988	CDS_nonsyn	V82G	D	4721			SRR11561301	CDS_syn	BE4-PpAPOBEC1-H122A	E	5
SRR8908988	UTR5	V82G	D	486			SRR11561301	CDS_nonsyn	BE4-PpAPOBEC1-H122A	E	10
SRR8908988	Other	V82G	D	44953			SRR11561301	UTR5	BE4-PpAPOBEC1-H122A	E	0
SRR8908988	CDS_syn	V82G	D	1546			SRR11561301	UTR3	BE4-PpAPOBEC1-H122A	E	0
SRR8908988	Intronic	V82G	D	89309			SRR11561301	Intronic	BE4-PpAPOBEC1-H122A	E	11
SRR8908988	UTR3	V82G	D	27213			SRR11561301	Other	BE4-PpAPOBEC1-H122A	E	1
SRR8908990	UTR5	ABEmax	D	1083			SRR11561302	UTR5	BE4-PpAPOBEC1-H122A	E	6
SRR8908990	Intronic	ABEmax	D	43210			SRR11561302	UTR3	BE4-PpAPOBEC1-H122A	E	15
SRR8908990	UTR3	ABEmax	D	42563			SRR11561302	CDS_syn	BE4-PpAPOBEC1-H122A	E	6
SRR8908990	Other	ABEmax	D	25502			SRR11561302	CDS_nonsyn	BE4-PpAPOBEC1-H122A	E	13
SRR8908990	CDS_syn	ABEmax	D	6767			SRR11561302	Intronic	BE4-PpAPOBEC1-H122A	E	13
SRR8908990	CDS_nonsyn	ABEmax	D	22258			SRR11561302	Other	BE4-PpAPOBEC1-H122A	E	-6
SRR8908991	UTR5	miniABEmax	D	5415			SRR11561303	UTR3	nCas9	E	114
SRR8908991	UTR3	miniABEmax	D	193856			SRR11561303	UTR5	nCas9	E	0
SRR8908991	Intronic	miniABEmax	D	92378			SRR11561303	Intronic	nCas9	E	59
SRR8908991	Other	miniABEmax	D	56448			SRR11561303	CDS_syn	nCas9	E	56
SRR8908991	CDS_nonsyn	miniABEmax	D	108721			SRR11561303	CDS_nonsyn	nCas9	E	38
SRR8908991	CDS_syn	miniABEmax	D	34724			SRR11561303	Other	nCas9	E	72
SRR8908992	Other	K20A/R21A	D	33776			SRR11561304	Intronic	BE4-PpAPOBEC1-R33A	E	28
SRR8908992	CDS_nonsyn	K20A/R21A	D	2990			SRR11561304	CDS_nonsyn	BE4-PpAPOBEC1-R33A	E	46
SRR8908992	Intronic	K20A/R21A	D	68661			SRR11561304	UTR3	BE4-PpAPOBEC1-R33A	E	125
SRR8908992	CDS_syn	K20A/R21A	D	1083			SRR11561304	UTR5	BE4-PpAPOBEC1-R33A	E	1
SRR8908992	UTR5	K20A/R21A	D	253			SRR11561304	CDS_syn	BE4-PpAPOBEC1-R33A	E	45
SRR8908992	UTR3	K20A/R21A	D	19437			SRR11561304	Other	BE4-PpAPOBEC1-R33A	E	31
SRR8908993	CDS_nonsyn	V82G	D	3138			SRR11561305	Other	BE4-PpAPOBEC1-R33A	E	62
SRR8908993	Other	V82G	D	36477			SRR11561305	Intronic	BE4-PpAPOBEC1-R33A	E	73
SRR8908993	CDS_syn	V82G	D	1068			SRR11561305	UTR3	BE4-PpAPOBEC1-R33A	E	146
SRR8908993	UTR5	V82G	D	382			SRR11561305	UTR5	BE4-PpAPOBEC1-R33A	E	0
SRR8908993	Intronic	V82G	D	79454			SRR11561305	CDS_syn	BE4-PpAPOBEC1-R33A	E	20
SRR8908993	UTR3	V82G	D	20285			SRR11561305	CDS_nonsyn	BE4-PpAPOBEC1-R33A	E	22
SRR8908995	UTR3	ABEmax	D	104290			SRR11561307	CDS_nonsyn	BE4-PpAPOBEC1-R33A	E	54
SRR8908995	UTR5	ABEmax	D	2908			SRR11561307	Intronic	BE4-PpAPOBEC1-R33A	E	35
SRR8908995	Other	ABEmax	D	69465			SRR11561307	UTR3	BE4-PpAPOBEC1-R33A	E	183
SRR8908995	Intronic	ABEmax	D	119143			SRR11561307	UTR5	BE4-PpAPOBEC1-R33A	E	18
SRR8908995	CDS_syn	ABEmax	D	19919			SRR11561307	Other	BE4-PpAPOBEC1-R33A	E	26
SRR8908995	CDS_nonsyn	ABEmax	D	64719			SRR11561307	CDS_syn	BE4-PpAPOBEC1-R33A	E	42
SRR8908996	Intronic	miniABEmax	D	99813			SRR11561308	CDS_nonsyn	BE4-PpAPOBEC1-R33A	E	24
SRR8908996	UTR3	miniABEmax	D	203588			SRR11561308	Other	BE4-PpAPOBEC1-R33A	E	20
SRR8908996	CDS_nonsyn	miniABEmax	D	126903			SRR11561308	Intronic	BE4-PpAPOBEC1-R33A	E	66
SRR8908996	Other	miniABEmax	D	60137			SRR11561308	CDS_syn	BE4-PpAPOBEC1-R33A	E	27
SRR8908996	CDS_syn	miniABEmax	D	39895			SRR11561308	UTR3	BE4-PpAPOBEC1-R33A	E	101
SRR8908996	UTR5	miniABEmax	D	6012			SRR11561308	UTR5	BE4-PpAPOBEC1-R33A	E	0
SRR8908997	Intronic	K20A/R21A	D	62165			SRR11561309	CDS_nonsyn	BE4-PpAPOBEC1-R33A	E	31
SRR8908997	UTR3	K20A/R21A	D	17527			SRR11561309	CDS_syn	BE4-PpAPOBEC1-R33A	E	22
SRR8908997	CDS_syn	K20A/R21A	D	1002			SRR11561309	Other	BE4-PpAPOBEC1-R33A	E	50
SRR8908997	Other	K20A/R21A	D	32629			SRR11561309	Intronic	BE4-PpAPOBEC1-R33A	E	95
SRR8908997	CDS_nonsyn	K20A/R21A	D	2933			SRR11561309	UTR5	BE4-PpAPOBEC1-R33A	E	0
SRR8908997	UTR5	K20A/R21A	D	285			SRR11561309	UTR3	BE4-PpAPOBEC1-R33A	E	107
SRR8908998	Intronic	V82G	D	251334			SRR11561315	CDS_nonsyn	BE4-PpAPOBEC1	E	30
SRR8908998	CDS_nonsyn	V82G	D	7015			SRR11561315	CDS_syn	BE4-PpAPOBEC1	E	43
SRR8908998	UTR3	V82G	D	41462			SRR11561315	UTR5	BE4-PpAPOBEC1	E	0
SRR8908998	UTR5	V82G	D	877			SRR11561315	UTR3	BE4-PpAPOBEC1	E	170
SRR8908998	Other	V82G	D	124380			SRR11561315	Other	BE4-PpAPOBEC1	E	38
SRR8908998	CDS_syn	V82G	D	2419			SRR11561315	Intronic	BE4-PpAPOBEC1	E	70
SRR8909000	CDS_nonsyn	ABEmax	D	75264			SRR11561316	CDS_nonsyn	BE4-PpAPOBEC1	E	24
SRR8909000	CDS_syn	ABEmax	D	23077			SRR11561316	CDS_syn	BE4-PpAPOBEC1	E	21
SRR8909000	Intronic	ABEmax	D	102651			SRR11561316	UTR5	BE4-PpAPOBEC1	E	9
SRR8909000	Other	ABEmax	D	59432			SRR11561316	UTR3	BE4-PpAPOBEC1	E	149
SRR8909000	UTR3	ABEmax	D	117166			SRR11561316	Intronic	BE4-PpAPOBEC1	E	26
SRR8909000	UTR5	ABEmax	D	3678			SRR11561316	Other	BE4-PpAPOBEC1	E	73
SRR8909001	Intronic	miniABEmax	D	73034			SRR11561317	CDS_nonsyn	BE4-rAPOBEC1-K34A-H122A	E	0
SRR8909001	CDS_nonsyn	miniABEmax	D	120744			SRR11561317	CDS_syn	BE4-rAPOBEC1-K34A-H122A	E	0
SRR8909001	UTR3	miniABEmax	D	190611			SRR11561317	UTR5	BE4-rAPOBEC1-K34A-H122A	E	0
SRR8909001	UTR5	miniABEmax	D	5959			SRR11561317	UTR3	BE4-rAPOBEC1-K34A-H122A	E	0
SRR8909001	Other	miniABEmax	D	46217			SRR11561317	Intronic	BE4-rAPOBEC1-K34A-H122A	E	0
SRR8909001	CDS_syn	miniABEmax	D	37413			SRR11561317	Other	BE4-rAPOBEC1-K34A-H122A	E	10
SRR8909005	CDS_syn	ABEmax	D	11620			SRR11561318	CDS_nonsyn	BE4-rAPOBEC1-K34A-H122A	E	0
SRR8909005	CDS_nonsyn	ABEmax	D	38371			SRR11561318	CDS_syn	BE4-rAPOBEC1-K34A-H122A	E	0
SRR8909005	UTR3	ABEmax	D	67162			SRR11561318	UTR5	BE4-rAPOBEC1-K34A-H122A	E	0
SRR8909005	UTR5	ABEmax	D	1785			SRR11561318	UTR3	BE4-rAPOBEC1-K34A-H122A	E	0
SRR8909005	Other	ABEmax	D	37704			SRR11561318	Intronic	BE4-rAPOBEC1-K34A-H122A	E	0
SRR8909005	Intronic	ABEmax	D	60991			SRR11561318	Other	BE4-rAPOBEC1-K34A-H122A	E	11
SRR8909006	UTR3	miniABEmax	D	189179			SRR11561321	CDS_nonsyn	BE4-rAPOBEC1-K34A-H122A	E	15
SRR8909006	UTR5	miniABEmax	D	5196			SRR11561321	CDS_syn	BE4-rAPOBEC1-K34A-H122A	E	0
SRR8909006	CDS_syn	miniABEmax	D	34438			SRR11561321	UTR5	BE4-rAPOBEC1-K34A-H122A	E	0
SRR8909006	Other	miniABEmax	D	53798			SRR11561321	UTR3	BE4-rAPOBEC1-K34A-H122A	E	143
SRR8909006	Intronic	miniABEmax	D	82507			SRR11561321	Intronic	BE4-rAPOBEC1-K34A-H122A	E	108
SRR8909006	CDS_nonsyn	miniABEmax	D	110308			SRR11561321	Other	BE4-rAPOBEC1-K34A-H122A	E	41
SRR8909007	UTR5	K20A/R21A	D	300			SRR11561322	CDS_syn	BE4-rAPOBEC1-K34A-H122A	E	14
SRR8909007	CDS_syn	K20A/R21A	D	1153			SRR11561322	CDS_nonsyn	BE4-rAPOBEC1-K34A-H122A	E	31
SRR8909007	Other	K20A/R21A	D	38569			SRR11561322	UTR5	BE4-rAPOBEC1-K34A-H122A	E	11
SRR8909007	UTR3	K20A/R21A	D	21136			SRR11561322	UTR3	BE4-rAPOBEC1-K34A-H122A	E	90
SRR8909007	CDS_nonsyn	K20A/R21A	D	3531			SRR11561322	Intronic	BE4-rAPOBEC1-K34A-H122A	E	57
SRR8909007	Intronic	K20A/R21A	D	70884			SRR11561322	Other	BE4-rAPOBEC1-K34A-H122A	E	92
SRR8909008	Intronic	V82G	D	86735			SRR11561323	UTR5	BE4-rAPOBEC1	E	1589
SRR8909008	CDS_syn	V82G	D	1072			SRR11561323	UTR3	BE4-rAPOBEC1	E	113010
SRR8909008	CDS_nonsyn	V82G	D	2983			SRR11561323	CDS_syn	BE4-rAPOBEC1	E	15913
SRR8909008	UTR3	V82G	D	22440			SRR11561323	CDS_nonsyn	BE4-rAPOBEC1	E	19217
SRR8909008	UTR5	V82G	D	384			SRR11561323	Intronic	BE4-rAPOBEC1	E	22165
SRR8909008	Other	V82G	D	46790			SRR11561323	Other	BE4-rAPOBEC1	E	15793
SRR8909009	CDS_syn	GFP	D	120			SRR11561324	UTR3	BE4-rAPOBEC1	E	112406
SRR8909009	CDS_nonsyn	GFP	D	262			SRR11561324	UTR5	BE4-rAPOBEC1	E	1534
SRR8909009	UTR3	GFP	D	24100			SRR11561324	Intronic	BE4-rAPOBEC1	E	23049
SRR8909009	UTR5	GFP	D	265			SRR11561324	CDS_syn	BE4-rAPOBEC1	E	16402
SRR8909009	Other	GFP	D	46896			SRR11561324	CDS_nonsyn	BE4-rAPOBEC1	E	19303
SRR8909009	Intronic	GFP	D	96532			SRR11561324	Other	BE4-rAPOBEC1	E	15843
SRR8909011	UTR3	ABEmax	D	73850			SRR11561325	Intronic	nCas9	E	10
SRR8909011	Other	ABEmax	D	46627			SRR11561325	CDS_nonsyn	nCas9	E	31
SRR8909011	CDS_nonsyn	ABEmax	D	41878			SRR11561325	UTR3	nCas9	E	121
SRR8909011	UTR5	ABEmax	D	1963			SRR11561325	UTR5	nCas9	E	0
SRR8909011	CDS_syn	ABEmax	D	12533			SRR11561325	CDS_syn	nCas9	E	25
SRR8909011	Intronic	ABEmax	D	76517			SRR11561325	Other	nCas9	E	11
SRR8909012	Other	miniABEmax	D	39536			SRR11561326	Other	nCas9	E	4
SRR8909012	CDS_syn	miniABEmax	D	24673			SRR11561326	Intronic	nCas9	E	0
SRR8909012	CDS_nonsyn	miniABEmax	D	78003			SRR11561326	UTR3	nCas9	E	143
SRR8909012	Intronic	miniABEmax	D	59635			SRR11561326	UTR5	nCas9	E	9
SRR8909012	UTR3	miniABEmax	D	147608			SRR11561326	CDS_syn	nCas9	E	34
SRR8909012	UTR5	miniABEmax	D	3575			SRR11561326	CDS_nonsyn	nCas9	E	28
SRR8909013	CDS_nonsyn	K20A/R21A	D	2222			SRR8790747	CDS_nonsyn	BE3-site 3	H	461
SRR8909013	Other	K20A/R21A	D	19653			SRR8790747	Intronic	BE3-site 3	H	695
SRR8909013	Intronic	K20A/R21A	D	35664			SRR8790747	Other	BE3-site 3	H	1708
SRR8909013	CDS_syn	K20A/R21A	D	687			SRR8790747	UTR5	BE3-site 3	H	78
SRR8909013	UTR5	K20A/R21A	D	198			SRR8790747	UTR3	BE3-site 3	H	7376
SRR8909013	UTR3	K20A/R21A	D	12696			SRR8790747	CDS_syn	BE3-site 3	H	385
SRR8909014	UTR5	V82G	D	182			SRR8790748	Other	BE3(W90A)-site 3	H	0
SRR8909014	CDS_syn	V82G	D	737			SRR8790748	CDS_syn	BE3(W90A)-site 3	H	0
SRR8909014	UTR3	V82G	D	16369			SRR8790748	CDS_nonsyn	BE3(W90A)-site 3	H	0
SRR8909014	Intronic	V82G	D	56593			SRR8790748	UTR5	BE3(W90A)-site 3	H	0
SRR8909014	CDS_nonsyn	V82G	D	2100			SRR8790748	UTR3	BE3(W90A)-site 3	H	0
SRR8909014	Other	V82G	D	30030			SRR8790748	Intronic	BE3(W90A)-site 3	H	0
SRR8909015	UTR5	GFP	D	123			SRR8790749	CDS_syn	BE3(W90A)-site 3	H	0
SRR8909015	UTR3	GFP	D	16184			SRR8790749	CDS_nonsyn	BE3(W90A)-site 3	H	0
SRR8909015	Intronic	GFP	D	50726			SRR8790749	UTR5	BE3(W90A)-site 3	H	0
SRR8909015	CDS_syn	GFP	D	58			SRR8790749	UTR3	BE3(W90A)-site 3	H	0
SRR8909015	Other	GFP	D	25127			SRR8790749	Other	BE3(W90A)-site 3	H	0
SRR8909015	CDS_nonsyn	GFP	D	106			SRR8790749	Intronic	BE3(W90A)-site 3	H	0
SRR8909017	Other	ABEmax	D	60826			SRR8790752	UTR5	APOBEC1	H	567
SRR8909017	Intronic	ABEmax	D	99701			SRR8790752	UTR3	APOBEC1	H	35290
SRR8909017	CDS_nonsyn	ABEmax	D	54223			SRR8790752	CDS_syn	APOBEC1	H	2933
SRR8909017	UTR5	ABEmax	D	2423			SRR8790752	CDS_nonsyn	APOBEC1	H	3985
SRR8909017	CDS_syn	ABEmax	D	16564			SRR8790752	Intronic	APOBEC1	H	10784
SRR8909017	UTR3	ABEmax	D	91327			SRR8790752	Other	APOBEC1	H	16063
SRR8909018	CDS_nonsyn	miniABEmax	D	120208			SRR8790754	CDS_syn	APOBEC1	H	3024
SRR8909018	UTR5	miniABEmax	D	5902			SRR8790754	Other	APOBEC1	H	14152
SRR8909018	CDS_syn	miniABEmax	D	37715			SRR8790754	Intronic	APOBEC1	H	8478
SRR8909018	Intronic	miniABEmax	D	92678			SRR8790754	UTR5	APOBEC1	H	634
SRR8909018	UTR3	miniABEmax	D	209356			SRR8790754	UTR3	APOBEC1	H	34793
SRR8909018	Other	miniABEmax	D	56989			SRR8790754	CDS_nonsyn	APOBEC1	H	3919
SRR8909019	UTR5	K20A/R21A	D	557			SRR8790755	UTR3	APOBEC1	H	46885
SRR8909019	CDS_syn	K20A/R21A	D	2030			SRR8790755	CDS_syn	APOBEC1	H	4135
SRR8909019	Intronic	K20A/R21A	D	91847			SRR8790755	UTR5	APOBEC1	H	1069
SRR8909019	CDS_nonsyn	K20A/R21A	D	6012			SRR8790755	Other	APOBEC1	H	20735
SRR8909019	UTR3	K20A/R21A	D	25857			SRR8790755	CDS_nonsyn	APOBEC1	H	5651
SRR8909019	Other	K20A/R21A	D	46069			SRR8790755	Intronic	APOBEC1	H	14487
SRR8909020	UTR3	V82G	D	12302			SRR8790756	UTR5	GFP	H	0
SRR8909020	CDS_syn	V82G	D	655			SRR8790756	Other	GFP	H	0
SRR8909020	UTR5	V82G	D	206			SRR8790756	CDS_nonsyn	GFP	H	0
SRR8909020	Other	V82G	D	23170			SRR8790756	UTR3	GFP	H	0
SRR8909020	Intronic	V82G	D	47076			SRR8790756	Intronic	GFP	H	0
SRR8909020	CDS_nonsyn	V82G	D	1888			SRR8790756	CDS_syn	GFP	H	0
SRR8910104	Intronic	GFP	D	6592			SRR8790757	UTR5	GFP	H	0
SRR8910104	UTR3	GFP	D	2790			SRR8790757	Intronic	GFP	H	0
SRR8910104	UTR5	GFP	D	23			SRR8790757	CDS_nonsyn	GFP	H	0
SRR8910104	Other	GFP	D	2689			SRR8790757	CDS_syn	GFP	H	0
SRR8910104	CDS_syn	GFP	D	18			SRR8790757	UTR3	GFP	H	0
SRR8910104	CDS_nonsyn	GFP	D	21			SRR8790757	Other	GFP	H	0
SRR6951146	Other	ctrl	F	1707			SRR8790758	CDS_syn	BE3-site 3	H	194
SRR6951146	Intronic	ctrl	F	2301			SRR8790758	Intronic	BE3-site 3	H	571
SRR6951146	UTR3	ctrl	F	1096			SRR8790758	Other	BE3-site 3	H	1234
SRR6951146	UTR5	ctrl	F	9			SRR8790758	UTR5	BE3-site 3	H	52
SRR6951146	CDS_syn	ctrl	F	8			SRR8790758	UTR3	BE3-site 3	H	5574
SRR6951146	CDS_nonsyn	ctrl	F	14			SRR8790758	CDS_nonsyn	BE3-site 3	H	258
SRR6951147	CDS_nonsyn	ctrl	F	5			SRR8790759	Other	BE3-RNF2	H	2314
SRR6951147	Intronic	ctrl	F	2255			SRR8790759	CDS_syn	BE3-RNF2	H	526
SRR6951147	UTR3	ctrl	F	1032			SRR8790759	UTR3	BE3-RNF2	H	9895
SRR6951147	UTR5	ctrl	F	19			SRR8790759	UTR5	BE3-RNF2	H	66
SRR6951147	Other	ctrl	F	1402			SRR8790759	Intronic	BE3-RNF2	H	866
SRR6951147	CDS_syn	ctrl	F	7			SRR8790759	CDS_nonsyn	BE3-RNF2	H	710
SRR6951148	CDS_nonsyn	SA1+gRNA	F	5			SRR8790760	Other	BE3-RNF2	H	1930
SRR6951148	Other	SA1+gRNA	F	1817			SRR8790760	UTR5	BE3-RNF2	H	79
SRR6951148	Intronic	SA1+gRNA	F	2448			SRR8790760	UTR3	BE3-RNF2	H	7257
SRR6951148	CDS_syn	SA1+gRNA	F	2			SRR8790760	CDS_nonsyn	BE3-RNF2	H	612
SRR6951148	UTR3	SA1+gRNA	F	1090			SRR8790760	CDS_syn	BE3-RNF2	H	455
SRR6951148	UTR5	SA1+gRNA	F	13			SRR8790760	Intronic	BE3-RNF2	H	749
SRR6951149	CDS_nonsyn	SA1+gRNA	F	15			SRR8790761	CDS_nonsyn	BE3-RNF2	H	472
SRR6951149	CDS_syn	SA1+gRNA	F	6			SRR8790761	UTR5	BE3-RNF2	H	96
SRR6951149	Other	SA1+gRNA	F	1588			SRR8790761	Intronic	BE3-RNF2	H	669
SRR6951149	Intronic	SA1+gRNA	F	2752			SRR8790761	Other	BE3-RNF2	H	1792
SRR6951149	UTR5	SA1+gRNA	F	0			SRR8790761	CDS_syn	BE3-RNF2	H	394
SRR6951149	UTR3	SA1+gRNA	F	985			SRR8790761	UTR3	BE3-RNF2	H	8479
SRR6951150	CDS_nonsyn	SA2+gRNA	F	5			SRR8790768	CDS_nonsyn	BE3(hA3A)-site 3	H	8
SRR6951150	CDS_syn	SA2+gRNA	F	1			SRR8790768	CDS_syn	BE3(hA3A)-site 3	H	3
SRR6951150	UTR5	SA2+gRNA	F	5			SRR8790768	UTR3	BE3(hA3A)-site 3	H	16
SRR6951150	UTR3	SA2+gRNA	F	1075			SRR8790768	Other	BE3(hA3A)-site 3	H	25
SRR6951150	Other	SA2+gRNA	F	1548			SRR8790768	UTR5	BE3(hA3A)-site 3	H	13
SRR6951150	Intronic	SA2+gRNA	F	2193			SRR8790768	Intronic	BE3(hA3A)-site 3	H	0
SRR6951151	CDS_nonsyn	SA2+gRNA	F	23			SRR8790769	CDS_syn	BE3(hA3A)-site 3	H	0
SRR6951151	CDS_syn	SA2+gRNA	F	18			SRR8790769	CDS_nonsyn	BE3(hA3A)-site 3	H	0
SRR6951151	UTR5	SA2+gRNA	F	31			SRR8790769	UTR5	BE3(hA3A)-site 3	H	0
SRR6951151	UTR3	SA2+gRNA	F	998			SRR8790769	UTR3	BE3(hA3A)-site 3	H	0
SRR6951151	Intronic	SA2+gRNA	F	2426			SRR8790769	Other	BE3(hA3A)-site 3	H	21
SRR6951151	Other	SA2+gRNA	F	1369			SRR8790769	Intronic	BE3(hA3A)-site 3	H	7
SRR6951152	CDS_nonsyn	SA1Q	F	6			SRR8790770	CDS_syn	BE3(hA3A)-site 3	H	10
SRR6951152	CDS_syn	SA1Q	F	8			SRR8790770	UTR5	BE3(hA3A)-site 3	H	2
SRR6951152	UTR5	SA1Q	F	6			SRR8790770	UTR3	BE3(hA3A)-site 3	H	37
SRR6951152	UTR3	SA1Q	F	1303			SRR8790770	Other	BE3(hA3A)-site 3	H	33
SRR6951152	Intronic	SA1Q	F	2809			SRR8790770	Intronic	BE3(hA3A)-site 3	H	37
SRR6951152	Other	SA1Q	F	1838			SRR8790770	CDS_nonsyn	BE3(hA3A)-site 3	H	14
SRR6951153	CDS_nonsyn	SA1Q	F	18			SRR8790771	Intronic	BE3(W90A)-site 3	H	11
SRR6951153	CDS_syn	SA1Q	F	11			SRR8790771	UTR5	BE3(W90A)-site 3	H	0
SRR6951153	UTR5	SA1Q	F	2			SRR8790771	UTR3	BE3(W90A)-site 3	H	19
SRR6951153	UTR3	SA1Q	F	1141			SRR8790771	CDS_nonsyn	BE3(W90A)-site 3	H	0
SRR6951153	Intronic	SA1Q	F	2573			SRR8790771	CDS_syn	BE3(W90A)-site 3	H	0
SRR6951153	Other	SA1Q	F	1656			SRR8790771	Other	BE3(W90A)-site 3	H	2
SRR6951154	CDS_nonsyn	SA2Q	F	30			SRR8790772	UTR5	GFP	H	0
SRR6951154	CDS_syn	SA2Q	F	13			SRR8790772	Other	GFP	H	0
SRR6951154	UTR5	SA2Q	F	24			SRR8790772	CDS_nonsyn	GFP	H	0
SRR6951154	UTR3	SA2Q	F	2114			SRR8790772	CDS_syn	GFP	H	0
SRR6951154	Intronic	SA2Q	F	3921			SRR8790772	UTR3	GFP	H	0
SRR6951154	Other	SA2Q	F	2806			SRR8790772	Intronic	GFP	H	0
SRR6951155	CDS_syn	SA2Q	F	19			SRR8790773	UTR3	GFP	H	0
SRR6951155	CDS_nonsyn	SA2Q	F	47			SRR8790773	Other	GFP	H	0
SRR6951155	UTR5	SA2Q	F	37			SRR8790773	Intronic	GFP	H	0
SRR6951155	UTR3	SA2Q	F	2051			SRR8790773	CDS_nonsyn	GFP	H	0
SRR6951155	Intronic	SA2Q	F	3515			SRR8790773	CDS_syn	GFP	H	0
SRR6951155	Other	SA2Q	F	2600			SRR8790773	UTR5	GFP	H	0
SRR6951156	UTR5	SA1Q+gRNA	F	45			SRR8790776	UTR3	GFP	H	0
SRR6951156	UTR3	SA1Q+gRNA	F	1776			SRR8790776	Intronic	GFP	H	0
SRR6951156	CDS_syn	SA1Q+gRNA	F	10			SRR8790776	UTR5	GFP	H	0
SRR6951156	CDS_nonsyn	SA1Q+gRNA	F	33			SRR8790776	Other	GFP	H	0
SRR6951156	Intronic	SA1Q+gRNA	F	4803			SRR8790776	CDS_syn	GFP	H	0
SRR6951156	Other	SA1Q+gRNA	F	2750			SRR8790776	CDS_nonsyn	GFP	H	0
SRR6951157	UTR3	SA1Q+gRNA	F	2330			SRR8790777	Intronic	GFP	H	20
SRR6951157	UTR5	SA1Q+gRNA	F	36			SRR8790777	CDS_nonsyn	GFP	H	6
SRR6951157	Intronic	SA1Q+gRNA	F	6265			SRR8790777	UTR3	GFP	H	26
SRR6951157	CDS_syn	SA1Q+gRNA	F	17			SRR8790777	CDS_syn	GFP	H	0
SRR6951157	CDS_nonsyn	SA1Q+gRNA	F	43			SRR8790777	UTR5	GFP	H	0
SRR6951157	Other	SA1Q+gRNA	F	3835			SRR8790777	Other	GFP	H	10
SRR6951158	Intronic	SA2Q+gRNA	F	9931			SRR8790778	UTR5	BE3	H	282
SRR6951158	CDS_nonsyn	SA2Q+gRNA	F	92			SRR8790778	Other	BE3	H	5203
SRR6951158	UTR3	SA2Q+gRNA	F	3832			SRR8790778	CDS_nonsyn	BE3	H	1779
SRR6951158	UTR5	SA2Q+gRNA	F	55			SRR8790778	UTR3	BE3	H	20923
SRR6951158	CDS_syn	SA2Q+gRNA	F	35			SRR8790778	Intronic	BE3	H	1867
SRR6951158	Other	SA2Q+gRNA	F	5911			SRR8790778	CDS_syn	BE3	H	1344
SRR6951159	Other	SA2Q+gRNA	F	5884			SRR8790779	Intronic	BE3	H	2168
SRR6951159	Intronic	SA2Q+gRNA	F	9368			SRR8790779	UTR5	BE3	H	200
SRR6951159	UTR3	SA2Q+gRNA	F	3845			SRR8790779	CDS_nonsyn	BE3	H	1729
SRR6951159	UTR5	SA2Q+gRNA	F	46			SRR8790779	CDS_syn	BE3	H	1361
SRR6951159	CDS_syn	SA2Q+gRNA	F	31			SRR8790779	Other	BE3	H	6092
SRR6951159	CDS_nonsyn	SA2Q+gRNA	F	65			SRR8790779	UTR3	BE3	H	23379
SRR8326916	Other	293T	G	2744			SRR8790781	CDS_nonsyn	BE3	H	916
SRR8326916	UTR3	293T	G	1919			SRR8790781	Other	BE3	H	3843
SRR8326916	CDS_syn	293T	G	108			SRR8790781	UTR3	BE3	H	17174
SRR8326916	Intronic	293T	G	3839			SRR8790781	Intronic	BE3	H	1275
SRR8326916	CDS_nonsyn	293T	G	310			SRR8790781	UTR5	BE3	H	93
SRR8326916	UTR5	293T	G	36			SRR8790781	CDS_syn	BE3	H	734
SRR8326918	Other	MCP-ADAR1 DD-NES - MS2 adRNA	G	17820			SRR9027793	Intronic	BE3(hA3AR128A)-site 3	H	0
SRR8326918	UTR5	MCP-ADAR1 DD-NES - MS2 adRNA	G	2271			SRR9027793	CDS_syn	BE3(hA3AR128A)-site 3	H	1
SRR8326918	CDS_nonsyn	MCP-ADAR1 DD-NES - MS2 adRNA	G	42853			SRR9027793	UTR5	BE3(hA3AR128A)-site 3	H	0
SRR8326918	UTR3	MCP-ADAR1 DD-NES - MS2 adRNA	G	81439			SRR9027793	Other	BE3(hA3AR128A)-site 3	H	3
SRR8326918	CDS_syn	MCP-ADAR1 DD-NES - MS2 adRNA	G	15220			SRR9027793	CDS_nonsyn	BE3(hA3AR128A)-site 3	H	1
SRR8326918	Intronic	MCP-ADAR1 DD-NES - MS2 adRNA	G	16595			SRR9027793	UTR3	BE3(hA3AR128A)-site 3	H	28
SRR8326919	CDS_nonsyn	MCP-ADAR1 DD-NES + MS2 adRNA	G	110232			SRR9027794	CDS_syn	BE3(hA3AR128A)-site 3	H	0
SRR8326919	Intronic	MCP-ADAR1 DD-NES + MS2 adRNA	G	52399			SRR9027794	Other	BE3(hA3AR128A)-site 3	H	0
SRR8326919	Other	MCP-ADAR1 DD-NES + MS2 adRNA	G	51111			SRR9027794	CDS_nonsyn	BE3(hA3AR128A)-site 3	H	0
SRR8326919	UTR3	MCP-ADAR1 DD-NES + MS2 adRNA	G	206554			SRR9027794	UTR3	BE3(hA3AR128A)-site 3	H	0
SRR8326919	CDS_syn	MCP-ADAR1 DD-NES + MS2 adRNA	G	38978			SRR9027794	Intronic	BE3(hA3AR128A)-site 3	H	9
SRR8326919	UTR5	MCP-ADAR1 DD-NES + MS2 adRNA	G	6314			SRR9027794	UTR5	BE3(hA3AR128A)-site 3	H	0
SRR8326920	UTR5	MCP-ADAR1 DD-NLS - MS2 adRNA	G	396			SRR9027800	CDS_syn	BE3(W90Y/R126E)-site 3	H	3
SRR8326920	Other	MCP-ADAR1 DD-NLS - MS2 adRNA	G	6670			SRR9027800	CDS_nonsyn	BE3(W90Y/R126E)-site 3	H	2
SRR8326920	UTR3	MCP-ADAR1 DD-NLS - MS2 adRNA	G	9464			SRR9027800	UTR5	BE3(W90Y/R126E)-site 3	H	0
SRR8326920	CDS_syn	MCP-ADAR1 DD-NLS - MS2 adRNA	G	2426			SRR9027800	UTR3	BE3(W90Y/R126E)-site 3	H	7
SRR8326920	Intronic	MCP-ADAR1 DD-NLS - MS2 adRNA	G	9526			SRR9027800	Other	BE3(W90Y/R126E)-site 3	H	4
SRR8326920	CDS_nonsyn	MCP-ADAR1 DD-NLS - MS2 adRNA	G	6610			SRR9027800	Intronic	BE3(W90Y/R126E)-site 3	H	0
SRR8326921	CDS_syn	MCP-ADAR1 DD-NLS + MS2 adRNA	G	6514			SRR9027801	CDS_syn	BE3(W90Y/R126E)-site 3	H	0
SRR8326921	Other	MCP-ADAR1 DD-NLS + MS2 adRNA	G	21228			SRR9027801	UTR5	BE3(W90Y/R126E)-site 3	H	0
SRR8326921	UTR3	MCP-ADAR1 DD-NLS + MS2 adRNA	G	28109			SRR9027801	UTR3	BE3(W90Y/R126E)-site 3	H	8
SRR8326921	Intronic	MCP-ADAR1 DD-NLS + MS2 adRNA	G	29529			SRR9027801	Other	BE3(W90Y/R126E)-site 3	H	0
SRR8326921	CDS_nonsyn	MCP-ADAR1 DD-NLS + MS2 adRNA	G	18469			SRR9027801	Intronic	BE3(W90Y/R126E)-site 3	H	0
SRR8326921	UTR5	MCP-ADAR1 DD-NLS + MS2 adRNA	G	1101			SRR9027801	CDS_nonsyn	BE3(W90Y/R126E)-site 3	H	0
SRR8326922	CDS_syn	MCP-ADAR1 DD (E1008Q)-NES - MS2 adRNA	G	28110			SRR9027802	Intronic	BE3(hA3AR128A)-site 3	H	0
SRR8326922	Intronic	MCP-ADAR1 DD (E1008Q)-NES - MS2 adRNA	G	28231			SRR9027802	UTR5	BE3(hA3AR128A)-site 3	H	0
SRR8326922	UTR3	MCP-ADAR1 DD (E1008Q)-NES - MS2 adRNA	G	136247			SRR9027802	UTR3	BE3(hA3AR128A)-site 3	H	0
SRR8326922	UTR5	MCP-ADAR1 DD (E1008Q)-NES - MS2 adRNA	G	4638			SRR9027802	CDS_nonsyn	BE3(hA3AR128A)-site 3	H	0
SRR8326922	Other	MCP-ADAR1 DD (E1008Q)-NES - MS2 adRNA	G	25884			SRR9027802	CDS_syn	BE3(hA3AR128A)-site 3	H	0
SRR8326922	CDS_nonsyn	MCP-ADAR1 DD (E1008Q)-NES - MS2 adRNA	G	87373			SRR9027802	Other	BE3(hA3AR128A)-site 3	H	0
SRR8326923	CDS_nonsyn	MCP-ADAR1 DD (E1008Q)-NES + MS2 adRNA	G	249380			SRR9027807	UTR3	BE3(hA3AY130F)-site 3	H	0
SRR8326923	CDS_syn	MCP-ADAR1 DD (E1008Q)-NES + MS2 adRNA	G	80168			SRR9027807	Intronic	BE3(hA3AY130F)-site 3	H	0
SRR8326923	UTR5	MCP-ADAR1 DD (E1008Q)-NES + MS2 adRNA	G	15107			SRR9027807	UTR5	BE3(hA3AY130F)-site 3	H	0
SRR8326923	Intronic	MCP-ADAR1 DD (E1008Q)-NES + MS2 adRNA	G	108979			SRR9027807	Other	BE3(hA3AY130F)-site 3	H	0
SRR8326923	Other	MCP-ADAR1 DD (E1008Q)-NES + MS2 adRNA	G	92118			SRR9027807	CDS_syn	BE3(hA3AY130F)-site 3	H	0
SRR8326923	UTR3	MCP-ADAR1 DD (E1008Q)-NES + MS2 adRNA	G	372694			SRR9027807	CDS_nonsyn	BE3(hA3AY130F)-site 3	H	0
SRR8326924	UTR5	MCP-ADAR1 DD (E1008Q)-NLS - MS2 adRNA	G	4742			SRR9027808	Intronic	BE3(hA3AY130F)-site 3	H	8
SRR8326924	UTR3	MCP-ADAR1 DD (E1008Q)-NLS - MS2 adRNA	G	84189			SRR9027808	CDS_nonsyn	BE3(hA3AY130F)-site 3	H	0
SRR8326924	Intronic	MCP-ADAR1 DD (E1008Q)-NLS - MS2 adRNA	G	61080			SRR9027808	UTR3	BE3(hA3AY130F)-site 3	H	49
SRR8326924	Other	MCP-ADAR1 DD (E1008Q)-NLS - MS2 adRNA	G	43841			SRR9027808	CDS_syn	BE3(hA3AY130F)-site 3	H	0
SRR8326924	CDS_syn	MCP-ADAR1 DD (E1008Q)-NLS - MS2 adRNA	G	23643			SRR9027808	UTR5	BE3(hA3AY130F)-site 3	H	0
SRR8326924	CDS_nonsyn	MCP-ADAR1 DD (E1008Q)-NLS - MS2 adRNA	G	78640			SRR9027808	Other	BE3(hA3AY130F)-site 3	H	4
SRR8326925	UTR5	MCP-ADAR1 DD (E1008Q)-NLS +MS2 adRNA	G	6493			SRR9027810	Intronic	BE3(hA3AY130F)-site 3	H	0
SRR8326925	UTR3	MCP-ADAR1 DD (E1008Q)-NLS +MS2 adRNA	G	123175			SRR9027810	UTR5	BE3(hA3AY130F)-site 3	H	0
SRR8326925	Other	MCP-ADAR1 DD (E1008Q)-NLS +MS2 adRNA	G	57364			SRR9027810	CDS_nonsyn	BE3(hA3AY130F)-site 3	H	0
SRR8326925	CDS_syn	MCP-ADAR1 DD (E1008Q)-NLS +MS2 adRNA	G	32427			SRR9027810	CDS_syn	BE3(hA3AY130F)-site 3	H	0
SRR8326925	CDS_nonsyn	MCP-ADAR1 DD (E1008Q)-NLS +MS2 adRNA	G	105467			SRR9027810	Other	BE3(hA3AY130F)-site 3	H	0
SRR8326925	Intronic	MCP-ADAR1 DD (E1008Q)-NLS +MS2 adRNA	G	87709			SRR9027810	UTR3	BE3(hA3AY130F)-site 3	H	0
SRR8326926	UTR3	MCP-ADAR2 DD-NES - MS2 adRNA	G	13678			SRR8096298	CDS_nonsyn	BE3-E63Q	I	8
SRR8326926	CDS_syn	MCP-ADAR2 DD-NES - MS2 adRNA	G	1192			SRR8096298	UTR3	BE3-E63Q	I	22
SRR8326926	UTR5	MCP-ADAR2 DD-NES - MS2 adRNA	G	271			SRR8096298	UTR5	BE3-E63Q	I	0
SRR8326926	CDS_nonsyn	MCP-ADAR2 DD-NES - MS2 adRNA	G	4459			SRR8096298	Intronic	BE3-E63Q	I	71
SRR8326926	Other	MCP-ADAR2 DD-NES - MS2 adRNA	G	23612			SRR8096298	Other	BE3-E63Q	I	89
SRR8326926	Intronic	MCP-ADAR2 DD-NES - MS2 adRNA	G	26890			SRR8096298	CDS_syn	BE3-E63Q	I	12
SRR8326927	Other	MCP-ADAR2 DD-NES + MS2 adRNA	G	10870			SRR8096300	Other	BE3-E63Q	I	68
SRR8326927	Intronic	MCP-ADAR2 DD-NES + MS2 adRNA	G	11974			SRR8096300	Intronic	BE3-E63Q	I	78
SRR8326927	CDS_nonsyn	MCP-ADAR2 DD-NES + MS2 adRNA	G	4274			SRR8096300	UTR5	BE3-E63Q	I	0
SRR8326927	UTR3	MCP-ADAR2 DD-NES + MS2 adRNA	G	9896			SRR8096300	UTR3	BE3-E63Q	I	13
SRR8326927	UTR5	MCP-ADAR2 DD-NES + MS2 adRNA	G	196			SRR8096300	CDS_nonsyn	BE3-E63Q	I	3
SRR8326927	CDS_syn	MCP-ADAR2 DD-NES + MS2 adRNA	G	1249			SRR8096300	CDS_syn	BE3-E63Q	I	5
SRR8326928	Intronic	MCP-ADAR2 DD (E488Q)-NES - MS2 adRNA	G	37006			SRR8096302	UTR3	BE3	I	409446
SRR8326928	UTR5	MCP-ADAR2 DD (E488Q)-NES - MS2 adRNA	G	1308			SRR8096302	Other	BE3	I	94390
SRR8326928	CDS_syn	MCP-ADAR2 DD (E488Q)-NES - MS2 adRNA	G	7254			SRR8096302	UTR5	BE3	I	10874
SRR8326928	UTR3	MCP-ADAR2 DD (E488Q)-NES - MS2 adRNA	G	33744			SRR8096302	CDS_nonsyn	BE3	I	146871
SRR8326928	Other	MCP-ADAR2 DD (E488Q)-NES - MS2 adRNA	G	31244			SRR8096302	CDS_syn	BE3	I	117040
SRR8326928	CDS_nonsyn	MCP-ADAR2 DD (E488Q)-NES - MS2 adRNA	G	27204			SRR8096302	Intronic	BE3	I	65594
SRR8326929	Intronic	MCP-ADAR2 DD (E488Q)-NES + MS2 adRNA	G	35911			SRR8096303	Intronic	BE3-R33A	I	230
SRR8326929	UTR5	MCP-ADAR2 DD (E488Q)-NES + MS2 adRNA	G	1674			SRR8096303	CDS_syn	BE3-R33A	I	62
SRR8326929	CDS_syn	MCP-ADAR2 DD (E488Q)-NES + MS2 adRNA	G	8855			SRR8096303	CDS_nonsyn	BE3-R33A	I	60
SRR8326929	UTR3	MCP-ADAR2 DD (E488Q)-NES + MS2 adRNA	G	39254			SRR8096303	UTR5	BE3-R33A	I	0
SRR8326929	Other	MCP-ADAR2 DD (E488Q)-NES + MS2 adRNA	G	29784			SRR8096303	Other	BE3-R33A	I	236
SRR8326929	CDS_nonsyn	MCP-ADAR2 DD (E488Q)-NES + MS2 adRNA	G	32536			SRR8096303	UTR3	BE3-R33A	I	366
SRR8326930	UTR3	MCP-ADAR2 DD-NLS - MS2 adRNA	G	12626			SRR8096304	Other	BE3-R33A/K34A	I	89
SRR8326930	CDS_nonsyn	MCP-ADAR2 DD-NLS - MS2 adRNA	G	6930			SRR8096304	Intronic	BE3-R33A/K34A	I	88
SRR8326930	CDS_syn	MCP-ADAR2 DD-NLS - MS2 adRNA	G	2320			SRR8096304	UTR5	BE3-R33A/K34A	I	0
SRR8326930	Intronic	MCP-ADAR2 DD-NLS - MS2 adRNA	G	18441			SRR8096304	CDS_syn	BE3-R33A/K34A	I	11
SRR8326930	Other	MCP-ADAR2 DD-NLS - MS2 adRNA	G	14109			SRR8096304	CDS_nonsyn	BE3-R33A/K34A	I	4
SRR8326930	UTR5	MCP-ADAR2 DD-NLS - MS2 adRNA	G	346			SRR8096304	UTR3	BE3-R33A/K34A	I	13
SRR8326931	Other	MCP-ADAR2 DD-NLS + MS2 adRNA	G	18851			SRR8096306	CDS_syn	BE3	I	164676
SRR8326931	CDS_nonsyn	MCP-ADAR2 DD-NLS + MS2 adRNA	G	3964			SRR8096306	CDS_nonsyn	BE3	I	208309
SRR8326931	UTR5	MCP-ADAR2 DD-NLS + MS2 adRNA	G	273			SRR8096306	UTR5	BE3	I	15730
SRR8326931	Intronic	MCP-ADAR2 DD-NLS + MS2 adRNA	G	24664			SRR8096306	Other	BE3	I	139197
SRR8326931	UTR3	MCP-ADAR2 DD-NLS + MS2 adRNA	G	10728			SRR8096306	Intronic	BE3	I	102595
SRR8326931	CDS_syn	MCP-ADAR2 DD-NLS + MS2 adRNA	G	1307			SRR8096306	UTR3	BE3	I	558408
SRR8326932	Other	MCP-ADAR2 DD (E488Q)-NLS - MS2 adRNA	G	19922			SRR8096307	Intronic	BE3-R33A	I	213
SRR8326932	CDS_nonsyn	MCP-ADAR2 DD (E488Q)-NLS - MS2 adRNA	G	16509			SRR8096307	UTR3	BE3-R33A	I	307
SRR8326932	UTR5	MCP-ADAR2 DD (E488Q)-NLS - MS2 adRNA	G	772			SRR8096307	Other	BE3-R33A	I	211
SRR8326932	Intronic	MCP-ADAR2 DD (E488Q)-NLS - MS2 adRNA	G	25249			SRR8096307	CDS_nonsyn	BE3-R33A	I	107
SRR8326932	UTR3	MCP-ADAR2 DD (E488Q)-NLS - MS2 adRNA	G	19283			SRR8096307	CDS_syn	BE3-R33A	I	88
SRR8326932	CDS_syn	MCP-ADAR2 DD (E488Q)-NLS - MS2 adRNA	G	4366			SRR8096307	UTR5	BE3-R33A	I	8
SRR8326933	Intronic	MCP-ADAR2 DD (E488Q)-NLS + MS2 adRNA	G	0			SRR8096308	CDS_nonsyn	BE3-R33A/K34A	I	4
SRR8326933	UTR3	MCP-ADAR2 DD (E488Q)-NLS + MS2 adRNA	G	0			SRR8096308	UTR3	BE3-R33A/K34A	I	17
SRR8326933	UTR5	MCP-ADAR2 DD (E488Q)-NLS + MS2 adRNA	G	0			SRR8096308	CDS_syn	BE3-R33A/K34A	I	2
SRR8326933	Other	MCP-ADAR2 DD (E488Q)-NLS + MS2 adRNA	G	0			SRR8096308	Intronic	BE3-R33A/K34A	I	82
SRR8326933	CDS_syn	MCP-ADAR2 DD (E488Q)-NLS + MS2 adRNA	G	0			SRR8096308	UTR5	BE3-R33A/K34A	I	0
SRR8326933	CDS_nonsyn	MCP-ADAR2 DD (E488Q)-NLS + MS2 adRNA	G	0			SRR8096308	Other	BE3-R33A/K34A	I	90
SRR8326935	CDS_syn	293T+GFP	G	114			SRR8096310	Intronic	BE3	I	76425
SRR8326935	Other	293T+GFP	G	4860			SRR8096310	UTR3	BE3	I	461979
SRR8326935	Intronic	293T+GFP	G	8211			SRR8096310	CDS_nonsyn	BE3	I	169966
SRR8326935	CDS_nonsyn	293T+GFP	G	461			SRR8096310	Other	BE3	I	107703
SRR8326935	UTR5	293T+GFP	G	28			SRR8096310	CDS_syn	BE3	I	133198
SRR8326935	UTR3	293T+GFP	G	2529			SRR8096310	UTR5	BE3	I	11722
SRR8326936	Other	ADAR2 - GluR2 adRNA	G	58315			SRR8096311	UTR3	BE3-R33A	I	314
SRR8326936	Intronic	ADAR2 - GluR2 adRNA	G	109846			SRR8096311	Intronic	BE3-R33A	I	168
SRR8326936	CDS_nonsyn	ADAR2 - GluR2 adRNA	G	6046			SRR8096311	Other	BE3-R33A	I	196
SRR8326936	CDS_syn	ADAR2 - GluR2 adRNA	G	1739			SRR8096311	UTR5	BE3-R33A	I	11
SRR8326936	UTR5	ADAR2 - GluR2 adRNA	G	1349			SRR8096311	CDS_nonsyn	BE3-R33A	I	61
SRR8326936	UTR3	ADAR2 - GluR2 adRNA	G	30140			SRR8096311	CDS_syn	BE3-R33A	I	71
SRR8326937	UTR5	ADAR2 + GluR2 adRNA	G	406			SRR8096312	UTR5	BE3-R33A/K34A	I	0
SRR8326937	CDS_nonsyn	ADAR2 + GluR2 adRNA	G	1753			SRR8096312	CDS_syn	BE3-R33A/K34A	I	9
SRR8326937	CDS_syn	ADAR2 + GluR2 adRNA	G	548			SRR8096312	UTR3	BE3-R33A/K34A	I	12
SRR8326937	UTR3	ADAR2 + GluR2 adRNA	G	7635			SRR8096312	Intronic	BE3-R33A/K34A	I	52
SRR8326937	Intronic	ADAR2 + GluR2 adRNA	G	19627			SRR8096312	CDS_nonsyn	BE3-R33A/K34A	I	8
SRR8326937	Other	ADAR2 + GluR2 adRNA	G	12232			SRR8096312	Other	BE3-R33A/K34A	I	68
SRR8326938	Other	ADAR2 (E488Q) - Glu R2adRNA	G	151546			SRR8832240	CDS_syn	GFP	I	5
SRR8326938	CDS_nonsyn	ADAR2 (E488Q) - Glu R2adRNA	G	58936			SRR8832240	Intronic	GFP	I	105
SRR8326938	UTR3	ADAR2 (E488Q) - Glu R2adRNA	G	100592			SRR8832240	UTR5	GFP	I	0
SRR8326938	UTR5	ADAR2 (E488Q) - Glu R2adRNA	G	10279			SRR8832240	Other	GFP	I	99
SRR8326938	CDS_syn	ADAR2 (E488Q) - Glu R2adRNA	G	16048			SRR8832240	UTR3	GFP	I	16
SRR8326938	Intronic	ADAR2 (E488Q) - Glu R2adRNA	G	512816			SRR8832240	CDS_nonsyn	GFP	I	6
SRR8326939	UTR3	ADAR2 (E488Q) +GluR2 adRNA	G	102311
SRR8326939	Other	ADAR2 (E488Q) +GluR2 adRNA	G	99514
SRR8326939	CDS_syn	ADAR2 (E488Q) +GluR2 adRNA	G	19637
SRR8326939	UTR5	ADAR2 (E488Q) +GluR2 adRNA	G	9767
SRR8326939	CDS_nonsyn	ADAR2 (E488Q) +GluR2 adRNA	G	67713
SRR8326939	Intronic	ADAR2 (E488Q) +GluR2 adRNA	G	313833
SRR8326940	Other	Cas13b-ADAR2 DD (E488Q) - gRNA	G	37711
SRR8326940	CDS_syn	Cas13b-ADAR2 DD (E488Q) - gRNA	G	33035
SRR8326940	Intronic	Cas13b-ADAR2 DD (E488Q) - gRNA	G	43448
SRR8326940	UTR5	Cas13b-ADAR2 DD (E488Q) - gRNA	G	5953
SRR8326940	CDS_nonsyn	Cas13b-ADAR2 DD (E488Q) - gRNA	G	108286
SRR8326940	UTR3	Cas13b-ADAR2 DD (E488Q) - gRNA	G	137731
SRR8326941	UTR3	Cas13b-ADAR2 DD (E488Q) + gRNA	G	67888
SRR8326941	Intronic	Cas13b-ADAR2 DD (E488Q) + gRNA	G	23582
SRR8326941	UTR5	Cas13b-ADAR2 DD (E488Q) + gRNA	G	2796
SRR8326941	CDS_nonsyn	Cas13b-ADAR2 DD (E488Q) + gRNA	G	51518
SRR8326941	CDS_syn	Cas13b-ADAR2 DD (E488Q) + gRNA	G	14824
SRR8326941	Other	Cas13b-ADAR2 DD (E488Q) + gRNA	G	21861
SRR8326944	UTR3	GluR2 adRNA	G	54
SRR8326944	Intronic	GluR2 adRNA	G	126
SRR8326944	Other	GluR2 adRNA	G	108
SRR8326944	CDS_syn	GluR2 adRNA	G	0
SRR8326944	UTR5	GluR2 adRNA	G	0
SRR8326944	CDS_nonsyn	GluR2 adRNA	G	0
SRR8326945	UTR3	gRNA	G	81
SRR8326945	Other	gRNA	G	61
SRR8326945	CDS_syn	gRNA	G	3
SRR8326945	Intronic	gRNA	G	53
SRR8326945	UTR5	gRNA	G	0
SRR8326945	CDS_nonsyn	gRNA	G	4
SRR8326933	Other	MCP-ADAR2 DD (E488Q)-NLS + MS2 adRNA	G	21797
SRR8326933	Intronic	MCP-ADAR2 DD (E488Q)-NLS + MS2 adRNA	G	35159
SRR8326933	UTR3	MCP-ADAR2 DD (E488Q)-NLS + MS2 adRNA	G	32447
SRR8326933	UTR5	MCP-ADAR2 DD (E488Q)-NLS + MS2 adRNA	G	1207
SRR8326933	CDS_syn	MCP-ADAR2 DD (E488Q)-NLS + MS2 adRNA	G	7629
SRR8326933	CDS_nonsyn	MCP-ADAR2 DD (E488Q)-NLS + MS2 adRNA	G	27863
SRR8790738	Other	ABE7.10(F148A)-site 1	H	4844
SRR8790738	CDS_nonsyn	ABE7.10(F148A)-site 1	H	9
SRR8790738	UTR3	ABE7.10(F148A)-site 1	H	1656
SRR8790738	Intronic	ABE7.10(F148A)-site 1	H	6256
SRR8790738	UTR5	ABE7.10(F148A)-site 1	H	22
SRR8790738	CDS_syn	ABE7.10(F148A)-site 1	H	9
SRR8790739	UTR5	ABE7.10(F148A)-site 1	H	10
SRR8790739	CDS_nonsyn	ABE7.10(F148A)-site 1	H	14
SRR8790739	Intronic	ABE7.10(F148A)-site 1	H	5760
SRR8790739	Other	ABE7.10(F148A)-site 1	H	3675
SRR8790739	UTR3	ABE7.10(F148A)-site 1	H	1166
SRR8790739	CDS_syn	ABE7.10(F148A)-site 1	H	4
SRR8790742	Other	ABE7.10(D53E)-site 1	H	7538
SRR8790742	Intronic	ABE7.10(D53E)-site 1	H	10669
SRR8790742	CDS_nonsyn	ABE7.10(D53E)-site 1	H	139
SRR8790742	UTR3	ABE7.10(D53E)-site 1	H	2437
SRR8790742	CDS_syn	ABE7.10(D53E)-site 1	H	62
SRR8790742	UTR5	ABE7.10(D53E)-site 1	H	58
SRR8790743	CDS_nonsyn	ABE7.10(D53E)-site 1	H	122
SRR8790743	UTR5	ABE7.10(D53E)-site 1	H	33
SRR8790743	Other	ABE7.10(D53E)-site 1	H	6936
SRR8790743	UTR3	ABE7.10(D53E)-site 1	H	2283
SRR8790743	Intronic	ABE7.10(D53E)-site 1	H	9380
SRR8790743	CDS_syn	ABE7.10(D53E)-site 1	H	44
SRR8790744	CDS_nonsyn	ABE7.10(D53E)-site 1	H	86
SRR8790744	Other	ABE7.10(D53E)-site 1	H	3287
SRR8790744	Intronic	ABE7.10(D53E)-site 1	H	5043
SRR8790744	UTR5	ABE7.10(D53E)-site 1	H	10
SRR8790744	UTR3	ABE7.10(D53E)-site 1	H	1403
SRR8790744	CDS_syn	ABE7.10(D53E)-site 1	H	37
SRR8790745	UTR3	ABE7.10(F148A)-site 1	H	1167
SRR8790745	Intronic	ABE7.10(F148A)-site 1	H	3949
SRR8790745	Other	ABE7.10(F148A)-site 1	H	3206
SRR8790745	CDS_syn	ABE7.10(F148A)-site 1	H	28
SRR8790745	CDS_nonsyn	ABE7.10(F148A)-site 1	H	36
SRR8790745	UTR5	ABE7.10(F148A)-site 1	H	22
SRR8790750	CDS_syn	TadA-TadA	H	91
SRR8790750	UTR3	TadA-TadA	H	2852
SRR8790750	CDS_nonsyn	TadA-TadA	H	208
SRR8790750	UTR5	TadA-TadA	H	38
SRR8790750	Intronic	TadA-TadA	H	12545
SRR8790750	Other	TadA-TadA	H	7244
SRR8790751	UTR5	TadA-TadA	H	28
SRR8790751	Other	TadA-TadA	H	5184
SRR8790751	UTR3	TadA-TadA	H	2191
SRR8790751	CDS_syn	TadA-TadA	H	70
SRR8790751	CDS_nonsyn	TadA-TadA	H	215
SRR8790751	Intronic	TadA-TadA	H	10186
SRR8790753	CDS_nonsyn	TadA-TadA	H	129
SRR8790753	CDS_syn	TadA-TadA	H	47
SRR8790753	Other	TadA-TadA	H	5408
SRR8790753	Intronic	TadA-TadA	H	9990
SRR8790753	UTR5	TadA-TadA	H	9
SRR8790753	UTR3	TadA-TadA	H	2109
SRR8790756	UTR5	GFP	H	90
SRR8790756	Other	GFP	H	3736
SRR8790756	CDS_nonsyn	GFP	H	14
SRR8790756	UTR3	GFP	H	1337
SRR8790756	Intronic	GFP	H	5590
SRR8790756	CDS_syn	GFP	H	8
SRR8790757	UTR5	GFP	H	17
SRR8790757	Intronic	GFP	H	5356
SRR8790757	CDS_nonsyn	GFP	H	27
SRR8790757	CDS_syn	GFP	H	16
SRR8790757	UTR3	GFP	H	1350
SRR8790757	Other	GFP	H	4036
SRR8790762	Intronic	ABE7.10-site 1	H	5390
SRR8790762	CDS_syn	ABE7.10-site 1	H	102
SRR8790762	UTR5	ABE7.10-site 1	H	42
SRR8790762	Other	ABE7.10-site 1	H	4378
SRR8790762	CDS_nonsyn	ABE7.10-site 1	H	287
SRR8790762	UTR3	ABE7.10-site 1	H	2442
SRR8790763	CDS_syn	ABE7.10-site 1	H	82
SRR8790763	Other	ABE7.10-site 1	H	4046
SRR8790763	CDS_nonsyn	ABE7.10-site 1	H	205
SRR8790763	UTR3	ABE7.10-site 1	H	2668
SRR8790763	Intronic	ABE7.10-site 1	H	5488
SRR8790763	UTR5	ABE7.10-site 1	H	19
SRR8790764	Other	ABE7.10-site 1	H	3929
SRR8790764	UTR5	ABE7.10-site 1	H	33
SRR8790764	UTR3	ABE7.10-site 1	H	2237
SRR8790764	CDS_syn	ABE7.10-site 1	H	60
SRR8790764	CDS_nonsyn	ABE7.10-site 1	H	171
SRR8790764	Intronic	ABE7.10-site 1	H	6101
SRR8790765	UTR5	ABE7.10-site 2	H	19
SRR8790765	UTR3	ABE7.10-site 2	H	3580
SRR8790765	CDS_syn	ABE7.10-site 2	H	125
SRR8790765	CDS_nonsyn	ABE7.10-site 2	H	379
SRR8790765	Intronic	ABE7.10-site 2	H	7885
SRR8790765	Other	ABE7.10-site 2	H	5392
SRR8790766	CDS_nonsyn	ABE7.10-site 2	H	615
SRR8790766	CDS_syn	ABE7.10-site 2	H	219
SRR8790766	Other	ABE7.10-site 2	H	6903
SRR8790766	Intronic	ABE7.10-site 2	H	11508
SRR8790766	UTR5	ABE7.10-site 2	H	54
SRR8790766	UTR3	ABE7.10-site 2	H	4673
SRR8790767	CDS_syn	ABE7.10-site 2	H	147
SRR8790767	Other	ABE7.10-site 2	H	5440
SRR8790767	Intronic	ABE7.10-site 2	H	8905
SRR8790767	UTR5	ABE7.10-site 2	H	31
SRR8790767	CDS_nonsyn	ABE7.10-site 2	H	431
SRR8790767	UTR3	ABE7.10-site 2	H	4450
SRR8790772	UTR5	GFP	H	18
SRR8790772	Other	GFP	H	2963
SRR8790772	CDS_nonsyn	GFP	H	22
SRR8790772	CDS_syn	GFP	H	10
SRR8790772	UTR3	GFP	H	1035
SRR8790772	Intronic	GFP	H	5098
SRR8790773	UTR3	GFP	H	1088
SRR8790773	Other	GFP	H	2639
SRR8790773	Intronic	GFP	H	7292
SRR8790773	CDS_nonsyn	GFP	H	23
SRR8790773	CDS_syn	GFP	H	14
SRR8790773	UTR5	GFP	H	32
SRR8790774	Intronic	ABE7.10	H	8133
SRR8790774	UTR5	ABE7.10	H	22
SRR8790774	UTR3	ABE7.10	H	2827
SRR8790774	CDS_syn	ABE7.10	H	93
SRR8790774	CDS_nonsyn	ABE7.10	H	165
SRR8790774	Other	ABE7.10	H	5306
SRR8790775	Intronic	ABE7.10	H	8455
SRR8790775	CDS_syn	ABE7.10	H	108
SRR8790775	UTR5	ABE7.10	H	72
SRR8790775	CDS_nonsyn	ABE7.10	H	279
SRR8790775	UTR3	ABE7.10	H	2900
SRR8790775	Other	ABE7.10	H	5407
SRR8790776	UTR3	GFP	H	1422
SRR8790776	Intronic	GFP	H	8216
SRR8790776	UTR5	GFP	H	23
SRR8790776	Other	GFP	H	3405
SRR8790776	CDS_syn	GFP	H	11
SRR8790776	CDS_nonsyn	GFP	H	12
SRR8790777	Intronic	GFP	H	7330
SRR8790777	CDS_nonsyn	GFP	H	7
SRR8790777	UTR3	GFP	H	1534
SRR8790777	CDS_syn	GFP	H	17
SRR8790777	UTR5	GFP	H	15
SRR8790777	Other	GFP	H	3010
SRR8790780	Intronic	ABE7.10	H	10600
SRR8790780	UTR3	ABE7.10	H	3188
SRR8790780	CDS_syn	ABE7.10	H	129
SRR8790780	UTR5	ABE7.10	H	32
SRR8790780	Other	ABE7.10	H	5648
SRR8790780	CDS_nonsyn	ABE7.10	H	405
SRR9027783	UTR5	ABE7.10(F148A)-site 2	H	20
SRR9027783	UTR3	ABE7.10(F148A)-site 2	H	1788
SRR9027783	CDS_syn	ABE7.10(F148A)-site 2	H	7
SRR9027783	CDS_nonsyn	ABE7.10(F148A)-site 2	H	12
SRR9027783	Intronic	ABE7.10(F148A)-site 2	H	7522
SRR9027783	Other	ABE7.10(F148A)-site 2	H	6045
SRR9027787	UTR5	ABE7.10(F148A)-site 2	H	35
SRR9027787	Other	ABE7.10(F148A)-site 2	H	10442
SRR9027787	CDS_nonsyn	ABE7.10(F148A)-site 2	H	60
SRR9027787	UTR3	ABE7.10(F148A)-site 2	H	2269
SRR9027787	Intronic	ABE7.10(F148A)-site 2	H	11950
SRR9027787	CDS_syn	ABE7.10(F148A)-site 2	H	13
SRR9027788	UTR5	ABE7.10(F148A)-site 2	H	70
SRR9027788	Intronic	ABE7.10(F148A)-site 2	H	7602
SRR9027788	CDS_nonsyn	ABE7.10(F148A)-site 2	H	61
SRR9027788	CDS_syn	ABE7.10(F148A)-site 2	H	22
SRR9027788	UTR3	ABE7.10(F148A)-site 2	H	1599
SRR9027788	Other	ABE7.10(F148A)-site 2	H	6319

## Sheet: Supp. table 7
Table S7: Data presented in fig. S3		A-to-G index calculated over the whole genome, or over Alu elements, for all Adenine base-editor samples
A-to-G								C-to-T (genome wide)
Sample	Editor	Editing type	Index (genome wide)	Alu Index	Dataset			Sample	Editor	Editing type	Index (genome wide)	Dataset
SRR10523702	REPAIRv1(N81S)	A to G	0.180762	0.838149	A			SRR10523702	REPAIRv1(N81S)	C to T	0.042578	A
SRR10523709	REPAIRv1(N81S)	A to G	0.168513	0.822507	A			SRR10523709	REPAIRv1(N81S)	C to T	0.0418568	A
SRR10523720	REPAIRv1(N81S)	A to G	0.164003	0.777212	A			SRR10523720	REPAIRv1(N81S)	C to T	0.0425273	A
SRR10523731	REPAIRv1(N81S)	A to G	0.129771	0.854109	A			SRR10523731	REPAIRv1(N81S)	C to T	0.0417383	A
SRR10523740	REPAIRv1(N81S)	A to G	0.164884	0.797904	A			SRR10523740	REPAIRv1(N81S)	C to T	0.0414316	A
SRR10523749	REPAIRv1(N81S)	A to G	0.158827	0.774461	A			SRR10523749	REPAIRv1(N81S)	C to T	0.0418328	A
SRR10523753	REPAIRv1(N81S)	A to G	0.16721	0.814674	A			SRR10523753	REPAIRv1(N81S)	C to T	0.0429236	A
SRR10523762	REPAIRv1(N81S)	A to G	0.142831	0.792088	A			SRR10523762	REPAIRv1(N81S)	C to T	0.0417301	A
SRR10523766	REPAIRv1(N81S)	A to G	0.158387	0.767487	A			SRR10523766	REPAIRv1(N81S)	C to T	0.0414198	A
SRR10523710	REPAIRv1(X85W)	A to G	0.462416	1.13639	A			SRR10523710	REPAIRv1(X85W)	C to T	0.0419229	A
SRR10523712	REPAIRv1(X85W)	A to G	0.472649	1.18587	A			SRR10523712	REPAIRv1(X85W)	C to T	0.0424754	A
SRR10523723	REPAIRv1(X85W)	A to G	0.503131	1.21618	A			SRR10523723	REPAIRv1(X85W)	C to T	0.0424042	A
SRR10523734	REPAIRv1(X85W)	A to G	0.386296	1.16574	A			SRR10523734	REPAIRv1(X85W)	C to T	0.0418622	A
SRR10523742	REPAIRv1(X85W)	A to G	0.431391	1.10595	A			SRR10523742	REPAIRv1(X85W)	C to T	0.0427402	A
SRR10523756	REPAIRv1(X85W)	A to G	0.478933	1.16596	A			SRR10523756	REPAIRv1(X85W)	C to T	0.0427617	A
SRR10523703	REPAIRv2	A to G	0.0654348	0.711244	A			SRR10523703	REPAIRv2	C to T	0.0419633	A
SRR10523711	REPAIRv2	A to G	0.0652742	0.67806	A			SRR10523711	REPAIRv2	C to T	0.0418562	A
SRR10523722	REPAIRv2	A to G	0.0637384	0.673645	A			SRR10523722	REPAIRv2	C to T	0.0416848	A
SRR10523733	REPAIRv2	A to G	0.0608747	0.755594	A			SRR10523733	REPAIRv2	C to T	0.0411389	A
SRR10523741	REPAIRv2	A to G	0.0647983	0.673916	A			SRR10523741	REPAIRv2	C to T	0.0415495	A
SRR10523755	REPAIRv2	A to G	0.0657298	0.692843	A			SRR10523755	REPAIRv2	C to T	0.0418519	A
SRR10523704	RESCUE	A to G	0.38748	0.988841	A			SRR10523704	RESCUE	C to T	0.0813528	A
SRR10523713	RESCUE	A to G	0.377712	0.954757	A			SRR10523713	RESCUE	C to T	0.0804122	A
SRR10523715	RESCUE	A to G	0.383807	0.993897	A			SRR10523715	RESCUE	C to T	0.0814837	A
SRR10523721	RESCUE	A to G	0.391812	0.955756	A			SRR10523721	RESCUE	C to T	0.0829957	A
SRR10523724	RESCUE	A to G	0.394239	1.00661	A			SRR10523724	RESCUE	C to T	0.0825117	A
SRR10523726	RESCUE	A to G	0.323339	0.982289	A			SRR10523726	RESCUE	C to T	0.0754244	A
SRR10523735	RESCUE	A to G	0.368893	1.00502	A			SRR10523735	RESCUE	C to T	0.0792657	A
SRR10523744	RESCUE	A to G	0.40642	0.990267	A			SRR10523744	RESCUE	C to T	0.084099	A
SRR10523757	RESCUE	A to G	0.387424	1.02012	A			SRR10523757	RESCUE	C to T	0.081229	A
SRR10523705	RESCUE+N473I	A to G	0.212717	0.780911	A			SRR10523705	RESCUE+N473I	C to T	0.0531957	A
SRR10523714	RESCUE+N473I	A to G	0.223397	0.779287	A			SRR10523714	RESCUE+N473I	C to T	0.0555125	A
SRR10523716	RESCUE+N473I	A to G	0.213113	0.765298	A			SRR10523716	RESCUE+N473I	C to T	0.0545809	A
SRR10523725	RESCUE+N473I	A to G	0.224587	0.772769	A			SRR10523725	RESCUE+N473I	C to T	0.0550934	A
SRR10523727	RESCUE+N473I	A to G	0.184052	0.826868	A			SRR10523727	RESCUE+N473I	C to T	0.0531873	A
SRR10523732	RESCUE+N473I	A to G	0.233976	0.790116	A			SRR10523732	RESCUE+N473I	C to T	0.055995	A
SRR10523736	RESCUE+N473I	A to G	0.185293	0.819167	A			SRR10523736	RESCUE+N473I	C to T	0.0523773	A
SRR10523745	RESCUE+N473I	A to G	0.235078	0.768679	A			SRR10523745	RESCUE+N473I	C to T	0.0577687	A
SRR10523758	RESCUE+N473I	A to G	0.210956	0.828489	A			SRR10523758	RESCUE+N473I	C to T	0.0552186	A
SRR10523706	RESCUE+S375A	A to G	0.0844351	0.680745	A			SRR10523706	RESCUE+S375A	C to T	0.0550361	A
SRR10523717	RESCUE+S375A	A to G	0.087429	0.679872	A			SRR10523717	RESCUE+S375A	C to T	0.0553093	A
SRR10523737	RESCUE+S375A	A to G	0.0925069	0.660092	A			SRR10523737	RESCUE+S375A	C to T	0.0555771	A
SRR10523743	RESCUE+S375A	A to G	0.0871077	0.681624	A			SRR10523743	RESCUE+S375A	C to T	0.0549832	A
SRR10523746	RESCUE+S375A	A to G	0.0855971	0.682233	A			SRR10523746	RESCUE+S375A	C to T	0.0571185	A
SRR10523750	RESCUE+S375A	A to G	0.0866808	0.658468	A			SRR10523750	RESCUE+S375A	C to T	0.0544369	A
SRR10523759	RESCUE+S375A	A to G	0.0849165	0.725825	A			SRR10523759	RESCUE+S375A	C to T	0.0569853	A
SRR10523763	RESCUE+S375A	A to G	0.0963461	0.663917	A			SRR10523763	RESCUE+S375A	C to T	0.0580374	A
SRR10523707	RESCUE+S375C	A to G	0.123926	0.730829	A			SRR10523707	RESCUE+S375C	C to T	0.0585748	A
SRR10523718	RESCUE+S375C	A to G	0.127216	0.704917	A			SRR10523718	RESCUE+S375C	C to T	0.0586315	A
SRR10523729	RESCUE+S375C	A to G	0.111138	0.755604	A			SRR10523729	RESCUE+S375C	C to T	0.0560834	A
SRR10523738	RESCUE+S375C	A to G	0.122446	0.718349	A			SRR10523738	RESCUE+S375C	C to T	0.0573377	A
SRR10523747	RESCUE+S375C	A to G	0.128374	0.716775	A			SRR10523747	RESCUE+S375C	C to T	0.0588443	A
SRR10523751	RESCUE+S375C	A to G	0.125149	0.745562	A			SRR10523751	RESCUE+S375C	C to T	0.0583108	A
SRR10523754	RESCUE+S375C	A to G	0.13207	0.744704	A			SRR10523754	RESCUE+S375C	C to T	0.0587349	A
SRR10523760	RESCUE+S375C	A to G	0.126783	0.756657	A			SRR10523760	RESCUE+S375C	C to T	0.0589795	A
SRR10523764	RESCUE+S375C	A to G	0.127422	0.706848	A			SRR10523764	RESCUE+S375C	C to T	0.0578052	A
SRR10523701	RESCUE+S375N	A to G	0.251768	0.840803	A			SRR10523701	RESCUE+S375N	C to T	0.0612558	A
SRR10523708	RESCUE+S375N	A to G	0.238877	0.802076	A			SRR10523708	RESCUE+S375N	C to T	0.0596664	A
SRR10523719	RESCUE+S375N	A to G	0.246227	0.841928	A			SRR10523719	RESCUE+S375N	C to T	0.060858	A
SRR10523730	RESCUE+S375N	A to G	0.213956	0.846889	A			SRR10523730	RESCUE+S375N	C to T	0.0568102	A
SRR10523739	RESCUE+S375N	A to G	0.22943	0.831004	A			SRR10523739	RESCUE+S375N	C to T	0.0592772	A
SRR10523748	RESCUE+S375N	A to G	0.252695	0.792323	A			SRR10523748	RESCUE+S375N	C to T	0.0610346	A
SRR10523752	RESCUE+S375N	A to G	0.23081	0.842022	A			SRR10523752	RESCUE+S375N	C to T	0.0594398	A
SRR10523761	RESCUE+S375N	A to G	0.230401	0.857888	A			SRR10523761	RESCUE+S375N	C to T	0.0597475	A
SRR10523765	RESCUE+S375N	A to G	0.245694	0.844951	A			SRR10523765	RESCUE+S375N	C to T	0.0597588	A
SRR6686539	2BoxB-4LN-DD	A to G	0.239926	2.49954	B			SRR8910094	eA3A-BE3	C to T	0.0498207	D
SRR6686537	2BoxB-4LN-DD E488Q	A to G	0.502986	3.10713	B			SRR8910102	eA3A-BE3	C to T	0.0577698	D
SRR6686542	2BoxB-4LN-DD E488Q NLS	A to G	0.297326	2.49413	B			SRR8910092	GFP	C to T	0.0487221	D
SRR6686536	2BoxB-4LN-DD NLS	A to G	0.133665	2.23203	B			SRR8910096	GFP	C to T	0.0508159	D
SRR6686543	2BoxB-No enzyme	A to G	0.0386733	1.23304	B			SRR8910093	hA3A-BE3	C to T	0.432256	D
SRR6686541	No guide-4LN-DD E488Q NLS	A to G	0.150057	2.26203	B			SRR8910097	hA3A-BE3	C to T	0.419275	D
SRR6686540	No guide-4LN-DD NLS	A to G	0.0384254	1.22271	B			SRR8910101	hA3A-BE3	C to T	0.459388	D
SRR6686538	No guide-No enzyme	A to G	0.045979	1.24056	B			SRR8910095	hAID-BE3	C to T	0.0493044	D
SRR8979748	Cas9D10A	A to G	0.230786	1.39024	C			SRR8910099	hAID-BE3	C to T	0.0514777	D
SRR8979749	ABEmax(TadAE59A,Tad*E59A)	A to G	0.252323	2.34774	C			SRR8910103	hAID-BE3	C to T	0.063402	D
SRR8979750	ABEmax(TadAE59A)	A to G	0.29667	1.6435	C			SRR11561281	BE4-AmAPOBEC1	C to T	0.0485766	E
SRR8979751	ABEmax	A to G	0.342334	1.63875	C			SRR11561282	BE4-AmAPOBEC1	C to T	0.0475417	E
SRR8979752	ABEmax(TadAE59A,Tad*E59A)	A to G	0.243078	1.55443	C			SRR11561283	BE4-AmAPOBEC1	C to T	0.0469531	E
SRR8979753	ABEmax(TadAE59A)	A to G	0.356753	1.57958	C			SRR11561284	BE4-AmAPOBEC1	C to T	0.0484603	E
SRR8979754	ABEmax	A to G	0.345103	1.57466	C			SRR11561285	BE4-AmAPOBEC1	C to T	0.0467499	E
SRR8979755	ABEmaxAW	A to G	0.250755	1.76104	C			SRR11561286	BE4-AmAPOBEC1	C to T	0.0465416	E
SRR8979756	ABEmaxAW	A to G	0.251012	1.51952	C			SRR11561310	BE4-PpAPOBEC1	C to T	0.0566206	E
SRR8979757	Cas9D10A	A to G	0.237002	1.41678	C			SRR11561311	BE4-PpAPOBEC1	C to T	0.0564761	E
SRR8979758	ABEmax(TadAE59A)	A to G	0.334366	1.97096	C			SRR11561312	BE4-PpAPOBEC1	C to T	0.0569025	E
SRR8979759	ABEmax	A to G	0.376415	1.98353	C			SRR11561313	BE4-PpAPOBEC1	C to T	0.0568455	E
SRR8979760	Cas9D10A	A to G	0.237462	1.78066	C			SRR11561315	BE4-PpAPOBEC1	C to T	0.0565811	E
SRR8979761	ABEmax(TadAE59A,Tad*E59A)	A to G	0.251601	2.02795	C			SRR11561316	BE4-PpAPOBEC1	C to T	0.0567326	E
SRR8979762	ABEmaxAW	A to G	0.26312	1.84242	C			SRR11561294	BE4-PpAPOBEC1-H122A	C to T	0.0572207	E
SRR8908975	ABEmax	A to G	0.3068	1.624	D			SRR11561295	BE4-PpAPOBEC1-H122A	C to T	0.056894	E
SRR8908980	ABEmax	A to G	0.440048	1.63973	D			SRR11561296	BE4-PpAPOBEC1-H122A	C to T	0.0511096	E
SRR8908985	ABEmax	A to G	0.391825	1.63725	D			SRR11561300	BE4-PpAPOBEC1-H122A	C to T	0.04889	E
SRR8908990	ABEmax	A to G	0.294082	1.61016	D			SRR11561301	BE4-PpAPOBEC1-H122A	C to T	0.0555315	E
SRR8908995	ABEmax	A to G	0.408002	1.70453	D			SRR11561302	BE4-PpAPOBEC1-H122A	C to T	0.0566317	E
SRR8909000	ABEmax	A to G	0.450726	1.69881	D			SRR11561304	BE4-PpAPOBEC1-R33A	C to T	0.0450388	E
SRR8909005	ABEmax	A to G	0.428809	1.70268	D			SRR11561305	BE4-PpAPOBEC1-R33A	C to T	0.0449172	E
SRR8909011	ABEmax	A to G	0.420883	1.69686	D			SRR11561306	BE4-PpAPOBEC1-R33A	C to T	0.0444468	E
SRR8909017	ABEmax	A to G	0.415145	1.68236	D			SRR11561307	BE4-PpAPOBEC1-R33A	C to T	0.0443768	E
SRR8909009	GFP	A to G	0.0542442	1.19814	D			SRR11561308	BE4-PpAPOBEC1-R33A	C to T	0.0454791	E
SRR8909015	GFP	A to G	0.0592899	1.41543	D			SRR11561309	BE4-PpAPOBEC1-R33A	C to T	0.0454205	E
SRR8908977	K20A/R21A	A to G	0.0931586	1.40457	D			SRR11561297	BE4-rAPOBEC1	C to T	0.422948	E
SRR8908982	K20A/R21A	A to G	0.151819	1.47933	D			SRR11561298	BE4-rAPOBEC1	C to T	0.423106	E
SRR8908987	K20A/R21A	A to G	0.158602	1.46788	D			SRR11561299	BE4-rAPOBEC1	C to T	0.41786	E
SRR8908992	K20A/R21A	A to G	0.115801	1.51462	D			SRR11561323	BE4-rAPOBEC1	C to T	0.432739	E
SRR8908997	K20A/R21A	A to G	0.153903	1.66995	D			SRR11561324	BE4-rAPOBEC1	C to T	0.432602	E
SRR8909002	K20A/R21A	A to G	0.16301	1.69793	D			SRR11561317	BE4-rAPOBEC1-K34A-H122A	C to T	0.0431719	E
SRR8909007	K20A/R21A	A to G	0.136422	1.46249	D			SRR11561318	BE4-rAPOBEC1-K34A-H122A	C to T	0.0447248	E
SRR8909013	K20A/R21A	A to G	0.140506	1.52978	D			SRR11561319	BE4-rAPOBEC1-K34A-H122A	C to T	0.0484273	E
SRR8909019	K20A/R21A	A to G	0.141888	1.41512	D			SRR11561321	BE4-rAPOBEC1-K34A-H122A	C to T	0.047749	E
SRR8908976	miniABEmax	A to G	0.280735	1.54683	D			SRR11561322	BE4-rAPOBEC1-K34A-H122A	C to T	0.0492038	E
SRR8908981	miniABEmax	A to G	0.488309	1.57709	D			SRR11561287	BE4-RrA3F	C to T	0.0424803	E
SRR8908986	miniABEmax	A to G	0.469952	1.6522	D			SRR11561288	BE4-RrA3F	C to T	0.0429816	E
SRR8908991	miniABEmax	A to G	0.310372	1.61384	D			SRR11561290	BE4-RrA3F	C to T	0.0429701	E
SRR8908996	miniABEmax	A to G	0.4778	1.72291	D			SRR11561291	BE4-RrA3F	C to T	0.0427219	E
SRR8909001	miniABEmax	A to G	0.52656	1.70977	D			SRR11561292	BE4-RrA3F	C to T	0.0419496	E
SRR8909006	miniABEmax	A to G	0.462175	1.56172	D			SRR11561293	BE4-RrA3F	C to T	0.0433448	E
SRR8909012	miniABEmax	A to G	0.37216	1.59559	D			SRR11561274	BE4-SsAPOBEC3B	C to T	0.0467965	E
SRR8909018	miniABEmax	A to G	0.409891	1.54757	D			SRR11561276	BE4-SsAPOBEC3B	C to T	0.0433306	E
SRR8908978	V82G	A to G	0.0906758	1.37712	D			SRR11561277	BE4-SsAPOBEC3B	C to T	0.0430951	E
SRR8908983	V82G	A to G	0.126531	1.45134	D			SRR11561279	BE4-SsAPOBEC3B	C to T	0.0446076	E
SRR8908988	V82G	A to G	0.122562	1.49717	D			SRR11561280	BE4-SsAPOBEC3B	C to T	0.0455748	E
SRR8908993	V82G	A to G	0.0969141	1.39807	D			SRR11561289	nCas9	C to T	0.0434884	E
SRR8908998	V82G	A to G	0.114732	1.59831	D			SRR11561303	nCas9	C to T	0.0415266	E
SRR8909003	V82G	A to G	0.122308	1.69797	D			SRR11561314	nCas9	C to T	0.0411633	E
SRR8909008	V82G	A to G	0.105125	1.46349	D			SRR11561325	nCas9	C to T	0.0434896	E
SRR8909014	V82G	A to G	0.106675	1.46289	D			SRR11561326	nCas9	C to T	0.0435615	E
SRR8909020	V82G	A to G	0.110133	1.37377	D			SRR8790752	APOBEC1	C to T	0.369148	H
SRR6951146	ctrl	A to G	0.0366445	0.953276	F			SRR8790754	APOBEC1	C to T	0.373158	H
SRR6951147	ctrl	A to G	0.0403128	0.940025	F			SRR8790755	APOBEC1	C to T	0.387106	H
SRR6951148	SA1+gRNA	A to G	0.0429022	0.997975	F			SRR8790778	BE3	C to T	0.199663	H
SRR6951149	SA1+gRNA	A to G	0.0429993	0.948171	F			SRR8790779	BE3	C to T	0.200301	H
SRR6951152	SA1Q	A to G	0.0604156	1.06398	F			SRR8790781	BE3	C to T	0.284882	H
SRR6951153	SA1Q	A to G	0.0649852	1.08121	F			SRR8790768	BE3(hA3A)-site 3	C to T	0.06379	H
SRR6951156	SA1Q+gRNA	A to G	0.0660411	1.09973	F			SRR8790769	BE3(hA3A)-site 3	C to T	0.0600906	H
SRR6951157	SA1Q+gRNA	A to G	0.064045	1.07537	F			SRR8790770	BE3(hA3A)-site 3	C to T	0.0677774	H
SRR6951150	SA2+gRNA	A to G	0.0435068	0.997209	F			SRR9027793	BE3(hA3AR128A)-site 3	C to T	0.0383645	H
SRR6951151	SA2+gRNA	A to G	0.0429173	0.969252	F			SRR9027794	BE3(hA3AR128A)-site 3	C to T	0.0402877	H
SRR6951154	SA2Q	A to G	0.0708605	1.35286	F			SRR9027807	BE3(hA3AY130F)-site 3	C to T	0.0319932	H
SRR6951155	SA2Q	A to G	0.068528	1.3362	F			SRR9027808	BE3(hA3AY130F)-site 3	C to T	0.0313474	H
SRR6951158	SA2Q+gRNA	A to G	0.0696098	1.32874	F			SRR9027810	BE3(hA3AY130F)-site 3	C to T	0.0310979	H
SRR6951159	SA2Q+gRNA	A to G	0.0717653	1.3688	F			SRR8790748	BE3(W90A)-site 3	C to T	0.0283723	H
SRR8326916	293T	A to G	0.0620484	1.18279	G			SRR8790749	BE3(W90A)-site 3	C to T	0.0268194	H
SRR8326936	ADAR2 - GluR2 adRNA	A to G	0.16958	5.54829	G			SRR8790771	BE3(W90A)-site 3	C to T	0.0284166	H
SRR8326939	ADAR2 (E488Q) +GluR2 adRNA	A to G	1.65525	8.1836	G			SRR9027800	BE3(W90Y/R126E)-site 3	C to T	0.0521573	H
SRR8326937	ADAR2 + GluR2 adRNA	A to G	0.345947	5.80147	G			SRR9027801	BE3(W90Y/R126E)-site 3	C to T	0.0563263	H
SRR8326940	Cas13b-ADAR2 DD (E488Q) - gRNA	A to G	0.579202	2.43401	G			SRR8790759	BE3-RNF2	C to T	0.116445	H
SRR8326941	Cas13b-ADAR2 DD (E488Q) + gRNA	A to G	0.324888	2.16216	G			SRR8790760	BE3-RNF2	C to T	0.0988259	H
SRR8326944	GluR2 adRNA	A to G	0.0578341	1.63565	G			SRR8790761	BE3-RNF2	C to T	0.115896	H
SRR8326945	gRNA	A to G	0.0549253	1.51572	G			SRR8790747	BE3-site 3	C to T	0.0927838	H
SRR8326922	MCP-ADAR1 DD (E1008Q)-NES - MS2 adRNA	A to G	1.1007	3.07891	G			SRR8790758	BE3-site 3	C to T	0.0985469	H
SRR8326923	MCP-ADAR1 DD (E1008Q)-NES + MS2 adRNA	A to G	0.985876	2.72089	G			SRR8790757	GFP	C to T	0.0295971	H
SRR8326924	MCP-ADAR1 DD (E1008Q)-NLS - MS2 adRNA	A to G	0.532679	2.44191	G			SRR8790772	GFP	C to T	0.0293635	H
SRR8326925	MCP-ADAR1 DD (E1008Q)-NLS +MS2 adRNA	A to G	0.626875	2.64205	G			SRR8790773	GFP	C to T	0.028749	H
SRR8326918	MCP-ADAR1 DD-NES - MS2 adRNA	A to G	0.636156	2.50031	G			SRR8790776	GFP	C to T	0.0297943	H
SRR8326919	MCP-ADAR1 DD-NES + MS2 adRNA	A to G	0.584985	2.38538	G			SRR8790777	GFP	C to T	0.0327484	H
SRR8326920	MCP-ADAR1 DD-NLS - MS2 adRNA	A to G	0.227142	1.92378	G			SRR8096262	BE3	C to T	1.66856	I
SRR8326921	MCP-ADAR1 DD-NLS + MS2 adRNA	A to G	0.263871	2.08327	G			SRR8096302	BE3	C to T	1.61536	I
SRR8326928	MCP-ADAR2 DD (E488Q)-NES - MS2 adRNA	A to G	0.25935	2.15391	G			SRR8096306	BE3	C to T	1.9135	I
SRR8326929	MCP-ADAR2 DD (E488Q)-NES + MS2 adRNA	A to G	0.296391	2.17534	G			SRR8096310	BE3	C to T	1.76905	I
SRR8326932	MCP-ADAR2 DD (E488Q)-NLS - MS2 adRNA	A to G	0.223489	2.17285	G			SRR8096263	BE3-E63Q	C to T	0.0762053	I
SRR8326933	MCP-ADAR2 DD (E488Q)-NLS + MS2 adRNA	A to G	0.275796	2.36833	G			SRR8096298	BE3-E63Q	C to T	0.0553465	I
SRR8326926	MCP-ADAR2 DD-NES - MS2 adRNA	A to G	0.13861	1.79215	G			SRR8096300	BE3-E63Q	C to T	0.0470396	I
SRR8326927	MCP-ADAR2 DD-NES + MS2 adRNA	A to G	0.183516	2.02966	G			SRR8096267	BE3-R33A	C to T	0.14611	I
SRR8326930	MCP-ADAR2 DD-NLS - MS2 adRNA	A to G	0.120067	1.62798	G			SRR8096303	BE3-R33A	C to T	0.109011	I
SRR8326931	MCP-ADAR2 DD-NLS + MS2 adRNA	A to G	0.113984	1.68768	G			SRR8096307	BE3-R33A	C to T	0.111842	I
SRR8790774	ABE7.10	A to G	0.133624	1.65145	H			SRR8096311	BE3-R33A	C to T	0.107241	I
SRR8790775	ABE7.10	A to G	0.130944	1.5883	H			SRR8096269	BE3-R33A/K34A	C to T	0.0894601	I
SRR8790780	ABE7.10	A to G	0.154664	1.78077	H			SRR8096304	BE3-R33A/K34A	C to T	0.0585023	I
SRR8790742	ABE7.10(D53E)-site 1	A to G	0.129501	1.4994	H			SRR8096308	BE3-R33A/K34A	C to T	0.0541044	I
SRR8790743	ABE7.10(D53E)-site 1	A to G	0.131431	1.57273	H			SRR8096312	BE3-R33A/K34A	C to T	0.0550572	I
SRR8790744	ABE7.10(D53E)-site 1	A to G	0.110674	1.33233	H			SRR8832240	GFP	C to T	0.050639	I
SRR8790738	ABE7.10(F148A)-site 1	A to G	0.0540188	1.26645	H
SRR8790739	ABE7.10(F148A)-site 1	A to G	0.0540237	1.2865	H
SRR8790745	ABE7.10(F148A)-site 1	A to G	0.0497969	1.16095	H
SRR9027783	ABE7.10(F148A)-site 2	A to G	0.0735844	1.90062	H
SRR9027787	ABE7.10(F148A)-site 2	A to G	0.0779858	2.09135	H
SRR9027788	ABE7.10(F148A)-site 2	A to G	0.0739784	1.9314	H
SRR8790762	ABE7.10-site 1	A to G	0.132915	1.30673	H
SRR8790763	ABE7.10-site 1	A to G	0.130328	1.28349	H
SRR8790764	ABE7.10-site 1	A to G	0.130338	1.25992	H
SRR8790765	ABE7.10-site 2	A to G	0.172314	1.5672	H
SRR8790766	ABE7.10-site 2	A to G	0.171702	1.6257	H
SRR8790767	ABE7.10-site 2	A to G	0.169404	1.54927	H
SRR8790757	GFP	A to G	0.0424633	1.2488	H
SRR8790772	GFP	A to G	0.0428462	1.29176	H
SRR8790773	GFP	A to G	0.0486976	1.45925	H
SRR8790776	GFP	A to G	0.0498597	1.45885	H
SRR8790777	GFP	A to G	0.0497144	1.40148	H
SRR8790750	TadA-TadA*	A to G	0.230856	1.68287	H
SRR8790751	TadA-TadA*	A to G	0.232941	1.64239	H
SRR8790753	TadA-TadA*	A to G	0.215966	1.70269	H

## Sheet: Supp. table 8
Table S8: p-values all tests presented in fig. S3				Statistical comparison of genome-wide, or Alu, index values between base-editor samples and controls.
P-value, t-statistic (t), degrees of freedom (df) and confidance intervals (CI) were calculated using R "t.test" function (two-sided unpaired t-test), comparing log(index).
Accordingly, the confidence interval and the effect size shown are for the difference in mean(log(index)) between sample and control. Hedges' g effect size was calculated using R.
A-to-G (Genome wide)											A-to-G (Alu)											C-to-T (Genome wide)
Name	Number of samples	p-value	t	df	CI lower	CI upper	Effect size	Dataset			Name	Number of samples	p-value	t	df	CI lower	CI upper	Effect size	Dataset			Name	Number of samples	p-value	t	df	CI lower	CI upper	Effect size	Dataset
RESCUE	9							A			RESCUE	9							A			RESCUE	9							A
RESCUE+S375N	9							A			RESCUE+S375N	9							A			RESCUE+S375N	9							A
RESCUE+S375C	9							A			RESCUE+S375C	9							A			RESCUE+S375C	9							A
RESCUE+S375A	9							A			RESCUE+S375A	9							A			RESCUE+S375A	8							A
RESCUE+N473I	9							A			RESCUE+N473I	9							A			RESCUE+N473I	9							A
REPAIRv1(X85W)	6							A			REPAIRv1(X85W)	6							A			REPAIRv1(X85W)	6							A
REPAIRv2	6							A			REPAIRv2	6							A			REPAIRv2	6							A
REPAIRv1(N81S)	9							A			REPAIRv1(N81S)	9							A			REPAIRv1(N81S)	9							A
2BoxB-4LN-DD	1							B			2BoxB-4LN-DD	1							B			GFP	2							D
2BoxB-4LN-DD NLS	1							B			2BoxB-4LN-DD NLS	1							B			hA3A-BE3	3	9.39738e-06	63.6632	2.97052	0.895858	0.990696	42.2664	D
2BoxB-4LN-DD E488Q	1							B			2BoxB-4LN-DD E488Q	1							B			eA3A-BE3	2	0.488258	0.978269	1.16054	-0.275446	0.340831	0.559011	D
2BoxB-4LN-DD E488Q NLS	1							B			2BoxB-4LN-DD E488Q NLS	1							B			hAID-BE3	3	0.371337	1.10697	2.2799	-0.0952742	0.17262	0.734921	D
2BoxB-No enzyme	1							B			2BoxB-No enzyme	1							B			nCas9	5							E
No guide-4LN-DD NLS	1							B			No guide-4LN-DD NLS	1							B			BE4-rAPOBEC1	5	1.8862e-12	160.17	6.20027	0.984326	1.01463	91.4973	E
No guide-4LN-DD E488Q NLS	1							B			No guide-4LN-DD E488Q NLS	1							B			BE4-rAPOBEC1-K34A-H122A	5	0.0197335	3.17083	5.90249	0.00869767	0.0685444	1.81134	E
No guide-No enzyme	1							B			No guide-No enzyme	1							B			BE4-PpAPOBEC1	6	1.99851e-05	22.5183	4.06979	0.108629	0.138949	12.4667	E
Cas9D10A	3							C			Cas9D10A	3							C			BE4-PpAPOBEC1-R33A	6	0.0110195	3.97118	4.90945	0.00800698	0.0378673	2.19856	E
ABEmax	3	0.00301544	12.9236	2.36372	0.126795	0.229545	8.44163	C			ABEmax	3	0.304083	1.18008	3.95233	-0.0746396	0.184083	0.770827	C			BE4-PpAPOBEC1-H122A	6	8.36902e-05	8.10709	7.00048	0.0743162	0.135519	4.48831	E
ABEmax(TadAE59A)	3	0.0225526	6.09749	2.11594	0.0479046	0.242301	3.98287	C			ABEmax(TadAE59A)	3	0.297128	1.20191	3.90807	-0.0728011	0.182144	0.785087	C			BE4-RrA3F	6	0.859516	0.186174	5.07967	-0.0138342	0.0160056	0.103071	E
ABEmax(TadAE59A,Tad*E59A)	3	0.0214904	3.80113	3.74834	0.00623385	0.0436727	2.48289	C			ABEmax(TadAE59A,Tad*E59A)	3	0.171185	1.72211	3.46159	-0.0774134	0.293618	1.12488	C			BE4-AmAPOBEC1	6	0.00020103	7.31105	6.68688	0.031399	0.0618462	4.0476	E
ABEmaxAW	3	0.0187436	4.41452	3.207	0.0107202	0.059641	2.88355	C			ABEmaxAW	3	0.318954	1.15186	3.66386	-0.0739534	0.172547	0.752394	C			BE4-SsAPOBEC3B	5	0.0495181	2.32874	7.68741	5.46665e-05	0.0402941	1.33029	E
GFP	2							D			GFP	2							D			GFP	5							H
ABEmax	9	2.92299e-06	28.2744	4.52035	0.759931	0.917427	20.2086	D			ABEmax	9	0.20521	2.94279	1.01678	-0.337188	0.551077	2.1033	D			APOBEC1	3	1.12401e-10	94.5089	5.94653	1.06974	1.12674	60.017	H
miniABEmax	9	5.51471e-08	23.3471	7.11226	0.775855	0.950106	16.6868	D			miniABEmax	9	0.22881	2.53376	1.05445	-0.319876	0.505721	1.81095	D			BE3	3	0.00257416	16.7731	2.14767	0.664563	1.08506	10.6516	H
K20A/R21A	9	3.60825e-05	11.9429	5.55104	0.304596	0.465528	8.53593	D			K20A/R21A	9	0.307899	1.73645	1.14735	-0.28823	0.41833	1.2411	D			BE3-RNF2	3	0.000371426	22.2301	2.72045	0.478598	0.649974	14.117	H
V82G	9	0.00216676	11.4054	2.74266	0.203064	0.372549	8.15178	D			V82G	9	0.358815	1.45226	1.16336	-0.290389	0.399577	1.03798	D			BE3-site 3	2	0.000519022	30.7762	2.25902	0.440004	0.566309	21.6836	H
ctrl	2							G			ctrl	2							F			BE3(W90Y/R126E)-site 3	2	0.00915889	13.2535	1.75564	0.161145	0.35208	9.33783	H
SA1+gRNA	2	0.258058	2.32809	1.00112	-0.214367	0.310855	1.33034	G			SA1+gRNA	2	0.473642	1.02597	1.1487	-0.0966064	0.120254	0.586271	F			BE3(W90A)-site 3	3	0.0458825	-2.52958	5.82302	-0.0640309	-0.000827286	-1.60639	H
SA2+gRNA	2	0.240535	2.4307	1.04087	-0.191592	0.29333	1.38897	G			SA2+gRNA	2	0.184621	2.38758	1.45777	-0.0266988	0.059563	1.36433	F			BE3(hA3A)-site 3	3	9.12464e-05	18.1986	3.71264	0.275956	0.379005	11.5568	H
SA1Q	2	0.0178798	8.14042	1.87101	0.092319	0.332192	4.65167	G			SA1Q	2	0.00769382	11.7248	1.96335	0.0339767	0.0745081	6.69988	F			BE3(hA3AR128A)-site 3	2	0.00442879	8.10567	2.90184	0.0702618	0.164038	5.7109	H
SA2Q	2	0.0316327	11.7701	1.24248	0.0802499	0.43657	6.72575	G			SA2Q	2	0.000772871	37.5374	1.971	0.134669	0.170099	21.4499	F			BE3(hA3AY130F)-site 3	3	0.10616	1.96797	5.00348	-0.00630104	0.0474927	1.24974	H
SA1Q+gRNA	2	0.0393327	10.4962	1.20478	0.0415966	0.415251	5.99782	G			SA1Q+gRNA	2	0.0158064	10.5032	1.67767	0.0304145	0.0900733	6.00181	F			GFP	1							I
SA2Q+gRNA	2	0.033152	12.1642	1.20222	0.0771092	0.452023	6.951	G			SA2Q+gRNA	2	0.00919503	21.5602	1.42342	0.107429	0.199991	12.3201	F			BE3	4							I
293T	1							G			293T	1							G			BE3-R33A	4							I
293T+GFP	1							G			293T+GFP	1							G			BE3-R33A/K34A	4							I
gRNA	1							G			gRNA	1							G			BE3-E63Q	3							I
Cas13b-ADAR2 DD (E488Q) - gRNA	1							G			Cas13b-ADAR2 DD (E488Q) - gRNA	1							G
Cas13b-ADAR2 DD (E488Q) + gRNA	1							G			Cas13b-ADAR2 DD (E488Q) + gRNA	1							G
GluR2 adRNA	1							G			GluR2 adRNA	1							G
ADAR2 - GluR2 adRNA	1							G			ADAR2 - GluR2 adRNA	1							G
ADAR2 + GluR2 adRNA	1							G			ADAR2 + GluR2 adRNA	1							G
ADAR2 (E488Q) - Glu R2adRNA	1							G			ADAR2 (E488Q) - Glu R2adRNA	1							G
ADAR2 (E488Q) +GluR2 adRNA	1							G			ADAR2 (E488Q) +GluR2 adRNA	1							G
MS2 adRNA	1							G			MS2 adRNA	1							G
MCP-ADAR1 DD-NLS - MS2 adRNA	1							G			MCP-ADAR1 DD-NLS - MS2 adRNA	1							G
MCP-ADAR1 DD-NLS + MS2 adRNA	1							G			MCP-ADAR1 DD-NLS + MS2 adRNA	1							G
MCP-ADAR1 DD (E1008Q)-NLS - MS2 adRNA	1							G			MCP-ADAR1 DD (E1008Q)-NLS - MS2 adRNA	1							G
MCP-ADAR1 DD (E1008Q)-NLS +MS2 adRNA	1							G			MCP-ADAR1 DD (E1008Q)-NLS +MS2 adRNA	1							G
MCP-ADAR1 DD-NES - MS2 adRNA	1							G			MCP-ADAR1 DD-NES - MS2 adRNA	1							G
MCP-ADAR1 DD-NES + MS2 adRNA	1							G			MCP-ADAR1 DD-NES + MS2 adRNA	1							G
MCP-ADAR1 DD (E1008Q)-NES - MS2 adRNA	1							G			MCP-ADAR1 DD (E1008Q)-NES - MS2 adRNA	1							G
MCP-ADAR1 DD (E1008Q)-NES + MS2 adRNA	1							G			MCP-ADAR1 DD (E1008Q)-NES + MS2 adRNA	1							G
MCP-ADAR2 DD-NLS - MS2 adRNA	1							G			MCP-ADAR2 DD-NLS - MS2 adRNA	1							G
MCP-ADAR2 DD-NLS + MS2 adRNA	1							G			MCP-ADAR2 DD-NLS + MS2 adRNA	1							G
MCP-ADAR2 DD (E488Q)-NLS - MS2 adRNA	1							G			MCP-ADAR2 DD (E488Q)-NLS - MS2 adRNA	1							G
MCP-ADAR2 DD (E488Q)-NLS + MS2 adRNA	1							G			MCP-ADAR2 DD (E488Q)-NLS + MS2 adRNA	1							G
MCP-ADAR2 DD-NES - MS2 adRNA	1							G			MCP-ADAR2 DD-NES - MS2 adRNA	1							G
MCP-ADAR2 DD-NES + MS2 adRNA	1							G			MCP-ADAR2 DD-NES + MS2 adRNA	1							G
MCP-ADAR2 DD (E488Q)-NES - MS2 adRNA	1							G			MCP-ADAR2 DD (E488Q)-NES - MS2 adRNA	1							G
MCP-ADAR2 DD (E488Q)-NES + MS2 adRNA	1							G			MCP-ADAR2 DD (E488Q)-NES + MS2 adRNA	1							G
GFP	5							H			GFP	5							H
TadA-TadA*	3	3.06282e-08	36.3781	5.97272	0.64042	0.732896	23.1015	H			TadA-TadA*	3	0.00211794	5.99161	4.81269	0.0496519	0.125828	3.80491	H
ABE7.10	3	7.67757e-05	17.1722	3.92727	0.398295	0.553278	10.9051	H			ABE7.10	3	0.00718099	4.30196	5.15713	0.0353462	0.137963	2.73192	H
ABE7.10-site 1	3	5.44265e-06	28.0461	4.25446	0.406087	0.493036	17.8104	H			ABE7.10-site 1	3	0.114528	-1.92552	4.80053	-0.0662605	0.00991333	-1.22278	H
ABE7.10(D53E)-site 1	3	0.000178438	14.7893	3.76713	0.34189	0.504791	9.3918	H			ABE7.10(D53E)-site 1	3	0.320387	1.1457	3.71093	-0.0438604	0.102355	0.727569	H
ABE7.10(F148A)-site 1	3	0.0374715	2.66306	5.98326	0.00422402	0.100664	1.69115	H			ABE7.10(F148A)-site 1	3	0.070733	-2.25164	5.34083	-0.09373	0.00530889	-1.42988	H
ABE7.10-site 2	3	2.53308e-06	35.455	4.16134	0.52143	0.608583	22.5154	H			ABE7.10-site 2	3	0.00823369	4.08102	5.36162	0.0238348	0.100733	2.59161	H
ABE7.10(F148A)-site 2	3	3.7744e-05	11.7232	5.5958	0.163527	0.251745	7.4447	H			ABE7.10(F148A)-site 2	3	0.000226313	8.3809	5.59309	0.111454	0.205713	5.32221	H

## Sheet: Supp. table 9
Table S9: Data presented in fig. S6			Effect of base-editors on the editing level at conserved endogenous editing sites
A-to-G (conserved recoding index)					A-to-G (conserved recoding values - heatmap)
Editor	Index	Dataset				Dataset A								Dataset B								Dataset C					Dataset D					Dataset F							Dataset G
REPAIRv1(N81S)	0.0231481	A			Gene name	RESCUE	RESCUE+S375N	RESCUE+S375C	RESCUE+S375A	RESCUE+N473I	REPAIRv1(X85W)	REPAIRv2	REPAIRv1(N81S)	2BoxB-4LN-DD	2BoxB-4LN-DD NLS	2BoxB-4LN-DD E488Q	2BoxB-4LN-DD E488Q NLS	2BoxB-No enzyme	No guide-4LN-DD NLS	No guide-4LN-DD E488Q NLS	No guide-No enzyme	Cas9D10A	ABEmax	ABEmax (TadA E59A)	ABEmax (TadA E59A,TadA* E59A)	ABEmaxAW	GFP	ABEmax	miniABEmax	K20A/R21A	V82G	ctrl	SA1+gRNA	SA2+gRNA	SA1Q	SA2Q	SA1Q+gRNA	SA2Q+gRNA	293T	293T+GFP	ADAR2 - GluR2 adRNA	ADAR2 (E488Q) +GluR2 adRNA	ADAR2 + GluR2 adRNA	Cas13b-ADAR2 DD (E488Q) - gRNA	Cas13b-ADAR2 DD (E488Q) + gRNA	GluR2 adRNA	gRNA	MCP-ADAR1 DD (E1008Q)-NES - MS2 adRNA	MCP-ADAR1 DD (E1008Q)-NES + MS2 adRNA
REPAIRv1(N81S)	0.026936	A			AZIN1 (chr8:102829408)	0.0477778	0.03	0.0166667	0.0144444	0.0266667	0.045	0.0116667	0.0222222	0.04	0.02	0.07	0.02	0	0	0.01	0	0.00333333	0.00333333	0.0133333	0.01	0	0.01	0.00555556	0.00333333	0.00222222	0.00666667	0	0.005	0	0	0.005	0.005	0.005	0	0.01	0	0.34	0.05	0.09	0.02	NA	0	0.1	0.05
REPAIRv1(N81S)	0.0208333	A			AZIN1 (chr8:102829409)	0	0.00333333	0	0	0	0.005	0	0	0.01	0	0	0	0	0	0	0	0.00333333	0	0	0.00666667	0	0	0.00111111	0	0	0	0	0.005	0	0	0	0	0	0	0	0	0.13	0.05	0.02	0	NA	0	0.03	0.01
REPAIRv1(N81S)	0.03125	A			BLCAP (chr20:37519131)	0	0	0.0277778	0	0	0	0.0366667	0.00777778	0.06	0.08	0.12	0.07	0.03	0.02	0.03	0.05	NA	NA	0	0	0.17	0.0175	0.00888889	0.01	0.00888889	0.01	0.04	0.01	0.03	0.02	0.015	0.025	0.015	0.02	0.03	0.06	0.1	0	0	0.03	0	NA	0	0.03
REPAIRv1(N81S)	0.0176991	A			BLCAP (chr20:37519161)	0.05	0	0.0244444	0.0533333	0.0211111	0	0.02	0.0377778	0.15	0.16	0.19	0.06	0.06	0.07	0.14	0.08	NA	NA	NA	0	0	0.045	0.03	0.03	0.0277778	0.0288889	0.065	0.075	0.045	0.03	0.065	0.035	0.04	0.02	0.04	0.15	0.1	0	0.05	0.03	0	NA	0	0.03
REPAIRv1(N81S)	0.0454545	A			BLCAP (chr20:37519170)	0.145556	0.0188889	0.0822222	0.0522222	0.117778	0.121667	0.163333	0.0755556	0.28	0.35	0.41	0.37	0.17	0.16	0.3	0.23	NA	NA	NA	0	0.36	0.135	0.114444	0.114444	0.0855556	0.09	0.145	0.14	0.16	0.125	0.145	0.13	0.12	0.08	0.08	0.13	0.18	0	0.16	0.08	1	NA	0.11	0.09
REPAIRv1(N81S)	0.0932642	A			BLCAP (chr20:37519678)	NA	NA	NA	NA	NA	NA	NA	NA	NA	NA	NA	NA	NA	NA	NA	NA	NA	NA	NA	NA	NA	NA	NA	NA	NA	NA	NA	NA	NA	NA	NA	NA	NA	NA	NA	NA	NA	NA	NA	NA	NA	NA	NA	NA
REPAIRv1(N81S)	0.018018	A			C1QL1 (chr17:44967852)	0.195714	0.241111	0.20875	0.0322222	0.227143	0.07	0	0.131111	0	0.29	0	0	0	NA	0	0	NA	NA	NA	NA	NA	0	0	0	0	0	0	0	0	0	0.035	0	0.09	0	0	0.57	0	NA	0.33	0	NA	NA	0	0.04
REPAIRv1(N81S)	0.0416667	A			CACNA1D (chr3:53786865)	0	NA	NA	0	0	NA	NA	NA	0	0	0	0	0	0	0	0	NA	NA	NA	NA	NA	0	0	0	0	0	NA	0	0	0	0	0	0	0	NA	1	NA	NA	0	NA	NA	NA	NA	0
REPAIRv1(X85W)	0.03125	A			CADPS (chr3:62438132)	NA	NA	NA	NA	0	NA	0	NA	NA	NA	NA	NA	NA	0	NA	NA	NA	NA	NA	NA	NA	0	NA	0	NA	NA	0	0	0	0	0	0	0.03	NA	NA	NA	NA	NA	NA	NA	NA	NA	NA	NA
REPAIRv1(X85W)	0.0631068	A			COG3 (chr13:45516236)	0	0	0.166667	0	0	0.0416667	0.1	0.0471429	0.4	0.3	0.42	0.26	0.3	0.32	0.35	0.28	0.0966667	0.0933333	0.0333333	0.0966667	0.0466667	0.065	0.0311111	0.0422222	0.0455556	0.0466667	0.02	0	0.055	0	0.03	0	0.045	0.14	0	0.87	0.57	0.67	0.07	0.1	NA	NA	0	0.02
REPAIRv1(X85W)	0.0557769	A			COPA (chr1:160332454)	0.0155556	0	0	0.0155556	0.0233333	0.0283333	0.0116667	0.00444444	0.18	0.15	0.18	0.13	0.06	0.09	0.11	0.06	0.01	0.02	0.02	0	0	0.02	0.0533333	0.0511111	0.0188889	0.00888889	0.01	0	0.045	0.005	0.04	0	0.075	0.01	0.01	0.41	0.38	0.17	0.03	0.01	0	0	0	0.02
REPAIRv1(X85W)	0.0197044	A			CYFIP2 (chr5:157309800)	0	0	0	0	0	0	0	0.00777778	0.11	0.02	0.13	0.04	0	0	0.01	0	0	0	0	0	0	0	0.0433333	0.0466667	0.00333333	0.00777778	0	0	0	0	0.005	0	0	0	0.03	0.7	0.63	1	0	0	0	NA	0	0
REPAIRv1(X85W)	0.065	A			DACT3 (chr19:46649597)	0.25	0	1	0.333333	0.625	0.333333	0	0.666667	NA	NA	NA	NA	0	NA	NA	NA	NA	NA	NA	NA	NA	0.5	0	NA	NA	0.5	0	0	NA	NA	NA	1	NA	0	NA	NA	NA	NA	NA	NA	NA	NA	NA	NA
REPAIRv1(X85W)	0.0342466	A			FLNA (chrX:154351369)	NA	NA	NA	NA	NA	NA	NA	NA	NA	NA	NA	NA	NA	NA	NA	NA	NA	NA	NA	NA	NA	NA	NA	NA	NA	NA	NA	NA	NA	NA	NA	NA	NA	NA	NA	NA	NA	NA	NA	NA	NA	NA	NA	NA
REPAIRv2	0.0253165	A			FLNA (chrX:154351582)	0.0144444	0	0.0133333	0	0	0.005	0	0.00333333	0.19	0.17	0.3	0.31	0	0.01	0.14	0	0	0	0	0	0	0.0025	0.0111111	0.0111111	0.00222222	0	0	0	0	0	0	0	0	0	0	0.72	0.8	0.43	0.04	0.03	NA	0	0.18	0.12
REPAIRv2	0.0324074	A			FLNB (chr3:58156074)	0	0	0	0	0	0.0116667	0	0	0.08	0.03	0.15	0.09	0	0.01	0.04	0	NA	0	0	0	NA	0	0.00888889	0.01	0.00222222	0.00222222	0	0	0	0	0.025	0	0.01	0.02	0	0.82	0.95	0.67	0.03	0	0	NA	0	0.03
REPAIRv2	0	A			GABRA3 (chrX:152189847)	NA	1	NA	NA	NA	NA	NA	NA	0.5	NA	0	0.5	0	NA	0	NA	NA	NA	NA	NA	NA	0	0.0133333	0	0.0811111	0.0188889	NA	NA	NA	NA	NA	NA	NA	NA	NA	NA	NA	NA	1	1	NA	NA	NA	NA
REPAIRv2	0.00913242	A			GRIA2 (chr4:157336723)	NA	NA	NA	NA	NA	NA	NA	NA	NA	NA	1	NA	NA	NA	NA	NA	NA	NA	NA	NA	NA	1	0.666667	0	0	NA	NA	NA	NA	NA	NA	0	NA	NA	NA	NA	NA	NA	NA	NA	NA	NA	NA	NA
REPAIRv2	0.021978	A			GRIA2 (chr4:157336727)	NA	NA	NA	NA	NA	NA	NA	NA	NA	NA	0	NA	NA	NA	NA	NA	NA	NA	NA	NA	NA	0	0	0	0	NA	NA	NA	NA	NA	NA	0	NA	NA	NA	NA	NA	NA	NA	NA	NA	NA	NA	NA
REPAIRv2	0.0123457	A			GRIA2 (chr4:157336984)	NA	NA	NA	NA	NA	NA	NA	NA	NA	NA	NA	NA	NA	NA	NA	NA	NA	NA	NA	NA	NA	NA	NA	NA	NA	NA	NA	NA	NA	NA	NA	NA	NA	NA	NA	NA	NA	NA	NA	NA	NA	NA	NA	NA
RESCUE	0.0472441	A			GRIA2 (chr4:157336985)	NA	NA	NA	NA	NA	NA	NA	NA	NA	NA	NA	NA	NA	NA	NA	NA	NA	NA	NA	NA	NA	NA	NA	NA	NA	NA	NA	NA	NA	NA	NA	NA	NA	NA	NA	NA	NA	NA	NA	NA	NA	NA	NA	NA
RESCUE	0.0604396	A			GRIA2 (chr4:157360142)	NA	NA	NA	NA	0	NA	NA	NA	1	0	NA	0	NA	NA	NA	NA	NA	NA	NA	NA	NA	NA	0	0	0	0	NA	NA	0	NA	NA	0	NA	NA	NA	NA	NA	NA	NA	NA	NA	NA	NA	NA
RESCUE	0.0361991	A			GRIA3 (chrX:123465111)	NA	NA	NA	NA	NA	NA	NA	NA	NA	NA	NA	NA	NA	NA	NA	NA	NA	NA	NA	NA	NA	NA	NA	NA	NA	NA	NA	0	NA	NA	NA	NA	NA	NA	NA	NA	NA	NA	NA	NA	NA	NA	NA	NA
RESCUE	0.0722222	A			GRIA3 (chrX:123465147)	NA	NA	NA	NA	NA	NA	NA	NA	NA	NA	NA	NA	NA	NA	NA	NA	NA	NA	NA	NA	NA	NA	NA	NA	NA	NA	NA	NA	NA	NA	NA	NA	NA	NA	NA	NA	NA	NA	NA	NA	NA	NA	NA	NA
RESCUE	0.0230415	A			GRIA4 (chr11:105933968)	NA	0	NA	NA	NA	NA	NA	NA	NA	NA	NA	NA	NA	NA	NA	NA	NA	NA	NA	NA	NA	0.25	0	0	0	0	0	NA	NA	NA	NA	0	NA	NA	NA	NA	NA	NA	NA	NA	NA	NA	NA	NA
RESCUE	0.0227273	A			GRIA4 (chr11:105944405)	NA	NA	NA	NA	NA	NA	NA	NA	NA	NA	NA	NA	NA	NA	NA	NA	NA	NA	NA	NA	NA	NA	NA	NA	NA	NA	NA	NA	NA	NA	NA	NA	NA	NA	NA	NA	NA	NA	NA	NA	NA	NA	NA	NA
RESCUE	0.0438596	A			GRIA4 (chr11:105945379)	NA	NA	NA	NA	NA	NA	NA	NA	NA	NA	NA	NA	NA	NA	NA	NA	NA	NA	NA	NA	NA	NA	NA	NA	NA	NA	NA	NA	NA	NA	NA	NA	NA	NA	NA	NA	NA	NA	NA	NA	NA	NA	NA	NA
RESCUE	0.0217391	A			GRIA4 (chr11:105945402)	NA	NA	NA	NA	NA	NA	NA	NA	NA	NA	NA	NA	NA	NA	NA	NA	NA	NA	NA	NA	NA	NA	NA	NA	NA	NA	NA	NA	NA	NA	NA	NA	NA	NA	NA	NA	NA	NA	NA	NA	NA	NA	NA	NA
RESCUE	0.0406504	A			GRIA4 (chr11:105945418)	NA	NA	NA	NA	NA	NA	NA	NA	NA	NA	NA	NA	NA	NA	NA	NA	NA	NA	NA	NA	NA	NA	NA	NA	NA	NA	NA	NA	NA	NA	NA	NA	NA	NA	NA	NA	NA	NA	NA	NA	NA	NA	NA	NA
RESCUE+N473I	0.0251572	A			GRIA4 (chr11:105945433)	NA	NA	NA	NA	NA	NA	NA	NA	NA	NA	NA	NA	NA	NA	NA	NA	NA	NA	NA	NA	NA	NA	NA	NA	NA	NA	NA	NA	NA	NA	NA	NA	NA	NA	NA	NA	NA	NA	NA	NA	NA	NA	NA	NA
RESCUE+N473I	0.0274725	A			GRIK1 (chr21:29581430)	0	NA	NA	NA	NA	NA	NA	NA	0	0	NA	NA	NA	NA	0	0	NA	NA	NA	NA	NA	0	0	NA	0	0	0	NA	NA	NA	NA	NA	NA	NA	NA	NA	NA	NA	NA	NA	NA	NA	NA	NA
RESCUE+N473I	0.0141509	A			GRIK2 (chr6:101889814)	NA	0	NA	0	NA	NA	NA	NA	0	0.5	NA	NA	0	0	0	0	NA	NA	NA	NA	NA	0	0	0	0	0	NA	NA	NA	NA	NA	0	NA	0	NA	1	NA	NA	NA	0	NA	NA	NA	0
RESCUE+N473I	0.0365854	A			GRIK2 (chr6:101889827)	NA	NA	NA	0	NA	NA	NA	NA	0.25	0.5	NA	NA	0	0	0	0	NA	NA	NA	NA	NA	0	0	0	0	0	NA	NA	NA	NA	NA	0	NA	NA	NA	1	NA	NA	NA	0	NA	NA	NA	NA
RESCUE+N473I	0.0238095	A			GRIK2 (chr6:101924714)	NA	0	NA	0	0	NA	NA	NA	0	0.5	0	NA	0	0	0	NA	NA	NA	NA	NA	NA	0	0	0	0	0	NA	NA	NA	NA	NA	NA	NA	NA	NA	NA	NA	NA	NA	NA	NA	NA	NA	0
RESCUE+N473I	0.021978	A			GRIK2 (chr6:101924755)	NA	NA	NA	NA	NA	NA	NA	NA	NA	NA	NA	NA	NA	NA	NA	NA	NA	NA	NA	NA	NA	NA	NA	NA	NA	NA	NA	NA	NA	NA	NA	NA	NA	NA	NA	NA	NA	NA	NA	NA	NA	NA	NA	NA
RESCUE+N473I	0.0255102	A			GRIK2 (chr6:101926741)	NA	NA	NA	NA	NA	NA	NA	NA	NA	NA	NA	NA	NA	NA	NA	NA	NA	NA	NA	NA	NA	NA	NA	NA	NA	NA	NA	NA	NA	NA	NA	NA	NA	NA	NA	NA	NA	NA	NA	NA	NA	NA	NA	NA
RESCUE+N473I	0.0391061	A			GRIK2 (chr6:101926768)	NA	NA	NA	NA	NA	NA	NA	NA	NA	NA	NA	NA	NA	NA	NA	NA	NA	NA	NA	NA	NA	NA	NA	NA	NA	NA	NA	NA	NA	NA	NA	NA	NA	NA	NA	NA	NA	NA	NA	NA	NA	NA	NA	NA
RESCUE+N473I	0.0131579	A			GRM4 (chr6:34133126)	NA	NA	1	0	0	NA	NA	0	0.25	0	NA	NA	NA	0	0.11	0	NA	NA	NA	NA	NA	0	0	0	0	0	0	0	NA	NA	NA	NA	NA	NA	NA	NA	NA	NA	0	NA	NA	NA	NA	NA
RESCUE+S375A	0.0224215	A			HTR2C (chrX:114848119)	NA	NA	NA	NA	NA	NA	NA	NA	NA	NA	NA	NA	NA	NA	NA	NA	NA	NA	NA	NA	NA	0	NA	0	NA	0	NA	NA	NA	NA	NA	NA	NA	NA	NA	NA	NA	NA	NA	NA	NA	NA	NA	NA
RESCUE+S375A	0.021978	A			HTR2C (chrX:114848121)	NA	NA	NA	NA	NA	NA	NA	NA	NA	NA	NA	NA	NA	NA	NA	NA	NA	NA	NA	NA	NA	0	NA	0	NA	0	NA	NA	NA	NA	NA	NA	NA	NA	NA	NA	NA	NA	NA	NA	NA	NA	NA	NA
RESCUE+S375A	0.0240385	A			HTR2C (chrX:114848126)	NA	NA	NA	NA	NA	NA	NA	NA	NA	NA	NA	NA	NA	NA	NA	NA	NA	NA	NA	NA	NA	0	NA	0	NA	0	NA	NA	NA	NA	NA	NA	NA	NA	NA	NA	NA	NA	NA	NA	NA	NA	NA	NA
RESCUE+S375A	0	A			HTR2C (chrX:114848131)	NA	NA	NA	NA	NA	NA	NA	NA	NA	NA	NA	NA	NA	NA	NA	NA	NA	NA	NA	NA	NA	0	NA	0	NA	0	NA	NA	NA	NA	NA	NA	NA	NA	NA	NA	NA	NA	NA	NA	NA	NA	NA	NA
RESCUE+S375A	0.0136986	A			IGFBP7 (chr4:57110068)	0	0.2	0.2	0	0.25	0.276667	0.125	0.333333	0.14	0	0.33	0.33	0	NA	0	0	NA	NA	NA	NA	NA	0	0	0	0	0	0	0	0.115	0.145	0.24	0.015	0.27	0	0	1	1	NA	0.33	0.13	NA	NA	0	0.6
RESCUE+S375A	0.0188679	A			IGFBP7 (chr4:57110120)	NA	NA	NA	NA	NA	NA	NA	NA	NA	NA	NA	NA	NA	NA	NA	NA	NA	NA	NA	NA	NA	NA	NA	NA	NA	NA	NA	NA	NA	NA	NA	NA	NA	NA	NA	NA	NA	NA	NA	NA	NA	NA	NA	NA
RESCUE+S375A	0.00980392	A			KCNA1 (chr12:4912576)	NA	0	0	0	NA	0	NA	NA	NA	0	1	NA	NA	NA	NA	NA	NA	NA	NA	NA	NA	0	0	0	0	0	0	NA	NA	NA	NA	0	0	NA	NA	NA	NA	NA	NA	NA	NA	NA	NA	NA
RESCUE+S375A	0.0272374	A			MIR27B (chr9:95085457)	NA	NA	NA	NA	NA	NA	NA	NA	NA	NA	NA	NA	NA	NA	NA	NA	NA	NA	NA	NA	NA	NA	NA	NA	NA	NA	NA	NA	NA	NA	NA	NA	NA	NA	NA	NA	NA	NA	NA	NA	NA	NA	NA	NA
RESCUE+S375A	0.0147059	A			MIR376C (chr14:101039737)	NA	NA	NA	NA	NA	NA	NA	NA	NA	NA	NA	NA	NA	NA	NA	NA	NA	NA	NA	NA	NA	NA	NA	NA	NA	NA	NA	NA	NA	NA	NA	NA	NA	NA	NA	NA	NA	NA	NA	NA	NA	NA	NA	NA
RESCUE+S375C	0.030303	A			NOVA1 (chr14:26448324)	0.166667	0	0	0	0.25	0.166667	0	0.19	0.15	0.06	0.27	0.33	0	0	0.1	0	NA	NA	NA	NA	NA	0	0	0	0.0744444	0	0	0	0	0	0	0.055	0.25	0	0	1	NA	NA	0.67	0	NA	NA	0.5	0.4
RESCUE+S375C	0.0290698	A			PUM2 (chr2:20251058)	NA	NA	NA	NA	NA	NA	NA	NA	NA	NA	NA	NA	NA	NA	NA	NA	0.00333333	0	0.04	0	0	NA	NA	NA	NA	NA	NA	NA	NA	NA	NA	NA	NA	NA	NA	NA	NA	NA	NA	NA	NA	NA	NA	NA
RESCUE+S375C	0.026178	A			SLC9A6 (chrX:136028896)	NA	NA	NA	NA	NA	NA	NA	NA	NA	NA	NA	NA	NA	NA	NA	NA	NA	NA	NA	NA	NA	NA	NA	NA	NA	NA	NA	NA	NA	NA	NA	NA	NA	NA	NA	NA	NA	NA	NA	NA	NA	NA	NA	NA
RESCUE+S375C	0.0146341	A			SLC9A6 (chrX:136028911)	NA	NA	NA	NA	NA	NA	NA	NA	NA	NA	NA	NA	NA	NA	NA	NA	NA	NA	NA	NA	NA	NA	NA	NA	NA	NA	NA	NA	NA	NA	NA	NA	NA	NA	NA	NA	NA	NA	NA	NA	NA	NA	NA	NA
RESCUE+S375C	0.0245098	A			SON (chr21:33550495)	0.0522222	0.0177778	0.0155556	0.00666667	0.0377778	0.0583333	0.005	0.0255556	0.25	0.2	0.3	0.33	0	0	0.15	0	0	0	0	0	NA	0	0.00777778	0.01	0.00222222	0.00222222	0	0	0	0	0.005	0.005	0.01	0	0	0.58	0.7	0.77	0.09	0.05	0	0	0.05	0.08
RESCUE+S375C	0.0164835	A			SON (chr21:33551013)	0.124444	0.106667	0.0577778	0.0866667	0.0411111	0.166667	0.055	0.146667	0.41	0.36	0.37	0.39	0.02	0.02	0.23	0.02	0	0.1	0.055	0.12	0.265	0.045	0.0455556	0.0333333	0.0311111	0.0422222	0.01	0.025	0.01	0.04	0.07	0.045	0.085	0.01	0.02	0.52	0.64	0.34	0.19	0.1	0	0	0.24	0.15
RESCUE+S375C	0.0326797	A			TCHZ2 (chr20:53488379)	NA	NA	NA	NA	NA	NA	NA	NA	NA	NA	NA	NA	NA	NA	NA	NA	NA	NA	NA	NA	NA	NA	NA	NA	NA	NA	NA	NA	NA	NA	NA	NA	NA	NA	NA	NA	NA	NA	NA	NA	NA	NA	NA	NA
RESCUE+S375C	0.015873	A			TMEM63B (chr6:44152612)	0.0466667	0.0644444	0	0	0	0.0183333	0	0.0344444	0.04	0.02	0.15	0.08	0	0.01	0.03	0	0.1	0	0	0	NA	0.0025	0.00333333	0.00666667	0.00555556	0.00111111	0.005	0	0	0	0	0	0.005	0	0	0.6	0.67	NA	0	0	0	NA	0	0
RESCUE+S375C	0.0240385	A			uc003qnc.2 (chr6:149772198)	NA	NA	NA	NA	NA	NA	NA	NA	NA	NA	NA	NA	NA	NA	NA	NA	0	0	0	0	0	NA	NA	NA	NA	NA	NA	NA	NA	NA	NA	NA	NA	NA	NA	NA	NA	NA	NA	NA	NA	NA	NA	NA
RESCUE+S375N	0.0330189	A			UNC80 (chr2:209970889)	NA	0	NA	NA	NA	NA	NA	NA	NA	NA	NA	NA	NA	NA	NA	NA	NA	NA	NA	NA	NA	NA	NA	0	0	0	NA	NA	NA	NA	NA	NA	NA	NA	NA	NA	NA	NA	NA	NA	NA	NA	NA	NA
RESCUE+S375N	0.0203046	A
RESCUE+S375N	0.0392157	A
RESCUE+S375N	0.037037	A
RESCUE+S375N	0.0169492	A
RESCUE+S375N	0.015873	A
RESCUE+S375N	0.0331492	A
RESCUE+S375N	0.0220588	A
RESCUE+S375N	0.0233918	A
2BoxB-4LN-DD	0.199216	B
2BoxB-4LN-DD E488Q	0.228831	B
2BoxB-4LN-DD E488Q NLS	0.208221	B
2BoxB-4LN-DD NLS	0.161862	B
2BoxB-No enzyme	0.0271707	B
No guide-4LN-DD E488Q NLS	0.122698	B
No guide-4LN-DD NLS	0.0357883	B
No guide-No enzyme	0.0305741	B
ABEmax	0.021978	C
ABEmax	0.0592593	C
ABEmax	0.0535714	C
ABEmaxAW	0.0571429	C
ABEmaxAW	0.0606061	C
ABEmaxAW	0.060241	C
ABETadAE59A	0	C
ABETadAE59A	0.0478723	C
ABETadAE59A	0.0142857	C
ABETadAE59ATadAevoE59A	0.0545455	C
ABETadAE59ATadAevoE59A	0.039604	C
ABETadAE59ATadAevoE59A	0.0512821	C
Cas9D10A	0.0671642	C
Cas9D10A	0.0128205	C
Cas9D10A	0.0769231	C
ABEmax	0.0188955	D
ABEmax	0.0265303	D
ABEmax	0.0276638	D
ABEmax	0.016129	D
ABEmax	0.0237932	D
ABEmax	0.0280101	D
ABEmax	0.0231873	D
ABEmax	0.0277303	D
ABEmax	0.024021	D
GFP	0.00937852	D
GFP	0.0108234	D
GFP	0.010023	D
GFP	0.0242942	D
K20A/R21A	0.00722326	D
K20A/R21A	0.0129135	D
K20A/R21A	0.0160354	D
K20A/R21A	0.00796662	D
K20A/R21A	0.0108206	D
K20A/R21A	0.0118246	D
K20A/R21A	0.00936477	D
K20A/R21A	0.0103776	D
K20A/R21A	0.0122855	D
miniABEmax	0.0148791	D
miniABEmax	0.0283301	D
miniABEmax	0.0292432	D
miniABEmax	0.0185711	D
miniABEmax	0.0259296	D
miniABEmax	0.0327056	D
miniABEmax	0.0222979	D
miniABEmax	0.017257	D
miniABEmax	0.0238031	D
V82G	0.00805613	D
V82G	0.0115369	D
V82G	0.00908279	D
V82G	0.00837412	D
V82G	0.0107309	D
V82G	0.0092636	D
V82G	0.00662518	D
V82G	0.00755845	D
V82G	0.0124918	D
ctrl	0.0193299	E
ctrl	0.0118416	E
SA1+gRNA	0.0162291	E
SA1+gRNA	0.0125581	E
SA1Q	0.0168138	E
SA1Q	0.0109312	E
SA1Q+gRNA	0.0176456	E
SA1Q+gRNA	0.0149232	E
SA2+gRNA	0.019286	E
SA2+gRNA	0.018107	E
SA2Q	0.0274295	E
SA2Q	0.0311898	E
SA2Q+gRNA	0.0314067	E
SA2Q+gRNA	0.0330554	E
293T	0.0123119	F
293T+GFP	0.015625	F
ADAR2 - GluR2 adRNA	0.384615	F
ADAR2 (E488Q) - Glu R2adRNA	0.358484	F
ADAR2 (E488Q) +GluR2 adRNA	0.46832	F
ADAR2 + GluR2 adRNA	0.317881	F
Cas13b-ADAR2 DD (E488Q) - gRNA	0.0740578	F
Cas13b-ADAR2 DD (E488Q) + gRNA	0.0363636	F
GluR2 adRNA	0.0769231	F
gRNA	0	F
MCP-ADAR1 DD (E1008Q)-NES - MS2 adRNA	0.0866035	F
MCP-ADAR1 DD (E1008Q)-NES + MS2 adRNA	0.0772503	F
MCP-ADAR1 DD (E1008Q)-NLS - MS2 adRNA	0.193575	F
MCP-ADAR1 DD (E1008Q)-NLS +MS2 adRNA	0.220598	F
MCP-ADAR1 DD-NES - MS2 adRNA	0.0581761	F
MCP-ADAR1 DD-NES + MS2 adRNA	0.0539216	F
MCP-ADAR1 DD-NLS - MS2 adRNA	0.0785124	F
MCP-ADAR1 DD-NLS + MS2 adRNA	0.0875286	F
MCP-ADAR2 DD (E488Q)-NES - MS2 adRNA	0.0530184	F
MCP-ADAR2 DD (E488Q)-NES + MS2 adRNA	0.0545047	F
MCP-ADAR2 DD (E488Q)-NLS - MS2 adRNA	0.110743	F
MCP-ADAR2 DD (E488Q)-NLS + MS2 adRNA	0.149338	F
MCP-ADAR2 DD-NES - MS2 adRNA	0.0365763	F
MCP-ADAR2 DD-NES + MS2 adRNA	0.0443314	F
MCP-ADAR2 DD-NLS - MS2 adRNA	0.0515749	F
MCP-ADAR2 DD-NLS + MS2 adRNA	0.069517	F
ABE7.10	0.0284392	G
ABE7.10	0.0153563	G
ABE7.10	0.0393152	G
ABE7.10(D53E)-site 1	0.0224719	G
ABE7.10(D53E)-site 1	0.0266548	G
ABE7.10(D53E)-site 1	0.0304762	G
ABE7.10(F148A)-site 1	0.0381432	G
ABE7.10(F148A)-site 1	0.0138037	G
ABE7.10(F148A)-site 1	0.025248	G
ABE7.10(F148A)-site 2	0.0411724	G
ABE7.10(F148A)-site 2	0.0379589	G
ABE7.10(F148A)-site 2	0.0467532	G
ABE7.10-site 1	0.0251027	G
ABE7.10-site 1	0.0240566	G
ABE7.10-site 1	0.0244648	G
ABE7.10-site 2	0.033526	G
ABE7.10-site 2	0.0279405	G
ABE7.10-site 2	0.0303359	G
GFP	0.0291074	G
GFP	0.0342342	G
GFP	0.0318396	G
GFP	0.0361528	G
GFP	0.0292612	G
GFP	0.0251479	G
TadA-TadA*	0.0271713	G
TadA-TadA*	0.0276276	G
TadA-TadA*	0.0310633	G
[truncated: 22 more columns]

## Sheet: Supp. table 10
Table S10: Data presented in figure S7		Global off-target activity, for all samples studied, for synonymous and non-synonymous mutations, conservative and non-conservative amino-acid substitutions, deciles of gene expression, essential genes, oncogenes, and a set of clinically relevant amino-acid substitutions
Index by annotations (A-to-G)						Index by annotations (C-to-T)						Index by amino-acids (A-to-G)						Index by amino-acids (C-to-T)						Index by expression (A-to-G)						Index by expression (C-to-T)						Index for sites of special interest (A-to-G)						Index for sites of special interest (C-to-T)
Run	Editor	Annotation	Index	Dataset		Run	Editor	Annotation	Index	Dataset		Run	Editor	Amino-acids group	Index	Dataset		Run	Editor	Amino-acids group	Index	Dataset		Run	Editor	Expression decile	Index	Dataset		Run	Editor	Expression decile	Index	Dataset		Run	Editor	Sites of interest	Index	Dataset		Run	Editor	Sites of interest	Index	Dataset
SRR10523701	RESCUE+S375N	non-syn	0.357941	A		SRR10523701	RESCUE+S375N	non-syn	0.357941	A		SRR10523701	RESCUE+S375N	Non-conservative	0.666331	A		SRR10523701	RESCUE+S375N	Non-conservative	0.175326	A		SRR10523742	REPAIRv1(X85W)	10th	0.770591	A		SRR10523742	REPAIRv1(X85W)	10th	0.0790282	A		SRR10523709	REPAIRv1(N81S)	Oncogenes	0.22722	A		SRR10523709	REPAIRv1(N81S)	Oncogenes	0.048621	A
SRR10523701	RESCUE+S375N	syn	0.319932	A		SRR10523701	RESCUE+S375N	syn	0.319932	A		SRR10523701	RESCUE+S375N	Conservative	0.627973	A		SRR10523701	RESCUE+S375N	Conservative	0.0812773	A		SRR10523707	RESCUE+S375C	10th	0.181575	A		SRR10523707	RESCUE+S375C	10th	0.105513	A		SRR10523762	REPAIRv1(N81S)	Oncogenes	0.18539	A		SRR10523762	REPAIRv1(N81S)	Oncogenes	0.0487825	A
SRR10523702	REPAIRv1(N81S)	non-syn	0.0675596	A		SRR10523702	REPAIRv1(N81S)	non-syn	0.0675596	A		SRR10523702	REPAIRv1(N81S)	Non-conservative	0.465905	A		SRR10523702	REPAIRv1(N81S)	Non-conservative	0.0797047	A		SRR10523735	RESCUE	10th	0.647497	A		SRR10523735	RESCUE	10th	0.143599	A		SRR10523740	REPAIRv1(N81S)	Oncogenes	0.219292	A		SRR10523740	REPAIRv1(N81S)	Oncogenes	0.0481885	A
SRR10523702	REPAIRv1(N81S)	syn	0.0998625	A		SRR10523702	REPAIRv1(N81S)	syn	0.0998625	A		SRR10523702	REPAIRv1(N81S)	Conservative	0.458285	A		SRR10523702	REPAIRv1(N81S)	Conservative	0.0750931	A		SRR10523750	RESCUE+S375A	10th	0.107304	A		SRR10523750	RESCUE+S375A	10th	0.103354	A		SRR10523720	REPAIRv1(N81S)	Oncogenes	0.21686	A		SRR10523720	REPAIRv1(N81S)	Oncogenes	0.051273	A
SRR10523703	REPAIRv2	non-syn	0.0612677	A		SRR10523703	REPAIRv2	non-syn	0.0612677	A		SRR10523703	REPAIRv2	Non-conservative	0.144695	A		SRR10523703	REPAIRv2	Non-conservative	0.0791103	A		SRR10523739	RESCUE+S375N	10th	0.388521	A		SRR10523739	RESCUE+S375N	10th	0.106541	A		SRR10523709	REPAIRv1(N81S)	Oncogenes	0.22722	A		SRR10523709	REPAIRv1(N81S)	Oncogenes	0.048621	A
SRR10523703	REPAIRv2	syn	0.0892433	A		SRR10523703	REPAIRv2	syn	0.0892433	A		SRR10523703	REPAIRv2	Conservative	0.0889968	A		SRR10523703	REPAIRv2	Conservative	0.0733582	A		SRR10523729	RESCUE+S375C	10th	0.167696	A		SRR10523729	RESCUE+S375C	10th	0.101616	A		SRR10523731	REPAIRv1(N81S)	Oncogenes	0.163061	A		SRR10523731	REPAIRv1(N81S)	Oncogenes	0.0482602	A
SRR10523704	RESCUE	non-syn	0.359931	A		SRR10523704	RESCUE	non-syn	0.359931	A		SRR10523704	RESCUE	Non-conservative	0.984285	A		SRR10523704	RESCUE	Non-conservative	0.261409	A		SRR10523709	REPAIRv1(N81S)	10th	0.293089	A		SRR10523709	REPAIRv1(N81S)	10th	0.0768517	A		SRR10523762	REPAIRv1(N81S)	Oncogenes	0.18539	A		SRR10523762	REPAIRv1(N81S)	Oncogenes	0.0487825	A
SRR10523704	RESCUE	syn	0.345328	A		SRR10523704	RESCUE	syn	0.345328	A		SRR10523704	RESCUE	Conservative	0.95442	A		SRR10523704	RESCUE	Conservative	0.0926962	A		SRR10523732	RESCUE+N473I	10th	0.392103	A		SRR10523732	RESCUE+N473I	10th	0.110229	A		SRR10523740	REPAIRv1(N81S)	Oncogenes	0.219292	A		SRR10523740	REPAIRv1(N81S)	Oncogenes	0.0481885	A
SRR10523705	RESCUE+N473I	non-syn	0.266641	A		SRR10523705	RESCUE+N473I	non-syn	0.266641	A		SRR10523705	RESCUE+N473I	Non-conservative	0.549353	A		SRR10523705	RESCUE+N473I	Non-conservative	0.141875	A		SRR10523723	REPAIRv1(X85W)	10th	0.885921	A		SRR10523723	REPAIRv1(X85W)	10th	0.0772634	A		SRR10523749	REPAIRv1(N81S)	Oncogenes	0.21086	A		SRR10523749	REPAIRv1(N81S)	Oncogenes	0.0482059	A
SRR10523705	RESCUE+N473I	syn	0.255675	A		SRR10523705	RESCUE+N473I	syn	0.255675	A		SRR10523705	RESCUE+N473I	Conservative	0.532724	A		SRR10523705	RESCUE+N473I	Conservative	0.0801297	A		SRR10523726	RESCUE	10th	0.56435	A		SRR10523726	RESCUE	10th	0.134783	A		SRR10523720	REPAIRv1(N81S)	Oncogenes	0.21686	A		SRR10523720	REPAIRv1(N81S)	Oncogenes	0.051273	A
SRR10523706	RESCUE+S375A	non-syn	0.29933	A		SRR10523706	RESCUE+S375A	non-syn	0.29933	A		SRR10523706	RESCUE+S375A	Non-conservative	0.18009	A		SRR10523706	RESCUE+S375A	Non-conservative	0.148022	A		SRR10523714	RESCUE+N473I	10th	0.359137	A		SRR10523714	RESCUE+N473I	10th	0.103392	A		SRR10523731	REPAIRv1(N81S)	Oncogenes	0.163061	A		SRR10523731	REPAIRv1(N81S)	Oncogenes	0.0482602	A
SRR10523706	RESCUE+S375A	syn	0.278442	A		SRR10523706	RESCUE+S375A	syn	0.278442	A		SRR10523706	RESCUE+S375A	Conservative	0.169797	A		SRR10523706	RESCUE+S375A	Conservative	0.07457	A		SRR10523734	REPAIRv1(X85W)	10th	0.675386	A		SRR10523734	REPAIRv1(X85W)	10th	0.0772437	A		SRR10523749	REPAIRv1(N81S)	Oncogenes	0.21086	A		SRR10523749	REPAIRv1(N81S)	Oncogenes	0.0482059	A
SRR10523707	RESCUE+S375C	non-syn	0.320623	A		SRR10523707	RESCUE+S375C	non-syn	0.320623	A		SRR10523707	RESCUE+S375C	Non-conservative	0.300959	A		SRR10523707	RESCUE+S375C	Non-conservative	0.156907	A		SRR10523762	REPAIRv1(N81S)	10th	0.254407	A		SRR10523762	REPAIRv1(N81S)	10th	0.0804057	A		SRR10523702	REPAIRv1(N81S)	Oncogenes	0.24366	A		SRR10523702	REPAIRv1(N81S)	Oncogenes	0.0476266	A
SRR10523707	RESCUE+S375C	syn	0.287191	A		SRR10523707	RESCUE+S375C	syn	0.287191	A		SRR10523707	RESCUE+S375C	Conservative	0.2981	A		SRR10523707	RESCUE+S375C	Conservative	0.0785963	A		SRR10523740	REPAIRv1(N81S)	10th	0.29351	A		SRR10523740	REPAIRv1(N81S)	10th	0.0817585	A		SRR10523766	REPAIRv1(N81S)	Oncogenes	0.217723	A		SRR10523766	REPAIRv1(N81S)	Oncogenes	0.0482402	A
SRR10523708	RESCUE+S375N	non-syn	0.317366	A		SRR10523708	RESCUE+S375N	non-syn	0.317366	A		SRR10523708	RESCUE+S375N	Non-conservative	0.63103	A		SRR10523708	RESCUE+S375N	Non-conservative	0.166858	A		SRR10523756	REPAIRv1(X85W)	10th	0.858697	A		SRR10523756	REPAIRv1(X85W)	10th	0.0808093	A		SRR10523753	REPAIRv1(N81S)	Oncogenes	0.224271	A		SRR10523753	REPAIRv1(N81S)	Oncogenes	0.0473941	A
SRR10523708	RESCUE+S375N	syn	0.294892	A		SRR10523708	RESCUE+S375N	syn	0.294892	A		SRR10523708	RESCUE+S375N	Conservative	0.589056	A		SRR10523708	RESCUE+S375N	Conservative	0.0801907	A		SRR10523711	REPAIRv2	10th	0.097047	A		SRR10523711	REPAIRv2	10th	0.0820349	A		SRR10523702	REPAIRv1(N81S)	Oncogenes	0.24366	A		SRR10523702	REPAIRv1(N81S)	Oncogenes	0.0476266	A
SRR10523709	REPAIRv1(N81S)	non-syn	0.222848	A		SRR10523709	REPAIRv1(N81S)	non-syn	0.222848	A		SRR10523709	REPAIRv1(N81S)	Non-conservative	0.424653	A		SRR10523709	REPAIRv1(N81S)	Non-conservative	0.0761818	A		SRR10523757	RESCUE	10th	0.702202	A		SRR10523757	RESCUE	10th	0.151448	A		SRR10523766	REPAIRv1(N81S)	Oncogenes	0.217723	A		SRR10523766	REPAIRv1(N81S)	Oncogenes	0.0482402	A
SRR10523709	REPAIRv1(N81S)	syn	0.247883	A		SRR10523709	REPAIRv1(N81S)	syn	0.247883	A		SRR10523709	REPAIRv1(N81S)	Conservative	0.420317	A		SRR10523709	REPAIRv1(N81S)	Conservative	0.071464	A		SRR10523705	RESCUE+N473I	10th	0.347411	A		SRR10523705	RESCUE+N473I	10th	0.10416	A		SRR10523753	REPAIRv1(N81S)	Oncogenes	0.224271	A		SRR10523753	REPAIRv1(N81S)	Oncogenes	0.0473941	A
SRR10523710	REPAIRv1(X85W)	non-syn	0.0682371	A		SRR10523710	REPAIRv1(X85W)	non-syn	0.0682371	A		SRR10523710	REPAIRv1(X85W)	Non-conservative	1.14755	A		SRR10523710	REPAIRv1(X85W)	Non-conservative	0.0817657	A		SRR10523747	RESCUE+S375C	10th	0.194558	A		SRR10523747	RESCUE+S375C	10th	0.109427	A		SRR10523709	REPAIRv1(N81S)	ClinVar	0.214643	A		SRR10523709	REPAIRv1(N81S)	ClinVar	0.0358613	A
SRR10523710	REPAIRv1(X85W)	syn	0.101651	A		SRR10523710	REPAIRv1(X85W)	syn	0.101651	A		SRR10523710	REPAIRv1(X85W)	Conservative	1.13675	A		SRR10523710	REPAIRv1(X85W)	Conservative	0.0735022	A		SRR10523708	RESCUE+S375N	10th	0.39149	A		SRR10523708	RESCUE+S375N	10th	0.106403	A		SRR10523762	REPAIRv1(N81S)	ClinVar	0.200758	A		SRR10523762	REPAIRv1(N81S)	ClinVar	0.0349212	A
SRR10523711	REPAIRv2	non-syn	0.0619993	A		SRR10523711	REPAIRv2	non-syn	0.0619993	A		SRR10523711	REPAIRv2	Non-conservative	0.143887	A		SRR10523711	REPAIRv2	Non-conservative	0.077899	A		SRR10523716	RESCUE+N473I	10th	0.349838	A		SRR10523716	RESCUE+N473I	10th	0.102015	A		SRR10523740	REPAIRv1(N81S)	ClinVar	0.179883	A		SRR10523740	REPAIRv1(N81S)	ClinVar	0.0402928	A
SRR10523711	REPAIRv2	syn	0.0894885	A		SRR10523711	REPAIRv2	syn	0.0894885	A		SRR10523711	REPAIRv2	Conservative	0.089536	A		SRR10523711	REPAIRv2	Conservative	0.0731838	A		SRR10523703	REPAIRv2	10th	0.0995315	A		SRR10523703	REPAIRv2	10th	0.086131	A		SRR10523720	REPAIRv1(N81S)	ClinVar	0.25783	A		SRR10523720	REPAIRv1(N81S)	ClinVar	0.0379408	A
SRR10523712	REPAIRv1(X85W)	non-syn	0.0681335	A		SRR10523712	REPAIRv1(X85W)	non-syn	0.0681335	A		SRR10523712	REPAIRv1(X85W)	Non-conservative	1.15019	A		SRR10523712	REPAIRv1(X85W)	Non-conservative	0.0781019	A		SRR10523720	REPAIRv1(N81S)	10th	0.287484	A		SRR10523720	REPAIRv1(N81S)	10th	0.0799633	A		SRR10523731	REPAIRv1(N81S)	ClinVar	0.0727201	A		SRR10523731	REPAIRv1(N81S)	ClinVar	0.0459488	A
SRR10523712	REPAIRv1(X85W)	syn	0.100333	A		SRR10523712	REPAIRv1(X85W)	syn	0.100333	A		SRR10523712	REPAIRv1(X85W)	Conservative	1.12927	A		SRR10523712	REPAIRv1(X85W)	Conservative	0.0741829	A		SRR10523731	REPAIRv1(N81S)	10th	0.221739	A		SRR10523731	REPAIRv1(N81S)	10th	0.077649	A		SRR10523749	REPAIRv1(N81S)	ClinVar	0.18479	A		SRR10523749	REPAIRv1(N81S)	ClinVar	0.0351758	A
SRR10523713	RESCUE	non-syn	0.374359	A		SRR10523713	RESCUE	non-syn	0.374359	A		SRR10523713	RESCUE	Non-conservative	0.989462	A		SRR10523713	RESCUE	Non-conservative	0.264222	A		SRR10523765	RESCUE+S375N	10th	0.418788	A		SRR10523765	RESCUE+S375N	10th	0.115117	A		SRR10523702	REPAIRv1(N81S)	ClinVar	0.239799	A		SRR10523702	REPAIRv1(N81S)	ClinVar	0.0329887	A
SRR10523713	RESCUE	syn	0.358093	A		SRR10523713	RESCUE	syn	0.358093	A		SRR10523713	RESCUE	Conservative	0.960855	A		SRR10523713	RESCUE	Conservative	0.0969485	A		SRR10523754	RESCUE+S375C	10th	0.196898	A		SRR10523754	RESCUE+S375C	10th	0.109898	A		SRR10523766	REPAIRv1(N81S)	ClinVar	0.219156	A		SRR10523766	REPAIRv1(N81S)	ClinVar	0.0392794	A
SRR10523714	RESCUE+N473I	non-syn	0.320203	A		SRR10523714	RESCUE+N473I	non-syn	0.320203	A		SRR10523714	RESCUE+N473I	Non-conservative	0.580108	A		SRR10523714	RESCUE+N473I	Non-conservative	0.144737	A		SRR10523715	RESCUE	10th	0.670265	A		SRR10523715	RESCUE	10th	0.147052	A		SRR10523753	REPAIRv1(N81S)	ClinVar	0.204507	A		SRR10523753	REPAIRv1(N81S)	ClinVar	0.0375235	A
SRR10523714	RESCUE+N473I	syn	0.290227	A		SRR10523714	RESCUE+N473I	syn	0.290227	A		SRR10523714	RESCUE+N473I	Conservative	0.567877	A		SRR10523714	RESCUE+N473I	Conservative	0.0809447	A		SRR10523701	RESCUE+S375N	10th	0.414277	A		SRR10523701	RESCUE+S375N	10th	0.110531	A		SRR10523709	REPAIRv1(N81S)	CDS	0.267637	A		SRR10523709	REPAIRv1(N81S)	CDS	0.045353	A
SRR10523715	RESCUE	non-syn	0.368194	A		SRR10523715	RESCUE	non-syn	0.368194	A		SRR10523715	RESCUE	Non-conservative	0.981512	A		SRR10523715	RESCUE	Non-conservative	0.267542	A		SRR10523704	RESCUE	10th	0.672691	A		SRR10523704	RESCUE	10th	0.143832	A		SRR10523762	REPAIRv1(N81S)	CDS	0.2206	A		SRR10523762	REPAIRv1(N81S)	CDS	0.0461442	A
SRR10523715	RESCUE	syn	0.352384	A		SRR10523715	RESCUE	syn	0.352384	A		SRR10523715	RESCUE	Conservative	0.95194	A		SRR10523715	RESCUE	Conservative	0.0917064	A		SRR10523746	RESCUE+S375A	10th	0.11415	A		SRR10523746	RESCUE+S375A	10th	0.108382	A		SRR10523740	REPAIRv1(N81S)	CDS	0.265493	A		SRR10523740	REPAIRv1(N81S)	CDS	0.0457763	A
SRR10523716	RESCUE+N473I	non-syn	0.275394	A		SRR10523716	RESCUE+N473I	non-syn	0.275394	A		SRR10523716	RESCUE+N473I	Non-conservative	0.555455	A		SRR10523716	RESCUE+N473I	Non-conservative	0.140438	A		SRR10523764	RESCUE+S375C	10th	0.179506	A		SRR10523764	RESCUE+S375C	10th	0.106164	A		SRR10523720	REPAIRv1(N81S)	CDS	0.258558	A		SRR10523720	REPAIRv1(N81S)	CDS	0.0466319	A
SRR10523716	RESCUE+N473I	syn	0.260702	A		SRR10523716	RESCUE+N473I	syn	0.260702	A		SRR10523716	RESCUE+N473I	Conservative	0.53975	A		SRR10523716	RESCUE+N473I	Conservative	0.0784373	A		SRR10523760	RESCUE+S375C	10th	0.191996	A		SRR10523760	RESCUE+S375C	10th	0.108769	A		SRR10523731	REPAIRv1(N81S)	CDS	0.192901	A		SRR10523731	REPAIRv1(N81S)	CDS	0.0450888	A
SRR10523717	RESCUE+S375A	non-syn	0.333962	A		SRR10523717	RESCUE+S375A	non-syn	0.333962	A		SRR10523717	RESCUE+S375A	Non-conservative	0.192849	A		SRR10523717	RESCUE+S375A	Non-conservative	0.153689	A		SRR10523724	RESCUE	10th	0.6973	A		SRR10523724	RESCUE	10th	0.149067	A		SRR10523749	REPAIRv1(N81S)	CDS	0.250912	A		SRR10523749	REPAIRv1(N81S)	CDS	0.0457886	A
SRR10523717	RESCUE+S375A	syn	0.299131	A		SRR10523717	RESCUE+S375A	syn	0.299131	A		SRR10523717	RESCUE+S375A	Conservative	0.18221	A		SRR10523717	RESCUE+S375A	Conservative	0.0773777	A		SRR10523717	RESCUE+S375A	10th	0.107476	A		SRR10523717	RESCUE+S375A	10th	0.103695	A		SRR10523702	REPAIRv1(N81S)	CDS	0.290646	A		SRR10523702	REPAIRv1(N81S)	CDS	0.0463081	A
SRR10523718	RESCUE+S375C	non-syn	0.347106	A		SRR10523718	RESCUE+S375C	non-syn	0.347106	A		SRR10523718	RESCUE+S375C	Non-conservative	0.305088	A		SRR10523718	RESCUE+S375C	Non-conservative	0.159838	A		SRR10523749	REPAIRv1(N81S)	10th	0.277902	A		SRR10523749	REPAIRv1(N81S)	10th	0.0786552	A		SRR10523766	REPAIRv1(N81S)	CDS	0.25051	A		SRR10523766	REPAIRv1(N81S)	CDS	0.0450201	A
SRR10523718	RESCUE+S375C	syn	0.303256	A		SRR10523718	RESCUE+S375C	syn	0.303256	A		SRR10523718	RESCUE+S375C	Conservative	0.30464	A		SRR10523718	RESCUE+S375C	Conservative	0.0816496	A		SRR10523733	REPAIRv2	10th	0.0937156	A		SRR10523733	REPAIRv2	10th	0.080114	A		SRR10523753	REPAIRv1(N81S)	CDS	0.266569	A		SRR10523753	REPAIRv1(N81S)	CDS	0.0458309	A
SRR10523719	RESCUE+S375N	non-syn	0.523265	A		SRR10523719	RESCUE+S375N	non-syn	0.523265	A		SRR10523719	RESCUE+S375N	Non-conservative	0.654995	A		SRR10523719	RESCUE+S375N	Non-conservative	0.17405	A		SRR10523761	RESCUE+S375N	10th	0.390308	A		SRR10523761	RESCUE+S375N	10th	0.107733	A		SRR10523742	REPAIRv1(X85W)	Essential genes	0.714083	A		SRR10523742	REPAIRv1(X85W)	Essential genes	0.0461003	A
SRR10523719	RESCUE+S375N	syn	0.489948	A		SRR10523719	RESCUE+S375N	syn	0.489948	A		SRR10523719	RESCUE+S375N	Conservative	0.607871	A		SRR10523719	RESCUE+S375N	Conservative	0.0803874	A		SRR10523741	REPAIRv2	10th	0.0964681	A		SRR10523741	REPAIRv2	10th	0.080679	A		SRR10523742	REPAIRv1(X85W)	Oncogenes	0.601308	A		SRR10523742	REPAIRv1(X85W)	Oncogenes	0.0496598	A
SRR10523720	REPAIRv1(N81S)	non-syn	0.0679537	A		SRR10523720	REPAIRv1(N81S)	non-syn	0.0679537	A		SRR10523720	REPAIRv1(N81S)	Non-conservative	0.420607	A		SRR10523720	REPAIRv1(N81S)	Non-conservative	0.0819479	A		SRR10523743	RESCUE+S375A	10th	0.113138	A		SRR10523743	RESCUE+S375A	10th	0.108609	A		SRR10523723	REPAIRv1(X85W)	Oncogenes	0.726594	A		SRR10523723	REPAIRv1(X85W)	Oncogenes	0.0498724	A
SRR10523720	REPAIRv1(N81S)	syn	0.100853	A		SRR10523720	REPAIRv1(N81S)	syn	0.100853	A		SRR10523720	REPAIRv1(N81S)	Conservative	0.414356	A		SRR10523720	REPAIRv1(N81S)	Conservative	0.0734712	A		SRR10523712	REPAIRv1(X85W)	10th	0.834701	A		SRR10523712	REPAIRv1(X85W)	10th	0.0783948	A		SRR10523734	REPAIRv1(X85W)	Oncogenes	0.52601	A		SRR10523734	REPAIRv1(X85W)	Oncogenes	0.0489849	A
SRR10523721	RESCUE	non-syn	0.388281	A		SRR10523721	RESCUE	non-syn	0.388281	A		SRR10523721	RESCUE	Non-conservative	1.03075	A		SRR10523721	RESCUE	Non-conservative	0.276327	A		SRR10523722	REPAIRv2	10th	0.0970576	A		SRR10523722	REPAIRv2	10th	0.0830065	A		SRR10523756	REPAIRv1(X85W)	Oncogenes	0.685878	A		SRR10523756	REPAIRv1(X85W)	Oncogenes	0.0509737	A
SRR10523721	RESCUE	syn	0.373794	A		SRR10523721	RESCUE	syn	0.373794	A		SRR10523721	RESCUE	Conservative	1.0031	A		SRR10523721	RESCUE	Conservative	0.10048	A		SRR10523728	RESCUE+S375A	10th	0.105818	A		SRR10523728	RESCUE+S375A	10th	0.101326	A		SRR10523742	REPAIRv1(X85W)	Oncogenes	0.601308	A		SRR10523742	REPAIRv1(X85W)	Oncogenes	0.0496598	A
SRR10523722	REPAIRv2	non-syn	0.0636025	A		SRR10523722	REPAIRv2	non-syn	0.0636025	A		SRR10523722	REPAIRv2	Non-conservative	0.139727	A		SRR10523722	REPAIRv2	Non-conservative	0.0798779	A		SRR10523713	RESCUE	10th	0.662129	A		SRR10523713	RESCUE	10th	0.145257	A		SRR10523723	REPAIRv1(X85W)	Oncogenes	0.726594	A		SRR10523723	REPAIRv1(X85W)	Oncogenes	0.0498724	A
SRR10523722	REPAIRv2	syn	0.0907289	A		SRR10523722	REPAIRv2	syn	0.0907289	A		SRR10523722	REPAIRv2	Conservative	0.088826	A		SRR10523722	REPAIRv2	Conservative	0.0707204	A		SRR10523721	RESCUE	10th	0.697857	A		SRR10523721	RESCUE	10th	0.152038	A		SRR10523734	REPAIRv1(X85W)	Oncogenes	0.52601	A		SRR10523734	REPAIRv1(X85W)	Oncogenes	0.0489849	A
SRR10523723	REPAIRv1(X85W)	non-syn	0.0666173	A		SRR10523723	REPAIRv1(X85W)	non-syn	0.0666173	A		SRR10523723	REPAIRv1(X85W)	Non-conservative	1.1893	A		SRR10523723	REPAIRv1(X85W)	Non-conservative	0.0777881	A		SRR10523759	RESCUE+S375A	10th	0.110584	A		SRR10523759	RESCUE+S375A	10th	0.101994	A		SRR10523756	REPAIRv1(X85W)	Oncogenes	0.685878	A		SRR10523756	REPAIRv1(X85W)	Oncogenes	0.0509737	A
SRR10523723	REPAIRv1(X85W)	syn	0.0978859	A		SRR10523723	REPAIRv1(X85W)	syn	0.0978859	A		SRR10523723	REPAIRv1(X85W)	Conservative	1.17096	A		SRR10523723	REPAIRv1(X85W)	Conservative	0.0680932	A		SRR10523727	RESCUE+N473I	10th	0.304008	A		SRR10523727	RESCUE+N473I	10th	0.100249	A		SRR10523712	REPAIRv1(X85W)	Oncogenes	0.679545	A		SRR10523712	REPAIRv1(X85W)	Oncogenes	0.050685	A
SRR10523724	RESCUE	non-syn	0.398479	A		SRR10523724	RESCUE	non-syn	0.398479	A		SRR10523724	RESCUE	Non-conservative	1.01981	A		SRR10523724	RESCUE	Non-conservative	0.272073	A		SRR10523725	RESCUE+N473I	10th	0.36162	A		SRR10523725	RESCUE+N473I	10th	0.107262	A		SRR10523712	REPAIRv1(X85W)	Oncogenes	0.679545	A		SRR10523712	REPAIRv1(X85W)	Oncogenes	0.050685	A
SRR10523724	RESCUE	syn	0.375792	A		SRR10523724	RESCUE	syn	0.375792	A		SRR10523724	RESCUE	Conservative	0.99528	A		SRR10523724	RESCUE	Conservative	0.0982816	A		SRR10523737	RESCUE+S375A	10th	0.109113	A		SRR10523737	RESCUE+S375A	10th	0.103957	A		SRR10523710	REPAIRv1(X85W)	Oncogenes	0.641437	A		SRR10523710	REPAIRv1(X85W)	Oncogenes	0.0468499	A
SRR10523725	RESCUE+N473I	non-syn	0.319753	A		SRR10523725	RESCUE+N473I	non-syn	0.319753	A		SRR10523725	RESCUE+N473I	Non-conservative	0.583376	A		SRR10523725	RESCUE+N473I	Non-conservative	0.145152	A		SRR10523758	RESCUE+N473I	10th	0.356435	A		SRR10523758	RESCUE+N473I	10th	0.103692	A		SRR10523710	REPAIRv1(X85W)	Oncogenes	0.641437	A		SRR10523710	REPAIRv1(X85W)	Oncogenes	0.0468499	A
SRR10523725	RESCUE+N473I	syn	0.291088	A		SRR10523725	RESCUE+N473I	syn	0.291088	A		SRR10523725	RESCUE+N473I	Conservative	0.56951	A		SRR10523725	RESCUE+N473I	Conservative	0.0825658	A		SRR10523718	RESCUE+S375C	10th	0.183177	A		SRR10523718	RESCUE+S375C	10th	0.108606	A		SRR10523742	REPAIRv1(X85W)	ClinVar	0.532162	A		SRR10523742	REPAIRv1(X85W)	ClinVar	0.0605127	A
SRR10523726	RESCUE	non-syn	0.31381	A		SRR10523726	RESCUE	non-syn	0.31381	A		SRR10523726	RESCUE	Non-conservative	0.83302	A		SRR10523726	RESCUE	Non-conservative	0.233984	A		SRR10523763	RESCUE+S375A	10th	0.110738	A		SRR10523763	RESCUE+S375A	10th	0.107017	A		SRR10523723	REPAIRv1(X85W)	ClinVar	0.860876	A		SRR10523723	REPAIRv1(X85W)	ClinVar	0.0433014	A
SRR10523726	RESCUE	syn	0.313992	A		SRR10523726	RESCUE	syn	0.313992	A		SRR10523726	RESCUE	Conservative	0.816446	A		SRR10523726	RESCUE	Conservative	0.0912456	A		SRR10523736	RESCUE+N473I	10th	0.308708	A		SRR10523736	RESCUE+N473I	10th	0.0988716	A		SRR10523734	REPAIRv1(X85W)	ClinVar	0.606855	A		SRR10523734	REPAIRv1(X85W)	ClinVar	0.0517415	A
SRR10523727	RESCUE+N473I	non-syn	0.247787	A		SRR10523727	RESCUE+N473I	non-syn	0.247787	A		SRR10523727	RESCUE+N473I	Non-conservative	0.479866	A		SRR10523727	RESCUE+N473I	Non-conservative	0.133951	A		SRR10523702	REPAIRv1(N81S)	10th	0.322348	A		SRR10523702	REPAIRv1(N81S)	10th	0.0817941	A		SRR10523756	REPAIRv1(X85W)	ClinVar	0.726797	A		SRR10523756	REPAIRv1(X85W)	ClinVar	0.0460208	A
SRR10523727	RESCUE+N473I	syn	0.241635	A		SRR10523727	RESCUE+N473I	syn	0.241635	A		SRR10523727	RESCUE+N473I	Conservative	0.46658	A		SRR10523727	RESCUE+N473I	Conservative	0.0802826	A		SRR10523744	RESCUE	10th	0.724391	A		SRR10523744	RESCUE	10th	0.155525	A		SRR10523712	REPAIRv1(X85W)	ClinVar	0.700926	A		SRR10523712	REPAIRv1(X85W)	ClinVar	0.0328202	A
SRR10523728	RESCUE+S375A	non-syn	0.291996	A		SRR10523728	RESCUE+S375A	non-syn	0.291996	A		SRR10523728	RESCUE+S375A	Non-conservative	0.169579	A		SRR10523728	RESCUE+S375A	Non-conservative	0.142341	A		SRR10523745	RESCUE+N473I	10th	0.398683	A		SRR10523745	RESCUE+N473I	10th	0.111555	A		SRR10523710	REPAIRv1(X85W)	ClinVar	0.718586	A		SRR10523710	REPAIRv1(X85W)	ClinVar	0.0650505	A
SRR10523728	RESCUE+S375A	syn	0.27094	A		SRR10523728	RESCUE+S375A	syn	0.27094	A		SRR10523728	RESCUE+S375A	Conservative	0.160852	A		SRR10523728	RESCUE+S375A	Conservative	0.0792693	A		SRR10523766	REPAIRv1(N81S)	10th	0.283902	A		SRR10523766	REPAIRv1(N81S)	10th	0.0811672	A		SRR10523742	REPAIRv1(X85W)	CDS	0.739798	A		SRR10523742	REPAIRv1(X85W)	CDS	0.0455633	A
SRR10523729	RESCUE+S375C	non-syn	0.46202	A		SRR10523729	RESCUE+S375C	non-syn	0.46202	A		SRR10523729	RESCUE+S375C	Non-conservative	0.259441	A		SRR10523729	RESCUE+S375C	Non-conservative	0.147342	A		SRR10523738	RESCUE+S375C	10th	0.17629	A		SRR10523738	RESCUE+S375C	10th	0.104227	A		SRR10523723	REPAIRv1(X85W)	CDS	0.865147	A		SRR10523723	REPAIRv1(X85W)	CDS	0.0457074	A
SRR10523729	RESCUE+S375C	syn	0.435525	A		SRR10523729	RESCUE+S375C	syn	0.435525	A		SRR10523729	RESCUE+S375C	Conservative	0.257134	A		SRR10523729	RESCUE+S375C	Conservative	0.079122	A		SRR10523730	RESCUE+S375N	10th	0.360144	A		SRR10523730	RESCUE+S375N	10th	0.106897	A		SRR10523734	REPAIRv1(X85W)	CDS	0.645621	A		SRR10523734	REPAIRv1(X85W)	CDS	0.0456099	A
SRR10523730	RESCUE+S375N	non-syn	0.286578	A		SRR10523730	RESCUE+S375N	non-syn	0.286578	A		SRR10523730	RESCUE+S375N	Non-conservative	0.570692	A		SRR10523730	RESCUE+S375N	Non-conservative	0.160363	A		SRR10523710	REPAIRv1(X85W)	10th	0.824174	A		SRR10523710	REPAIRv1(X85W)	10th	0.08164	A		SRR10523756	REPAIRv1(X85W)	CDS	0.829654	A		SRR10523756	REPAIRv1(X85W)	CDS	0.0461817	A
SRR10523730	RESCUE+S375N	syn	0.270337	A		SRR10523730	RESCUE+S375N	syn	0.270337	A		SRR10523730	RESCUE+S375N	Conservative	0.533628	A		SRR10523730	RESCUE+S375N	Conservative	0.0781112	A		SRR10523706	RESCUE+S375A	10th	0.106916	A		SRR10523706	RESCUE+S375A	10th	0.0998679	A		SRR10523712	REPAIRv1(X85W)	CDS	0.809678	A		SRR10523712	REPAIRv1(X85W)	CDS	0.046006	A
SRR10523731	REPAIRv1(N81S)	non-syn	0.0698918	A		SRR10523731	REPAIRv1(N81S)	non-syn	0.0698918	A		SRR10523731	REPAIRv1(N81S)	Non-conservative	0.319544	A		SRR10523731	REPAIRv1(N81S)	Non-conservative	0.0786866	A		SRR10523753	REPAIRv1(N81S)	10th	0.296693	A		SRR10523753	REPAIRv1(N81S)	10th	0.0805355	A		SRR10523710	REPAIRv1(X85W)	CDS	0.793304	A		SRR10523710	REPAIRv1(X85W)	CDS	0.0460312	A
SRR10523731	REPAIRv1(N81S)	syn	0.102939	A		SRR10523731	REPAIRv1(N81S)	syn	0.102939	A		SRR10523731	REPAIRv1(N81S)	Conservative	0.314204	A		SRR10523731	REPAIRv1(N81S)	Conservative	0.070826	A		SRR10523719	RESCUE+S375N	10th	0.410213	A		SRR10523719	RESCUE+S375N	10th	0.110092	A		SRR10523711	REPAIRv2	Oncogenes	0.0502276	A		SRR10523711	REPAIRv2	Oncogenes	0.047462	A
SRR10523732	RESCUE+N473I	non-syn	0.306285	A		SRR10523732	RESCUE+N473I	non-syn	0.306285	A		SRR10523732	RESCUE+N473I	Non-conservative	0.620397	A		SRR10523732	RESCUE+N473I	Non-conservative	0.154297	A		SRR10523755	REPAIRv2	10th	0.0977485	A		SRR10523755	REPAIRv2	10th	0.0828021	A		SRR10523703	REPAIRv2	Oncogenes	0.0481327	A		SRR10523703	REPAIRv2	Oncogenes	0.0463914	A
SRR10523732	RESCUE+N473I	syn	0.285484	A		SRR10523732	RESCUE+N473I	syn	0.285484	A		SRR10523732	RESCUE+N473I	Conservative	0.607813	A		SRR10523732	RESCUE+N473I	Conservative	0.0808192	A		SRR10523752	RESCUE+S375N	10th	0.386111	A		SRR10523752	RESCUE+S375N	10th	0.108306	A		SRR10523711	REPAIRv2	Oncogenes	0.0502276	A		SRR10523711	REPAIRv2	Oncogenes	0.047462	A
SRR10523733	REPAIRv2	non-syn	0.0643815	A		SRR10523733	REPAIRv2	non-syn	0.0643815	A		SRR10523733	REPAIRv2	Non-conservative	0.124172	A		SRR10523733	REPAIRv2	Non-conservative	0.0765471	A		SRR10523748	RESCUE+S375N	10th	0.423728	A		SRR10523748	RESCUE+S375N	10th	0.114347	A		SRR10523733	REPAIRv2	Oncogenes	0.0469793	A		SRR10523733	REPAIRv2	Oncogenes	0.0470113	A
SRR10523733	REPAIRv2	syn	0.0933567	A		SRR10523733	REPAIRv2	syn	0.0933567	A		SRR10523733	REPAIRv2	Conservative	0.0805477	A		SRR10523733	REPAIRv2	Conservative	0.0707399	A		SRR10523751	RESCUE+S375C	10th	0.179762	A		SRR10523751	RESCUE+S375C	10th	0.103723	A		SRR10523741	REPAIRv2	Oncogenes	0.050219	A		SRR10523741	REPAIRv2	Oncogenes	0.049167	A
SRR10523734	REPAIRv1(X85W)	non-syn	0.069651	A		SRR10523734	REPAIRv1(X85W)	non-syn	0.069651	A		SRR10523734	REPAIRv1(X85W)	Non-conservative	0.938414	A		SRR10523734	REPAIRv1(X85W)	Non-conservative	0.0790171	A		SRR10523742	REPAIRv1(X85W)	4th	0.764657	A		SRR10523742	REPAIRv1(X85W)	4th	0.0956087	A		SRR10523703	REPAIRv2	Oncogenes	0.0481327	A		SRR10523703	REPAIRv2	Oncogenes	0.0463914	A
SRR10523734	REPAIRv1(X85W)	syn	0.101126	A		SRR10523734	REPAIRv1(X85W)	syn	0.101126	A		SRR10523734	REPAIRv1(X85W)	Conservative	0.927388	A		SRR10523734	REPAIRv1(X85W)	Conservative	0.0699883	A		SRR10523735	RESCUE	4th	0.624786	A		SRR10523735	RESCUE	4th	0.153564	A		SRR10523722	REPAIRv2	Oncogenes	0.0494958	A		SRR10523722	REPAIRv2	Oncogenes	0.0474685	A
SRR10523735	RESCUE	non-syn	0.354192	A		SRR10523735	RESCUE	non-syn	0.354192	A		SRR10523735	RESCUE	Non-conservative	0.94197	A		SRR10523735	RESCUE	Non-conservative	0.254631	A		SRR10523750	RESCUE+S375A	4th	0.119134	A		SRR10523750	RESCUE+S375A	4th	0.117725	A		SRR10523741	REPAIRv2	Oncogenes	0.050219	A		SRR10523741	REPAIRv2	Oncogenes	0.049167	A
SRR10523735	RESCUE	syn	0.344113	A		SRR10523735	RESCUE	syn	0.344113	A		SRR10523735	RESCUE	Conservative	0.923146	A		SRR10523735	RESCUE	Conservative	0.0928968	A		SRR10523707	RESCUE+S375C	4th	0.192305	A		SRR10523707	RESCUE+S375C	4th	0.119898	A		SRR10523733	REPAIRv2	Oncogenes	0.0469793	A		SRR10523733	REPAIRv2	Oncogenes	0.0470113	A
SRR10523736	RESCUE+N473I	non-syn	0.245433	A		SRR10523736	RESCUE+N473I	non-syn	0.245433	A		SRR10523736	RESCUE+N473I	Non-conservative	0.474641	A		SRR10523736	RESCUE+N473I	Non-conservative	0.132747	A		SRR10523739	RESCUE+S375N	4th	0.395428	A		SRR10523739	RESCUE+S375N	4th	0.12252	A		SRR10523722	REPAIRv2	Oncogenes	0.0494958	A		SRR10523722	REPAIRv2	Oncogenes	0.0474685	A
SRR10523736	RESCUE+N473I	syn	0.239583	A		SRR10523736	RESCUE+N473I	syn	0.239583	A		SRR10523736	RESCUE+N473I	Conservative	0.46729	A		SRR10523736	RESCUE+N473I	Conservative	0.0761567	A		SRR10523729	RESCUE+S375C	4th	0.173882	A		SRR10523729	RESCUE+S375C	4th	0.116056	A		SRR10523755	REPAIRv2	Oncogenes	0.0504084	A		SRR10523755	REPAIRv2	Oncogenes	0.0504946	A
SRR10523737	RESCUE+S375A	non-syn	0.361919	A		SRR10523737	RESCUE+S375A	non-syn	0.361919	A		SRR10523737	RESCUE+S375A	Non-conservative	0.206909	A		SRR10523737	RESCUE+S375A	Non-conservative	0.152906	A		SRR10523726	RESCUE	4th	0.544151	A		SRR10523726	RESCUE	4th	0.144513	A		SRR10523755	REPAIRv2	Oncogenes	0.0504084	A		SRR10523755	REPAIRv2	Oncogenes	0.0504946	A
SRR10523737	RESCUE+S375A	syn	0.32035	A		SRR10523737	RESCUE+S375A	syn	0.32035	A		SRR10523737	RESCUE+S375A	Conservative	0.19735	A		SRR10523737	RESCUE+S375A	Conservative	0.0785102	A		SRR10523709	REPAIRv1(N81S)	4th	0.305503	A		SRR10523709	REPAIRv1(N81S)	4th	0.090363	A		SRR10523711	REPAIRv2	ClinVar	0.0701399	A		SRR10523711	REPAIRv2	ClinVar	0.060044	A
SRR10523738	RESCUE+S375C	non-syn	0.342066	A		SRR10523738	RESCUE+S375C	non-syn	0.342066	A		SRR10523738	RESCUE+S375C	Non-conservative	0.286615	A		SRR10523738	RESCUE+S375C	Non-conservative	0.153197	A		SRR10523732	RESCUE+N473I	4th	0.395882	A		SRR10523732	RESCUE+N473I	4th	0.121416	A		SRR10523703	REPAIRv2	ClinVar	0.0520671	A		SRR10523703	REPAIRv2	ClinVar	0.0477162	A
SRR10523738	RESCUE+S375C	syn	0.300324	A		SRR10523738	RESCUE+S375C	syn	0.300324	A		SRR10523738	RESCUE+S375C	Conservative	0.290431	A		SRR10523738	RESCUE+S375C	Conservative	0.081231	A		SRR10523723	REPAIRv1(X85W)	4th	0.885215	A		SRR10523723	REPAIRv1(X85W)	4th	0.0917755	A		SRR10523733	REPAIRv2	ClinVar	0.0422505	A		SRR10523733	REPAIRv2	ClinVar	0.0407624	A
SRR10523739	RESCUE+S375N	non-syn	0.51034	A		SRR10523739	RESCUE+S375N	non-syn	0.51034	A		SRR10523739	RESCUE+S375N	Non-conservative	0.622224	A		SRR10523739	RESCUE+S375N	Non-conservative	0.16711	A		SRR10523714	RESCUE+N473I	4th	0.364033	A		SRR10523714	RESCUE+N473I	4th	0.11826	A		SRR10523741	REPAIRv2	ClinVar	0.0329815	A		SRR10523741	REPAIRv2	ClinVar	0.0493298	A
SRR10523739	RESCUE+S375N	syn	0.48268	A		SRR10523739	RESCUE+S375N	syn	0.48268	A		SRR10523739	RESCUE+S375N	Conservative	0.581436	A		SRR10523739	RESCUE+S375N	Conservative	0.0795374	A		SRR10523734	REPAIRv1(X85W)	4th	0.655658	A		SRR10523734	REPAIRv1(X85W)	4th	0.0935772	A		SRR10523722	REPAIRv2	ClinVar	0.0353982	A		SRR10523722	REPAIRv2	ClinVar	0.0582363	A
SRR10523740	REPAIRv1(N81S)	non-syn	0.0680027	A		SRR10523740	REPAIRv1(N81S)	non-syn	0.0680027	A		SRR10523740	REPAIRv1(N81S)	Non-conservative	0.42923	A		SRR10523740	REPAIRv1(N81S)	Non-conservative	0.0794243	A		SRR10523762	REPAIRv1(N81S)	4th	0.26299	A		SRR10523762	REPAIRv1(N81S)	4th	0.0984614	A		SRR10523755	REPAIRv2	ClinVar	0.0277316	A		SRR10523755	REPAIRv2	ClinVar	0.0468245	A
SRR10523740	REPAIRv1(N81S)	syn	0.101676	A		SRR10523740	REPAIRv1(N81S)	syn	0.101676	A		SRR10523740	REPAIRv1(N81S)	Conservative	0.421706	A		SRR10523740	REPAIRv1(N81S)	Conservative	0.0717404	A		SRR10523740	REPAIRv1(N81S)	4th	0.303122	A		SRR10523740	REPAIRv1(N81S)	4th	0.100648	A		SRR10523711	REPAIRv2	CDS	0.0662786	A		SRR10523711	REPAIRv2	CDS	0.0463141	A
SRR10523741	REPAIRv2	non-syn	0.0640892	A		SRR10523741	REPAIRv2	non-syn	0.0640892	A		SRR10523741	REPAIRv2	Non-conservative	0.139264	A		SRR10523741	REPAIRv2	Non-conservative	0.0780022	A		SRR10523756	REPAIRv1(X85W)	4th	0.847389	A		SRR10523756	REPAIRv1(X85W)	4th	0.0930852	A		SRR10523703	REPAIRv2	CDS	0.065528	A		SRR10523703	REPAIRv2	CDS	0.0450951	A
SRR10523741	REPAIRv2	syn	0.0915909	A		SRR10523741	REPAIRv2	syn	0.0915909	A		SRR10523741	REPAIRv2	Conservative	0.0869751	A		SRR10523741	REPAIRv2	Conservative	0.0711219	A		SRR10523711	REPAIRv2	4th	0.107864	A		SRR10523711	REPAIRv2	4th	0.0972799	A		SRR10523733	REPAIRv2	CDS	0.0576162	A		SRR10523733	REPAIRv2	CDS	0.0450674	A
SRR10523742	REPAIRv1(X85W)	non-syn	0.070722	A		SRR10523742	REPAIRv1(X85W)	non-syn	0.070722	A		SRR10523742	REPAIRv1(X85W)	Non-conservative	1.06586	A		SRR10523742	REPAIRv1(X85W)	Non-conservative	0.0808325	A		SRR10523757	RESCUE	4th	0.674984	A		SRR10523757	RESCUE	4th	0.155846	A		SRR10523741	REPAIRv2	CDS	0.0643178	A		SRR10523741	REPAIRv2	CDS	0.0454467	A
SRR10523742	REPAIRv1(X85W)	syn	0.102041	A		SRR10523742	REPAIRv1(X85W)	syn	0.102041	A		SRR10523742	REPAIRv1(X85W)	Conservative	1.05348	A		SRR10523742	REPAIRv1(X85W)	Conservative	0.0711141	A		SRR10523708	RESCUE+S375N	4th	0.399877	A		SRR10523708	RESCUE+S375N	4th	0.122734	A		SRR10523722	REPAIRv2	CDS	0.0641022	A		SRR10523722	REPAIRv2	CDS	0.0460453	A
SRR10523743	RESCUE+S375A	non-syn	0.349253	A		SRR10523743	RESCUE+S375A	non-syn	0.349253	A		SRR10523743	RESCUE+S375A	Non-conservative	0.195887	A		SRR10523743	RESCUE+S375A	Non-conservative	0.158797	A		SRR10523705	RESCUE+N473I	4th	0.349761	A		SRR10523705	RESCUE+N473I	4th	0.117618	A		SRR10523755	REPAIRv2	CDS	0.0655481	A		SRR10523755	REPAIRv2	CDS	0.0456264	A
SRR10523743	RESCUE+S375A	syn	0.31458	A		SRR10523743	RESCUE+S375A	syn	0.31458	A		SRR10523743	RESCUE+S375A	Conservative	0.190722	A		SRR10523743	RESCUE+S375A	Conservative	0.0821909	A		SRR10523747	RESCUE+S375C	4th	0.198861	A		SRR10523747	RESCUE+S375C	4th	0.119639	A		SRR10523735	RESCUE	Essential genes	0.568601	A		SRR10523735	RESCUE	Essential genes	0.114621	A
SRR10523744	RESCUE	non-syn	0.358802	A		SRR10523744	RESCUE	non-syn	0.358802	A		SRR10523744	RESCUE	Non-conservative	1.05171	A		SRR10523744	RESCUE	Non-conservative	0.280764	A		SRR10523720	REPAIRv1(N81S)	4th	0.301085	A		SRR10523720	REPAIRv1(N81S)	4th	0.100179	A		SRR10523735	RESCUE	Oncogenes	0.487484	A		SRR10523735	RESCUE	Oncogenes	0.108069	A
SRR10523744	RESCUE	syn	0.354301	A		SRR10523744	RESCUE	syn	0.354301	A		SRR10523744	RESCUE	Conservative	1.03113	A		SRR10523744	RESCUE	Conservative	0.100923	A		SRR10523703	REPAIRv2	4th	0.111773	A		SRR10523703	REPAIRv2	4th	0.0976475	A		SRR10523726	RESCUE	Oncogenes	0.435172	A		SRR10523726	RESCUE	Oncogenes	0.098273	A
SRR10523745	RESCUE+N473I	non-syn	0.282619	A		SRR10523745	RESCUE+N473I	non-syn	0.282619	A		SRR10523745	RESCUE+N473I	Non-conservative	0.618081	A		SRR10523745	RESCUE+N473I	Non-conservative	0.155668	A		SRR10523716	RESCUE+N473I	4th	0.352462	A		SRR10523716	RESCUE+N473I	4th	0.120501	A		SRR10523757	RESCUE	Oncogenes	0.529925	A		SRR10523757	RESCUE	Oncogenes	0.108721	A
SRR10523745	RESCUE+N473I	syn	0.271593	A		SRR10523745	RESCUE+N473I	syn	0.271593	A		SRR10523745	RESCUE+N473I	Conservative	0.600753	A		SRR10523745	RESCUE+N473I	Conservative	0.077662	A		SRR10523731	REPAIRv1(N81S)	4th	0.228227	A		SRR10523731	REPAIRv1(N81S)	4th	0.0923262	A		SRR10523735	RESCUE	Oncogenes	0.487484	A		SRR10523735	RESCUE	Oncogenes	0.108069	A
SRR10523746	RESCUE+S375A	non-syn	0.317541	A		SRR10523746	RESCUE+S375A	non-syn	0.317541	A		SRR10523746	RESCUE+S375A	Non-conservative	0.187828	A		SRR10523746	RESCUE+S375A	Non-conservative	0.157494	A		SRR10523765	RESCUE+S375N	4th	0.425412	A		SRR10523765	RESCUE+S375N	4th	0.119204	A		SRR10523726	RESCUE	Oncogenes	0.435172	A		SRR10523726	RESCUE	Oncogenes	0.098273	A
SRR10523746	RESCUE+S375A	syn	0.294753	A		SRR10523746	RESCUE+S375A	syn	0.294753	A		SRR10523746	RESCUE+S375A	Conservative	0.17889	A		SRR10523746	RESCUE+S375A	Conservative	0.0797629	A		SRR10523754	RESCUE+S375C	4th	0.199447	A		SRR10523754	RESCUE+S375C	4th	0.122424	A		SRR10523715	RESCUE	Oncogenes	0.518365	A		SRR10523715	RESCUE	Oncogenes	0.10766	A
SRR10523747	RESCUE+S375C	non-syn	0.320569	A		SRR10523747	RESCUE+S375C	non-syn	0.320569	A		SRR10523747	RESCUE+S375C	Non-conservative	0.304915	A		SRR10523747	RESCUE+S375C	Non-conservative	0.162651	A		SRR10523715	RESCUE	4th	0.657823	A		SRR10523715	RESCUE	4th	0.155309	A		SRR10523704	RESCUE	Oncogenes	0.521342	A		SRR10523704	RESCUE	Oncogenes	0.111768	A
SRR10523747	RESCUE+S375C	syn	0.291559	A		SRR10523747	RESCUE+S375C	syn	0.291559	A		SRR10523747	RESCUE+S375C	Conservative	0.30453	A		SRR10523747	RESCUE+S375C	Conservative	0.0800532	A		SRR10523701	RESCUE+S375N	4th	0.412792	A		SRR10523701	RESCUE+S375N	4th	0.121278	A		SRR10523724	RESCUE	Oncogenes	0.533019	A		SRR10523724	RESCUE	Oncogenes	0.114052	A
SRR10523748	RESCUE+S375N	non-syn	0.326708	A		SRR10523748	RESCUE+S375N	non-syn	0.326708	A		SRR10523748	RESCUE+S375N	Non-conservative	0.667429	A		SRR10523748	RESCUE+S375N	Non-conservative	0.177141	A		SRR10523746	RESCUE+S375A	4th	0.122329	A		SRR10523746	RESCUE+S375A	4th	0.118087	A		SRR10523757	RESCUE	Oncogenes	0.529925	A		SRR10523757	RESCUE	Oncogenes	0.108721	A
SRR10523748	RESCUE+S375N	syn	0.30429	A		SRR10523748	RESCUE+S375N	syn	0.30429	A		SRR10523748	RESCUE+S375N	Conservative	0.62891	A		SRR10523748	RESCUE+S375N	Conservative	0.0800135	A		SRR10523704	RESCUE	4th	0.657516	A		SRR10523704	RESCUE	4th	0.149173	A		SRR10523715	RESCUE	Oncogenes	0.518365	A		SRR10523715	RESCUE	Oncogenes	0.10766	A
SRR10523749	REPAIRv1(N81S)	non-syn	0.234551	A		SRR10523749	REPAIRv1(N81S)	non-syn	0.234551	A		SRR10523749	REPAIRv1(N81S)	Non-conservative	0.401569	A		SRR10523749	REPAIRv1(N81S)	Non-conservative	0.0797405	A		SRR10523724	RESCUE	4th	0.678087	A		SRR10523724	RESCUE	4th	0.158242	A		SRR10523713	RESCUE	Oncogenes	0.506533	A		SRR10523713	RESCUE	Oncogenes	0.105332	A
SRR10523749	REPAIRv1(N81S)	syn	0.258674	A		SRR10523749	REPAIRv1(N81S)	syn	0.258674	A		SRR10523749	REPAIRv1(N81S)	Conservative	0.396741	A		SRR10523749	REPAIRv1(N81S)	Conservative	0.0708561	A		SRR10523764	RESCUE+S375C	4th	0.189189	A		SRR10523764	RESCUE+S375C	4th	0.12022	A		SRR10523721	RESCUE	Oncogenes	0.531592	A		SRR10523721	RESCUE	Oncogenes	0.10956	A
SRR10523750	RESCUE+S375A	non-syn	0.320551	A		SRR10523750	RESCUE+S375A	non-syn	0.320551	A		SRR10523750	RESCUE+S375A	Non-conservative	0.189662	A		SRR10523750	RESCUE+S375A	Non-conservative	0.147103	A		SRR10523760	RESCUE+S375C	4th	0.198915	A		SRR10523760	RESCUE+S375C	4th	0.123155	A		SRR10523724	RESCUE	Oncogenes	0.533019	A		SRR10523724	RESCUE	Oncogenes	0.114052	A
SRR10523750	RESCUE+S375A	syn	0.289762	A		SRR10523750	RESCUE+S375A	syn	0.289762	A		SRR10523750	RESCUE+S375A	Conservative	0.179561	A		SRR10523750	RESCUE+S375A	Conservative	0.0810454	A		SRR10523749	REPAIRv1(N81S)	4th	0.296819	A		SRR10523749	REPAIRv1(N81S)	4th	0.0933918	A		SRR10523704	RESCUE	Oncogenes	0.521342	A		SRR10523704	RESCUE	Oncogenes	0.111768	A
SRR10523751	RESCUE+S375C	non-syn	0.333989	A		SRR10523751	RESCUE+S375C	non-syn	0.333989	A		SRR10523751	RESCUE+S375C	Non-conservative	0.297287	A		SRR10523751	RESCUE+S375C	Non-conservative	0.155145	A		SRR10523717	RESCUE+S375A	4th	0.122892	A		SRR10523717	RESCUE+S375A	4th	0.121041	A		SRR10523744	RESCUE	Oncogenes	0.551544	A		SRR10523744	RESCUE	Oncogenes	0.111689	A
SRR10523751	RESCUE+S375C	syn	0.294094	A		SRR10523751	RESCUE+S375C	syn	0.294094	A		SRR10523751	RESCUE+S375C	Conservative	0.296918	A		SRR10523751	RESCUE+S375C	Conservative	0.0798284	A		SRR10523761	RESCUE+S375N	4th	0.388866	A		SRR10523761	RESCUE+S375N	4th	0.120197	A		SRR10523713	RESCUE	Oncogenes	0.506533	A		SRR10523713	RESCUE	Oncogenes	0.105332	A
SRR10523752	RESCUE+S375N	non-syn	0.313595	A		SRR10523752	RESCUE+S375N	non-syn	0.313595	A		SRR10523752	RESCUE+S375N	Non-conservative	0.60963	A		SRR10523752	RESCUE+S375N	Non-conservative	0.167417	A		SRR10523733	REPAIRv2	4th	0.107366	A		SRR10523733	REPAIRv2	4th	0.097137	A		SRR10523721	RESCUE	Oncogenes	0.531592	A		SRR10523721	RESCUE	Oncogenes	0.10956	A
SRR10523752	RESCUE+S375N	syn	0.291363	A		SRR10523752	RESCUE+S375N	syn	0.291363	A		SRR10523752	RESCUE+S375N	Conservative	0.579114	A		SRR10523752	RESCUE+S375N	Conservative	0.0808543	A		SRR10523741	REPAIRv2	4th	0.106881	A		SRR10523741	REPAIRv2	4th	0.0963931	A		SRR10523744	RESCUE	Oncogenes	0.551544	A		SRR10523744	RESCUE	Oncogenes	0.111689	A
SRR10523753	REPAIRv1(N81S)	non-syn	0.0687073	A		SRR10523753	REPAIRv1(N81S)	non-syn	0.0687073	A		SRR10523753	REPAIRv1(N81S)	Non-conservative	0.43267	A		SRR10523753	REPAIRv1(N81S)	Non-conservative	0.0804991	A		SRR10523712	REPAIRv1(X85W)	4th	0.829573	A		SRR10523712	REPAIRv1(X85W)	4th	0.0956982	A		SRR10523735	RESCUE	ClinVar	0.510856	A		SRR10523735	RESCUE	ClinVar	0.122198	A
SRR10523753	REPAIRv1(N81S)	syn	0.10014	A		SRR10523753	REPAIRv1(N81S)	syn	0.10014	A		SRR10523753	REPAIRv1(N81S)	Conservative	0.42233	A		SRR10523753	REPAIRv1(N81S)	Conservative	0.0732653	A		SRR10523743	RESCUE+S375A	4th	0.123024	A		SRR10523743	RESCUE+S375A	4th	0.122047	A		SRR10523726	RESCUE	ClinVar	0.502346	A		SRR10523726	RESCUE	ClinVar	0.144986	A
SRR10523754	RESCUE+S375C	non-syn	0.354119	A		SRR10523754	RESCUE+S375C	non-syn	0.354119	A		SRR10523754	RESCUE+S375C	Non-conservative	0.322514	A		SRR10523754	RESCUE+S375C	Non-conservative	0.166627	A		SRR10523722	REPAIRv2	4th	0.106425	A		SRR10523722	REPAIRv2	4th	0.0975981	A		SRR10523757	RESCUE	ClinVar	0.461894	A		SRR10523757	RESCUE	ClinVar	0.143125	A
SRR10523754	RESCUE+S375C	syn	0.311257	A		SRR10523754	RESCUE+S375C	syn	0.311257	A		SRR10523754	RESCUE+S375C	Conservative	0.3238	A		SRR10523754	RESCUE+S375C	Conservative	0.0788046	A		SRR10523728	RESCUE+S375A	4th	0.11537	A		SRR10523728	RESCUE+S375A	4th	0.118134	A		SRR10523715	RESCUE	ClinVar	0.487247	A		SRR10523715	RESCUE	ClinVar	0.114917	A
SRR10523755	REPAIRv2	non-syn	0.0628055	A		SRR10523755	REPAIRv2	non-syn	0.0628055	A		SRR10523755	REPAIRv2	Non-conservative	0.144382	A		SRR10523755	REPAIRv2	Non-conservative	0.0781362	A		SRR10523713	RESCUE	4th	0.648445	A		SRR10523713	RESCUE	4th	0.160217	A		SRR10523704	RESCUE	ClinVar	0.549205	A		SRR10523704	RESCUE	ClinVar	0.167167	A
SRR10523755	REPAIRv2	syn	0.0911345	A		SRR10523755	REPAIRv2	syn	0.0911345	A		SRR10523755	REPAIRv2	Conservative	0.0903832	A		SRR10523755	REPAIRv2	Conservative	0.0716414	A		SRR10523721	RESCUE	4th	0.670482	A		SRR10523721	RESCUE	4th	0.160656	A		SRR10523724	RESCUE	ClinVar	0.541509	A		SRR10523724	RESCUE	ClinVar	0.147157	A
SRR10523756	REPAIRv1(X85W)	non-syn	0.0694529	A		SRR10523756	REPAIRv1(X85W)	non-syn	0.0694529	A		SRR10523756	REPAIRv1(X85W)	Non-conservative	1.16609	A		SRR10523756	REPAIRv1(X85W)	Non-conservative	0.078629	A		SRR10523759	RESCUE+S375A	4th	0.122505	A		SRR10523759	RESCUE+S375A	4th	0.117871	A		SRR10523713	RESCUE	ClinVar	0.381225	A		SRR10523713	RESCUE	ClinVar	0.126205	A
SRR10523756	REPAIRv1(X85W)	syn	0.101786	A		SRR10523756	REPAIRv1(X85W)	syn	0.101786	A		SRR10523756	REPAIRv1(X85W)	Conservative	1.15351	A		SRR10523756	REPAIRv1(X85W)	Conservative	0.0729338	A		SRR10523727	RESCUE+N473I	4th	0.303578	A		SRR10523727	RESCUE+N473I	4th	0.115927	A		SRR10523721	RESCUE	ClinVar	0.540664	A		SRR10523721	RESCUE	ClinVar	0.145403	A
SRR10523757	RESCUE	non-syn	0.331211	A		SRR10523757	RESCUE	non-syn	0.331211	A		SRR10523757	RESCUE	Non-conservative	1.01205	A		SRR10523757	RESCUE	Non-conservative	0.26807	A		SRR10523725	RESCUE+N473I	4th	0.367482	A		SRR10523725	RESCUE+N473I	4th	0.118258	A		SRR10523744	RESCUE	ClinVar	0.527641	A		SRR10523744	RESCUE	ClinVar	0.190769	A
SRR10523757	RESCUE	syn	0.335327	A		SRR10523757	RESCUE	syn	0.335327	A		SRR10523757	RESCUE	Conservative	0.992431	A		SRR10523757	RESCUE	Conservative	0.0948891	A		SRR10523737	RESCUE+S375A	4th	0.119016	A		SRR10523737	RESCUE+S375A	4th	0.117231	A		SRR10523735	RESCUE	CDS	0.634547	A		SRR10523735	RESCUE	CDS	0.119894	A
SRR10523758	RESCUE+N473I	non-syn	0.254664	A		SRR10523758	RESCUE+N473I	non-syn	0.254664	A		SRR10523758	RESCUE+N473I	Non-conservative	0.551105	A		SRR10523758	RESCUE+N473I	Non-conservative	0.143472	A		SRR10523758	RESCUE+N473I	4th	0.354225	A		SRR10523758	RESCUE+N473I	4th	0.1157	A		SRR10523726	RESCUE	CDS	0.552565	A		SRR10523726	RESCUE	CDS	0.11072	A
SRR10523758	RESCUE+N473I	syn	0.250308	A		SRR10523758	RESCUE+N473I	syn	0.250308	A		SRR10523758	RESCUE+N473I	Conservative	0.537368	A		SRR10523758	RESCUE+N473I	Conservative	0.0777987	A		SRR10523718	RESCUE+S375C	4th	0.194117	A		SRR10523718	RESCUE+S375C	4th	0.121194	A		SRR10523757	RESCUE	CDS	0.68189	A		SRR10523757	RESCUE	CDS	0.125288	A
SRR10523759	RESCUE+S375A	non-syn	0.481567	A		SRR10523759	RESCUE+S375A	non-syn	0.481567	A		SRR10523759	RESCUE+S375A	Non-conservative	0.181322	A		SRR10523759	RESCUE+S375A	Non-conservative	0.151416	A		SRR10523763	RESCUE+S375A	4th	0.118884	A		SRR10523763	RESCUE+S375A	4th	0.122873	A		SRR10523715	RESCUE	CDS	0.65854	A		SRR10523715	RESCUE	CDS	0.122737	A
SRR10523759	RESCUE+S375A	syn	0.458738	A		SRR10523759	RESCUE+S375A	syn	0.458738	A		SRR10523759	RESCUE+S375A	Conservative	0.170833	A		SRR10523759	RESCUE+S375A	Conservative	0.0762045	A		SRR10523736	RESCUE+N473I	4th	0.308362	A		SRR10523736	RESCUE+N473I	4th	0.110999	A		SRR10523704	RESCUE	CDS	0.6672	A		SRR10523704	RESCUE	CDS	0.123104	A
SRR10523760	RESCUE+S375C	non-syn	0.307129	A		SRR10523760	RESCUE+S375C	non-syn	0.307129	A		SRR10523760	RESCUE+S375C	Non-conservative	0.309036	A		SRR10523760	RESCUE+S375C	Non-conservative	0.161463	A		SRR10523702	REPAIRv1(N81S)	4th	0.334333	A		SRR10523702	REPAIRv1(N81S)	4th	0.0968976	A		SRR10523724	RESCUE	CDS	0.684416	A		SRR10523724	RESCUE	CDS	0.125677	A
SRR10523760	RESCUE+S375C	syn	0.28241	A		SRR10523760	RESCUE+S375C	syn	0.28241	A		SRR10523760	RESCUE+S375C	Conservative	0.304268	A		SRR10523760	RESCUE+S375C	Conservative	0.0816288	A		SRR10523744	RESCUE	4th	0.699614	A		SRR10523744	RESCUE	4th	0.163423	A		SRR10523713	RESCUE	CDS	0.648785	A		SRR10523713	RESCUE	CDS	0.121502	A
SRR10523761	RESCUE+S375N	non-syn	0.281435	A		SRR10523761	RESCUE+S375N	non-syn	0.281435	A		SRR10523761	RESCUE+S375N	Non-conservative	0.604456	A		SRR10523761	RESCUE+S375N	Non-conservative	0.163737	A		SRR10523745	RESCUE+N473I	4th	0.398223	A		SRR10523745	RESCUE+N473I	4th	0.119596	A		SRR10523721	RESCUE	CDS	0.678956	A		SRR10523721	RESCUE	CDS	0.127978	A
SRR10523761	RESCUE+S375N	syn	0.273865	A		SRR10523761	RESCUE+S375N	syn	0.273865	A		SRR10523761	RESCUE+S375N	Conservative	0.568139	A		SRR10523761	RESCUE+S375N	Conservative	0.0812522	A		SRR10523766	REPAIRv1(N81S)	4th	0.297132	A		SRR10523766	REPAIRv1(N81S)	4th	0.100757	A		SRR10523744	RESCUE	CDS	0.707441	A		SRR10523744	RESCUE	CDS	0.130044	A
SRR10523762	REPAIRv1(N81S)	non-syn	0.0700231	A		SRR10523762	REPAIRv1(N81S)	non-syn	0.0700231	A		SRR10523762	REPAIRv1(N81S)	Non-conservative	0.365175	A		SRR10523762	REPAIRv1(N81S)	Non-conservative	0.0801981	A		SRR10523738	RESCUE+S375C	4th	0.18687	A		SRR10523738	RESCUE+S375C	4th	0.11575	A		SRR10523732	RESCUE+N473I	Essential genes	0.330044	A		SRR10523732	RESCUE+N473I	Essential genes	0.0757485	A
SRR10523762	REPAIRv1(N81S)	syn	0.102987	A		SRR10523762	REPAIRv1(N81S)	syn	0.102987	A		SRR10523762	REPAIRv1(N81S)	Conservative	0.356609	A		SRR10523762	REPAIRv1(N81S)	Conservative	0.073626	A		SRR10523730	RESCUE+S375N	4th	0.358969	A		SRR10523730	RESCUE+S375N	4th	0.11839	A		SRR10523732	RESCUE+N473I	Oncogenes	0.292045	A		SRR10523732	RESCUE+N473I	Oncogenes	0.0725179	A
SRR10523763	RESCUE+S375A	non-syn	0.381273	A		SRR10523763	RESCUE+S375A	non-syn	0.381273	A		SRR10523763	RESCUE+S375A	Non-conservative	0.217399	A		SRR10523763	RESCUE+S375A	Non-conservative	0.156271	A		SRR10523710	REPAIRv1(X85W)	4th	0.811134	A		SRR10523710	REPAIRv1(X85W)	4th	0.0990132	A		SRR10523714	RESCUE+N473I	Oncogenes	0.268844	A		SRR10523714	RESCUE+N473I	Oncogenes	0.0708673	A
SRR10523763	RESCUE+S375A	syn	0.332539	A		SRR10523763	RESCUE+S375A	syn	0.332539	A		SRR10523763	RESCUE+S375A	Conservative	0.205186	A		SRR10523763	RESCUE+S375A	Conservative	0.0822361	A		SRR10523706	RESCUE+S375A	4th	0.117654	A		SRR10523706	RESCUE+S375A	4th	0.117004	A		SRR10523705	RESCUE+N473I	Oncogenes	0.258717	A		SRR10523705	RESCUE+N473I	Oncogenes	0.0695283	A
SRR10523764	RESCUE+S375C	non-syn	0.352959	A		SRR10523764	RESCUE+S375C	non-syn	0.352959	A		SRR10523764	RESCUE+S375C	Non-conservative	0.302307	A		SRR10523764	RESCUE+S375C	Non-conservative	0.155425	A		SRR10523753	REPAIRv1(N81S)	4th	0.308257	A		SRR10523753	REPAIRv1(N81S)	4th	0.0975559	A		SRR10523716	RESCUE+N473I	Oncogenes	0.266663	A		SRR10523716	RESCUE+N473I	Oncogenes	0.0720755	A
SRR10523764	RESCUE+S375C	syn	0.305817	A		SRR10523764	RESCUE+S375C	syn	0.305817	A		SRR10523764	RESCUE+S375C	Conservative	0.305909	A		SRR10523764	RESCUE+S375C	Conservative	0.0805294	A		SRR10523719	RESCUE+S375N	4th	0.416076	A		SRR10523719	RESCUE+S375N	4th	0.126924	A		SRR10523732	RESCUE+N473I	Oncogenes	0.292045	A		SRR10523732	RESCUE+N473I	Oncogenes	0.0725179	A
SRR10523765	RESCUE+S375N	non-syn	0.348171	A		SRR10523765	RESCUE+S375N	non-syn	0.348171	A		SRR10523765	RESCUE+S375N	Non-conservative	0.674825	A		SRR10523765	RESCUE+S375N	Non-conservative	0.175405	A		SRR10523755	REPAIRv2	4th	0.11097	A		SRR10523755	REPAIRv2	4th	0.0981113	A		SRR10523714	RESCUE+N473I	Oncogenes	0.268844	A		SRR10523714	RESCUE+N473I	Oncogenes	0.0708673	A
SRR10523765	RESCUE+S375N	syn	0.318182	A		SRR10523765	RESCUE+S375N	syn	0.318182	A		SRR10523765	RESCUE+S375N	Conservative	0.632316	A		SRR10523765	RESCUE+S375N	Conservative	0.080755	A		SRR10523752	RESCUE+S375N	4th	0.381752	A		SRR10523752	RESCUE+S375N	4th	0.120559	A		SRR10523705	RESCUE+N473I	Oncogenes	0.258717	A		SRR10523705	RESCUE+N473I	Oncogenes	0.0695283	A
SRR10523766	REPAIRv1(N81S)	non-syn	0.22835	A		SRR10523766	REPAIRv1(N81S)	non-syn	0.22835	A		SRR10523766	REPAIRv1(N81S)	Non-conservative	0.414599	A		SRR10523766	REPAIRv1(N81S)	Non-conservative	0.0780202	A		SRR10523748	RESCUE+S375N	4th	0.427937	A		SRR10523748	RESCUE+S375N	4th	0.129038	A		SRR10523716	RESCUE+N473I	Oncogenes	0.266663	A		SRR10523716	RESCUE+N473I	Oncogenes	0.0720755	A
SRR10523766	REPAIRv1(N81S)	syn	0.25547	A		SRR10523766	REPAIRv1(N81S)	syn	0.25547	A		SRR10523766	REPAIRv1(N81S)	Conservative	0.412688	A		SRR10523766	REPAIRv1(N81S)	Conservative	0.0766422	A		SRR10523751	RESCUE+S375C	4th	0.192601	A		SRR10523751	RESCUE+S375C	4th	0.121518	A		SRR10523725	RESCUE+N473I	Oncogenes	0.272375	A		SRR10523725	RESCUE+N473I	Oncogenes	0.0713895	A
SRR6686536	2BoxB-4LN-DD NLS	non-syn	0.146546	B		SRR8909009	GFP	non-syn	0.018307	D		SRR6686536	2BoxB-4LN-DD NLS	Non-conservative	0.212627	B		SRR8790747	BE3-site 3	Non-conservative	0.176206	H		SRR10523707	RESCUE+S375C	5th	0.196189	A		SRR10523707	RESCUE+S375C	5th	0.117966	A		SRR10523727	RESCUE+N473I	Oncogenes	0.225955	A		SRR10523727	RESCUE+N473I	Oncogenes	0.0688065	A
SRR6686536	2BoxB-4LN-DD NLS	syn	0.152108	B		SRR8909009	GFP	syn	0.0303215	D		SRR6686536	2BoxB-4LN-DD NLS	Conservative	0.178421	B		SRR8790747	BE3-site 3	Conservative	0.0975206	H		SRR10523742	REPAIRv1(X85W)	5th	0.782619	A		SRR10523742	REPAIRv1(X85W)	5th	0.0900397	A		SRR10523758	RESCUE+N473I	Oncogenes	0.257877	A		SRR10523758	RESCUE+N473I	Oncogenes	0.0694396	A
SRR6686537	2BoxB-4LN-DD E488Q	non-syn	0.794776	B		SRR8909015	GFP	non-syn	0.0192257	D		SRR6686537	2BoxB-4LN-DD E488Q	Non-conservative	1.03501	B		SRR8790748	BE3(W90A)-site 3	Non-conservative	0.0346041	H		SRR10523750	RESCUE+S375A	5th	0.11657	A		SRR10523750	RESCUE+S375A	5th	0.114188	A		SRR10523736	RESCUE+N473I	Oncogenes	0.215906	A		SRR10523736	RESCUE+N473I	Oncogenes	0.0637061	A
SRR6686537	2BoxB-4LN-DD E488Q	syn	0.765928	B		SRR8909015	GFP	syn	0.031658	D		SRR6686537	2BoxB-4LN-DD E488Q	Conservative	1.01139	B		SRR8790748	BE3(W90A)-site 3	Conservative	0.0384695	H		SRR10523735	RESCUE	5th	0.645357	A		SRR10523735	RESCUE	5th	0.154498	A		SRR10523745	RESCUE+N473I	Oncogenes	0.288927	A		SRR10523745	RESCUE+N473I	Oncogenes	0.074519	A
SRR6686538	No guide-No enzyme	non-syn	0.0289784	B		SRR8909021	GFP	non-syn	0.0184632	D		SRR6686538	No guide-No enzyme	Non-conservative	0.0286613	B		SRR8790749	BE3(W90A)-site 3	Non-conservative	0.036246	H		SRR10523739	RESCUE+S375N	5th	0.399699	A		SRR10523739	RESCUE+S375N	5th	0.115145	A		SRR10523727	RESCUE+N473I	Oncogenes	0.225955	A		SRR10523727	RESCUE+N473I	Oncogenes	0.0688065	A
SRR6686538	No guide-No enzyme	syn	0.0375858	B		SRR8909021	GFP	syn	0.0311735	D		SRR6686538	No guide-No enzyme	Conservative	0.0303526	B		SRR8790749	BE3(W90A)-site 3	Conservative	0.0396363	H		SRR10523729	RESCUE+S375C	5th	0.181529	A		SRR10523729	RESCUE+S375C	5th	0.111282	A		SRR10523725	RESCUE+N473I	Oncogenes	0.272375	A		SRR10523725	RESCUE+N473I	Oncogenes	0.0713895	A
SRR6686539	2BoxB-4LN-DD	non-syn	0.321484	B		SRR8910093	hA3A-BE3	non-syn	0.463481	D		SRR6686539	2BoxB-4LN-DD	Non-conservative	0.433329	B		SRR8790752	APOBEC1	Non-conservative	0.72299	H		SRR10523709	REPAIRv1(N81S)	5th	0.311325	A		SRR10523709	REPAIRv1(N81S)	5th	0.0905953	A		SRR10523758	RESCUE+N473I	Oncogenes	0.257877	A		SRR10523758	RESCUE+N473I	Oncogenes	0.0694396	A
SRR6686539	2BoxB-4LN-DD	syn	0.324704	B		SRR8910093	hA3A-BE3	syn	0.542089	D		SRR6686539	2BoxB-4LN-DD	Conservative	0.376856	B		SRR8790752	APOBEC1	Conservative	0.357418	H		SRR10523726	RESCUE	5th	0.574785	A		SRR10523726	RESCUE	5th	0.146362	A		SRR10523736	RESCUE+N473I	Oncogenes	0.215906	A		SRR10523736	RESCUE+N473I	Oncogenes	0.0637061	A
SRR6686540	No guide-4LN-DD NLS	non-syn	0.025815	B		SRR8910094	eA3A-BE3	non-syn	0.0341919	D		SRR6686540	No guide-4LN-DD NLS	Non-conservative	0.0240294	B		SRR8790754	APOBEC1	Non-conservative	0.77982	H		SRR10523732	RESCUE+N473I	5th	0.402335	A		SRR10523732	RESCUE+N473I	5th	0.125129	A		SRR10523745	RESCUE+N473I	Oncogenes	0.288927	A		SRR10523745	RESCUE+N473I	Oncogenes	0.074519	A
SRR6686540	No guide-4LN-DD NLS	syn	0.0333911	B		SRR8910094	eA3A-BE3	syn	0.055631	D		SRR6686540	No guide-4LN-DD NLS	Conservative	0.0270898	B		SRR8790754	APOBEC1	Conservative	0.378352	H		SRR10523723	REPAIRv1(X85W)	5th	0.910385	A		SRR10523723	REPAIRv1(X85W)	5th	0.0916321	A		SRR10523732	RESCUE+N473I	ClinVar	0.351666	A		SRR10523732	RESCUE+N473I	ClinVar	0.0707032	A
SRR6686541	No guide-4LN-DD E488Q NLS	non-syn	0.189249	B		SRR8910095	hAID-BE3	non-syn	0.0291242	D		SRR6686541	No guide-4LN-DD E488Q NLS	Non-conservative	0.235535	B		SRR8790755	APOBEC1	Non-conservative	0.769065	H		SRR10523714	RESCUE+N473I	5th	0.368703	A		SRR10523714	RESCUE+N473I	5th	0.11751	A		SRR10523714	RESCUE+N473I	ClinVar	0.213784	A		SRR10523714	RESCUE+N473I	ClinVar	0.0812463	A
SRR6686541	No guide-4LN-DD E488Q NLS	syn	0.191332	B		SRR8910095	hAID-BE3	syn	0.0500196	D		SRR6686541	No guide-4LN-DD E488Q NLS	Conservative	0.238403	B		SRR8790755	APOBEC1	Conservative	0.375503	H		SRR10523734	REPAIRv1(X85W)	5th	0.688364	A		SRR10523734	REPAIRv1(X85W)	5th	0.085989	A		SRR10523705	RESCUE+N473I	ClinVar	0.192364	A		SRR10523705	RESCUE+N473I	ClinVar	0.0552818	A
SRR6686542	2BoxB-4LN-DD E488Q NLS	non-syn	0.410314	B		SRR8910097	hA3A-BE3	non-syn	0.456976	D		SRR6686542	2BoxB-4LN-DD E488Q NLS	Non-conservative	0.586508	B		SRR8790756	GFP	Non-conservative	0.0323049	H		SRR10523762	REPAIRv1(N81S)	5th	0.268938	A		SRR10523762	REPAIRv1(N81S)	5th	0.0957334	A		SRR10523716	RESCUE+N473I	ClinVar	0.335021	A		SRR10523716	RESCUE+N473I	ClinVar	0.0685382	A
SRR6686542	2BoxB-4LN-DD E488Q NLS	syn	0.395586	B		SRR8910097	hA3A-BE3	syn	0.53731	D		SRR6686542	2BoxB-4LN-DD E488Q NLS	Conservative	0.555054	B		SRR8790756	GFP	Conservative	0.0369686	H		SRR10523740	REPAIRv1(N81S)	5th	0.315614	A		SRR10523740	REPAIRv1(N81S)	5th	0.0910103	A		SRR10523727	RESCUE+N473I	ClinVar	0.240975	A		SRR10523727	RESCUE+N473I	ClinVar	0.0669894	A
SRR6686543	2BoxB-No enzyme	non-syn	0.0256097	B		SRR8910098	eA3A-BE3	non-syn	0.0326898	D		SRR6686543	2BoxB-No enzyme	Non-conservative	0.0239837	B		SRR8790757	GFP	Non-conservative	0.0327275	H		SRR10523756	REPAIRv1(X85W)	5th	0.865753	A		SRR10523756	REPAIRv1(X85W)	5th	0.0922101	A		SRR10523725	RESCUE+N473I	ClinVar	0.214903	A		SRR10523725	RESCUE+N473I	ClinVar	0.06504	A
SRR6686543	2BoxB-No enzyme	syn	0.0334507	B		SRR8910098	eA3A-BE3	syn	0.0562169	D		SRR6686543	2BoxB-No enzyme	Conservative	0.0269727	B		SRR8790757	GFP	Conservative	0.0384178	H		SRR10523711	REPAIRv2	5th	0.105032	A		SRR10523711	REPAIRv2	5th	0.0937883	A		SRR10523758	RESCUE+N473I	ClinVar	0.336547	A		SRR10523758	RESCUE+N473I	ClinVar	0.0784	A
SRR8979748	Cas9D10A	non-syn	0.225487	C		SRR8910099	hAID-BE3	non-syn	0.0286776	D		SRR8979748	Cas9D10A	Non-conservative	0.227486	C		SRR8790758	BE3-site 3	Non-conservative	0.182042	H		SRR10523705	RESCUE+N473I	5th	0.361899	A		SRR10523705	RESCUE+N473I	5th	0.119517	A		SRR10523736	RESCUE+N473I	ClinVar	0.158545	A		SRR10523736	RESCUE+N473I	ClinVar	0.0617486	A
SRR8979748	Cas9D10A	syn	0.225557	C		SRR8910099	hAID-BE3	syn	0.0497553	D		SRR8979748	Cas9D10A	Conservative	0.224434	C		SRR8790758	BE3-site 3	Conservative	0.100815	H		SRR10523708	RESCUE+S375N	5th	0.409023	A		SRR10523708	RESCUE+S375N	5th	0.119763	A		SRR10523745	RESCUE+N473I	ClinVar	0.307513	A		SRR10523745	RESCUE+N473I	ClinVar	0.0840038	A
SRR8979749	ABEmax(TadAE59A,TadA*E59A)	non-syn	0.234932	C		SRR8910101	hA3A-BE3	non-syn	0.490649	D		SRR8979749	ABEmax(TadAE59A,TadA*E59A)	Non-conservative	0.237195	C		SRR8790759	BE3-RNF2	Non-conservative	0.233508	H		SRR10523757	RESCUE	5th	0.694526	A		SRR10523757	RESCUE	5th	0.162116	A		SRR10523732	RESCUE+N473I	CDS	0.386022	A		SRR10523732	RESCUE+N473I	CDS	0.0757594	A
SRR8979749	ABEmax(TadAE59A,TadA*E59A)	syn	0.235008	C		SRR8910101	hA3A-BE3	syn	0.57905	D		SRR8979749	ABEmax(TadAE59A,TadA*E59A)	Conservative	0.229375	C		SRR8790759	BE3-RNF2	Conservative	0.124017	H		SRR10523747	RESCUE+S375C	5th	0.20368	A		SRR10523747	RESCUE+S375C	5th	0.118452	A		SRR10523714	RESCUE+N473I	CDS	0.360206	A		SRR10523714	RESCUE+N473I	CDS	0.0722963	A
SRR8979750	ABEmax(TadAE59A)	non-syn	0.292936	C		SRR8910102	eA3A-BE3	non-syn	0.0320963	D		SRR8979750	ABEmax(TadAE59A)	Non-conservative	0.345953	C		SRR8790760	BE3-RNF2	Non-conservative	0.20854	H		SRR10523720	REPAIRv1(N81S)	5th	0.30936	A		SRR10523720	REPAIRv1(N81S)	5th	0.0912579	A		SRR10523705	RESCUE+N473I	CDS	0.338938	A		SRR10523705	RESCUE+N473I	CDS	0.0716448	A
SRR8979750	ABEmax(TadAE59A)	syn	0.292997	C		SRR8910102	eA3A-BE3	syn	0.0552308	D		SRR8979750	ABEmax(TadAE59A)	Conservative	0.333894	C		SRR8790760	BE3-RNF2	Conservative	0.113082	H		SRR10523716	RESCUE+N473I	5th	0.367444	A		SRR10523716	RESCUE+N473I	5th	0.116819	A		SRR10523716	RESCUE+N473I	CDS	0.344658	A		SRR10523716	RESCUE+N473I	CDS	0.0710316	A
SRR8979751	ABEmax	non-syn	0.363793	C		SRR8910103	hAID-BE3	non-syn	0.0294713	D		SRR8979751	ABEmax	Non-conservative	0.491471	C		SRR8790761	BE3-RNF2	Non-conservative	0.22962	H		SRR10523703	REPAIRv2	5th	0.10789	A		SRR10523703	REPAIRv2	5th	0.102177	A		SRR10523727	RESCUE+N473I	CDS	0.29006	A		SRR10523727	RESCUE+N473I	CDS	0.0681248	A
SRR8979751	ABEmax	syn	0.363933	C		SRR8910103	hAID-BE3	syn	0.0503356	D		SRR8979751	ABEmax	Conservative	0.444048	C		SRR8790761	BE3-RNF2	Conservative	0.122575	H		SRR10523765	RESCUE+S375N	5th	0.431034	A		SRR10523765	RESCUE+S375N	5th	0.130809	A		SRR10523725	RESCUE+N473I	CDS	0.361133	A		SRR10523725	RESCUE+N473I	CDS	0.0723393	A
SRR8979752	ABEmax(TadAE59A,TadA*E59A)	non-syn	0.229296	C		SRR8910104	GFP	non-syn	0.0216324	D		SRR8979752	ABEmax(TadAE59A,TadA*E59A)	Non-conservative	0.231626	C		SRR8790768	BE3(hA3A)-site 3	Non-conservative	0.130378	H		SRR10523731	REPAIRv1(N81S)	5th	0.238297	A		SRR10523731	REPAIRv1(N81S)	5th	0.0903302	A		SRR10523758	RESCUE+N473I	CDS	0.345326	A		SRR10523758	RESCUE+N473I	CDS	0.0728626	A
SRR8979752	ABEmax(TadAE59A,TadA*E59A)	syn	0.229342	C		SRR8910104	GFP	syn	0.0428217	D		SRR8979752	ABEmax(TadAE59A,TadA*E59A)	Conservative	0.228365	C		SRR8790768	BE3(hA3A)-site 3	Conservative	0.068874	H		SRR10523754	RESCUE+S375C	5th	0.20876	A		SRR10523754	RESCUE+S375C	5th	0.120627	A		SRR10523736	RESCUE+N473I	CDS	0.290301	A		SRR10523736	RESCUE+N473I	CDS	0.0671202	A
SRR8979753	ABEmax(TadAE59A)	non-syn	0.384898	C		SRR11561273	BE4-rAPOBEC1	non-syn	NA	E		SRR8979753	ABEmax(TadAE59A)	Non-conservative	0.518155	C		SRR8790769	BE3(hA3A)-site 3	Non-conservative	0.133818	H		SRR10523715	RESCUE	5th	0.682167	A		SRR10523715	RESCUE	5th	0.163833	A		SRR10523745	RESCUE+N473I	CDS	0.387262	A		SRR10523745	RESCUE+N473I	CDS	0.077749	A
SRR8979753	ABEmax(TadAE59A)	syn	0.385019	C		SRR11561273	BE4-rAPOBEC1	syn	NA	E		SRR8979753	ABEmax(TadAE59A)	Conservative	0.479194	C		SRR8790769	BE3(hA3A)-site 3	Conservative	0.0700843	H		SRR10523704	RESCUE	5th	0.683314	A		SRR10523704	RESCUE	5th	0.154057	A		SRR10523750	RESCUE+S375A	Essential genes	0.055442	A		SRR10523750	RESCUE+S375A	Essential genes	0.0677989	A
SRR8979754	ABEmax	non-syn	0.376367	C		SRR11561274	BE4-SsAPOBEC3B	non-syn	0.071217	E		SRR8979754	ABEmax	Non-conservative	0.519048	C		SRR8790770	BE3(hA3A)-site 3	Non-conservative	0.142514	H		SRR10523746	RESCUE+S375A	5th	0.125706	A		SRR10523746	RESCUE+S375A	5th	0.123784	A		SRR10523750	RESCUE+S375A	Oncogenes	0.0568709	A		SRR10523750	RESCUE+S375A	Oncogenes	0.0685876	A
SRR8979754	ABEmax	syn	0.376501	C		SRR11561274	BE4-SsAPOBEC3B	syn	0.23268	E		SRR8979754	ABEmax	Conservative	0.467176	C		SRR8790770	BE3(hA3A)-site 3	Conservative	0.0730528	H		SRR10523701	RESCUE+S375N	5th	0.425014	A		SRR10523701	RESCUE+S375N	5th	0.128138	A		SRR10523750	RESCUE+S375A	Oncogenes	0.0568709	A		SRR10523750	RESCUE+S375A	Oncogenes	0.0685876	A
SRR8979755	ABEmaxAW	non-syn	0.248645	C		SRR11561275	BE4-SsAPOBEC3B	non-syn	NA	E		SRR8979755	ABEmaxAW	Non-conservative	0.278018	C		SRR8790771	BE3(W90A)-site 3	Non-conservative	0.0357118	H		SRR10523724	RESCUE	5th	0.70039	A		SRR10523724	RESCUE	5th	0.161987	A		SRR10523746	RESCUE+S375A	Oncogenes	0.0594395	A		SRR10523746	RESCUE+S375A	Oncogenes	0.0735945	A
SRR8979755	ABEmaxAW	syn	0.248727	C		SRR11561275	BE4-SsAPOBEC3B	syn	NA	E		SRR8979755	ABEmaxAW	Conservative	0.268157	C		SRR8790771	BE3(W90A)-site 3	Conservative	0.0392426	H		SRR10523764	RESCUE+S375C	5th	0.18885	A		SRR10523764	RESCUE+S375C	5th	0.117933	A		SRR10523717	RESCUE+S375A	Oncogenes	0.0598973	A		SRR10523717	RESCUE+S375A	Oncogenes	0.0717582	A
SRR8979756	ABEmaxAW	non-syn	0.246658	C		SRR11561276	BE4-SsAPOBEC3B	non-syn	0.0699819	E		SRR8979756	ABEmaxAW	Non-conservative	0.270838	C		SRR8790772	GFP	Non-conservative	0.0332266	H		SRR10523749	REPAIRv1(N81S)	5th	0.299669	A		SRR10523749	REPAIRv1(N81S)	5th	0.0931265	A		SRR10523743	RESCUE+S375A	Oncogenes	0.0607075	A		SRR10523743	RESCUE+S375A	Oncogenes	0.0722721	A
SRR8979756	ABEmaxAW	syn	0.246709	C		SRR11561276	BE4-SsAPOBEC3B	syn	0.219066	E		SRR8979756	ABEmaxAW	Conservative	0.260533	C		SRR8790772	GFP	Conservative	0.0378745	H		SRR10523717	RESCUE+S375A	5th	0.118258	A		SRR10523717	RESCUE+S375A	5th	0.118974	A		SRR10523728	RESCUE+S375A	Oncogenes	0.0577059	A		SRR10523728	RESCUE+S375A	Oncogenes	0.0690615	A
SRR8979757	Cas9D10A	non-syn	0.230651	C		SRR11561277	BE4-SsAPOBEC3B	non-syn	0.070118	E		SRR8979757	Cas9D10A	Non-conservative	0.233647	C		SRR8790773	GFP	Non-conservative	0.0352744	H		SRR10523760	RESCUE+S375C	5th	0.201828	A		SRR10523760	RESCUE+S375C	5th	0.124555	A		SRR10523746	RESCUE+S375A	Oncogenes	0.0594395	A		SRR10523746	RESCUE+S375A	Oncogenes	0.0735945	A
SRR8979757	Cas9D10A	syn	0.230734	C		SRR11561277	BE4-SsAPOBEC3B	syn	0.218149	E		SRR8979757	Cas9D10A	Conservative	0.230273	C		SRR8790773	GFP	Conservative	0.0382844	H		SRR10523761	RESCUE+S375N	5th	0.401456	A		SRR10523761	RESCUE+S375N	5th	0.122248	A		SRR10523759	RESCUE+S375A	Oncogenes	0.0608651	A		SRR10523759	RESCUE+S375A	Oncogenes	0.0714833	A
SRR8979758	ABEmax(TadAE59A)	non-syn	0.347586	C		SRR11561278	nCas9	non-syn	NA	E		SRR8979758	ABEmax(TadAE59A)	Non-conservative	0.445389	C		SRR8790776	GFP	Non-conservative	0.0351778	H		SRR10523733	REPAIRv2	5th	0.101663	A		SRR10523733	REPAIRv2	5th	0.0911794	A		SRR10523737	RESCUE+S375A	Oncogenes	0.0589177	A		SRR10523737	RESCUE+S375A	Oncogenes	0.0702111	A
SRR8979758	ABEmax(TadAE59A)	syn	0.347678	C		SRR11561278	nCas9	syn	NA	E		SRR8979758	ABEmax(TadAE59A)	Conservative	0.41545	C		SRR8790776	GFP	Conservative	0.038607	H		SRR10523712	REPAIRv1(X85W)	5th	0.854134	A		SRR10523712	REPAIRv1(X85W)	5th	0.0906725	A		SRR10523717	RESCUE+S375A	Oncogenes	0.0598973	A		SRR10523717	RESCUE+S375A	Oncogenes	0.0717582	A
SRR8979759	ABEmax	non-syn	0.403827	C		SRR11561279	BE4-SsAPOBEC3B	non-syn	0.0717004	E		SRR8979759	ABEmax	Non-conservative	0.551897	C		SRR8790777	GFP	Non-conservative	0.0344573	H		SRR10523743	RESCUE+S375A	5th	0.119929	A		SRR10523743	RESCUE+S375A	5th	0.118458	A		SRR10523763	RESCUE+S375A	Oncogenes	0.0629611	A		SRR10523763	RESCUE+S375A	Oncogenes	0.0730381	A
SRR8979759	ABEmax	syn	0.403991	C		SRR11561279	BE4-SsAPOBEC3B	syn	0.227885	E		SRR8979759	ABEmax	Conservative	0.491682	C		SRR8790777	GFP	Conservative	0.0383454	H		SRR10523741	REPAIRv2	5th	0.107356	A		SRR10523741	REPAIRv2	5th	0.0944938	A		SRR10523743	RESCUE+S375A	Oncogenes	0.0607075	A		SRR10523743	RESCUE+S375A	Oncogenes	0.0722721	A
SRR8979760	Cas9D10A	non-syn	0.221037	C		SRR11561280	BE4-SsAPOBEC3B	non-syn	0.0715249	E		SRR8979760	Cas9D10A	Non-conservative	0.2269	C		SRR8790778	BE3	Non-conservative	0.473471	H		SRR10523722	REPAIRv2	5th	0.107759	A		SRR10523722	REPAIRv2	5th	0.0958043	A		SRR10523728	RESCUE+S375A	Oncogenes	0.0577059	A		SRR10523728	RESCUE+S375A	Oncogenes	0.0690615	A
SRR8979760	Cas9D10A	syn	0.221088	C		SRR11561280	BE4-SsAPOBEC3B	syn	0.227857	E		SRR8979760	Cas9D10A	Conservative	0.221042	C		SRR8790778	BE3	Conservative	0.233574	H		SRR10523728	RESCUE+S375A	5th	0.115562	A		SRR10523728	RESCUE+S375A	5th	0.115569	A		SRR10523706	RESCUE+S375A	Oncogenes	0.0612519	A		SRR10523706	RESCUE+S375A	Oncogenes	0.0680144	A
SRR8979761	ABEmax(TadAE59A,TadA*E59A)	non-syn	0.239276	C		SRR11561281	BE4-AmAPOBEC1	non-syn	0.0732742	E		SRR8979761	ABEmax(TadAE59A,TadA*E59A)	Non-conservative	0.238463	C		SRR8790779	BE3	Non-conservative	0.475221	H		SRR10523713	RESCUE	5th	0.656343	A		SRR10523713	RESCUE	5th	0.156142	A		SRR10523759	RESCUE+S375A	Oncogenes	0.0608651	A		SRR10523759	RESCUE+S375A	Oncogenes	0.0714833	A
SRR8979761	ABEmax(TadAE59A,TadA*E59A)	syn	0.239328	C		SRR11561281	BE4-AmAPOBEC1	syn	0.230013	E		SRR8979761	ABEmax(TadAE59A,TadA*E59A)	Conservative	0.238536	C		SRR8790779	BE3	Conservative	0.235438	H		SRR10523721	RESCUE	5th	0.701942	A		SRR10523721	RESCUE	5th	0.161903	A		SRR10523737	RESCUE+S375A	Oncogenes	0.0589177	A		SRR10523737	RESCUE+S375A	Oncogenes	0.0702111	A
SRR8979762	ABEmaxAW	non-syn	0.254516	C		SRR11561282	BE4-AmAPOBEC1	non-syn	0.0731575	E		SRR8979762	ABEmaxAW	Non-conservative	0.273347	C		SRR8790781	BE3	Non-conservative	0.622509	H		SRR10523759	RESCUE+S375A	5th	0.122215	A		SRR10523759	RESCUE+S375A	5th	0.111585	A		SRR10523763	RESCUE+S375A	Oncogenes	0.0629611	A		SRR10523763	RESCUE+S375A	Oncogenes	0.0730381	A
SRR8979762	ABEmaxAW	syn	0.254577	C		SRR11561282	BE4-AmAPOBEC1	syn	0.228807	E		SRR8979762	ABEmaxAW	Conservative	0.267864	C		SRR8790781	BE3	Conservative	0.285574	H		SRR10523727	RESCUE+N473I	5th	0.314829	A		SRR10523727	RESCUE+N473I	5th	0.115214	A		SRR10523706	RESCUE+S375A	Oncogenes	0.0612519	A		SRR10523706	RESCUE+S375A	Oncogenes	0.0680144	A
SRR8908975	ABEmax	non-syn	0.42102	D		SRR11561283	BE4-AmAPOBEC1	non-syn	0.0755708	E		SRR8908975	ABEmax	Non-conservative	0.709553	D		SRR9027793	BE3(hA3AR128A)-site 3	Non-conservative	0.0672619	H		SRR10523725	RESCUE+N473I	5th	0.375296	A		SRR10523725	RESCUE+N473I	5th	0.120795	A		SRR10523750	RESCUE+S375A	ClinVar	0.0265053	A		SRR10523750	RESCUE+S375A	ClinVar	0.0617147	A
SRR8908975	ABEmax	syn	0.386358	D		SRR11561283	BE4-AmAPOBEC1	syn	0.224024	E		SRR8908975	ABEmax	Conservative	0.591853	D		SRR9027793	BE3(hA3AR128A)-site 3	Conservative	0.0779465	H		SRR10523737	RESCUE+S375A	5th	0.118202	A		SRR10523737	RESCUE+S375A	5th	0.117549	A		SRR10523746	RESCUE+S375A	ClinVar	0.0462802	A		SRR10523746	RESCUE+S375A	ClinVar	0.0924601	A
SRR8908976	miniABEmax	non-syn	0.368702	D		SRR11561284	BE4-AmAPOBEC1	non-syn	0.0755135	E		SRR8908976	miniABEmax	Non-conservative	0.629673	D		SRR9027794	BE3(hA3AR128A)-site 3	Non-conservative	0.066958	H		SRR10523718	RESCUE+S375C	5th	0.199765	A		SRR10523718	RESCUE+S375C	5th	0.124951	A		SRR10523717	RESCUE+S375A	ClinVar	0.0267977	A		SRR10523717	RESCUE+S375A	ClinVar	0.066978	A
SRR8908976	miniABEmax	syn	0.343074	D		SRR11561284	BE4-AmAPOBEC1	syn	0.224694	E		SRR8908976	miniABEmax	Conservative	0.552437	D		SRR9027794	BE3(hA3AR128A)-site 3	Conservative	0.0788049	H		SRR10523758	RESCUE+N473I	5th	0.363778	A		SRR10523758	RESCUE+N473I	5th	0.114637	A		SRR10523743	RESCUE+S375A	ClinVar	0.0430802	A		SRR10523743	RESCUE+S375A	ClinVar	0.0680671	A
SRR8908977	K20A/R21A	non-syn	0.0772554	D		SRR11561285	BE4-AmAPOBEC1	non-syn	0.0744909	E		SRR8908977	K20A/R21A	Non-conservative	0.131462	D		SRR9027800	BE3(W90Y/R126E)-site 3	Non-conservative	0.0915324	H		SRR10523736	RESCUE+N473I	5th	0.315784	A		SRR10523736	RESCUE+N473I	5th	0.10957	A		SRR10523728	RESCUE+S375A	ClinVar	0.0378659	A		SRR10523728	RESCUE+S375A	ClinVar	0.0961522	A
SRR8908977	K20A/R21A	syn	0.079456	D		SRR11561285	BE4-AmAPOBEC1	syn	0.222945	E		SRR8908977	K20A/R21A	Conservative	0.123729	D		SRR9027800	BE3(W90Y/R126E)-site 3	Conservative	0.078484	H		SRR10523763	RESCUE+S375A	5th	0.115434	A		SRR10523763	RESCUE+S375A	5th	0.117157	A		SRR10523759	RESCUE+S375A	ClinVar	0.0341355	A		SRR10523759	RESCUE+S375A	ClinVar	0.0791488	A
SRR8908978	V82G	non-syn	0.0704781	D		SRR11561286	BE4-AmAPOBEC1	non-syn	0.073917	E		SRR8908978	V82G	Non-conservative	0.126346	D		SRR9027801	BE3(W90Y/R126E)-site 3	Non-conservative	0.0950957	H		SRR10523702	REPAIRv1(N81S)	5th	0.342961	A		SRR10523702	REPAIRv1(N81S)	5th	0.0938871	A		SRR10523737	RESCUE+S375A	ClinVar	0.00959969	A		SRR10523737	RESCUE+S375A	ClinVar	0.0447847	A
SRR8908978	V82G	syn	0.0743788	D		SRR11561286	BE4-AmAPOBEC1	syn	0.222525	E		SRR8908978	V82G	Conservative	0.115552	D		SRR9027801	BE3(W90Y/R126E)-site 3	Conservative	0.0797805	H		SRR10523744	RESCUE	5th	0.721966	A		SRR10523744	RESCUE	5th	0.17205	A		SRR10523763	RESCUE+S375A	ClinVar	0.0335697	A		SRR10523763	RESCUE+S375A	ClinVar	0.0838522	A
SRR8908980	ABEmax	non-syn	0.678406	D		SRR11561287	BE4-RrA3F	non-syn	0.070871	E		SRR8908980	ABEmax	Non-conservative	1.14934	D		SRR9027802	BE3(hA3AR128A)-site 3	Non-conservative	0.0689187	H		SRR10523745	RESCUE+N473I	5th	0.405708	A		SRR10523745	RESCUE+N473I	5th	0.127608	A		SRR10523706	RESCUE+S375A	ClinVar	0.0391147	A		SRR10523706	RESCUE+S375A	ClinVar	0.0767754	A
SRR8908980	ABEmax	syn	0.615264	D		SRR11561287	BE4-RrA3F	syn	0.230416	E		SRR8908980	ABEmax	Conservative	0.975286	D		SRR9027802	BE3(hA3AR128A)-site 3	Conservative	0.0808302	H		SRR10523766	REPAIRv1(N81S)	5th	0.304924	A		SRR10523766	REPAIRv1(N81S)	5th	0.0918733	A		SRR10523750	RESCUE+S375A	CDS	0.0986103	A		SRR10523750	RESCUE+S375A	CDS	0.0707747	A
SRR8908981	miniABEmax	non-syn	0.732108	D		SRR11561288	BE4-RrA3F	non-syn	0.0709218	E		SRR8908981	miniABEmax	Non-conservative	1.1918	D		SRR9027807	BE3(hA3AY130F)-site 3	Non-conservative	0.0438294	H		SRR10523730	RESCUE+S375N	5th	0.379641	A		SRR10523730	RESCUE+S375N	5th	0.124061	A		SRR10523746	RESCUE+S375A	CDS	0.0991191	A		SRR10523746	RESCUE+S375A	CDS	0.0764313	A
SRR8908981	miniABEmax	syn	0.667943	D		SRR11561288	BE4-RrA3F	syn	0.230863	E		SRR8908981	miniABEmax	Conservative	1.05699	D		SRR9027807	BE3(hA3AY130F)-site 3	Conservative	0.055724	H		SRR10523738	RESCUE+S375C	5th	0.190861	A		SRR10523738	RESCUE+S375C	5th	0.116286	A		SRR10523717	RESCUE+S375A	CDS	0.100813	A		SRR10523717	RESCUE+S375A	CDS	0.0737036	A
SRR8908982	K20A/R21A	non-syn	0.156204	D		SRR11561289	nCas9	non-syn	0.0681362	E		SRR8908982	K20A/R21A	Non-conservative	0.274763	D		SRR9027808	BE3(hA3AY130F)-site 3	Non-conservative	0.0446542	H		SRR10523710	REPAIRv1(X85W)	5th	0.839358	A		SRR10523710	REPAIRv1(X85W)	5th	0.0950291	A		SRR10523743	RESCUE+S375A	CDS	0.102021	A		SRR10523743	RESCUE+S375A	CDS	0.0759258	A
SRR8908982	K20A/R21A	syn	0.151104	D		SRR11561289	nCas9	syn	0.225787	E		SRR8908982	K20A/R21A	Conservative	0.251606	D		SRR9027808	BE3(hA3AY130F)-site 3	Conservative	0.0560127	H		SRR10523706	RESCUE+S375A	5th	0.115707	A		SRR10523706	RESCUE+S375A	5th	0.110824	A		SRR10523728	RESCUE+S375A	CDS	0.0886997	A		SRR10523728	RESCUE+S375A	CDS	0.0696315	A
SRR8908983	V82G	non-syn	0.101063	D		SRR11561290	BE4-RrA3F	non-syn	0.0702229	E		SRR8908983	V82G	Non-conservative	0.181262	D		SRR9027810	BE3(hA3AY130F)-site 3	Non-conservative	0.0426503	H		SRR10523719	RESCUE+S375N	5th	0.427459	A		SRR10523719	RESCUE+S375N	5th	0.12465	A		SRR10523759	RESCUE+S375A	CDS	0.0967076	A		SRR10523759	RESCUE+S375A	CDS	0.0744399	A
SRR8908983	V82G	syn	0.102483	D		SRR11561290	BE4-RrA3F	syn	0.226171	E		SRR8908983	V82G	Conservative	0.163012	D		SRR9027810	BE3(hA3AY130F)-site 3	Conservative	0.0516127	H		SRR10523753	REPAIRv1(N81S)	5th	0.314117	A		SRR10523753	REPAIRv1(N81S)	5th	0.0942629	A		SRR10523737	RESCUE+S375A	CDS	0.107813	A		SRR10523737	RESCUE+S375A	CDS	0.0731116	A
SRR8908985	ABEmax	non-syn	0.578253	D		SRR11561291	BE4-RrA3F	non-syn	0.0705698	E		SRR8908985	ABEmax	Non-conservative	0.974661	D		SRR11561274	BE4-SsAPOBEC3B	Non-conservative	0.0354679	E		SRR10523755	REPAIRv2	5th	0.108622	A		SRR10523755	REPAIRv2	5th	0.0960367	A		SRR10523763	RESCUE+S375A	CDS	0.114152	A		SRR10523763	RESCUE+S375A	CDS	0.0753583	A
SRR8908985	ABEmax	syn	0.524654	D		SRR11561291	BE4-RrA3F	syn	0.226176	E		SRR8908985	ABEmax	Conservative	0.828754	D		SRR11561274	BE4-SsAPOBEC3B	Conservative	0.035803	E		SRR10523752	RESCUE+S375N	5th	0.397464	A		SRR10523752	RESCUE+S375N	5th	0.119905	A		SRR10523706	RESCUE+S375A	CDS	0.0956673	A		SRR10523706	RESCUE+S375A	CDS	0.0724164	A
SRR8908986	miniABEmax	non-syn	0.665932	D		SRR11561292	BE4-RrA3F	non-syn	0.071262	E		SRR8908986	miniABEmax	Non-conservative	1.07775	D		SRR11561276	BE4-SsAPOBEC3B	Non-conservative	0.0351824	E		SRR10523751	RESCUE+S375C	5th	0.189804	A		SRR10523751	RESCUE+S375C	5th	0.115782	A		SRR10523729	RESCUE+S375C	Essential genes	0.113051	A		SRR10523729	RESCUE+S375C	Essential genes	0.0697742	A
SRR8908986	miniABEmax	syn	0.607411	D		SRR11561292	BE4-RrA3F	syn	0.226266	E		SRR8908986	miniABEmax	Conservative	0.95247	D		SRR11561276	BE4-SsAPOBEC3B	Conservative	0.0355693	E		SRR10523748	RESCUE+S375N	5th	0.43909	A		SRR10523748	RESCUE+S375N	5th	0.122035	A		SRR10523707	RESCUE+S375C	Essential genes	0.127385	A		SRR10523707	RESCUE+S375C	Essential genes	0.0721019	A
SRR8908987	K20A/R21A	non-syn	0.157953	D		SRR11561293	BE4-RrA3F	non-syn	0.0716715	E		SRR8908987	K20A/R21A	Non-conservative	0.287276	D		SRR11561277	BE4-SsAPOBEC3B	Non-conservative	0.0350419	E		SRR10523742	REPAIRv1(X85W)	6th	0.772684	A		SRR10523742	REPAIRv1(X85W)	6th	0.0838171	A		SRR10523707	RESCUE+S375C	Oncogenes	0.116601	A		SRR10523707	RESCUE+S375C	Oncogenes	0.0731746	A
SRR8908987	K20A/R21A	syn	0.152417	D		SRR11561293	BE4-RrA3F	syn	0.225802	E		SRR8908987	K20A/R21A	Conservative	0.262638	D		SRR11561277	BE4-SsAPOBEC3B	Conservative	0.0357427	E		SRR10523707	RESCUE+S375C	6th	0.186212	A		SRR10523707	RESCUE+S375C	6th	0.110672	A		SRR10523729	RESCUE+S375C	Oncogenes	0.111907	A		SRR10523729	RESCUE+S375C	Oncogenes	0.0706481	A
SRR8908988	V82G	non-syn	0.102204	D		SRR11561294	BE4-PpAPOBEC1-H122A	non-syn	0.0881231	E		SRR8908988	V82G	Non-conservative	0.18351	D		SRR11561279	BE4-SsAPOBEC3B	Non-conservative	0.0350125	E		SRR10523735	RESCUE	6th	0.629308	A		SRR10523735	RESCUE	6th	0.14199	A		SRR10523707	RESCUE+S375C	Oncogenes	0.116601	A		SRR10523707	RESCUE+S375C	Oncogenes	0.0731746	A
SRR8908988	V82G	syn	0.102769	D		SRR11561294	BE4-PpAPOBEC1-H122A	syn	0.242503	E		SRR8908988	V82G	Conservative	0.164842	D		SRR11561279	BE4-SsAPOBEC3B	Conservative	0.0352708	E		SRR10523750	RESCUE+S375A	6th	0.108781	A		SRR10523750	RESCUE+S375A	6th	0.106183	A		SRR10523729	RESCUE+S375C	Oncogenes	0.111907	A		SRR10523729	RESCUE+S375C	Oncogenes	0.0706481	A
SRR8908990	ABEmax	non-syn	0.421569	D		SRR11561295	BE4-PpAPOBEC1-H122A	non-syn	0.0890668	E		SRR8908990	ABEmax	Non-conservative	0.750504	D		SRR11561280	BE4-SsAPOBEC3B	Non-conservative	0.0365224	E		SRR10523739	RESCUE+S375N	6th	0.386781	A		SRR10523739	RESCUE+S375N	6th	0.110067	A		SRR10523747	RESCUE+S375C	Oncogenes	0.128943	A		SRR10523747	RESCUE+S375C	Oncogenes	0.0723691	A
SRR8908990	ABEmax	syn	0.385482	D		SRR11561295	BE4-PpAPOBEC1-H122A	syn	0.244576	E		SRR8908990	ABEmax	Conservative	0.62196	D		SRR11561280	BE4-SsAPOBEC3B	Conservative	0.0349111	E		SRR10523729	RESCUE+S375C	6th	0.170577	A		SRR10523729	RESCUE+S375C	6th	0.106278	A		SRR10523754	RESCUE+S375C	Oncogenes	0.129755	A		SRR10523754	RESCUE+S375C	Oncogenes	0.0706775	A
SRR8908991	miniABEmax	non-syn	0.423888	D		SRR11561296	BE4-PpAPOBEC1-H122A	non-syn	0.0787182	E		SRR8908991	miniABEmax	Non-conservative	0.691303	D		SRR11561281	BE4-AmAPOBEC1	Non-conservative	0.0360019	E		SRR10523732	RESCUE+N473I	6th	0.393791	A		SRR10523732	RESCUE+N473I	6th	0.113717	A		SRR10523764	RESCUE+S375C	Oncogenes	0.118937	A		SRR10523764	RESCUE+S375C	Oncogenes	0.0735703	A
SRR8908991	miniABEmax	syn	0.390908	D		SRR11561296	BE4-PpAPOBEC1-H122A	syn	0.231886	E		SRR8908991	miniABEmax	Conservative	0.614426	D		SRR11561281	BE4-AmAPOBEC1	Conservative	0.0496831	E		SRR10523726	RESCUE	6th	0.55772	A		SRR10523726	RESCUE	6th	0.135834	A		SRR10523760	RESCUE+S375C	Oncogenes	0.126294	A		SRR10523760	RESCUE+S375C	Oncogenes	0.0721643	A
SRR8908992	K20A/R21A	non-syn	0.107925	D		SRR11561297	BE4-rAPOBEC1	non-syn	0.309049	E		SRR8908992	K20A/R21A	Non-conservative	0.189644	D		SRR11561282	BE4-AmAPOBEC1	Non-conservative	0.0361225	E		SRR10523709	REPAIRv1(N81S)	6th	0.297589	A		SRR10523709	REPAIRv1(N81S)	6th	0.082779	A		SRR10523747	RESCUE+S375C	Oncogenes	0.128943	A		SRR10523747	RESCUE+S375C	Oncogenes	0.0723691	A
SRR8908992	K20A/R21A	syn	0.107896	D		SRR11561297	BE4-rAPOBEC1	syn	0.518989	E		SRR8908992	K20A/R21A	Conservative	0.173179	D		SRR11561282	BE4-AmAPOBEC1	Conservative	0.0495347	E		SRR10523723	REPAIRv1(X85W)	6th	0.89352	A		SRR10523723	REPAIRv1(X85W)	6th	0.082484	A		SRR10523754	RESCUE+S375C	Oncogenes	0.129755	A		SRR10523754	RESCUE+S375C	Oncogenes	0.0706775	A
SRR8908993	V82G	non-syn	0.0718449	D		SRR11561298	BE4-rAPOBEC1	non-syn	0.308212	E		SRR8908993	V82G	Non-conservative	0.12673	D		SRR11561283	BE4-AmAPOBEC1	Non-conservative	0.0361307	E		SRR10523714	RESCUE+N473I	6th	0.359966	A		SRR10523714	RESCUE+N473I	6th	0.104983	A		SRR10523764	RESCUE+S375C	Oncogenes	0.118937	A		SRR10523764	RESCUE+S375C	Oncogenes	0.0735703	A
SRR8908993	V82G	syn	0.0765039	D		SRR11561298	BE4-rAPOBEC1	syn	0.519105	E		SRR8908993	V82G	Conservative	0.114672	D		SRR11561283	BE4-AmAPOBEC1	Conservative	0.0498398	E		SRR10523734	REPAIRv1(X85W)	6th	0.673031	A		SRR10523734	REPAIRv1(X85W)	6th	0.0793634	A		SRR10523760	RESCUE+S375C	Oncogenes	0.126294	A		SRR10523760	RESCUE+S375C	Oncogenes	0.0721643	A
SRR8908995	ABEmax	non-syn	0.636522	D		SRR11561299	BE4-rAPOBEC1	non-syn	0.311548	E		SRR8908995	ABEmax	Non-conservative	1.07672	D		SRR11561284	BE4-AmAPOBEC1	Non-conservative	0.0362266	E		SRR10523740	REPAIRv1(N81S)	6th	0.298071	A		SRR10523740	REPAIRv1(N81S)	6th	0.0873503	A		SRR10523718	RESCUE+S375C	Oncogenes	0.120955	A		SRR10523718	RESCUE+S375C	Oncogenes	0.0757031	A
SRR8908995	ABEmax	syn	0.576639	D		SRR11561299	BE4-rAPOBEC1	syn	0.52147	E		SRR8908995	ABEmax	Conservative	0.909662	D		SRR11561284	BE4-AmAPOBEC1	Conservative	0.0497783	E		SRR10523756	REPAIRv1(X85W)	6th	0.863615	A		SRR10523756	REPAIRv1(X85W)	6th	0.083846	A		SRR10523738	RESCUE+S375C	Oncogenes	0.119955	A		SRR10523738	RESCUE+S375C	Oncogenes	0.0740598	A
SRR8908996	miniABEmax	non-syn	0.716721	D		SRR11561300	BE4-PpAPOBEC1-H122A	non-syn	0.0793583	E		SRR8908996	miniABEmax	Non-conservative	1.17793	D		SRR11561285	BE4-AmAPOBEC1	Non-conservative	0.0354153	E		SRR10523762	REPAIRv1(N81S)	6th	0.25608	A		SRR10523762	REPAIRv1(N81S)	6th	0.0835894	A		SRR10523718	RESCUE+S375C	Oncogenes	0.120955	A		SRR10523718	RESCUE+S375C	Oncogenes	0.0757031	A
SRR8908996	miniABEmax	syn	0.653373	D		SRR11561300	BE4-PpAPOBEC1-H122A	syn	0.231873	E		SRR8908996	miniABEmax	Conservative	1.05013	D		SRR11561285	BE4-AmAPOBEC1	Conservative	0.0484853	E		SRR10523711	REPAIRv2	6th	0.100224	A		SRR10523711	REPAIRv2	6th	0.0881213	A		SRR10523751	RESCUE+S375C	Oncogenes	0.11841	A		SRR10523751	RESCUE+S375C	Oncogenes	0.070537	A
SRR8908997	K20A/R21A	non-syn	0.154892	D		SRR11561301	BE4-PpAPOBEC1-H122A	non-syn	0.0875413	E		SRR8908997	K20A/R21A	Non-conservative	0.286705	D		SRR11561286	BE4-AmAPOBEC1	Non-conservative	0.035448	E		SRR10523757	RESCUE	6th	0.686156	A		SRR10523757	RESCUE	6th	0.148205	A		SRR10523738	RESCUE+S375C	Oncogenes	0.119955	A		SRR10523738	RESCUE+S375C	Oncogenes	0.0740598	A
SRR8908997	K20A/R21A	syn	0.149737	D		SRR11561301	BE4-PpAPOBEC1-H122A	syn	0.239872	E		SRR8908997	K20A/R21A	Conservative	0.259763	D		SRR11561286	BE4-AmAPOBEC1	Conservative	0.0489309	E		SRR10523705	RESCUE+N473I	6th	0.349238	A		SRR10523705	RESCUE+N473I	6th	0.10373	A		SRR10523751	RESCUE+S375C	Oncogenes	0.11841	A		SRR10523751	RESCUE+S375C	Oncogenes	0.070537	A
SRR8908998	V82G	non-syn	0.0820077	D		SRR11561302	BE4-PpAPOBEC1-H122A	non-syn	0.0875621	E		SRR8908998	V82G	Non-conservative	0.138043	D		SRR11561287	BE4-RrA3F	Non-conservative	0.0326796	E		SRR10523708	RESCUE+S375N	6th	0.393076	A		SRR10523708	RESCUE+S375N	6th	0.111453	A		SRR10523707	RESCUE+S375C	ClinVar	0.146306	A		SRR10523707	RESCUE+S375C	ClinVar	0.0701349	A
SRR8908998	V82G	syn	0.084553	D		SRR11561302	BE4-PpAPOBEC1-H122A	syn	0.240369	E		SRR8908998	V82G	Conservative	0.125501	D		SRR11561287	BE4-RrA3F	Conservative	0.030492	E		SRR10523747	RESCUE+S375C	6th	0.191055	A		SRR10523747	RESCUE+S375C	6th	0.111937	A		SRR10523729	RESCUE+S375C	ClinVar	0.093739	A		SRR10523729	RESCUE+S375C	ClinVar	0.0536903	A
SRR8909000	ABEmax	non-syn	0.678906	D		SRR11561303	nCas9	non-syn	0.0679552	E		SRR8909000	ABEmax	Non-conservative	1.14418	D		SRR11561288	BE4-RrA3F	Non-conservative	0.032465	E		SRR10523720	REPAIRv1(N81S)	6th	0.293925	A		SRR10523720	REPAIRv1(N81S)	6th	0.0849412	A		SRR10523747	RESCUE+S375C	ClinVar	0.0748895	A		SRR10523747	RESCUE+S375C	ClinVar	0.0828199	A
SRR8909000	ABEmax	syn	0.614622	D		SRR11561303	nCas9	syn	0.220073	E		SRR8909000	ABEmax	Conservative	0.963574	D		SRR11561288	BE4-RrA3F	Conservative	0.0303245	E		SRR10523716	RESCUE+N473I	6th	0.348274	A		SRR10523716	RESCUE+N473I	6th	0.107384	A		SRR10523754	RESCUE+S375C	ClinVar	0.0731911	A		SRR10523754	RESCUE+S375C	ClinVar	0.0764922	A
SRR8909001	miniABEmax	non-syn	0.778707	D		SRR11561304	BE4-PpAPOBEC1-R33A	non-syn	0.0734179	E		SRR8909001	miniABEmax	Non-conservative	1.29816	D		SRR11561289	nCas9	Non-conservative	0.032042	E		SRR10523703	REPAIRv2	6th	0.106318	A		SRR10523703	REPAIRv2	6th	0.0907205	A		SRR10523764	RESCUE+S375C	ClinVar	0.0831912	A		SRR10523764	RESCUE+S375C	ClinVar	0.0712327	A
SRR8909001	miniABEmax	syn	0.70924	D		SRR11561304	BE4-PpAPOBEC1-R33A	syn	0.229563	E		SRR8909001	miniABEmax	Conservative	1.14437	D		SRR11561289	nCas9	Conservative	0.0298241	E		SRR10523765	RESCUE+S375N	6th	0.413259	A		SRR10523765	RESCUE+S375N	6th	0.116402	A		SRR10523760	RESCUE+S375C	ClinVar	0.098131	A		SRR10523760	RESCUE+S375C	ClinVar	0.0774132	A
SRR8909002	K20A/R21A	non-syn	0.164069	D		SRR11561305	BE4-PpAPOBEC1-R33A	non-syn	0.0741333	E		SRR8909002	K20A/R21A	Non-conservative	0.288562	D		SRR11561290	BE4-RrA3F	Non-conservative	0.0325259	E		SRR10523731	REPAIRv1(N81S)	6th	0.2279	A		SRR10523731	REPAIRv1(N81S)	6th	0.0851242	A		SRR10523718	RESCUE+S375C	ClinVar	0.194715	A		SRR10523718	RESCUE+S375C	ClinVar	0.068934	A
SRR8909002	K20A/R21A	syn	0.158893	D		SRR11561305	BE4-PpAPOBEC1-R33A	syn	0.23063	E		SRR8909002	K20A/R21A	Conservative	0.262032	D		SRR11561290	BE4-RrA3F	Conservative	0.0304308	E		SRR10523754	RESCUE+S375C	6th	0.196913	A		SRR10523754	RESCUE+S375C	6th	0.113465	A		SRR10523738	RESCUE+S375C	ClinVar	0.093728	A		SRR10523738	RESCUE+S375C	ClinVar	0.0781771	A
SRR8909003	V82G	non-syn	0.0827427	D		SRR11561306	BE4-PpAPOBEC1-R33A	non-syn	0.0747006	E		SRR8909003	V82G	Non-conservative	0.147608	D		SRR11561291	BE4-RrA3F	Non-conservative	0.0327338	E		SRR10523715	RESCUE	6th	0.663441	A		SRR10523715	RESCUE	6th	0.148068	A		SRR10523751	RESCUE+S375C	ClinVar	0.0716814	A		SRR10523751	RESCUE+S375C	ClinVar	0.0816302	A
SRR8909003	V82G	syn	0.0861831	D		SRR11561306	BE4-PpAPOBEC1-R33A	syn	0.226153	E		SRR8909003	V82G	Conservative	0.133119	D		SRR11561291	BE4-RrA3F	Conservative	0.0301552	E		SRR10523701	RESCUE+S375N	6th	0.410675	A		SRR10523701	RESCUE+S375N	6th	0.11476	A		SRR10523707	RESCUE+S375C	CDS	0.17281	A		SRR10523707	RESCUE+S375C	CDS	0.0764433	A
SRR8909005	ABEmax	non-syn	0.625043	D		SRR11561307	BE4-PpAPOBEC1-R33A	non-syn	0.0742387	E		SRR8909005	ABEmax	Non-conservative	1.07803	D		SRR11561292	BE4-RrA3F	Non-conservative	0.0327213	E		SRR10523746	RESCUE+S375A	6th	0.115854	A		SRR10523746	RESCUE+S375A	6th	0.10899	A		SRR10523729	RESCUE+S375C	CDS	0.149635	A		SRR10523729	RESCUE+S375C	CDS	0.0731143	A
SRR8909005	ABEmax	syn	0.570406	D		SRR11561307	BE4-PpAPOBEC1-R33A	syn	0.225649	E		SRR8909005	ABEmax	Conservative	0.907165	D		SRR11561292	BE4-RrA3F	Conservative	0.0306661	E		SRR10523704	RESCUE	6th	0.665631	A		SRR10523704	RESCUE	6th	0.147359	A		SRR10523747	RESCUE+S375C	CDS	0.179961	A		SRR10523747	RESCUE+S375C	CDS	0.0801931	A
SRR8909006	miniABEmax	non-syn	0.648829	D		SRR11561308	BE4-PpAPOBEC1-R33A	non-syn	0.0724002	E		SRR8909006	miniABEmax	Non-conservative	1.06896	D		SRR11561293	BE4-RrA3F	Non-conservative	0.0327087	E		SRR10523724	RESCUE	6th	0.686816	A		SRR10523724	RESCUE	6th	0.15184	A		SRR10523754	RESCUE+S375C	CDS	0.185971	A		SRR10523754	RESCUE+S375C	CDS	0.079941	A
SRR8909006	miniABEmax	syn	0.596154	D		SRR11561308	BE4-PpAPOBEC1-R33A	syn	0.230714	E		SRR8909006	miniABEmax	Conservative	0.950248	D		SRR11561293	BE4-RrA3F	Conservative	0.0305819	E		SRR10523764	RESCUE+S375C	6th	0.179422	A		SRR10523764	RESCUE+S375C	6th	0.109562	A		SRR10523764	RESCUE+S375C	CDS	0.175844	A		SRR10523764	RESCUE+S375C	CDS	0.0767816	A
SRR8909007	K20A/R21A	non-syn	0.125822	D		SRR11561309	BE4-PpAPOBEC1-R33A	non-syn	0.0732173	E		SRR8909007	K20A/R21A	Non-conservative	0.219007	D		SRR11561294	BE4-PpAPOBEC1-H122A	Non-conservative	0.0429091	E		SRR10523760	RESCUE+S375C	6th	0.194723	A		SRR10523760	RESCUE+S375C	6th	0.10998	A		SRR10523760	RESCUE+S375C	CDS	0.178894	A		SRR10523760	RESCUE+S375C	CDS	0.0791334	A
SRR8909007	K20A/R21A	syn	0.124983	D		SRR11561309	BE4-PpAPOBEC1-R33A	syn	0.23138	E		SRR8909007	K20A/R21A	Conservative	0.19977	D		SRR11561294	BE4-PpAPOBEC1-H122A	Conservative	0.114257	E		SRR10523749	REPAIRv1(N81S)	6th	0.284817	A		SRR10523749	REPAIRv1(N81S)	6th	0.0845513	A		SRR10523718	RESCUE+S375C	CDS	0.176324	A		SRR10523718	RESCUE+S375C	CDS	0.0779119	A
SRR8909008	V82G	non-syn	0.0746428	D		SRR11561310	BE4-PpAPOBEC1	non-syn	0.0841947	E		SRR8909008	V82G	Non-conservative	0.132124	D		SRR11561295	BE4-PpAPOBEC1-H122A	Non-conservative	0.0427745	E		SRR10523717	RESCUE+S375A	6th	0.113233	A		SRR10523717	RESCUE+S375A	6th	0.110171	A		SRR10523738	RESCUE+S375C	CDS	0.168429	A		SRR10523738	RESCUE+S375C	CDS	0.0762484	A
SRR8909008	V82G	syn	0.0784965	D		SRR11561310	BE4-PpAPOBEC1	syn	0.239354	E		SRR8909008	V82G	Conservative	0.119715	D		SRR11561295	BE4-PpAPOBEC1-H122A	Conservative	0.115412	E		SRR10523761	RESCUE+S375N	6th	0.387201	A		SRR10523761	RESCUE+S375N	6th	0.113106	A		SRR10523751	RESCUE+S375C	CDS	0.172108	A		SRR10523751	RESCUE+S375C	CDS	0.0757391	A
SRR8909009	GFP	non-syn	0.0140624	D		SRR11561311	BE4-PpAPOBEC1	non-syn	0.0838131	E		SRR8909009	GFP	Non-conservative	0.0187022	D		SRR11561296	BE4-PpAPOBEC1-H122A	Non-conservative	0.0386686	E		SRR10523733	REPAIRv2	6th	0.0967563	A		SRR10523733	REPAIRv2	6th	0.0849334	A		SRR10523739	RESCUE+S375N	Essential genes	0.323576	A		SRR10523739	RESCUE+S375N	Essential genes	0.0768257	A
SRR8909009	GFP	syn	0.0229632	D		SRR11561311	BE4-PpAPOBEC1	syn	0.239551	E		SRR8909009	GFP	Conservative	0.02389	D		SRR11561296	BE4-PpAPOBEC1-H122A	Conservative	0.0689539	E		SRR10523712	REPAIRv1(X85W)	6th	0.847279	A		SRR10523712	REPAIRv1(X85W)	6th	0.0822657	A		SRR10523739	RESCUE+S375N	Oncogenes	0.28291	A		SRR10523739	RESCUE+S375N	Oncogenes	0.0777018	A
SRR8909011	ABEmax	non-syn	0.604715	D		SRR11561312	BE4-PpAPOBEC1	non-syn	0.0845759	E		SRR8909011	ABEmax	Non-conservative	1.01683	D		SRR11561297	BE4-rAPOBEC1	Non-conservative	0.458099	E		SRR10523741	REPAIRv2	6th	0.101756	A		SRR10523741	REPAIRv2	6th	0.0843838	A		SRR10523708	RESCUE+S375N	Oncogenes	0.300612	A		SRR10523708	RESCUE+S375N	Oncogenes	0.0757557	A
SRR8909011	ABEmax	syn	0.552918	D		SRR11561312	BE4-PpAPOBEC1	syn	0.238363	E		SRR8909011	ABEmax	Conservative	0.852915	D		SRR11561297	BE4-rAPOBEC1	Conservative	0.312121	E		SRR10523743	RESCUE+S375A	6th	0.116659	A		SRR10523743	RESCUE+S375A	6th	0.114351	A		SRR10523739	RESCUE+S375N	Oncogenes	0.28291	A		SRR10523739	RESCUE+S375N	Oncogenes	0.0777018	A
SRR8909012	miniABEmax	non-syn	0.500803	D		SRR11561313	BE4-PpAPOBEC1	non-syn	0.0853553	E		SRR8909012	miniABEmax	Non-conservative	0.828924	D		SRR11561298	BE4-rAPOBEC1	Non-conservative	0.749354	E		SRR10523722	REPAIRv2	6th	0.100001	A		SRR10523722	REPAIRv2	6th	0.0864414	A		SRR10523765	RESCUE+S375N	Oncogenes	0.306375	A		SRR10523765	RESCUE+S375N	Oncogenes	0.0754821	A
SRR8909012	miniABEmax	syn	0.460954	D		SRR11561313	BE4-PpAPOBEC1	syn	0.238508	E		SRR8909012	miniABEmax	Conservative	0.739276	D		SRR11561298	BE4-rAPOBEC1	Conservative	0.312057	E		SRR10523713	RESCUE	6th	0.649957	A		SRR10523713	RESCUE	6th	0.14848	A		SRR10523701	RESCUE+S375N	Oncogenes	0.305407	A		SRR10523701	RESCUE+S375N	Oncogenes	0.0768522	A
SRR8909013	K20A/R21A	non-syn	0.135234	D		SRR11561314	nCas9	non-syn	0.0685482	E		SRR8909013	K20A/R21A	Non-conservative	0.24769	D		SRR11561299	BE4-rAPOBEC1	Non-conservative	0.760147	E		SRR10523728	RESCUE+S375A	6th	0.104979	A		SRR10523728	RESCUE+S375A	6th	0.104974	A		SRR10523708	RESCUE+S375N	Oncogenes	0.300612	A		SRR10523708	RESCUE+S375N	Oncogenes	0.0757557	A
SRR8909013	K20A/R21A	syn	0.133838	D		SRR11561314	nCas9	syn	0.220377	E		SRR8909013	K20A/R21A	Conservative	0.224162	D		SRR11561299	BE4-rAPOBEC1	Conservative	0.318768	E		SRR10523721	RESCUE	6th	0.682271	A		SRR10523721	RESCUE	6th	0.153295	A		SRR10523761	RESCUE+S375N	Oncogenes	0.287931	A		SRR10523761	RESCUE+S375N	Oncogenes	0.0757165	A
SRR8909014	V82G	non-syn	0.0810275	D		SRR11561315	BE4-PpAPOBEC1	non-syn	0.082767	E		SRR8909014	V82G	Non-conservative	0.15085	D		SRR11561300	BE4-PpAPOBEC1-H122A	Non-conservative	0.0386886	E		SRR10523727	RESCUE+N473I	6th	0.305367	A		SRR10523727	RESCUE+N473I	6th	0.107069	A		SRR10523765	RESCUE+S375N	Oncogenes	0.306375	A		SRR10523765	RESCUE+S375N	Oncogenes	0.0754821	A
SRR8909014	V82G	syn	0.0841286	D		SRR11561315	BE4-PpAPOBEC1	syn	0.238071	E		SRR8909014	V82G	Conservative	0.136722	D		SRR11561300	BE4-PpAPOBEC1-H122A	Conservative	0.0687856	E		SRR10523725	RESCUE+N473I	6th	0.363059	A		SRR10523725	RESCUE+N473I	6th	0.111046	A		SRR10523701	RESCUE+S375N	Oncogenes	0.305407	A		SRR10523701	RESCUE+S375N	Oncogenes	0.0768522	A
SRR8909015	GFP	non-syn	0.0149239	D		SRR11561316	BE4-PpAPOBEC1	non-syn	0.083531	E		SRR8909015	GFP	Non-conservative	0.0213933	D		SRR11561301	BE4-PpAPOBEC1-H122A	Non-conservative	0.0435566	E		SRR10523759	RESCUE+S375A	6th	0.11356	A		SRR10523759	RESCUE+S375A	6th	0.105569	A		SRR10523761	RESCUE+S375N	Oncogenes	0.287931	A		SRR10523761	RESCUE+S375N	Oncogenes	0.0757165	A
SRR8909015	GFP	syn	0.0246641	D		SRR11561316	BE4-PpAPOBEC1	syn	0.238651	E		SRR8909015	GFP	Conservative	0.026628	D		SRR11561301	BE4-PpAPOBEC1-H122A	Conservative	0.127703	E		SRR10523718	RESCUE+S375C	6th	0.184931	A		SRR10523718	RESCUE+S375C	6th	0.109611	A		SRR10523730	RESCUE+S375N	Oncogenes	0.269115	A		SRR10523730	RESCUE+S375N	Oncogenes	0.0751682	A
SRR8909017	ABEmax	non-syn	0.610847	D		SRR11561317	BE4-rAPOBEC1-K34A-H122A	non-syn	0.074404	E		SRR8909017	ABEmax	Non-conservative	1.03112	D		SRR11561302	BE4-PpAPOBEC1-H122A	Non-conservative	0.0417142	E		SRR10523737	RESCUE+S375A	6th	0.110017	A		SRR10523737	RESCUE+S375A	6th	0.108919	A		SRR10523719	RESCUE+S375N	Oncogenes	0.307472	A		SRR10523719	RESCUE+S375N	Oncogenes	0.0786151	A
SRR8909017	ABEmax	syn	0.558254	D		SRR11561317	BE4-rAPOBEC1-K34A-H122A	syn	0.223957	E		SRR8909017	ABEmax	Conservative	0.868127	D		SRR11561302	BE4-PpAPOBEC1-H122A	Conservative	0.12793	E		SRR10523758	RESCUE+N473I	6th	0.353756	A		SRR10523758	RESCUE+N473I	6th	0.106555	A		SRR10523752	RESCUE+S375N	Oncogenes	0.294581	A		SRR10523752	RESCUE+S375N	Oncogenes	0.0763663	A
SRR8909018	miniABEmax	non-syn	0.585467	D		SRR11561318	BE4-rAPOBEC1-K34A-H122A	non-syn	0.0746008	E		SRR8909018	miniABEmax	Non-conservative	0.956035	D		SRR11561303	nCas9	Non-conservative	0.0322872	E		SRR10523763	RESCUE+S375A	6th	0.111048	A		SRR10523763	RESCUE+S375A	6th	0.111662	A		SRR10523748	RESCUE+S375N	Oncogenes	0.311359	A		SRR10523748	RESCUE+S375N	Oncogenes	0.0773332	A
SRR8909018	miniABEmax	syn	0.538387	D		SRR11561318	BE4-rAPOBEC1-K34A-H122A	syn	0.224372	E		SRR8909018	miniABEmax	Conservative	0.847995	D		SRR11561303	nCas9	Conservative	0.0302097	E		SRR10523736	RESCUE+N473I	6th	0.300793	A		SRR10523736	RESCUE+N473I	6th	0.101905	A		SRR10523730	RESCUE+S375N	Oncogenes	0.269115	A		SRR10523730	RESCUE+S375N	Oncogenes	0.0751682	A
SRR8909019	K20A/R21A	non-syn	0.145511	D		SRR11561319	BE4-rAPOBEC1-K34A-H122A	non-syn	0.0783077	E		SRR8909019	K20A/R21A	Non-conservative	0.246522	D		SRR11561304	BE4-PpAPOBEC1-R33A	Non-conservative	0.0342276	E		SRR10523702	REPAIRv1(N81S)	6th	0.32722	A		SRR10523702	REPAIRv1(N81S)	6th	0.0884436	A		SRR10523719	RESCUE+S375N	Oncogenes	0.307472	A		SRR10523719	RESCUE+S375N	Oncogenes	0.0786151	A
SRR8909019	K20A/R21A	syn	0.142752	D		SRR11561319	BE4-rAPOBEC1-K34A-H122A	syn	0.229431	E		SRR8909019	K20A/R21A	Conservative	0.22503	D		SRR11561304	BE4-PpAPOBEC1-R33A	Conservative	0.0322353	E		SRR10523744	RESCUE	6th	0.707959	A		SRR10523744	RESCUE	6th	0.152326	A		SRR10523752	RESCUE+S375N	Oncogenes	0.294581	A		SRR10523752	RESCUE+S375N	Oncogenes	0.0763663	A
SRR8909020	V82G	non-syn	0.0864228	D		SRR11561320	BE4-rAPOBEC1-K34A-H122A	non-syn	0.0783175	E		SRR8909020	V82G	Non-conservative	0.164588	D		SRR11561305	BE4-PpAPOBEC1-R33A	Non-conservative	0.0346293	E		SRR10523745	RESCUE+N473I	6th	0.395613	A		SRR10523745	RESCUE+N473I	6th	0.113256	A		SRR10523748	RESCUE+S375N	Oncogenes	0.311359	A		SRR10523748	RESCUE+S375N	Oncogenes	0.0773332	A
SRR8909020	V82G	syn	0.0900835	D		SRR11561320	BE4-rAPOBEC1-K34A-H122A	syn	0.229495	E		SRR8909020	V82G	Conservative	0.147231	D		SRR11561305	BE4-PpAPOBEC1-R33A	Conservative	0.032478	E		SRR10523766	REPAIRv1(N81S)	6th	0.288857	A		SRR10523766	REPAIRv1(N81S)	6th	0.0854057	A		SRR10523739	RESCUE+S375N	ClinVar	0.20662	A		SRR10523739	RESCUE+S375N	ClinVar	0.0896775	A
SRR8909021	GFP	non-syn	0.0142924	D		SRR11561321	BE4-rAPOBEC1-K34A-H122A	non-syn	0.0775502	E		SRR8909021	GFP	Non-conservative	0.0192563	D		SRR11561306	BE4-PpAPOBEC1-R33A	Non-conservative	0.0342435	E		SRR10523738	RESCUE+S375C	6th	0.178676	A		SRR10523738	RESCUE+S375C	6th	0.107818	A		SRR10523708	RESCUE+S375N	ClinVar	0.187478	A		SRR10523708	RESCUE+S375N	ClinVar	0.0670691	A
SRR8909021	GFP	syn	0.0240647	D		SRR11561321	BE4-rAPOBEC1-K34A-H122A	syn	0.230219	E		SRR8909021	GFP	Conservative	0.0243954	D		SRR11561306	BE4-PpAPOBEC1-R33A	Conservative	0.0328004	E		SRR10523730	RESCUE+S375N	6th	0.3579	A		SRR10523730	RESCUE+S375N	6th	0.109147	A		SRR10523765	RESCUE+S375N	ClinVar	0.287929	A		SRR10523765	RESCUE+S375N	ClinVar	0.0844085	A
SRR8910104	GFP	non-syn	0.0224862	D		SRR11561322	BE4-rAPOBEC1-K34A-H122A	non-syn	0.0769577	E		SRR8910104	GFP	Non-conservative	0.0267094	D		SRR11561307	BE4-PpAPOBEC1-R33A	Non-conservative	0.03441	E		SRR10523710	REPAIRv1(X85W)	6th	0.829416	A		SRR10523710	REPAIRv1(X85W)	6th	0.0889494	A		SRR10523701	RESCUE+S375N	ClinVar	0.279342	A		SRR10523701	RESCUE+S375N	ClinVar	0.0893528	A
SRR8910104	GFP	syn	0.0420986	D		SRR11561322	BE4-rAPOBEC1-K34A-H122A	syn	0.229385	E		SRR8910104	GFP	Conservative	0.0552717	D		SRR11561307	BE4-PpAPOBEC1-R33A	Conservative	0.0328552	E		SRR10523706	RESCUE+S375A	6th	0.109422	A		SRR10523706	RESCUE+S375A	6th	0.10311	A		SRR10523761	RESCUE+S375N	ClinVar	0.220507	A		SRR10523761	RESCUE+S375N	ClinVar	0.0833669	A
SRR6951146	ctrl	non-syn	0.0304269	F		SRR11561323	BE4-rAPOBEC1	non-syn	0.315896	E		SRR6951146	ctrl	Non-conservative	0.0281363	F		SRR11561308	BE4-PpAPOBEC1-R33A	Non-conservative	0.0341034	E		SRR10523753	REPAIRv1(N81S)	6th	0.29902	A		SRR10523753	REPAIRv1(N81S)	6th	0.0866233	A		SRR10523730	RESCUE+S375N	ClinVar	0.185881	A		SRR10523730	RESCUE+S375N	ClinVar	0.066978	A
SRR6951146	ctrl	syn	0.038828	F		SRR11561323	BE4-rAPOBEC1	syn	0.531868	E		SRR6951146	ctrl	Conservative	0.0390763	F		SRR11561308	BE4-PpAPOBEC1-R33A	Conservative	0.0326331	E		SRR10523719	RESCUE+S375N	6th	0.411808	A		SRR10523719	RESCUE+S375N	6th	0.11533	A		SRR10523719	RESCUE+S375N	ClinVar	0.298149	A		SRR10523719	RESCUE+S375N	ClinVar	0.0725322	A
SRR6951147	ctrl	non-syn	0.0390009	F		SRR11561324	BE4-rAPOBEC1	non-syn	0.3177	E		SRR6951147	ctrl	Non-conservative	0.0326858	F		SRR11561309	BE4-PpAPOBEC1-R33A	Non-conservative	0.035652	E		SRR10523752	RESCUE+S375N	6th	0.380765	A		SRR10523752	RESCUE+S375N	6th	0.112908	A		SRR10523752	RESCUE+S375N	ClinVar	0.27556	A		SRR10523752	RESCUE+S375N	ClinVar	0.0826022	A
SRR6951147	ctrl	syn	0.0483287	F		SRR11561324	BE4-rAPOBEC1	syn	0.532978	E		SRR6951147	ctrl	Conservative	0.0414476	F		SRR11561309	BE4-PpAPOBEC1-R33A	Conservative	0.0327686	E		SRR10523755	REPAIRv2	6th	0.101134	A		SRR10523755	REPAIRv2	6th	0.0878249	A		SRR10523748	RESCUE+S375N	ClinVar	0.39164	A		SRR10523748	RESCUE+S375N	ClinVar	0.0886926	A
SRR6951148	SA1+gRNA	non-syn	0.0407477	F		SRR11561325	nCas9	non-syn	0.0680725	E		SRR6951148	SA1+gRNA	Non-conservative	0.0350191	F		SRR11561310	BE4-PpAPOBEC1	Non-conservative	0.0435313	E		SRR10523748	RESCUE+S375N	6th	0.41717	A		SRR10523748	RESCUE+S375N	6th	0.116856	A		SRR10523739	RESCUE+S375N	CDS	0.38028	A		SRR10523739	RESCUE+S375N	CDS	0.0804287	A
SRR6951148	SA1+gRNA	syn	0.0495763	F		SRR11561325	nCas9	syn	0.221134	E		SRR6951148	SA1+gRNA	Conservative	0.0443589	F		SRR11561310	BE4-PpAPOBEC1	Conservative	0.0460717	E		SRR10523751	RESCUE+S375C	6th	0.181964	A		SRR10523751	RESCUE+S375C	6th	0.108988	A		SRR10523708	RESCUE+S375N	CDS	0.388128	A		SRR10523708	RESCUE+S375N	CDS	0.0803263	A
SRR6951149	SA1+gRNA	non-syn	0.0390387	F		SRR11561326	nCas9	non-syn	0.068332	E		SRR6951149	SA1+gRNA	Non-conservative	0.0340204	F		SRR11561311	BE4-PpAPOBEC1	Non-conservative	0.0432827	E		SRR10523742	REPAIRv1(X85W)	7th	0.794523	A		SRR10523742	REPAIRv1(X85W)	7th	0.0837534	A		SRR10523765	RESCUE+S375N	CDS	0.40662	A		SRR10523765	RESCUE+S375N	CDS	0.0824092	A
SRR6951149	SA1+gRNA	syn	0.0478759	F		SRR11561326	nCas9	syn	0.220946	E		SRR6951149	SA1+gRNA	Conservative	0.0442673	F		SRR11561311	BE4-PpAPOBEC1	Conservative	0.0457318	E		SRR10523707	RESCUE+S375C	7th	0.193339	A		SRR10523707	RESCUE+S375C	7th	0.111182	A		SRR10523701	RESCUE+S375N	CDS	0.412734	A		SRR10523701	RESCUE+S375N	CDS	0.0829612	A
SRR6951150	SA2+gRNA	non-syn	0.0400268	F		SRR8790747	BE3-site 3	non-syn	0.071941	H		SRR6951150	SA2+gRNA	Non-conservative	0.0359271	F		SRR11561312	BE4-PpAPOBEC1	Non-conservative	0.0432545	E		SRR10523750	RESCUE+S375A	7th	0.117762	A		SRR10523750	RESCUE+S375A	7th	0.107216	A		SRR10523761	RESCUE+S375N	CDS	0.376354	A		SRR10523761	RESCUE+S375N	CDS	0.0811069	A
SRR6951150	SA2+gRNA	syn	0.0492884	F		SRR8790747	BE3-site 3	syn	0.090874	H		SRR6951150	SA2+gRNA	Conservative	0.0435689	F		SRR11561312	BE4-PpAPOBEC1	Conservative	0.0455205	E		SRR10523735	RESCUE	7th	0.657543	A		SRR10523735	RESCUE	7th	0.149294	A		SRR10523730	RESCUE+S375N	CDS	0.346061	A		SRR10523730	RESCUE+S375N	CDS	0.0768331	A
SRR6951151	SA2+gRNA	non-syn	0.0411415	F		SRR8790748	BE3(W90A)-site 3	non-syn	0.0195898	H		SRR6951151	SA2+gRNA	Non-conservative	0.0361124	F		SRR11561313	BE4-PpAPOBEC1	Non-conservative	0.0433676	E		SRR10523739	RESCUE+S375N	7th	0.403152	A		SRR10523739	RESCUE+S375N	7th	0.112318	A		SRR10523719	RESCUE+S375N	CDS	0.403376	A		SRR10523719	RESCUE+S375N	CDS	0.082945	A
SRR6951151	SA2+gRNA	syn	0.0503161	F		SRR8790748	BE3(W90A)-site 3	syn	0.0326335	H		SRR6951151	SA2+gRNA	Conservative	0.0444387	F		SRR11561313	BE4-PpAPOBEC1	Conservative	0.0456297	E		SRR10523729	RESCUE+S375C	7th	0.180568	A		SRR10523729	RESCUE+S375C	7th	0.107851	A		SRR10523752	RESCUE+S375N	CDS	0.377346	A		SRR10523752	RESCUE+S375N	CDS	0.0799893	A
SRR6951152	SA1Q	non-syn	0.0679513	F		SRR8790749	BE3(W90A)-site 3	non-syn	0.0194127	H		SRR6951152	SA1Q	Non-conservative	0.0752452	F		SRR11561314	nCas9	Non-conservative	0.0321967	E		SRR10523726	RESCUE	7th	0.574343	A		SRR10523726	RESCUE	7th	0.141123	A		SRR10523748	RESCUE+S375N	CDS	0.41455	A		SRR10523748	RESCUE+S375N	CDS	0.0849067	A
SRR6951152	SA1Q	syn	0.0756074	F		SRR8790749	BE3(W90A)-site 3	syn	0.0314869	H		SRR6951152	SA1Q	Conservative	0.0827575	F		SRR11561314	nCas9	Conservative	0.0301224	E		SRR10523709	REPAIRv1(N81S)	7th	0.308902	A		SRR10523709	REPAIRv1(N81S)	7th	0.0822309	A		SRR6686539	2BoxB-4LN-DD	Essential genes	0.294554	B		SRR8910098	eA3A-BE3	Essential genes	0.0354992	D
SRR6951153	SA1Q	non-syn	0.0734211	F		SRR8790752	APOBEC1	non-syn	0.281943	H		SRR6951153	SA1Q	Non-conservative	0.0839087	F		SRR11561315	BE4-PpAPOBEC1	Non-conservative	0.0424277	E		SRR10523732	RESCUE+N473I	7th	0.405755	A		SRR10523732	RESCUE+N473I	7th	0.114626	A		SRR6686539	2BoxB-4LN-DD	Oncogenes	0.308724	B		SRR8910102	eA3A-BE3	Essential genes	0.036645	D
SRR6951153	SA1Q	syn	0.0811874	F		SRR8790752	APOBEC1	syn	0.326807	H		SRR6951153	SA1Q	Conservative	0.0904768	F		SRR11561315	BE4-PpAPOBEC1	Conservative	0.0449808	E		SRR10523723	REPAIRv1(X85W)	7th	0.91669	A		SRR10523723	REPAIRv1(X85W)	7th	0.0815804	A		SRR6686539	2BoxB-4LN-DD	ClinVar	0.24054	B		SRR8910094	eA3A-BE3	Essential genes	0.0349272	D
SRR6951154	SA2Q	non-syn	0.0781009	F		SRR8790754	APOBEC1	non-syn	0.296279	H		SRR6951154	SA2Q	Non-conservative	0.0930577	F		SRR11561316	BE4-PpAPOBEC1	Non-conservative	0.0426433	E		SRR10523714	RESCUE+N473I	7th	0.371325	A		SRR10523714	RESCUE+N473I	7th	0.10751	A		SRR6686539	2BoxB-4LN-DD	CDS	0.374852	B		SRR8910098	eA3A-BE3	Oncogenes	0.0891716	D
SRR6951154	SA2Q	syn	0.0852691	F		SRR8790754	APOBEC1	syn	0.342927	H		SRR6951154	SA2Q	Conservative	0.0948596	F		SRR11561316	BE4-PpAPOBEC1	Conservative	0.0445087	E		SRR10523734	REPAIRv1(X85W)	7th	0.694854	A		SRR10523734	REPAIRv1(X85W)	7th	0.0814844	A		SRR6686537	2BoxB-4LN-DD E488Q	Essential genes	0.744159	B		SRR8910102	eA3A-BE3	Oncogenes	0.0844539	D
SRR6951155	SA2Q	non-syn	0.0795594	F		SRR8790755	APOBEC1	non-syn	0.309714	H		SRR6951155	SA2Q	Non-conservative	0.0951898	F		SRR11561317	BE4-rAPOBEC1-K34A-H122A	Non-conservative	0.035815	E		SRR10523762	REPAIRv1(N81S)	7th	0.268848	A		SRR10523762	REPAIRv1(N81S)	7th	0.0826539	A		SRR6686537	2BoxB-4LN-DD E488Q	Oncogenes	0.787896	B		SRR8910094	eA3A-BE3	Oncogenes	0.0807509	D
SRR6951155	SA2Q	syn	0.0867397	F		SRR8790755	APOBEC1	syn	0.356593	H		SRR6951155	SA2Q	Conservative	0.0982628	F		SRR11561317	BE4-rAPOBEC1-K34A-H122A	Conservative	0.0511751	E		SRR10523756	REPAIRv1(X85W)	7th	0.889785	A		SRR10523756	REPAIRv1(X85W)	7th	0.0858785	A		SRR6686537	2BoxB-4LN-DD E488Q	ClinVar	0.724376	B		SRR8910098	eA3A-BE3	ClinVar	0.0287793	D
SRR6951156	SA1Q+gRNA	non-syn	0.0723614	F		SRR8790756	GFP	non-syn	0.020529	H		SRR6951156	SA1Q+gRNA	Non-conservative	0.0854663	F		SRR11561318	BE4-rAPOBEC1-K34A-H122A	Non-conservative	0.0356656	E		SRR10523740	REPAIRv1(N81S)	7th	0.308777	A		SRR10523740	REPAIRv1(N81S)	7th	0.0879041	A		SRR6686537	2BoxB-4LN-DD E488Q	CDS	0.930249	B		SRR8910102	eA3A-BE3	ClinVar	0.0302669	D
SRR6951156	SA1Q+gRNA	syn	0.0794394	F		SRR8790756	GFP	syn	0.0344295	H		SRR6951156	SA1Q+gRNA	Conservative	0.0938402	F		SRR11561318	BE4-rAPOBEC1-K34A-H122A	Conservative	0.0513051	E		SRR10523711	REPAIRv2	7th	0.106038	A		SRR10523711	REPAIRv2	7th	0.0878676	A		SRR6686542	2BoxB-4LN-DD E488Q NLS	Essential genes	0.307874	B		SRR8910094	eA3A-BE3	ClinVar	0.0292754	D
SRR6951157	SA1Q+gRNA	non-syn	0.0729225	F		SRR8790757	GFP	non-syn	0.0209689	H		SRR6951157	SA1Q+gRNA	Non-conservative	0.0756241	F		SRR11561319	BE4-rAPOBEC1-K34A-H122A	Non-conservative	0.0366515	E		SRR10523757	RESCUE	7th	0.710407	A		SRR10523757	RESCUE	7th	0.153717	A		SRR6686542	2BoxB-4LN-DD E488Q NLS	Oncogenes	0.361548	B		SRR8910098	eA3A-BE3	CDS	0.0426331	D
SRR6951157	SA1Q+gRNA	syn	0.080691	F		SRR8790757	GFP	syn	0.0340512	H		SRR6951157	SA1Q+gRNA	Conservative	0.0832016	F		SRR11561319	BE4-rAPOBEC1-K34A-H122A	Conservative	0.0561655	E		SRR10523708	RESCUE+S375N	7th	0.411597	A		SRR10523708	RESCUE+S375N	7th	0.113541	A		SRR6686542	2BoxB-4LN-DD E488Q NLS	ClinVar	0.310281	B		SRR8910102	eA3A-BE3	CDS	0.0438735	D
SRR6951158	SA2Q+gRNA	non-syn	0.078084	F		SRR8790758	BE3-site 3	non-syn	0.0727322	H		SRR6951158	SA2Q+gRNA	Non-conservative	0.0878266	F		SRR11561320	BE4-rAPOBEC1-K34A-H122A	Non-conservative	0.0365199	E		SRR10523705	RESCUE+N473I	7th	0.362517	A		SRR10523705	RESCUE+N473I	7th	0.107724	A		SRR6686542	2BoxB-4LN-DD E488Q NLS	CDS	0.474948	B		SRR8910094	eA3A-BE3	CDS	0.0413191	D
SRR6951158	SA2Q+gRNA	syn	0.0849503	F		SRR8790758	BE3-site 3	syn	0.0919426	H		SRR6951158	SA2Q+gRNA	Conservative	0.0890799	F		SRR11561320	BE4-rAPOBEC1-K34A-H122A	Conservative	0.0560923	E		SRR10523747	RESCUE+S375C	7th	0.203855	A		SRR10523747	RESCUE+S375C	7th	0.113466	A		SRR6686536	2BoxB-4LN-DD NLS	Essential genes	0.114237	B		SRR8909015	GFP	Essential genes	0.0298304	D
SRR6951159	SA2Q+gRNA	non-syn	0.078589	F		SRR8790759	BE3-RNF2	non-syn	0.0934687	H		SRR6951159	SA2Q+gRNA	Non-conservative	0.0894532	F		SRR11561321	BE4-rAPOBEC1-K34A-H122A	Non-conservative	0.0370497	E		SRR10523720	REPAIRv1(N81S)	7th	0.309317	A		SRR10523720	REPAIRv1(N81S)	7th	0.0857938	A		SRR6686536	2BoxB-4LN-DD NLS	Oncogenes	0.13847	B		SRR8909009	GFP	Essential genes	0.0286633	D
SRR6951159	SA2Q+gRNA	syn	0.0854847	F		SRR8790759	BE3-RNF2	syn	0.114302	H		SRR6951159	SA2Q+gRNA	Conservative	0.0904108	F		SRR11561321	BE4-rAPOBEC1-K34A-H122A	Conservative	0.057053	E		SRR10523716	RESCUE+N473I	7th	0.368112	A		SRR10523716	RESCUE+N473I	7th	0.109298	A		SRR6686536	2BoxB-4LN-DD NLS	ClinVar	0.0945616	B		SRR8910104	GFP	Essential genes	0.0363579	D
SRR8326916	293T	non-syn	0.0467482	G		SRR8790760	BE3-RNF2	non-syn	0.0825052	H		SRR8326916	293T	Non-conservative	0.0680015	G		SRR11561322	BE4-rAPOBEC1-K34A-H122A	Non-conservative	0.0370159	E		SRR10523703	REPAIRv2	7th	0.108345	A		SRR10523703	REPAIRv2	7th	0.0885457	A		SRR6686536	2BoxB-4LN-DD NLS	CDS	0.165155	B		SRR8909021	GFP	Essential genes	0.0289072	D
SRR8326916	293T	syn	0.0535363	G		SRR8790760	BE3-RNF2	syn	0.102847	H		SRR8326916	293T	Conservative	0.0591181	G		SRR11561322	BE4-rAPOBEC1-K34A-H122A	Conservative	0.0574341	E		SRR10523765	RESCUE+S375N	7th	0.428378	A		SRR10523765	RESCUE+S375N	7th	0.118165	A		SRR6686543	2BoxB-No enzyme	Essential genes	0.0191844	B		SRR8909015	GFP	Oncogenes	0.0266046	D
SRR8326918	MCP-ADAR1 DD-NES - MS2 adRNA	non-syn	0.78286	G		SRR8790761	BE3-RNF2	non-syn	0.0904057	H		SRR8326918	MCP-ADAR1 DD-NES - MS2 adRNA	Non-conservative	1.27443	G		SRR11561323	BE4-rAPOBEC1	Non-conservative	0.477692	E		SRR10523731	REPAIRv1(N81S)	7th	0.23539	A		SRR10523731	REPAIRv1(N81S)	7th	0.0862518	A		SRR6686543	2BoxB-No enzyme	Oncogenes	0.0198376	B		SRR8909009	GFP	Oncogenes	0.0262987	D
SRR8326918	MCP-ADAR1 DD-NES - MS2 adRNA	syn	0.768711	G		SRR8790761	BE3-RNF2	syn	0.112	H		SRR8326918	MCP-ADAR1 DD-NES - MS2 adRNA	Conservative	1.24065	G		SRR11561323	BE4-rAPOBEC1	Conservative	0.325306	E		SRR10523754	RESCUE+S375C	7th	0.207126	A		SRR10523754	RESCUE+S375C	7th	0.115721	A		SRR6686543	2BoxB-No enzyme	ClinVar	0.00926547	B		SRR8910104	GFP	Oncogenes	0.0284815	D
SRR8326919	MCP-ADAR1 DD-NES + MS2 adRNA	non-syn	0.71578	G		SRR8790768	BE3(hA3A)-site 3	non-syn	0.0542162	H		SRR8326919	MCP-ADAR1 DD-NES + MS2 adRNA	Non-conservative	1.0514	G		SRR11561324	BE4-rAPOBEC1	Non-conservative	0.478051	E		SRR10523715	RESCUE	7th	0.6868	A		SRR10523715	RESCUE	7th	0.151115	A		SRR6686543	2BoxB-No enzyme	CDS	0.0195618	B		SRR8909021	GFP	Oncogenes	0.0262203	D
SRR8326919	MCP-ADAR1 DD-NES + MS2 adRNA	syn	0.704201	G		SRR8790768	BE3(hA3A)-site 3	syn	0.0808557	H		SRR8326919	MCP-ADAR1 DD-NES + MS2 adRNA	Conservative	1.03321	G		SRR11561324	BE4-rAPOBEC1	Conservative	0.325681	E		SRR10523701	RESCUE+S375N	7th	0.426018	A		SRR10523701	RESCUE+S375N	7th	0.116103	A		SRR6686541	No guide-4LN-DD E488Q NLS	Essential genes	0.145998	B		SRR8909015	GFP	ClinVar	0.0174238	D
SRR8326920	MCP-ADAR1 DD-NLS - MS2 adRNA	non-syn	0.265864	G		SRR8790769	BE3(hA3A)-site 3	non-syn	0.05703	H		SRR8326920	MCP-ADAR1 DD-NLS - MS2 adRNA	Non-conservative	0.464172	G		SRR11561325	nCas9	Non-conservative	0.032038	E		SRR10523746	RESCUE+S375A	7th	0.123015	A		SRR10523746	RESCUE+S375A	7th	0.111636	A		SRR6686541	No guide-4LN-DD E488Q NLS	Oncogenes	0.154023	B		SRR8909009	GFP	ClinVar	0.0160962	D
SRR8326920	MCP-ADAR1 DD-NLS - MS2 adRNA	syn	0.267378	G		SRR8790769	BE3(hA3A)-site 3	syn	0.0811349	H		SRR8326920	MCP-ADAR1 DD-NLS - MS2 adRNA	Conservative	0.468939	G		SRR11561325	nCas9	Conservative	0.0305606	E		SRR10523704	RESCUE	7th	0.688357	A		SRR10523704	RESCUE	7th	0.147914	A		SRR6686541	No guide-4LN-DD E488Q NLS	ClinVar	0.126746	B		SRR8910104	GFP	ClinVar	0.0213776	D
SRR8326921	MCP-ADAR1 DD-NLS + MS2 adRNA	non-syn	0.311413	G		SRR8790770	BE3(hA3A)-site 3	non-syn	0.0592119	H		SRR8326921	MCP-ADAR1 DD-NLS + MS2 adRNA	Non-conservative	0.483149	G		SRR11561326	nCas9	Non-conservative	0.0323008	E		SRR10523724	RESCUE	7th	0.702606	A		SRR10523724	RESCUE	7th	0.156184	A		SRR6686541	No guide-4LN-DD E488Q NLS	CDS	0.204832	B		SRR8909021	GFP	ClinVar	0.0616921	D
SRR8326921	MCP-ADAR1 DD-NLS + MS2 adRNA	syn	0.314125	G		SRR8790770	BE3(hA3A)-site 3	syn	0.08667	H		SRR8326921	MCP-ADAR1 DD-NLS + MS2 adRNA	Conservative	0.49332	G		SRR11561326	nCas9	Conservative	0.0306987	E		SRR10523764	RESCUE+S375C	7th	0.188057	A		SRR10523764	RESCUE+S375C	7th	0.111356	A		SRR6686540	No guide-4LN-DD NLS	Essential genes	0.0195804	B		SRR8909015	GFP	CDS	0.0295534	D
SRR8326922	MCP-ADAR1 DD (E1008Q)-NES - MS2 adRNA	non-syn	1.50137	G		SRR8790771	BE3(W90A)-site 3	non-syn	0.0195035	H		SRR8326922	MCP-ADAR1 DD (E1008Q)-NES - MS2 adRNA	Non-conservative	2.37201	G		SRR8096262	BE3	Non-conservative	5.15578	I		SRR10523760	RESCUE+S375C	7th	0.205523	A		SRR10523760	RESCUE+S375C	7th	0.114711	A		SRR6686540	No guide-4LN-DD NLS	Oncogenes	0.0204041	B		SRR8909009	GFP	CDS	0.027979	D
SRR8326922	MCP-ADAR1 DD (E1008Q)-NES - MS2 adRNA	syn	1.42412	G		SRR8790771	BE3(W90A)-site 3	syn	0.0315149	H		SRR8326922	MCP-ADAR1 DD (E1008Q)-NES - MS2 adRNA	Conservative	2.28959	G		SRR8096262	BE3	Conservative	2.32209	I		SRR10523749	REPAIRv1(N81S)	7th	0.295059	A		SRR10523749	REPAIRv1(N81S)	7th	0.0870141	A		SRR6686540	No guide-4LN-DD NLS	ClinVar	0.0100233	B		SRR8910104	GFP	CDS	0.0363945	D
SRR8326923	MCP-ADAR1 DD (E1008Q)-NES + MS2 adRNA	non-syn	1.36095	G		SRR8790772	GFP	non-syn	0.0209376	H		SRR8326923	MCP-ADAR1 DD (E1008Q)-NES + MS2 adRNA	Non-conservative	1.96486	G		SRR8096263	BE3-E63Q	Non-conservative	0.054095	I		SRR10523717	RESCUE+S375A	7th	0.117646	A		SRR10523717	RESCUE+S375A	7th	0.111064	A		SRR6686540	No guide-4LN-DD NLS	CDS	0.0199888	B		SRR8909021	GFP	CDS	0.0286645	D
SRR8326923	MCP-ADAR1 DD (E1008Q)-NES + MS2 adRNA	syn	1.29304	G		SRR8790772	GFP	syn	0.0342003	H		SRR8326923	MCP-ADAR1 DD (E1008Q)-NES + MS2 adRNA	Conservative	1.90577	G		SRR8096263	BE3-E63Q	Conservative	0.0585432	I		SRR10523761	RESCUE+S375N	7th	0.400402	A		SRR10523761	RESCUE+S375N	7th	0.113807	A		SRR6686538	No guide-No enzyme	Essential genes	0.021122	B		SRR8910101	hA3A-BE3	Essential genes	0.980057	D
SRR8326924	MCP-ADAR1 DD (E1008Q)-NLS - MS2 adRNA	non-syn	0.714487	G		SRR8790773	GFP	non-syn	0.0191465	H		SRR8326924	MCP-ADAR1 DD (E1008Q)-NLS - MS2 adRNA	Non-conservative	1.09717	G		SRR8096267	BE3-R33A	Non-conservative	0.300393	I		SRR10523733	REPAIRv2	7th	0.103026	A		SRR10523733	REPAIRv2	7th	0.0865502	A		SRR6686538	No guide-No enzyme	Oncogenes	0.0220919	B		SRR8910093	hA3A-BE3	Essential genes	0.908386	D
SRR8326924	MCP-ADAR1 DD (E1008Q)-NLS - MS2 adRNA	syn	0.680747	G		SRR8790773	GFP	syn	0.0323836	H		SRR8326924	MCP-ADAR1 DD (E1008Q)-NLS - MS2 adRNA	Conservative	1.08366	G		SRR8096267	BE3-R33A	Conservative	0.161814	I		SRR10523741	REPAIRv2	7th	0.107442	A		SRR10523741	REPAIRv2	7th	0.0849447	A		SRR6686538	No guide-No enzyme	ClinVar	0.0110621	B		SRR8910097	hA3A-BE3	Essential genes	0.894905	D
SRR8326925	MCP-ADAR1 DD (E1008Q)-NLS +MS2 adRNA	non-syn	0.847056	G		SRR8790776	GFP	non-syn	0.019293	H		SRR8326925	MCP-ADAR1 DD (E1008Q)-NLS +MS2 adRNA	Non-conservative	1.25973	G		SRR8096269	BE3-R33A/K34A	Non-conservative	0.0787479	I		SRR10523712	REPAIRv1(X85W)	7th	0.866481	A		SRR10523712	REPAIRv1(X85W)	7th	0.0841693	A		SRR6686538	No guide-No enzyme	CDS	0.0219264	B		SRR8910101	hA3A-BE3	Oncogenes	0.957237	D
SRR8326925	MCP-ADAR1 DD (E1008Q)-NLS +MS2 adRNA	syn	0.806731	G		SRR8790776	GFP	syn	0.0329491	H		SRR8326925	MCP-ADAR1 DD (E1008Q)-NLS +MS2 adRNA	Conservative	1.25831	G		SRR8096269	BE3-R33A/K34A	Conservative	0.0665704	I		SRR10523743	RESCUE+S375A	7th	0.123715	A		SRR10523743	RESCUE+S375A	7th	0.113426	A		SRR8979759	ABEmax	Essential genes	0.462464	C		SRR8910093	hA3A-BE3	Oncogenes	0.892686	D
SRR8326926	MCP-ADAR2 DD-NES - MS2 adRNA	non-syn	0.145881	G		SRR8790777	GFP	non-syn	0.0194267	H		SRR8326926	MCP-ADAR2 DD-NES - MS2 adRNA	Non-conservative	0.237212	G		SRR8096298	BE3-E63Q	Non-conservative	0.0392266	I		SRR10523722	REPAIRv2	7th	0.108333	A		SRR10523722	REPAIRv2	7th	0.0876254	A		SRR8979754	ABEmax	Essential genes	0.438255	C		SRR8910097	hA3A-BE3	Oncogenes	0.882438	D
SRR8326926	MCP-ADAR2 DD-NES - MS2 adRNA	syn	0.14783	G		SRR8790777	GFP	syn	0.0329735	H		SRR8326926	MCP-ADAR2 DD-NES - MS2 adRNA	Conservative	0.202102	G		SRR8096298	BE3-E63Q	Conservative	0.0414593	I		SRR10523728	RESCUE+S375A	7th	0.115503	A		SRR10523728	RESCUE+S375A	7th	0.106299	A		SRR8979751	ABEmax	Essential genes	0.419123	C		SRR8910101	hA3A-BE3	ClinVar	1.55662	D
SRR8326927	MCP-ADAR2 DD-NES + MS2 adRNA	non-syn	0.218632	G		SRR8790778	BE3	non-syn	0.181741	H		SRR8326927	MCP-ADAR2 DD-NES + MS2 adRNA	Non-conservative	0.397546	G		SRR8096300	BE3-E63Q	Non-conservative	0.0391614	I		SRR10523713	RESCUE	7th	0.666735	A		SRR10523713	RESCUE	7th	0.15277	A		SRR8979759	ABEmax	Oncogenes	0.441616	C		SRR8910093	hA3A-BE3	ClinVar	1.47436	D
SRR8326927	MCP-ADAR2 DD-NES + MS2 adRNA	syn	0.216324	G		SRR8790778	BE3	syn	0.212848	H		SRR8326927	MCP-ADAR2 DD-NES + MS2 adRNA	Conservative	0.343244	G		SRR8096300	BE3-E63Q	Conservative	0.0391908	I		SRR10523721	RESCUE	7th	0.707932	A		SRR10523721	RESCUE	7th	0.158804	A		SRR8979754	ABEmax	Oncogenes	0.403157	C		SRR8910097	hA3A-BE3	ClinVar	1.45516	D
SRR8326928	MCP-ADAR2 DD (E488Q)-NES - MS2 adRNA	non-syn	0.338131	G		SRR8790779	BE3	non-syn	0.185088	H		SRR8326928	MCP-ADAR2 DD (E488Q)-NES - MS2 adRNA	Non-conservative	0.542963	G		SRR8096302	BE3	Non-conservative	3.68849	I		SRR10523727	RESCUE+N473I	7th	0.317926	A		SRR10523727	RESCUE+N473I	7th	0.106615	A		SRR8979751	ABEmax	Oncogenes	0.393587	C		SRR8910101	hA3A-BE3	CDS	0.929861	D
SRR8326928	MCP-ADAR2 DD (E488Q)-NES - MS2 adRNA	syn	0.324537	G		SRR8790779	BE3	syn	0.21586	H		SRR8326928	MCP-ADAR2 DD (E488Q)-NES - MS2 adRNA	Conservative	0.508983	G		SRR8096302	BE3	Conservative	1.62294	I		SRR10523759	RESCUE+S375A	7th	0.119783	A		SRR10523759	RESCUE+S375A	7th	0.106793	A		SRR8979759	ABEmax	ClinVar	0.441616	C		SRR8910093	hA3A-BE3	CDS	0.864204	D
SRR8326929	MCP-ADAR2 DD (E488Q)-NES + MS2 adRNA	non-syn	0.392503	G		SRR8790781	BE3	non-syn	0.210991	H		SRR8326929	MCP-ADAR2 DD (E488Q)-NES + MS2 adRNA	Non-conservative	0.624703	G		SRR8096303	BE3-R33A	Non-conservative	0.184731	I		SRR10523725	RESCUE+N473I	7th	0.372793	A		SRR10523725	RESCUE+N473I	7th	0.11211	A		SRR8979754	ABEmax	ClinVar	0.403157	C		SRR8910097	hA3A-BE3	CDS	0.855568	D
SRR8326929	MCP-ADAR2 DD (E488Q)-NES + MS2 adRNA	syn	0.374844	G		SRR8790781	BE3	syn	0.247712	H		SRR8326929	MCP-ADAR2 DD (E488Q)-NES + MS2 adRNA	Conservative	0.595524	G		SRR8096303	BE3-R33A	Conservative	0.100111	I		SRR10523737	RESCUE+S375A	7th	0.118257	A		SRR10523737	RESCUE+S375A	7th	0.110178	A		SRR8979751	ABEmax	ClinVar	0.393587	C		SRR8910103	hAID-BE3	Essential genes	0.0413863	D
SRR8326930	MCP-ADAR2 DD-NLS - MS2 adRNA	non-syn	0.121296	G		SRR9027793	BE3(hA3AR128A)-site 3	non-syn	0.0381423	H		SRR8326930	MCP-ADAR2 DD-NLS - MS2 adRNA	Non-conservative	0.189666	G		SRR8096304	BE3-R33A/K34A	Non-conservative	0.0567795	I		SRR10523758	RESCUE+N473I	7th	0.367571	A		SRR10523758	RESCUE+N473I	7th	0.109217	A		SRR8979759	ABEmax	CDS	0.46947	C		SRR8910095	hAID-BE3	Essential genes	0.03923	D
SRR8326930	MCP-ADAR2 DD-NLS - MS2 adRNA	syn	0.125818	G		SRR9027793	BE3(hA3AR128A)-site 3	syn	0.0503763	H		SRR8326930	MCP-ADAR2 DD-NLS - MS2 adRNA	Conservative	0.173544	G		SRR8096304	BE3-R33A/K34A	Conservative	0.0494964	I		SRR10523718	RESCUE+S375C	7th	0.195717	A		SRR10523718	RESCUE+S375C	7th	0.112566	A		SRR8979754	ABEmax	CDS	0.444084	C		SRR8910099	hAID-BE3	Essential genes	0.0387373	D
SRR8326931	MCP-ADAR2 DD-NLS + MS2 adRNA	non-syn	0.116868	G		SRR9027794	BE3(hA3AR128A)-site 3	non-syn	0.0379134	H		SRR8326931	MCP-ADAR2 DD-NLS + MS2 adRNA	Non-conservative	0.188519	G		SRR8096306	BE3	Non-conservative	4.37851	I		SRR10523763	RESCUE+S375A	7th	0.118899	A		SRR10523763	RESCUE+S375A	7th	0.111717	A		SRR8979751	ABEmax	CDS	0.424908	C		SRR8910103	hAID-BE3	Oncogenes	0.0415735	D
SRR8326931	MCP-ADAR2 DD-NLS + MS2 adRNA	syn	0.120532	G		SRR9027794	BE3(hA3AR128A)-site 3	syn	0.050014	H		SRR8326931	MCP-ADAR2 DD-NLS + MS2 adRNA	Conservative	0.160333	G		SRR8096306	BE3	Conservative	1.92156	I		SRR10523736	RESCUE+N473I	7th	0.312979	A		SRR10523736	RESCUE+N473I	7th	0.101678	A		SRR8979750	ABEmax(TadAE59A)	Essential genes	0.314826	C		SRR8910095	hAID-BE3	Oncogenes	0.0426347	D
SRR8326932	MCP-ADAR2 DD (E488Q)-NLS - MS2 adRNA	non-syn	0.286543	G		SRR9027802	BE3(hA3AR128A)-site 3	non-syn	0.0384112	H		SRR8326932	MCP-ADAR2 DD (E488Q)-NLS - MS2 adRNA	Non-conservative	0.486714	G		SRR8096307	BE3-R33A	Non-conservative	0.20163	I		SRR10523702	REPAIRv1(N81S)	7th	0.339215	A		SRR10523702	REPAIRv1(N81S)	7th	0.0866459	A		SRR8979753	ABEmax(TadAE59A)	Essential genes	0.452188	C		SRR8910099	hAID-BE3	Oncogenes	0.0420524	D
SRR8326932	MCP-ADAR2 DD (E488Q)-NLS - MS2 adRNA	syn	0.275237	G		SRR9027802	BE3(hA3AR128A)-site 3	syn	0.0509014	H		SRR8326932	MCP-ADAR2 DD (E488Q)-NLS - MS2 adRNA	Conservative	0.446092	G		SRR8096307	BE3-R33A	Conservative	0.107387	I		SRR10523744	RESCUE	7th	0.73703	A		SRR10523744	RESCUE	7th	0.157301	A		SRR8979758	ABEmax(TadAE59A)	Essential genes	0.389518	C		SRR8910103	hAID-BE3	ClinVar	0.0429714	D
SRR8326933	MCP-ADAR2 DD (E488Q)-NLS + MS2 adRNA	non-syn	0.361946	G		SRR9027807	BE3(hA3AY130F)-site 3	non-syn	0.0289014	H		SRR8326933	MCP-ADAR2 DD (E488Q)-NLS + MS2 adRNA	Non-conservative	0.600488	G		SRR8096308	BE3-R33A/K34A	Non-conservative	0.0599558	I		SRR10523745	RESCUE+N473I	7th	0.406935	A		SRR10523745	RESCUE+N473I	7th	0.114865	A		SRR8979750	ABEmax(TadAE59A)	Oncogenes	0.328355	C		SRR8910095	hAID-BE3	ClinVar	0.0386153	D
SRR8326933	MCP-ADAR2 DD (E488Q)-NLS + MS2 adRNA	syn	0.344576	G		SRR9027807	BE3(hA3AY130F)-site 3	syn	0.0374827	H		SRR8326933	MCP-ADAR2 DD (E488Q)-NLS + MS2 adRNA	Conservative	0.557948	G		SRR8096308	BE3-R33A/K34A	Conservative	0.0510485	I		SRR10523766	REPAIRv1(N81S)	7th	0.299905	A		SRR10523766	REPAIRv1(N81S)	7th	0.0851998	A		SRR8979758	ABEmax(TadAE59A)	Oncogenes	0.389776	C		SRR8910099	hAID-BE3	ClinVar	0.0327797	D
SRR8326936	ADAR2 - GluR2 adRNA	non-syn	0.10967	G		SRR9027808	BE3(hA3AY130F)-site 3	non-syn	0.0288959	H		SRR8326936	ADAR2 - GluR2 adRNA	Non-conservative	0.191593	G		SRR8096310	BE3	Non-conservative	3.8142	I		SRR10523738	RESCUE+S375C	7th	0.188761	A		SRR10523738	RESCUE+S375C	7th	0.109983	A		SRR8979753	ABEmax(TadAE59A)	Oncogenes	0.438405	C		SRR8910103	hAID-BE3	CDS	0.0434908	D
SRR8326936	ADAR2 - GluR2 adRNA	syn	0.116127	G		SRR9027808	BE3(hA3AY130F)-site 3	syn	0.0377491	H		SRR8326936	ADAR2 - GluR2 adRNA	Conservative	0.182265	G		SRR8096310	BE3	Conservative	1.70551	I		SRR10523730	RESCUE+S375N	7th	0.37374	A		SRR10523730	RESCUE+S375N	7th	0.112125	A		SRR8979750	ABEmax(TadAE59A)	ClinVar	0.328355	C		SRR8910095	hAID-BE3	CDS	0.0409345	D
SRR8326937	ADAR2 + GluR2 adRNA	non-syn	0.257111	G		SRR9027810	BE3(hA3AY130F)-site 3	non-syn	0.0270273	H		SRR8326937	ADAR2 + GluR2 adRNA	Non-conservative	0.482371	G		SRR8096311	BE3-R33A	Non-conservative	0.184454	I		SRR10523710	REPAIRv1(X85W)	7th	0.85117	A		SRR10523710	REPAIRv1(X85W)	7th	0.0871057	A		SRR8979758	ABEmax(TadAE59A)	ClinVar	0.389776	C		SRR8910099	hAID-BE3	CDS	0.0410781	D
SRR8326937	ADAR2 + GluR2 adRNA	syn	0.262424	G		SRR9027810	BE3(hA3AY130F)-site 3	syn	0.0363347	H		SRR8326937	ADAR2 + GluR2 adRNA	Conservative	0.556271	G		SRR8096311	BE3-R33A	Conservative	0.100337	I		SRR10523706	RESCUE+S375A	7th	0.113912	A		SRR10523706	RESCUE+S375A	7th	0.107269	A		SRR8979753	ABEmax(TadAE59A)	ClinVar	0.438405	C		SRR11561283	BE4-AmAPOBEC1	Essential genes	0.0480714	E
SRR8326939	ADAR2 (E488Q) +GluR2 adRNA	non-syn	1.5113	G		SRR8790747	BE3-site 3	non-syn	0.071941	H		SRR8326939	ADAR2 (E488Q) +GluR2 adRNA	Non-conservative	2.44578	G		SRR8096312	BE3-R33A/K34A	Non-conservative	0.0531904	I		SRR10523753	REPAIRv1(N81S)	7th	0.309131	A		SRR10523753	REPAIRv1(N81S)	7th	0.0875759	A		SRR8979750	ABEmax(TadAE59A)	CDS	0.314579	C		SRR11561285	BE4-AmAPOBEC1	Essential genes	0.0478589	E
SRR8326939	ADAR2 (E488Q) +GluR2 adRNA	syn	1.38537	G		SRR8790747	BE3-site 3	syn	0.090874	H		SRR8326939	ADAR2 (E488Q) +GluR2 adRNA	Conservative	2.68535	G		SRR8096312	BE3-R33A/K34A	Conservative	0.0457271	I		SRR10523719	RESCUE+S375N	7th	0.423028	A		SRR10523719	RESCUE+S375N	7th	0.115656	A		SRR8979753	ABEmax(TadAE59A)	CDS	0.452476	C		SRR11561282	BE4-AmAPOBEC1	Essential genes	0.0491345	E
SRR8326940	Cas13b-ADAR2 DD (E488Q) - gRNA	non-syn	0.803954	G		SRR8790748	BE3(W90A)-site 3	non-syn	0.0195898	H		SRR8326940	Cas13b-ADAR2 DD (E488Q) - gRNA	Non-conservative	1.23373	G		SRR8832240	GFP	Non-conservative	0.0413601	I		SRR10523755	REPAIRv2	7th	0.106742	A		SRR10523755	REPAIRv2	7th	0.0873816	A		SRR8979758	ABEmax(TadAE59A)	CDS	0.391085	C		SRR11561284	BE4-AmAPOBEC1	Essential genes	0.048429	E
SRR8326940	Cas13b-ADAR2 DD (E488Q) - gRNA	syn	0.773033	G		SRR8790748	BE3(W90A)-site 3	syn	0.0326335	H		SRR8326940	Cas13b-ADAR2 DD (E488Q) - gRNA	Conservative	1.1677	G		SRR8832240	GFP	Conservative	0.0375796	I		SRR10523752	RESCUE+S375N	7th	0.394619	A		SRR10523752	RESCUE+S375N	7th	0.112947	A		SRR8979752	ABEmax(TadAE59A,TadA*E59A)	Essential genes	0.21391	C		SRR11561286	BE4-AmAPOBEC1	Essential genes	0.0479385	E
SRR8326941	Cas13b-ADAR2 DD (E488Q) + gRNA	non-syn	0.45687	G		SRR8790749	BE3(W90A)-site 3	non-syn	0.0194127	H		SRR8326941	Cas13b-ADAR2 DD (E488Q) + gRNA	Non-conservative	0.729171	G		SRR8909009	GFP	Non-conservative	0.0281854	D		SRR10523748	RESCUE+S375N	7th	0.44047	A		SRR10523748	RESCUE+S375N	7th	0.119187	A		SRR8979749	ABEmax(TadAE59A,TadA*E59A)	Essential genes	0.216025	C		SRR11561281	BE4-AmAPOBEC1	Essential genes	0.0493199	E
SRR8326941	Cas13b-ADAR2 DD (E488Q) + gRNA	syn	0.440428	G		SRR8790749	BE3(W90A)-site 3	syn	0.0314869	H		SRR8326941	Cas13b-ADAR2 DD (E488Q) + gRNA	Conservative	0.697516	G		SRR8909009	GFP	Conservative	0.026279	D		SRR10523751	RESCUE+S375C	7th	0.190506	A		SRR10523751	RESCUE+S375C	7th	0.110213	A		SRR8979761	ABEmax(TadAE59A,TadA*E59A)	Essential genes	0.219912	C		SRR11561283	BE4-AmAPOBEC1	Oncogenes	0.0570919	E
SRR8326944	GluR2 adRNA	non-syn	0.0328002	G		SRR8790752	APOBEC1	non-syn	0.281943	H		SRR8326944	GluR2 adRNA	Non-conservative	0.0606527	G		SRR8909015	GFP	Non-conservative	0.0316635	D		SRR10523750	RESCUE+S375A	8th	0.214705	A		SRR10523750	RESCUE+S375A	8th	0.108903	A		SRR8979752	ABEmax(TadAE59A,TadA*E59A)	Oncogenes	0.239881	C		SRR11561285	BE4-AmAPOBEC1	Oncogenes	0.0571083	E
SRR8326944	GluR2 adRNA	syn	0.0417195	G		SRR8790752	APOBEC1	syn	0.326807	H		SRR8326944	GluR2 adRNA	Conservative	0.0578686	G		SRR8909015	GFP	Conservative	0.0296689	D		SRR10523707	RESCUE+S375C	8th	0.271905	A		SRR10523707	RESCUE+S375C	8th	0.116688	A		SRR8979749	ABEmax(TadAE59A,TadA*E59A)	Oncogenes	0.244313	C		SRR11561282	BE4-AmAPOBEC1	Oncogenes	0.0584511	E
SRR8326945	gRNA	non-syn	0.0343257	G		SRR8790754	APOBEC1	non-syn	0.296279	H		SRR8326945	gRNA	Non-conservative	0.0659334	G		SRR8909021	GFP	Non-conservative	0.0289109	D		SRR10523735	RESCUE	8th	0.733056	A		SRR10523735	RESCUE	8th	0.150729	A		SRR8979761	ABEmax(TadAE59A,TadA*E59A)	Oncogenes	0.247464	C		SRR11561284	BE4-AmAPOBEC1	Oncogenes	0.0572124	E
SRR8326945	gRNA	syn	0.0414051	G		SRR8790754	APOBEC1	syn	0.342927	H		SRR8326945	gRNA	Conservative	0.0588885	G		SRR8909021	GFP	Conservative	0.0266608	D		SRR10523742	REPAIRv1(X85W)	8th	0.807964	A		SRR10523742	REPAIRv1(X85W)	8th	0.0839091	A		SRR8979752	ABEmax(TadAE59A,TadA*E59A)	ClinVar	0.239881	C		SRR11561286	BE4-AmAPOBEC1	Oncogenes	0.0571303	E
SRR8790738	ABE7.10(F148A)-site 1	non-syn	0.0339707	H		SRR8790755	APOBEC1	non-syn	0.309714	H		SRR8790738	ABE7.10(F148A)-site 1	Non-conservative	0.0551175	H		SRR8910093	hA3A-BE3	Non-conservative	0.960713	D		SRR10523739	RESCUE+S375N	8th	0.481349	A		SRR10523739	RESCUE+S375N	8th	0.114008	A		SRR8979749	ABEmax(TadAE59A,TadA*E59A)	ClinVar	0.244313	C		SRR11561281	BE4-AmAPOBEC1	Oncogenes	0.0591259	E
SRR8790738	ABE7.10(F148A)-site 1	syn	0.0398588	H		SRR8790755	APOBEC1	syn	0.356593	H		SRR8790738	ABE7.10(F148A)-site 1	Conservative	0.0584218	H		SRR8910093	hA3A-BE3	Conservative	0.332946	D		SRR10523729	RESCUE+S375C	8th	0.236134	A		SRR10523729	RESCUE+S375C	8th	0.112436	A		SRR8979761	ABEmax(TadAE59A,TadA*E59A)	ClinVar	0.247464	C		SRR11561283	BE4-AmAPOBEC1	ClinVar	0.0356554	E
SRR8790739	ABE7.10(F148A)-site 1	non-syn	0.0343313	H		SRR8790756	GFP	non-syn	0.020529	H		SRR8790739	ABE7.10(F148A)-site 1	Non-conservative	0.058245	H		SRR8910094	eA3A-BE3	Non-conservative	0.0559237	D		SRR10523726	RESCUE	8th	0.645641	A		SRR10523726	RESCUE	8th	0.145597	A		SRR8979752	ABEmax(TadAE59A,TadA*E59A)	CDS	0.214884	C		SRR11561285	BE4-AmAPOBEC1	ClinVar	0.0376958	E
SRR8790739	ABE7.10(F148A)-site 1	syn	0.0403267	H		SRR8790756	GFP	syn	0.0344295	H		SRR8790739	ABE7.10(F148A)-site 1	Conservative	0.0633647	H		SRR8910094	eA3A-BE3	Conservative	0.0458154	D		SRR10523709	REPAIRv1(N81S)	8th	0.326229	A		SRR10523709	REPAIRv1(N81S)	8th	0.0797641	A		SRR8979749	ABEmax(TadAE59A,TadA*E59A)	CDS	0.217927	C		SRR11561282	BE4-AmAPOBEC1	ClinVar	0.0369714	E
SRR8790742	ABE7.10(D53E)-site 1	non-syn	0.168395	H		SRR8790757	GFP	non-syn	0.0209689	H		SRR8790742	ABE7.10(D53E)-site 1	Non-conservative	0.29697	H		SRR8910095	hAID-BE3	Non-conservative	0.0519523	D		SRR10523732	RESCUE+N473I	8th	0.492407	A		SRR10523732	RESCUE+N473I	8th	0.112722	A		SRR8979761	ABEmax(TadAE59A,TadA*E59A)	CDS	0.221305	C		SRR11561284	BE4-AmAPOBEC1	ClinVar	0.0419655	E
SRR8790742	ABE7.10(D53E)-site 1	syn	0.158047	H		SRR8790757	GFP	syn	0.0340512	H		SRR8790742	ABE7.10(D53E)-site 1	Conservative	0.287473	H		SRR8910095	hAID-BE3	Conservative	0.0557944	D		SRR10523723	REPAIRv1(X85W)	8th	0.936597	A		SRR10523723	REPAIRv1(X85W)	8th	0.0821162	A		SRR8979756	ABEmaxAW	Essential genes	0.246163	C		SRR11561286	BE4-AmAPOBEC1	ClinVar	0.0372132	E
SRR8790743	ABE7.10(D53E)-site 1	non-syn	0.175537	H		SRR8790758	BE3-site 3	non-syn	0.0727322	H		SRR8790743	ABE7.10(D53E)-site 1	Non-conservative	0.313223	H		SRR8910097	hA3A-BE3	Non-conservative	0.955022	D		SRR10523714	RESCUE+N473I	8th	0.472648	A		SRR10523714	RESCUE+N473I	8th	0.104618	A		SRR8979755	ABEmaxAW	Essential genes	0.251894	C		SRR11561281	BE4-AmAPOBEC1	ClinVar	0.0391843	E
SRR8790743	ABE7.10(D53E)-site 1	syn	0.164578	H		SRR8790758	BE3-site 3	syn	0.0919426	H		SRR8790743	ABE7.10(D53E)-site 1	Conservative	0.303426	H		SRR8910097	hA3A-BE3	Conservative	0.331332	D		SRR10523762	REPAIRv1(N81S)	8th	0.277424	A		SRR10523762	REPAIRv1(N81S)	8th	0.0827262	A		SRR8979762	ABEmaxAW	Essential genes	0.24782	C		SRR11561283	BE4-AmAPOBEC1	CDS	0.0488232	E
SRR8790744	ABE7.10(D53E)-site 1	non-syn	0.138657	H		SRR8790759	BE3-RNF2	non-syn	0.0934687	H		SRR8790744	ABE7.10(D53E)-site 1	Non-conservative	0.251605	H		SRR8910098	eA3A-BE3	Non-conservative	0.0568312	D		SRR10523734	REPAIRv1(X85W)	8th	0.710985	A		SRR10523734	REPAIRv1(X85W)	8th	0.0812637	A		SRR8979762	ABEmaxAW	Oncogenes	0.268811	C		SRR11561285	BE4-AmAPOBEC1	CDS	0.0479914	E
SRR8790744	ABE7.10(D53E)-site 1	syn	0.132109	H		SRR8790759	BE3-RNF2	syn	0.114302	H		SRR8790744	ABE7.10(D53E)-site 1	Conservative	0.23842	H		SRR8910098	eA3A-BE3	Conservative	0.0456819	D		SRR10523740	REPAIRv1(N81S)	8th	0.321985	A		SRR10523740	REPAIRv1(N81S)	8th	0.0841616	A		SRR8979756	ABEmaxAW	Oncogenes	0.260025	C		SRR11561282	BE4-AmAPOBEC1	CDS	0.0489475	E
SRR8790745	ABE7.10(F148A)-site 1	non-syn	0.0307216	H		SRR8790760	BE3-RNF2	non-syn	0.0825052	H		SRR8790745	ABE7.10(F148A)-site 1	Non-conservative	0.0520406	H		SRR8910099	hAID-BE3	Non-conservative	0.0508658	D		SRR10523756	REPAIRv1(X85W)	8th	0.90485	A		SRR10523756	REPAIRv1(X85W)	8th	0.0838175	A		SRR8979755	ABEmaxAW	Oncogenes	0.262674	C		SRR11561284	BE4-AmAPOBEC1	CDS	0.0489551	E
SRR8790745	ABE7.10(F148A)-site 1	syn	0.037095	H		SRR8790760	BE3-RNF2	syn	0.102847	H		SRR8790745	ABE7.10(F148A)-site 1	Conservative	0.0560619	H		SRR8910099	hAID-BE3	Conservative	0.0556257	D		SRR10523711	REPAIRv2	8th	0.102502	A		SRR10523711	REPAIRv2	8th	0.0827211	A		SRR8979762	ABEmaxAW	ClinVar	0.268811	C		SRR11561286	BE4-AmAPOBEC1	CDS	0.0480337	E
SRR8790750	TadA-TadA*	non-syn	0.321233	H		SRR8790761	BE3-RNF2	non-syn	0.0904057	H		SRR8790750	TadA-TadA*	Non-conservative	0.566813	H		SRR8910101	hA3A-BE3	Non-conservative	1.01302	D		SRR10523757	RESCUE	8th	0.780029	A		SRR10523757	RESCUE	8th	0.159014	A		SRR8979756	ABEmaxAW	ClinVar	0.260025	C		SRR11561281	BE4-AmAPOBEC1	CDS	0.0491198	E
SRR8790750	TadA-TadA*	syn	0.294693	H		SRR8790761	BE3-RNF2	syn	0.112	H		SRR8790750	TadA-TadA*	Conservative	0.499993	H		SRR8910101	hA3A-BE3	Conservative	0.345526	D		SRR10523708	RESCUE+S375N	8th	0.48466	A		SRR10523708	RESCUE+S375N	8th	0.115235	A		SRR8979755	ABEmaxAW	ClinVar	0.262674	C		SRR11561315	BE4-PpAPOBEC1	Essential genes	0.0692557	E
SRR8790751	TadA-TadA*	non-syn	0.318803	H		SRR8790768	BE3(hA3A)-site 3	non-syn	0.0542162	H		SRR8790751	TadA-TadA*	Non-conservative	0.567742	H		SRR8910102	eA3A-BE3	Non-conservative	0.0530224	D		SRR10523705	RESCUE+N473I	8th	0.438377	A		SRR10523705	RESCUE+N473I	8th	0.107677	A		SRR8979756	ABEmaxAW	CDS	0.247779	C		SRR11561312	BE4-PpAPOBEC1	Essential genes	0.0699902	E
SRR8790751	TadA-TadA*	syn	0.292385	H		SRR8790768	BE3(hA3A)-site 3	syn	0.0808557	H		SRR8790751	TadA-TadA*	Conservative	0.500327	H		SRR8910102	eA3A-BE3	Conservative	0.0411972	D		SRR10523747	RESCUE+S375C	8th	0.276345	A		SRR10523747	RESCUE+S375C	8th	0.117664	A		SRR8979762	ABEmaxAW	CDS	0.250638	C		SRR11561311	BE4-PpAPOBEC1	Essential genes	0.0705144	E
SRR8790753	TadA-TadA*	non-syn	0.292563	H		SRR8790769	BE3(hA3A)-site 3	non-syn	0.05703	H		SRR8790753	TadA-TadA*	Non-conservative	0.529093	H		SRR8910103	hAID-BE3	Non-conservative	0.0537714	D		SRR10523720	REPAIRv1(N81S)	8th	0.318617	A		SRR10523720	REPAIRv1(N81S)	8th	0.0843058	A		SRR8979755	ABEmaxAW	CDS	0.253511	C		SRR11561310	BE4-PpAPOBEC1	Essential genes	0.0706495	E
SRR8790753	TadA-TadA*	syn	0.269362	H		SRR8790769	BE3(hA3A)-site 3	syn	0.0811349	H		SRR8790753	TadA-TadA*	Conservative	0.459256	H		SRR8910103	hAID-BE3	Conservative	0.0584639	D		SRR10523716	RESCUE+N473I	8th	0.446426	A		SRR10523716	RESCUE+N473I	8th	0.107474	A		SRR8979760	Cas9D10A	Essential genes	0.206523	C		SRR11561316	BE4-PpAPOBEC1	Essential genes	0.0694333	E
SRR8790756	GFP	non-syn	0.0187282	H		SRR8790770	BE3(hA3A)-site 3	non-syn	0.0592119	H		SRR8790756	GFP	Non-conservative	0.027804	H		SRR8910104	GFP	Non-conservative	0.0372901	D		SRR10523703	REPAIRv2	8th	0.136912	A		SRR10523703	REPAIRv2	8th	0.083343	A		SRR8979757	Cas9D10A	Essential genes	0.214358	C		SRR11561313	BE4-PpAPOBEC1	Essential genes	0.0699837	E
SRR8790756	GFP	syn	0.0259921	H		SRR8790770	BE3(hA3A)-site 3	syn	0.08667	H		SRR8790756	GFP	Conservative	0.0280562	H		SRR8910104	GFP	Conservative	0.0325302	D		SRR10523765	RESCUE+S375N	8th	0.508678	A		SRR10523765	RESCUE+S375N	8th	0.117929	A		SRR8979748	Cas9D10A	Essential genes	0.209074	C		SRR11561315	BE4-PpAPOBEC1	Oncogenes	0.0779599	E
SRR8790757	GFP	non-syn	0.018947	H		SRR8790771	BE3(W90A)-site 3	non-syn	0.0195035	H		SRR8790757	GFP	Non-conservative	0.0286581	H								SRR10523731	REPAIRv1(N81S)	8th	0.247663	A		SRR10523731	REPAIRv1(N81S)	8th	0.0830573	A		SRR8979760	Cas9D10A	Oncogenes	0.232884	C		SRR11561312	BE4-PpAPOBEC1	Oncogenes	0.0787654	E
SRR8790757	GFP	syn	0.0263655	H		SRR8790771	BE3(W90A)-site 3	syn	0.0315149	H		SRR8790757	GFP	Conservative	0.0285144	H								SRR10523754	RESCUE+S375C	8th	0.261699	A		SRR10523754	RESCUE+S375C	8th	0.117621	A		SRR8979757	Cas9D10A	Oncogenes	0.233009	C		SRR11561311	BE4-PpAPOBEC1	Oncogenes	0.0797422	E
SRR8790762	ABE7.10-site 1	non-syn	0.181853	H		SRR8790772	GFP	non-syn	0.0209376	H		SRR8790762	ABE7.10-site 1	Non-conservative	0.336865	H								SRR10523715	RESCUE	8th	0.760902	A		SRR10523715	RESCUE	8th	0.156251	A		SRR8979748	Cas9D10A	Oncogenes	0.221387	C		SRR11561310	BE4-PpAPOBEC1	Oncogenes	0.0808643	E
SRR8790762	ABE7.10-site 1	syn	0.169983	H		SRR8790772	GFP	syn	0.0342003	H		SRR8790762	ABE7.10-site 1	Conservative	0.313684	H								SRR10523746	RESCUE+S375A	8th	0.207001	A		SRR10523746	RESCUE+S375A	8th	0.110921	A		SRR8979760	Cas9D10A	ClinVar	0.232884	C		SRR11561316	BE4-PpAPOBEC1	Oncogenes	0.0779901	E
SRR8790763	ABE7.10-site 1	non-syn	0.179797	H		SRR8790773	GFP	non-syn	0.0191465	H		SRR8790763	ABE7.10-site 1	Non-conservative	0.332042	H								SRR10523701	RESCUE+S375N	8th	0.522757	A		SRR10523701	RESCUE+S375N	8th	0.116622	A		SRR8979757	Cas9D10A	ClinVar	0.233009	C		SRR11561313	BE4-PpAPOBEC1	Oncogenes	0.0794309	E
SRR8790763	ABE7.10-site 1	syn	0.167827	H		SRR8790773	GFP	syn	0.0323836	H		SRR8790763	ABE7.10-site 1	Conservative	0.307602	H								SRR10523704	RESCUE	8th	0.767297	A		SRR10523704	RESCUE	8th	0.155203	A		SRR8979748	Cas9D10A	ClinVar	0.221387	C		SRR11561315	BE4-PpAPOBEC1	ClinVar	0.0618739	E
SRR8790764	ABE7.10-site 1	non-syn	0.181202	H		SRR8790776	GFP	non-syn	0.019293	H		SRR8790764	ABE7.10-site 1	Non-conservative	0.316044	H								SRR10523724	RESCUE	8th	0.792002	A		SRR10523724	RESCUE	8th	0.15857	A		SRR8979760	Cas9D10A	CDS	0.20843	C		SRR11561312	BE4-PpAPOBEC1	ClinVar	0.0653385	E
SRR8790764	ABE7.10-site 1	syn	0.167892	H		SRR8790776	GFP	syn	0.0329491	H		SRR8790764	ABE7.10-site 1	Conservative	0.285761	H								SRR10523764	RESCUE+S375C	8th	0.284299	A		SRR10523764	RESCUE+S375C	8th	0.114859	A		SRR8979757	Cas9D10A	CDS	0.215793	C		SRR11561311	BE4-PpAPOBEC1	ClinVar	0.0635518	E
SRR8790765	ABE7.10-site 2	non-syn	0.246123	H		SRR8790777	GFP	non-syn	0.0194267	H		SRR8790765	ABE7.10-site 2	Non-conservative	0.448325	H								SRR10523749	REPAIRv1(N81S)	8th	0.305202	A		SRR10523749	REPAIRv1(N81S)	8th	0.0833774	A		SRR8979748	Cas9D10A	CDS	0.210075	C		SRR11561310	BE4-PpAPOBEC1	ClinVar	0.0653471	E
SRR8790765	ABE7.10-site 2	syn	0.226985	H		SRR8790777	GFP	syn	0.0329735	H		SRR8790765	ABE7.10-site 2	Conservative	0.413662	H								SRR10523717	RESCUE+S375A	8th	0.213525	A		SRR10523717	RESCUE+S375A	8th	0.111294	A		SRR8909011	ABEmax	Essential genes	0.877667	D		SRR11561316	BE4-PpAPOBEC1	ClinVar	0.0632539	E
SRR8790766	ABE7.10-site 2	non-syn	0.254472	H		SRR8790778	BE3	non-syn	0.181741	H		SRR8790766	ABE7.10-site 2	Non-conservative	0.451062	H								SRR10523760	RESCUE+S375C	8th	0.273467	A		SRR10523760	RESCUE+S375C	8th	0.11572	A		SRR8909017	ABEmax	Essential genes	0.883574	D		SRR11561313	BE4-PpAPOBEC1	ClinVar	0.0687925	E
SRR8790766	ABE7.10-site 2	syn	0.234016	H		SRR8790778	BE3	syn	0.212848	H		SRR8790766	ABE7.10-site 2	Conservative	0.422047	H								SRR10523761	RESCUE+S375N	8th	0.463761	A		SRR10523761	RESCUE+S375N	8th	0.115365	A		SRR8909005	ABEmax	Essential genes	0.907774	D		SRR11561313	BE4-PpAPOBEC1	CDS	0.0697762	E
SRR8790767	ABE7.10-site 2	non-syn	0.241478	H		SRR8790779	BE3	non-syn	0.185088	H		SRR8790767	ABE7.10-site 2	Non-conservative	0.432761	H								SRR10523733	REPAIRv2	8th	0.100733	A		SRR10523733	REPAIRv2	8th	0.0814287	A		SRR8908980	ABEmax	Essential genes	0.965625	D		SRR11561315	BE4-PpAPOBEC1	CDS	0.0688108	E
SRR8790767	ABE7.10-site 2	syn	0.222667	H		SRR8790779	BE3	syn	0.21586	H		SRR8790767	ABE7.10-site 2	Conservative	0.405219	H								SRR10523741	REPAIRv2	8th	0.133709	A		SRR10523741	REPAIRv2	8th	0.0813213	A		SRR8908985	ABEmax	Essential genes	0.809915	D		SRR11561312	BE4-PpAPOBEC1	CDS	0.0698224	E
SRR8790772	GFP	non-syn	0.0193385	H		SRR8790781	BE3	non-syn	0.210991	H		SRR8790772	GFP	Non-conservative	0.0292823	H								SRR10523743	RESCUE+S375A	8th	0.214941	A		SRR10523743	RESCUE+S375A	8th	0.112847	A		SRR8908990	ABEmax	Essential genes	0.600924	D		SRR11561311	BE4-PpAPOBEC1	CDS	0.0703055	E
SRR8790772	GFP	syn	0.0267571	H		SRR8790781	BE3	syn	0.247712	H		SRR8790772	GFP	Conservative	0.0296407	H								SRR10523722	REPAIRv2	8th	0.13415	A		SRR10523722	REPAIRv2	8th	0.0835006	A		SRR8909000	ABEmax	Essential genes	0.965716	D		SRR11561310	BE4-PpAPOBEC1	CDS	0.0704882	E
SRR8790773	GFP	non-syn	0.0185169	H		SRR9027793	BE3(hA3AR128A)-site 3	non-syn	0.0381423	H		SRR8790773	GFP	Non-conservative	0.03166	H								SRR10523712	REPAIRv1(X85W)	8th	0.88413	A		SRR10523712	REPAIRv1(X85W)	8th	0.081833	A		SRR8908975	ABEmax	Essential genes	0.604315	D		SRR11561316	BE4-PpAPOBEC1	CDS	0.0688146	E
SRR8790773	GFP	syn	0.0264354	H		SRR9027793	BE3(hA3AR128A)-site 3	syn	0.0503763	H		SRR8790773	GFP	Conservative	0.0318825	H								SRR10523728	RESCUE+S375A	8th	0.191758	A		SRR10523728	RESCUE+S375A	8th	0.106701	A		SRR8908995	ABEmax	Essential genes	0.910961	D		SRR11561302	BE4-PpAPOBEC1-H122A	Essential genes	0.0736261	E
SRR8790774	ABE7.10	non-syn	0.178141	H		SRR9027794	BE3(hA3AR128A)-site 3	non-syn	0.0379134	H		SRR8790774	ABE7.10	Non-conservative	0.336884	H								SRR10523713	RESCUE	8th	0.757504	A		SRR10523713	RESCUE	8th	0.154991	A		SRR8909011	ABEmax	Oncogenes	0.831319	D		SRR11561295	BE4-PpAPOBEC1-H122A	Essential genes	0.0699192	E
SRR8790774	ABE7.10	syn	0.16705	H		SRR9027794	BE3(hA3AR128A)-site 3	syn	0.050014	H		SRR8790774	ABE7.10	Conservative	0.310835	H								SRR10523721	RESCUE	8th	0.781524	A		SRR10523721	RESCUE	8th	0.159182	A		SRR8909017	ABEmax	Oncogenes	0.822909	D		SRR11561301	BE4-PpAPOBEC1-H122A	Essential genes	0.0734067	E
SRR8790775	ABE7.10	non-syn	0.171563	H		SRR9027802	BE3(hA3AR128A)-site 3	non-syn	0.0384112	H		SRR8790775	ABE7.10	Non-conservative	0.324853	H								SRR10523759	RESCUE+S375A	8th	0.200877	A		SRR10523759	RESCUE+S375A	8th	0.106067	A		SRR8909005	ABEmax	Oncogenes	0.8532	D		SRR11561294	BE4-PpAPOBEC1-H122A	Essential genes	0.069438	E
SRR8790775	ABE7.10	syn	0.161661	H		SRR9027802	BE3(hA3AR128A)-site 3	syn	0.0509014	H		SRR8790775	ABE7.10	Conservative	0.300462	H								SRR10523727	RESCUE+N473I	8th	0.383151	A		SRR10523727	RESCUE+N473I	8th	0.105905	A		SRR8908980	ABEmax	Oncogenes	0.917135	D		SRR11561300	BE4-PpAPOBEC1-H122A	Essential genes	0.0575667	E
SRR8790776	GFP	non-syn	0.0186193	H		SRR9027807	BE3(hA3AY130F)-site 3	non-syn	0.0289014	H		SRR8790776	GFP	Non-conservative	0.0318643	H								SRR10523725	RESCUE+N473I	8th	0.470839	A		SRR10523725	RESCUE+N473I	8th	0.110011	A		SRR8908985	ABEmax	Oncogenes	0.777841	D		SRR11561296	BE4-PpAPOBEC1-H122A	Essential genes	0.0574112	E
SRR8790776	GFP	syn	0.0263495	H		SRR9027807	BE3(hA3AY130F)-site 3	syn	0.0374827	H		SRR8790776	GFP	Conservative	0.031366	H								SRR10523737	RESCUE+S375A	8th	0.230563	A		SRR10523737	RESCUE+S375A	8th	0.108771	A		SRR8908990	ABEmax	Oncogenes	0.559099	D		SRR11561302	BE4-PpAPOBEC1-H122A	Oncogenes	0.081214	E
SRR8790777	GFP	non-syn	0.0188648	H		SRR9027808	BE3(hA3AY130F)-site 3	non-syn	0.0288959	H		SRR8790777	GFP	Non-conservative	0.0306924	H								SRR10523758	RESCUE+N473I	8th	0.437161	A		SRR10523758	RESCUE+N473I	8th	0.104882	A		SRR8909000	ABEmax	Oncogenes	0.91641	D		SRR11561295	BE4-PpAPOBEC1-H122A	Oncogenes	0.0762235	E
SRR8790777	GFP	syn	0.0263871	H		SRR9027808	BE3(hA3AY130F)-site 3	syn	0.0377491	H		SRR8790777	GFP	Conservative	0.0300474	H								SRR10523718	RESCUE+S375C	8th	0.279567	A		SRR10523718	RESCUE+S375C	8th	0.116758	A		SRR8908975	ABEmax	Oncogenes	0.571276	D		SRR11561294	BE4-PpAPOBEC1-H122A	Oncogenes	0.0759876	E
SRR8790780	ABE7.10	non-syn	0.216318	H		SRR9027810	BE3(hA3AY130F)-site 3	non-syn	0.0270273	H		SRR8790780	ABE7.10	Non-conservative	0.396672	H								SRR10523763	RESCUE+S375A	8th	0.242775	A		SRR10523763	RESCUE+S375A	8th	0.111371	A		SRR8908995	ABEmax	Oncogenes	0.851413	D		SRR11561301	BE4-PpAPOBEC1-H122A	Oncogenes	0.0815988	E
SRR8790780	ABE7.10	syn	0.201023	H		SRR9027810	BE3(hA3AY130F)-site 3	syn	0.0363347	H		SRR8790780	ABE7.10	Conservative	0.363762	H								SRR10523736	RESCUE+N473I	8th	0.38531	A		SRR10523736	RESCUE+N473I	8th	0.101744	A		SRR8909011	ABEmax	ClinVar	1.14138	D		SRR11561300	BE4-PpAPOBEC1-H122A	Oncogenes	0.0621787	E
SRR9027783	ABE7.10(F148A)-site 2	non-syn	0.0583281	H		SRR8096262	BE3	non-syn	2.14117	I		SRR9027783	ABE7.10(F148A)-site 2	Non-conservative	0.0953514	H								SRR10523702	REPAIRv1(N81S)	8th	0.351672	A		SRR10523702	REPAIRv1(N81S)	8th	0.0830112	A		SRR8909017	ABEmax	ClinVar	1.08295	D		SRR11561296	BE4-PpAPOBEC1-H122A	Oncogenes	0.0625127	E
SRR9027783	ABE7.10(F148A)-site 2	syn	0.062465	H		SRR8096262	BE3	syn	2.34974	I		SRR9027783	ABE7.10(F148A)-site 2	Conservative	0.118873	H								SRR10523744	RESCUE	8th	0.806572	A		SRR10523744	RESCUE	8th	0.161464	A		SRR8909005	ABEmax	ClinVar	1.16693	D		SRR11561302	BE4-PpAPOBEC1-H122A	ClinVar	0.0654053	E
SRR9027787	ABE7.10(F148A)-site 2	non-syn	0.0615114	H		SRR8096263	BE3-E63Q	non-syn	0.0276633	I		SRR9027787	ABE7.10(F148A)-site 2	Non-conservative	0.100286	H								SRR10523745	RESCUE+N473I	8th	0.487224	A		SRR10523745	RESCUE+N473I	8th	0.113559	A		SRR8908980	ABEmax	ClinVar	1.26944	D		SRR11561295	BE4-PpAPOBEC1-H122A	ClinVar	0.0593616	E
SRR9027787	ABE7.10(F148A)-site 2	syn	0.0653641	H		SRR8096263	BE3-E63Q	syn	0.0409668	I		SRR9027787	ABE7.10(F148A)-site 2	Conservative	0.12598	H								SRR10523766	REPAIRv1(N81S)	8th	0.311403	A		SRR10523766	REPAIRv1(N81S)	8th	0.0833639	A		SRR8908985	ABEmax	ClinVar	1.07815	D		SRR11561294	BE4-PpAPOBEC1-H122A	ClinVar	0.0630186	E
SRR9027788	ABE7.10(F148A)-site 2	non-syn	0.0554354	H		SRR8096267	BE3-R33A	non-syn	0.107579	I		SRR9027788	ABE7.10(F148A)-site 2	Non-conservative	0.093888	H								SRR10523738	RESCUE+S375C	8th	0.272884	A		SRR10523738	RESCUE+S375C	8th	0.11272	A		SRR8908990	ABEmax	ClinVar	0.753633	D		SRR11561301	BE4-PpAPOBEC1-H122A	ClinVar	0.0638446	E
SRR9027788	ABE7.10(F148A)-site 2	syn	0.0598332	H		SRR8096267	BE3-R33A	syn	0.126748	I		SRR9027788	ABE7.10(F148A)-site 2	Conservative	0.115492	H								SRR10523730	RESCUE+S375N	8th	0.4402	A		SRR10523730	RESCUE+S375N	8th	0.113437	A		SRR8909000	ABEmax	ClinVar	1.24037	D		SRR11561300	BE4-PpAPOBEC1-H122A	ClinVar	0.0484874	E
						SRR8096269	BE3-R33A/K34A	non-syn	0.0356174	I														SRR10523710	REPAIRv1(X85W)	8th	0.867643	A		SRR10523710	REPAIRv1(X85W)	8th	0.0854285	A		SRR8908975	ABEmax	ClinVar	0.783004	D		SRR11561296	BE4-PpAPOBEC1-H122A	ClinVar	0.044561	E
						SRR8096269	BE3-R33A/K34A	syn	0.0494907	I														SRR10523706	RESCUE+S375A	8th	0.199437	A		SRR10523706	RESCUE+S375A	8th	0.106972	A		SRR8908995	ABEmax	ClinVar	1.21851	D		SRR11561302	BE4-PpAPOBEC1-H122A	CDS	0.0735249	E
						SRR8096298	BE3-E63Q	non-syn	0.0224546	I														SRR10523753	REPAIRv1(N81S)	8th	0.322502	A		SRR10523753	REPAIRv1(N81S)	8th	0.08526	A		SRR8909017	ABEmax	CDS	0.874457	D		SRR11561295	BE4-PpAPOBEC1-H122A	CDS	0.0705598	E
						SRR8096298	BE3-E63Q	syn	0.0419514	I														SRR10523719	RESCUE+S375N	8th	0.504556	A		SRR10523719	RESCUE+S375N	8th	0.117545	A		SRR8909011	ABEmax	CDS	0.869642	D		SRR11561294	BE4-PpAPOBEC1-H122A	CDS	0.0700528	E
						SRR8096300	BE3-E63Q	non-syn	0.0223749	I														SRR10523755	REPAIRv2	8th	0.136247	A		SRR10523755	REPAIRv2	8th	0.0820728	A		SRR8909005	ABEmax	CDS	0.899944	D		SRR11561301	BE4-PpAPOBEC1-H122A	CDS	0.0733706	E
						SRR8096300	BE3-E63Q	syn	0.0403961	I														SRR10523752	RESCUE+S375N	8th	0.476058	A		SRR10523752	RESCUE+S375N	8th	0.115729	A		SRR8908980	ABEmax	CDS	0.970088	D		SRR11561300	BE4-PpAPOBEC1-H122A	CDS	0.0579963	E
						SRR8096302	BE3	non-syn	1.68228	I														SRR10523748	RESCUE+S375N	8th	0.511423	A		SRR10523748	RESCUE+S375N	8th	0.120351	A		SRR8908985	ABEmax	CDS	0.82216	D		SRR11561296	BE4-PpAPOBEC1-H122A	CDS	0.0580741	E
						SRR8096302	BE3	syn	1.83929	I														SRR10523751	RESCUE+S375C	8th	0.274951	A		SRR10523751	RESCUE+S375C	8th	0.112467	A		SRR8908990	ABEmax	CDS	0.598942	D		SRR11561309	BE4-PpAPOBEC1-R33A	Essential genes	0.046461	E
						SRR8096303	BE3-R33A	non-syn	0.0805993	I														SRR10523742	REPAIRv1(X85W)	9th	0.802094	A		SRR10523742	REPAIRv1(X85W)	9th	0.0764522	A		SRR8909000	ABEmax	CDS	0.972657	D		SRR11561304	BE4-PpAPOBEC1-R33A	Essential genes	0.0459545	E
						SRR8096303	BE3-R33A	syn	0.107287	I														SRR10523707	RESCUE+S375C	9th	0.256248	A		SRR10523707	RESCUE+S375C	9th	0.109072	A		SRR8908975	ABEmax	CDS	0.60256	D		SRR11561308	BE4-PpAPOBEC1-R33A	Essential genes	0.0464205	E
						SRR8096304	BE3-R33A/K34A	non-syn	0.0289934	I														SRR10523735	RESCUE	9th	0.719313	A		SRR10523735	RESCUE	9th	0.145355	A		SRR8908995	ABEmax	CDS	0.910073	D		SRR11561305	BE4-PpAPOBEC1-R33A	Essential genes	0.0460224	E
						SRR8096304	BE3-R33A/K34A	syn	0.051078	I														SRR10523739	RESCUE+S375N	9th	0.465933	A		SRR10523739	RESCUE+S375N	9th	0.107752	A		SRR8909015	GFP	Essential genes	0.016531	D		SRR11561307	BE4-PpAPOBEC1-R33A	Essential genes	0.0460079	E
						SRR8096306	BE3	non-syn	2.04808	I														SRR10523750	RESCUE+S375A	9th	0.196132	A		SRR10523750	RESCUE+S375A	9th	0.101385	A		SRR8909009	GFP	Essential genes	0.0157708	D		SRR11561306	BE4-PpAPOBEC1-R33A	Essential genes	0.0458865	E
						SRR8096306	BE3	syn	2.23059	I														SRR10523729	RESCUE+S375C	9th	0.224758	A		SRR10523729	RESCUE+S375C	9th	0.104342	A		SRR8910104	GFP	Essential genes	0.019178	D		SRR11561309	BE4-PpAPOBEC1-R33A	Oncogenes	0.0510369	E
						SRR8096307	BE3-R33A	non-syn	0.0861823	I														SRR10523709	REPAIRv1(N81S)	9th	0.316011	A		SRR10523709	REPAIRv1(N81S)	9th	0.0732382	A		SRR8909021	GFP	Essential genes	0.0157974	D		SRR11561304	BE4-PpAPOBEC1-R33A	Oncogenes	0.0517626	E
						SRR8096307	BE3-R33A	syn	0.10854	I														SRR10523732	RESCUE+N473I	9th	0.474722	A		SRR10523732	RESCUE+N473I	9th	0.105819	A		SRR8909015	GFP	Oncogenes	0.0166549	D		SRR11561305	BE4-PpAPOBEC1-R33A	Oncogenes	0.0513511	E
						SRR8096308	BE3-R33A/K34A	non-syn	0.0299636	I														SRR10523723	REPAIRv1(X85W)	9th	0.926931	A		SRR10523723	REPAIRv1(X85W)	9th	0.0755563	A		SRR8909009	GFP	Oncogenes	0.0169342	D		SRR11561308	BE4-PpAPOBEC1-R33A	Oncogenes	0.051188	E
						SRR8096308	BE3-R33A/K34A	syn	0.0502266	I														SRR10523726	RESCUE	9th	0.632304	A		SRR10523726	RESCUE	9th	0.136212	A		SRR8910104	GFP	Oncogenes	0.0193067	D		SRR11561307	BE4-PpAPOBEC1-R33A	Oncogenes	0.0512513	E
						SRR8096310	BE3	non-syn	1.77019	I														SRR10523734	REPAIRv1(X85W)	9th	0.708546	A		SRR10523734	REPAIRv1(X85W)	9th	0.0758087	A		SRR8909021	GFP	Oncogenes	0.0163893	D		SRR11561306	BE4-PpAPOBEC1-R33A	Oncogenes	0.0513395	E
						SRR8096310	BE3	syn	1.92805	I														SRR10523714	RESCUE+N473I	9th	0.449451	A		SRR10523714	RESCUE+N473I	9th	0.0975472	A		SRR8909015	GFP	ClinVar	0.00819254	D		SRR11561309	BE4-PpAPOBEC1-R33A	ClinVar	0.0351662	E
						SRR8096311	BE3-R33A	non-syn	0.0774682	I														SRR10523762	REPAIRv1(N81S)	9th	0.273397	A		SRR10523762	REPAIRv1(N81S)	9th	0.0758052	A		SRR8909009	GFP	ClinVar	0.00650259	D		SRR11561304	BE4-PpAPOBEC1-R33A	ClinVar	0.03334	E
						SRR8096311	BE3-R33A	syn	0.101956	I														SRR10523756	REPAIRv1(X85W)	9th	0.893526	A		SRR10523756	REPAIRv1(X85W)	9th	0.0781141	A		SRR8910104	GFP	ClinVar	0.00877166	D		SRR11561308	BE4-PpAPOBEC1-R33A	ClinVar	0.0326919	E
						SRR8096312	BE3-R33A/K34A	non-syn	0.0267235	I														SRR10523711	REPAIRv2	9th	0.104004	A		SRR10523711	REPAIRv2	9th	0.0773084	A		SRR8909021	GFP	ClinVar	0.00933308	D		SRR11561305	BE4-PpAPOBEC1-R33A	ClinVar	0.0337715	E
						SRR8096312	BE3-R33A/K34A	syn	0.0452212	I														SRR10523740	REPAIRv1(N81S)	9th	0.31687	A		SRR10523740	REPAIRv1(N81S)	9th	0.0797475	A		SRR8909015	GFP	CDS	0.0176225	D		SRR11561307	BE4-PpAPOBEC1-R33A	ClinVar	0.0362659	E
						SRR8832240	GFP	non-syn	0.0241366	I														SRR10523757	RESCUE	9th	0.77197	A		SRR10523757	RESCUE	9th	0.153052	A		SRR8909009	GFP	CDS	0.0166934	D		SRR11561306	BE4-PpAPOBEC1-R33A	ClinVar	0.0363297	E
						SRR8832240	GFP	syn	0.036833	I														SRR10523708	RESCUE+S375N	9th	0.470687	A		SRR10523708	RESCUE+S375N	9th	0.108262	A		SRR8910104	GFP	CDS	0.0317414	D		SRR11561309	BE4-PpAPOBEC1-R33A	CDS	0.0467656	E
																								SRR10523705	RESCUE+N473I	9th	0.419769	A		SRR10523705	RESCUE+N473I	9th	0.0987064	A		SRR8909021	GFP	CDS	0.0168499	D		SRR11561304	BE4-PpAPOBEC1-R33A	CDS	0.0468314	E
																								SRR10523747	RESCUE+S375C	9th	0.260165	A		SRR10523747	RESCUE+S375C	9th	0.110254	A		SRR8909007	K20A/R21A	Essential genes	0.180235	D		SRR11561308	BE4-PpAPOBEC1-R33A	CDS	0.0467015	E
																								SRR10523720	REPAIRv1(N81S)	9th	0.310273	A		SRR10523720	REPAIRv1(N81S)	9th	0.0780702	A		SRR8909019	K20A/R21A	Essential genes	0.208955	D		SRR11561305	BE4-PpAPOBEC1-R33A	CDS	0.0468076	E
																								SRR10523716	RESCUE+N473I	9th	0.425585	A		SRR10523716	RESCUE+N473I	9th	0.09917	A		SRR8908977	K20A/R21A	Essential genes	0.107083	D		SRR11561306	BE4-PpAPOBEC1-R33A	CDS	0.0465481	E
																								SRR10523703	REPAIRv2	9th	0.132113	A		SRR10523703	REPAIRv2	9th	0.0791053	A		SRR8909013	K20A/R21A	Essential genes	0.194588	D		SRR11561307	BE4-PpAPOBEC1-R33A	CDS	0.0467683	E
																								SRR10523731	REPAIRv1(N81S)	9th	0.240014	A		SRR10523731	REPAIRv1(N81S)	9th	0.0757258	A		SRR8908987	K20A/R21A	Essential genes	0.222182	D		SRR11561298	BE4-rAPOBEC1	Essential genes	0.733908	E
																								SRR10523765	RESCUE+S375N	9th	0.492228	A		SRR10523765	RESCUE+S375N	9th	0.114019	A		SRR8908992	K20A/R21A	Essential genes	0.153399	D		SRR11561299	BE4-rAPOBEC1	Essential genes	0.744898	E
																								SRR10523754	RESCUE+S375C	9th	0.252959	A		SRR10523754	RESCUE+S375C	9th	0.113497	A		SRR8908997	K20A/R21A	Essential genes	0.221839	D		SRR11561297	BE4-rAPOBEC1	Essential genes	0.733158	E
																								SRR10523715	RESCUE	9th	0.746829	A		SRR10523715	RESCUE	9th	0.148222	A		SRR8909002	K20A/R21A	Essential genes	0.233536	D		SRR11561323	BE4-rAPOBEC1	Essential genes	0.7626	E
																								SRR10523701	RESCUE+S375N	9th	0.50295	A		SRR10523701	RESCUE+S375N	9th	0.11052	A		SRR8908982	K20A/R21A	Essential genes	0.221883	D		SRR11561273	BE4-rAPOBEC1	Essential genes	0.746751	E
																								SRR10523746	RESCUE+S375A	9th	0.1951	A		SRR10523746	RESCUE+S375A	9th	0.106649	A		SRR8909007	K20A/R21A	Oncogenes	0.173123	D		SRR11561324	BE4-rAPOBEC1	Essential genes	0.764699	E
																								SRR10523704	RESCUE	9th	0.751993	A		SRR10523704	RESCUE	9th	0.148695	A		SRR8909019	K20A/R21A	Oncogenes	0.19558	D		SRR11561298	BE4-rAPOBEC1	Oncogenes	0.939305	E
																								SRR10523724	RESCUE	9th	0.774875	A		SRR10523724	RESCUE	9th	0.152954	A		SRR8908977	K20A/R21A	Oncogenes	0.104064	D		SRR11561299	BE4-rAPOBEC1	Oncogenes	0.95556	E
																								SRR10523764	RESCUE+S375C	9th	0.265378	A		SRR10523764	RESCUE+S375C	9th	0.10903	A		SRR8909013	K20A/R21A	Oncogenes	0.186108	D		SRR11561297	BE4-rAPOBEC1	Oncogenes	0.936799	E
																								SRR10523749	REPAIRv1(N81S)	9th	0.299553	A		SRR10523749	REPAIRv1(N81S)	9th	0.0769224	A		SRR8908987	K20A/R21A	Oncogenes	0.214512	D		SRR11561323	BE4-rAPOBEC1	Oncogenes	0.999496	E
																								SRR10523717	RESCUE+S375A	9th	0.19451	A		SRR10523717	RESCUE+S375A	9th	0.105362	A		SRR8908992	K20A/R21A	Oncogenes	0.145283	D		SRR11561324	BE4-rAPOBEC1	Oncogenes	0.996405	E
																								SRR10523760	RESCUE+S375C	9th	0.260761	A		SRR10523760	RESCUE+S375C	9th	0.108668	A		SRR8908997	K20A/R21A	Oncogenes	0.210009	D		SRR11561273	BE4-rAPOBEC1	Oncogenes	0.954288	E
																								SRR10523761	RESCUE+S375N	9th	0.453527	A		SRR10523761	RESCUE+S375N	9th	0.10812	A		SRR8909002	K20A/R21A	Oncogenes	0.225542	D		SRR11561298	BE4-rAPOBEC1	ClinVar	0.798267	E
																								SRR10523733	REPAIRv2	9th	0.0996842	A		SRR10523733	REPAIRv2	9th	0.0753293	A		SRR8908982	K20A/R21A	Oncogenes	0.214157	D		SRR11561299	BE4-rAPOBEC1	ClinVar	0.79394	E
																								SRR10523741	REPAIRv2	9th	0.127897	A		SRR10523741	REPAIRv2	9th	0.0766654	A		SRR8909007	K20A/R21A	ClinVar	0.1853	D		SRR11561297	BE4-rAPOBEC1	ClinVar	0.779097	E
																								SRR10523712	REPAIRv1(X85W)	9th	0.873856	A		SRR10523712	REPAIRv1(X85W)	9th	0.0754048	A		SRR8909019	K20A/R21A	ClinVar	0.236824	D		SRR11561323	BE4-rAPOBEC1	ClinVar	0.829413	E
																								SRR10523743	RESCUE+S375A	9th	0.196753	A		SRR10523743	RESCUE+S375A	9th	0.10574	A		SRR8908977	K20A/R21A	ClinVar	0.122384	D		SRR11561324	BE4-rAPOBEC1	ClinVar	0.836824	E
																								SRR10523722	REPAIRv2	9th	0.129191	A		SRR10523722	REPAIRv2	9th	0.0781318	A		SRR8909013	K20A/R21A	ClinVar	0.197271	D		SRR11561298	BE4-rAPOBEC1	CDS	0.710634	E
																								SRR10523713	RESCUE	9th	0.741126	A		SRR10523713	RESCUE	9th	0.148436	A		SRR8908987	K20A/R21A	ClinVar	0.249522	D		SRR11561299	BE4-rAPOBEC1	CDS	0.712644	E
																								SRR10523728	RESCUE+S375A	9th	0.179083	A		SRR10523728	RESCUE+S375A	9th	0.0994873	A		SRR8908992	K20A/R21A	ClinVar	0.156872	D		SRR11561297	BE4-rAPOBEC1	CDS	0.710767	E
																								SRR10523721	RESCUE	9th	0.769849	A		SRR10523721	RESCUE	9th	0.154125	A		SRR8908997	K20A/R21A	ClinVar	0.2482	D		SRR11561323	BE4-rAPOBEC1	CDS	0.727339	E
																								SRR10523759	RESCUE+S375A	9th	0.187653	A		SRR10523759	RESCUE+S375A	9th	0.102157	A		SRR8909002	K20A/R21A	ClinVar	0.265514	D		SRR11561324	BE4-rAPOBEC1	CDS	0.728573	E
																								SRR10523727	RESCUE+N473I	9th	0.366024	A		SRR10523727	RESCUE+N473I	9th	0.0987325	A		SRR8908982	K20A/R21A	ClinVar	0.259748	D		SRR11561321	BE4-rAPOBEC1-K34A-H122A	Essential genes	0.0529098	E
																								SRR10523725	RESCUE+N473I	9th	0.448268	A		SRR10523725	RESCUE+N473I	9th	0.103575	A		SRR8909007	K20A/R21A	CDS	0.179983	D		SRR11561322	BE4-rAPOBEC1-K34A-H122A	Essential genes	0.0526227	E
																								SRR10523737	RESCUE+S375A	9th	0.210198	A		SRR10523737	RESCUE+S375A	9th	0.104433	A		SRR8909019	K20A/R21A	CDS	0.207305	D		SRR11561318	BE4-rAPOBEC1-K34A-H122A	Essential genes	0.0501331	E
																								SRR10523758	RESCUE+N473I	9th	0.422243	A		SRR10523758	RESCUE+N473I	9th	0.0997352	A		SRR8908977	K20A/R21A	CDS	0.107765	D		SRR11561320	BE4-rAPOBEC1-K34A-H122A	Essential genes	0.0516896	E
																								SRR10523718	RESCUE+S375C	9th	0.262603	A		SRR10523718	RESCUE+S375C	9th	0.109118	A		SRR8909013	K20A/R21A	CDS	0.193703	D		SRR11561319	BE4-rAPOBEC1-K34A-H122A	Essential genes	0.0514803	E
																								SRR10523763	RESCUE+S375A	9th	0.220183	A		SRR10523763	RESCUE+S375A	9th	0.107264	A		SRR8908987	K20A/R21A	CDS	0.224862	D		SRR11561317	BE4-rAPOBEC1-K34A-H122A	Essential genes	0.0501136	E
																								SRR10523736	RESCUE+N473I	9th	0.370534	A		SRR10523736	RESCUE+N473I	9th	0.0958414	A		SRR8908992	K20A/R21A	CDS	0.152886	D		SRR11561321	BE4-rAPOBEC1-K34A-H122A	Oncogenes	0.0611334	E
																								SRR10523702	REPAIRv1(N81S)	9th	0.343777	A		SRR10523702	REPAIRv1(N81S)	9th	0.0777226	A		SRR8908997	K20A/R21A	CDS	0.221136	D		SRR11561322	BE4-rAPOBEC1-K34A-H122A	Oncogenes	0.0609554	E
																								SRR10523744	RESCUE	9th	0.797328	A		SRR10523744	RESCUE	9th	0.157626	A		SRR8909002	K20A/R21A	CDS	0.23558	D		SRR11561318	BE4-rAPOBEC1-K34A-H122A	Oncogenes	0.0563192	E
																								SRR10523745	RESCUE+N473I	9th	0.471336	A		SRR10523745	RESCUE+N473I	9th	0.107121	A		SRR8908982	K20A/R21A	CDS	0.222778	D		SRR11561320	BE4-rAPOBEC1-K34A-H122A	Oncogenes	0.0594717	E
																								SRR10523766	REPAIRv1(N81S)	9th	0.305792	A		SRR10523766	REPAIRv1(N81S)	9th	0.0773996	A		SRR8909001	miniABEmax	Essential genes	1.11121	D		SRR11561317	BE4-rAPOBEC1-K34A-H122A	Oncogenes	0.0562538	E
																								SRR10523738	RESCUE+S375C	9th	0.255888	A		SRR10523738	RESCUE+S375C	9th	0.107054	A		SRR8908996	miniABEmax	Essential genes	1.02468	D		SRR11561319	BE4-rAPOBEC1-K34A-H122A	Oncogenes	0.0592221	E
																								SRR10523730	RESCUE+S375N	9th	0.424421	A		SRR10523730	RESCUE+S375N	9th	0.105962	A		SRR8909018	miniABEmax	Essential genes	0.84879	D		SRR11561321	BE4-rAPOBEC1-K34A-H122A	ClinVar	0.0417325	E
																								SRR10523710	REPAIRv1(X85W)	9th	0.861492	A		SRR10523710	REPAIRv1(X85W)	9th	0.0777541	A		SRR8909006	miniABEmax	Essential genes	0.948284	D		SRR11561322	BE4-rAPOBEC1-K34A-H122A	ClinVar	0.0422172	E
																								SRR10523706	RESCUE+S375A	9th	0.184303	A		SRR10523706	RESCUE+S375A	9th	0.101182	A		SRR8909012	miniABEmax	Essential genes	0.719487	D		SRR11561318	BE4-rAPOBEC1-K34A-H122A	ClinVar	0.0392026	E
																								SRR10523753	REPAIRv1(N81S)	9th	0.316197	A		SRR10523753	REPAIRv1(N81S)	9th	0.0798492	A		SRR8908976	miniABEmax	Essential genes	0.52966	D		SRR11561320	BE4-rAPOBEC1-K34A-H122A	ClinVar	0.0413277	E
																								SRR10523719	RESCUE+S375N	9th	0.485611	A		SRR10523719	RESCUE+S375N	9th	0.110955	A		SRR8908981	miniABEmax	Essential genes	1.04397	D		SRR11561319	BE4-rAPOBEC1-K34A-H122A	ClinVar	0.0419674	E
																								SRR10523755	REPAIRv2	9th	0.130488	A		SRR10523755	REPAIRv2	9th	0.0780691	A		SRR8908986	miniABEmax	Essential genes	0.930959	D		SRR11561317	BE4-rAPOBEC1-K34A-H122A	ClinVar	0.0382941	E
																								SRR10523752	RESCUE+S375N	9th	0.460312	A		SRR10523752	RESCUE+S375N	9th	0.108771	A		SRR8908991	miniABEmax	Essential genes	0.60523	D		SRR11561321	BE4-rAPOBEC1-K34A-H122A	CDS	0.0527783	E
																								SRR10523748	RESCUE+S375N	9th	0.495508	A		SRR10523748	RESCUE+S375N	9th	0.11483	A		SRR8909001	miniABEmax	Oncogenes	1.08191	D		SRR11561322	BE4-rAPOBEC1-K34A-H122A	CDS	0.0526184	E
																								SRR10523751	RESCUE+S375C	9th	0.259413	A		SRR10523751	RESCUE+S375C	9th	0.106804	A		SRR8908996	miniABEmax	Oncogenes	0.981033	D		SRR11561318	BE4-rAPOBEC1-K34A-H122A	CDS	0.0499714	E
																								SRR6686543	2BoxB-No enzyme	10th	0.0411643	B		SRR8910101	hA3A-BE3	10th	0.977675	D		SRR8909018	miniABEmax	Oncogenes	0.803806	D		SRR11561320	BE4-rAPOBEC1-K34A-H122A	CDS	0.0517597	E
																								SRR6686541	No guide-4LN-DD E488Q NLS	10th	0.22253	B		SRR8910103	hAID-BE3	10th	0.0649395	D		SRR8909006	miniABEmax	Oncogenes	0.902199	D		SRR11561319	BE4-rAPOBEC1-K34A-H122A	CDS	0.0517218	E
																								SRR6686539	2BoxB-4LN-DD	10th	0.383833	B		SRR8909015	GFP	10th	0.0430606	D		SRR8909012	miniABEmax	Oncogenes	0.683698	D		SRR11561317	BE4-rAPOBEC1-K34A-H122A	CDS	0.0500156	E
																								SRR6686542	2BoxB-4LN-DD E488Q NLS	10th	0.493418	B		SRR8910098	eA3A-BE3	10th	0.0691614	D		SRR8908976	miniABEmax	Oncogenes	0.511992	D		SRR11561291	BE4-RrA3F	Essential genes	0.0425061	E
																								SRR6686537	2BoxB-4LN-DD E488Q	10th	0.919835	B		SRR8910095	hAID-BE3	10th	0.0622261	D		SRR8908981	miniABEmax	Oncogenes	1.0156	D		SRR11561293	BE4-RrA3F	Essential genes	0.0428675	E
																								SRR6686538	No guide-No enzyme	10th	0.049063	B		SRR8910102	eA3A-BE3	10th	0.0657595	D		SRR8908986	miniABEmax	Oncogenes	0.929797	D		SRR11561292	BE4-RrA3F	Essential genes	0.0429834	E
																								SRR6686540	No guide-4LN-DD NLS	10th	0.0408237	B		SRR8910093	hA3A-BE3	10th	0.909686	D		SRR8908991	miniABEmax	Oncogenes	0.578474	D		SRR11561290	BE4-RrA3F	Essential genes	0.0427932	E
																								SRR6686536	2BoxB-4LN-DD NLS	10th	0.181177	B		SRR8909009	GFP	10th	0.0386628	D		SRR8909001	miniABEmax	ClinVar	1.2696	D		SRR11561287	BE4-RrA3F	Essential genes	0.0435507	E
																								SRR6686542	2BoxB-4LN-DD E488Q NLS	4th	0.354538	B		SRR8910099	hAID-BE3	10th	0.063146	D		SRR8908996	miniABEmax	ClinVar	1.17794	D		SRR11561288	BE4-RrA3F	Essential genes	0.0435638	E
																								SRR6686537	2BoxB-4LN-DD E488Q	4th	0.805663	B		SRR8910104	GFP	10th	0.0462641	D		SRR8909018	miniABEmax	ClinVar	0.96968	D		SRR11561291	BE4-RrA3F	Oncogenes	0.04768	E
																								SRR6686539	2BoxB-4LN-DD	4th	0.32167	B		SRR8910097	hA3A-BE3	10th	0.899643	D		SRR8909006	miniABEmax	ClinVar	1.07104	D		SRR11561293	BE4-RrA3F	Oncogenes	0.0489072	E
																								SRR6686543	2BoxB-No enzyme	4th	0.0452972	B		SRR8909021	GFP	10th	0.0398996	D		SRR8909012	miniABEmax	ClinVar	0.844369	D		SRR11561292	BE4-RrA3F	Oncogenes	0.0487487	E
																								SRR6686538	No guide-No enzyme	4th	0.0556272	B		SRR8910094	eA3A-BE3	10th	0.0692945	D		SRR8908976	miniABEmax	ClinVar	0.60233	D		SRR11561290	BE4-RrA3F	Oncogenes	0.0478267	E
																								SRR6686540	No guide-4LN-DD NLS	4th	0.0439187	B		SRR8910101	hA3A-BE3	4th	0.935548	D		SRR8908981	miniABEmax	ClinVar	1.25173	D		SRR11561287	BE4-RrA3F	Oncogenes	0.0480647	E
																								SRR6686541	No guide-4LN-DD E488Q NLS	4th	0.164651	B		SRR8910103	hAID-BE3	4th	0.0766729	D		SRR8908986	miniABEmax	ClinVar	1.13292	D		SRR11561288	BE4-RrA3F	Oncogenes	0.0480268	E
																								SRR6686536	2BoxB-4LN-DD NLS	4th	0.151683	B		SRR8909015	GFP	4th	0.0521743	D		SRR8908991	miniABEmax	ClinVar	0.690319	D		SRR11561291	BE4-RrA3F	ClinVar	0.0338665	E
																								SRR6686542	2BoxB-4LN-DD E488Q NLS	5th	0.327249	B		SRR8910098	eA3A-BE3	4th	0.0701928	D		SRR8909001	miniABEmax	CDS	1.1271	D		SRR11561293	BE4-RrA3F	ClinVar	0.0308882	E
																								SRR6686543	2BoxB-No enzyme	5th	0.039728	B		SRR8910095	hAID-BE3	4th	0.0725152	D		SRR8908996	miniABEmax	CDS	1.03275	D		SRR11561292	BE4-RrA3F	ClinVar	0.032382	E
																								SRR6686538	No guide-No enzyme	5th	0.0485567	B		SRR8910093	hA3A-BE3	4th	0.873696	D		SRR8909006	miniABEmax	CDS	0.94373	D		SRR11561290	BE4-RrA3F	ClinVar	0.0345516	E
																								SRR6686537	2BoxB-4LN-DD E488Q	5th	0.753796	B		SRR8910102	eA3A-BE3	4th	0.0655232	D		SRR8909018	miniABEmax	CDS	0.8446	D		SRR11561287	BE4-RrA3F	ClinVar	0.0298335	E
																								SRR6686539	2BoxB-4LN-DD	5th	0.29866	B		SRR8910099	hAID-BE3	4th	0.0740938	D		SRR8909012	miniABEmax	CDS	0.720494	D		SRR11561288	BE4-RrA3F	ClinVar	0.0285371	E
																								SRR6686540	No guide-4LN-DD NLS	5th	0.0380003	B		SRR8909009	GFP	4th	0.0485067	D		SRR8908976	miniABEmax	CDS	0.532926	D		SRR11561291	BE4-RrA3F	CDS	0.0436295	E
																								SRR6686541	No guide-4LN-DD E488Q NLS	5th	0.1539	B		SRR8910104	GFP	4th	0.0528976	D		SRR8908981	miniABEmax	CDS	1.05807	D		SRR11561293	BE4-RrA3F	CDS	0.0435242	E
																								SRR6686536	2BoxB-4LN-DD NLS	5th	0.137105	B		SRR8910097	hA3A-BE3	4th	0.865063	D		SRR8908986	miniABEmax	CDS	0.9585	D		SRR11561292	BE4-RrA3F	CDS	0.0435415	E
																								SRR6686542	2BoxB-4LN-DD E488Q NLS	6th	0.663016	B		SRR8909021	GFP	4th	0.0479564	D		SRR8908991	miniABEmax	CDS	0.607304	D		SRR11561290	BE4-RrA3F	CDS	0.0437871	E
																								SRR6686538	No guide-No enzyme	6th	0.0537288	B		SRR8910094	eA3A-BE3	4th	0.070066	D		SRR8909014	V82G	Essential genes	0.114329	D		SRR11561287	BE4-RrA3F	CDS	0.0438757	E
																								SRR6686543	2BoxB-No enzyme	6th	0.0457729	B		SRR8910101	hA3A-BE3	5th	0.944671	D		SRR8908983	V82G	Essential genes	0.143353	D		SRR11561288	BE4-RrA3F	CDS	0.0437885	E
																								SRR6686537	2BoxB-4LN-DD E488Q	6th	1.07596	B		SRR8910103	hAID-BE3	5th	0.0704673	D		SRR8908978	V82G	Essential genes	0.0985107	D		SRR11561280	BE4-SsAPOBEC3B	Essential genes	0.0475575	E
																								SRR6686539	2BoxB-4LN-DD	6th	0.471173	B		SRR8909015	GFP	5th	0.0529666	D		SRR8908988	V82G	Essential genes	0.144509	D		SRR11561276	BE4-SsAPOBEC3B	Essential genes	0.0480553	E
																								SRR6686540	No guide-4LN-DD NLS	6th	0.0453736	B		SRR8910098	eA3A-BE3	5th	0.0652704	D		SRR8909008	V82G	Essential genes	0.10475	D		SRR11561279	BE4-SsAPOBEC3B	Essential genes	0.0478529	E
																								SRR6686536	2BoxB-4LN-DD NLS	6th	0.231079	B		SRR8910095	hAID-BE3	5th	0.0683596	D		SRR8908998	V82G	Essential genes	0.114237	D		SRR11561274	BE4-SsAPOBEC3B	Essential genes	0.0488462	E
																								SRR6686541	No guide-4LN-DD E488Q NLS	6th	0.307623	B		SRR8910102	eA3A-BE3	5th	0.0642829	D		SRR8909003	V82G	Essential genes	0.114709	D		SRR11561277	BE4-SsAPOBEC3B	Essential genes	0.0478052	E
																								SRR6686542	2BoxB-4LN-DD E488Q NLS	7th	0.296488	B		SRR8910093	hA3A-BE3	5th	0.882101	D		SRR8908993	V82G	Essential genes	0.0999049	D		SRR11561275	BE4-SsAPOBEC3B	Essential genes	0.0487059	E
																								SRR6686543	2BoxB-No enzyme	7th	0.0405155	B		SRR8910099	hAID-BE3	5th	0.0676383	D		SRR8909020	V82G	Essential genes	0.122189	D		SRR11561280	BE4-SsAPOBEC3B	Oncogenes	0.0519646	E
																								SRR6686537	2BoxB-4LN-DD E488Q	7th	0.709066	B		SRR8909009	GFP	5th	0.0464292	D		SRR8909014	V82G	Oncogenes	0.117494	D		SRR11561276	BE4-SsAPOBEC3B	Oncogenes	0.0529846	E
																								SRR6686539	2BoxB-4LN-DD	7th	0.282071	B		SRR8910104	GFP	5th	0.0512857	D		SRR8908983	V82G	Oncogenes	0.143506	D		SRR11561279	BE4-SsAPOBEC3B	Oncogenes	0.0526181	E
																								SRR6686541	No guide-4LN-DD E488Q NLS	7th	0.141307	B		SRR8910097	hA3A-BE3	5th	0.87143	D		SRR8908978	V82G	Oncogenes	0.100554	D		SRR11561274	BE4-SsAPOBEC3B	Oncogenes	0.0533721	E
																								SRR6686538	No guide-No enzyme	7th	0.049453	B		SRR8909021	GFP	5th	0.0479262	D		SRR8908988	V82G	Oncogenes	0.14527	D		SRR11561277	BE4-SsAPOBEC3B	Oncogenes	0.0532987	E
																								SRR6686540	No guide-4LN-DD NLS	7th	0.0400119	B		SRR8910094	eA3A-BE3	5th	0.0673045	D		SRR8909008	V82G	Oncogenes	0.108413	D		SRR11561275	BE4-SsAPOBEC3B	Oncogenes	0.0531687	E
																								SRR6686536	2BoxB-4LN-DD NLS	7th	0.12316	B		SRR8910101	hA3A-BE3	6th	0.845131	D		SRR8908998	V82G	Oncogenes	0.11718	D		SRR11561280	BE4-SsAPOBEC3B	ClinVar	0.0359595	E
																								SRR6686539	2BoxB-4LN-DD	8th	0.291389	B		SRR8910103	hAID-BE3	6th	0.072773	D		SRR8909003	V82G	Oncogenes	0.11731	D		SRR11561276	BE4-SsAPOBEC3B	ClinVar	0.037219	E
																								SRR6686542	2BoxB-4LN-DD E488Q NLS	8th	0.311924	B		SRR8909015	GFP	6th	0.0562075	D		SRR8908993	V82G	Oncogenes	0.103851	D		SRR11561279	BE4-SsAPOBEC3B	ClinVar	0.0355484	E
																								SRR6686538	No guide-No enzyme	8th	0.0462808	B		SRR8910098	eA3A-BE3	6th	0.0605767	D		SRR8909020	V82G	Oncogenes	0.124852	D		SRR11561274	BE4-SsAPOBEC3B	ClinVar	0.0383338	E
																								SRR6686537	2BoxB-4LN-DD E488Q	8th	0.734573	B		SRR8910095	hAID-BE3	6th	0.0706623	D		SRR8909014	V82G	ClinVar	0.145864	D		SRR11561277	BE4-SsAPOBEC3B	ClinVar	0.0338096	E
																								SRR6686543	2BoxB-No enzyme	8th	0.0401122	B		SRR8910093	hA3A-BE3	6th	0.782301	D		SRR8908983	V82G	ClinVar	0.184835	D		SRR11561280	BE4-SsAPOBEC3B	CDS	0.0483621	E
																								SRR6686536	2BoxB-4LN-DD NLS	8th	0.129387	B		SRR8910102	eA3A-BE3	6th	0.0575102	D		SRR8908978	V82G	ClinVar	0.118018	D		SRR11561276	BE4-SsAPOBEC3B	CDS	0.0482991	E
																								SRR6686541	No guide-4LN-DD E488Q NLS	8th	0.147878	B		SRR8910099	hAID-BE3	6th	0.0688212	D		SRR8908988	V82G	ClinVar	0.169955	D		SRR11561279	BE4-SsAPOBEC3B	CDS	0.0485396	E
																								SRR6686540	No guide-4LN-DD NLS	8th	0.0388972	B		SRR8909009	GFP	6th	0.0507729	D		SRR8909008	V82G	ClinVar	0.123683	D		SRR11561274	BE4-SsAPOBEC3B	CDS	0.0491266	E
																								SRR6686542	2BoxB-4LN-DD E488Q NLS	9th	0.352739	B		SRR8910104	GFP	6th	0.0729768	D		SRR8908998	V82G	ClinVar	0.13297	D		SRR11561277	BE4-SsAPOBEC3B	CDS	0.0481139	E
																								SRR6686537	2BoxB-4LN-DD E488Q	9th	0.795003	B		SRR8910097	hA3A-BE3	6th	0.77907	D		SRR8909003	V82G	ClinVar	0.130195	D		SRR11561303	nCas9	Essential genes	0.0420676	E
																								SRR6686539	2BoxB-4LN-DD	9th	0.297228	B		SRR8909021	GFP	6th	0.0536988	D		SRR8908993	V82G	ClinVar	0.108331	D		SRR11561289	nCas9	Essential genes	0.0425312	E
																								SRR6686538	No guide-No enzyme	9th	0.0492788	B		SRR8910094	eA3A-BE3	6th	0.0601114	D		SRR8909020	V82G	ClinVar	0.146277	D		SRR11561325	nCas9	Essential genes	0.0423512	E
																								SRR6686543	2BoxB-No enzyme	9th	0.0407448	B		SRR8910101	hA3A-BE3	7th	0.974733	D		SRR8909014	V82G	CDS	0.114586	D		SRR11561278	nCas9	Essential genes	0.0426247	E
																								SRR6686541	No guide-4LN-DD E488Q NLS	9th	0.163351	B		SRR8910103	hAID-BE3	7th	0.0743707	D		SRR8908983	V82G	CDS	0.143567	D		SRR11561314	nCas9	Essential genes	0.0416928	E
																								SRR6686540	No guide-4LN-DD NLS	9th	0.0417255	B		SRR8909015	GFP	7th	0.0612201	D		SRR8908978	V82G	CDS	0.0990144	D		SRR11561326	nCas9	Essential genes	0.0424557	E
																								SRR6686536	2BoxB-4LN-DD NLS	9th	0.145163	B		SRR8910098	eA3A-BE3	7th	0.0860403	D		SRR8908988	V82G	CDS	0.144829	D		SRR11561303	nCas9	Oncogenes	0.0444544	E
																								SRR8979759	ABEmax	10th	0.465822	C		SRR8910095	hAID-BE3	7th	0.070314	D		SRR8908998	V82G	CDS	0.115471	D		SRR11561289	nCas9	Oncogenes	0.0447053	E
																								SRR8979756	ABEmaxAW	10th	0.246388	C		SRR8910093	hA3A-BE3	7th	0.908938	D		SRR8909008	V82G	CDS	0.105679	D		SRR11561325	nCas9	Oncogenes	0.045114	E
																								SRR8979755	ABEmaxAW	10th	0.252066	C		SRR8910102	eA3A-BE3	7th	0.0811457	D		SRR8909003	V82G	CDS	0.116301	D		SRR11561278	nCas9	Oncogenes	0.0447313	E
																								SRR8979762	ABEmaxAW	10th	0.24898	C		SRR8909009	GFP	7th	0.0542292	D		SRR8908993	V82G	CDS	0.10053	D		SRR11561314	nCas9	Oncogenes	0.0440749	E
																								SRR8979752	ABEmax(TadAE59A,TadA*E59A)	10th	0.213609	C		SRR8910099	hAID-BE3	7th	0.0703289	D		SRR8909020	V82G	CDS	0.122015	D		SRR11561326	nCas9	Oncogenes	0.0450797	E
																								SRR8979750	ABEmax(TadAE59A)	10th	0.312438	C		SRR8910104	GFP	7th	0.0714467	D		SRR6951146	ctrl	Essential genes	0.0190587	F		SRR11561303	nCas9	ClinVar	0.0315012	E
																								SRR8979749	ABEmax(TadAE59A,TadA*E59A)	10th	0.216528	C		SRR8909021	GFP	7th	0.0571595	D		SRR6951147	ctrl	Essential genes	0.0216586	F		SRR11561289	nCas9	ClinVar	0.0294668	E
																								SRR8979760	Cas9D10A	10th	0.207077	C		SRR8910097	hA3A-BE3	7th	0.900401	D		SRR6951146	ctrl	Oncogenes	0.0200878	F		SRR11561325	nCas9	ClinVar	0.0303936	E
																								SRR8979754	ABEmax	10th	0.440883	C		SRR8910094	eA3A-BE3	7th	0.0854515	D		SRR6951147	ctrl	Oncogenes	0.0242494	F		SRR11561314	nCas9	ClinVar	0.0279154	E
																								SRR8979753	ABEmax(TadAE59A)	10th	0.449413	C		SRR8910101	hA3A-BE3	8th	0.962386	D		SRR6951146	ctrl	ClinVar	0.0128165	F		SRR11561326	nCas9	ClinVar	0.0284629	E
																								SRR8979758	ABEmax(TadAE59A)	10th	0.388279	C		SRR8910103	hAID-BE3	8th	0.0621933	D		SRR6951147	ctrl	ClinVar	0.011239	F		SRR11561303	nCas9	CDS	0.0424838	E
																								SRR8979757	Cas9D10A	10th	0.214781	C		SRR8909015	GFP	8th	0.0432921	D		SRR6951147	ctrl	CDS	0.0239767	F		SRR11561289	nCas9	CDS	0.0428073	E
																								SRR8979761	ABEmax(TadAE59A,TadA*E59A)	10th	0.219993	C		SRR8910098	eA3A-BE3	8th	0.0578375	D		SRR6951146	ctrl	CDS	0.0214645	F		SRR11561325	nCas9	CDS	0.0429548	E
																								SRR8979748	Cas9D10A	10th	0.209071	C		SRR8910095	hAID-BE3	8th	0.0594435	D		SRR6951149	SA1+gRNA	Essential genes	0.0234684	F		SRR11561314	nCas9	CDS	0.0422681	E
																								SRR8979751	ABEmax	10th	0.421656	C		SRR8910093	hA3A-BE3	8th	0.897197	D		SRR6951148	SA1+gRNA	Essential genes	0.0244394	F		SRR11561326	nCas9	CDS	0.0429571	E
																								SRR8979759	ABEmax	4th	0.500085	C		SRR8910102	eA3A-BE3	8th	0.0565465	D		SRR6951149	SA1+gRNA	Oncogenes	0.0275276	F		SRR8790752	APOBEC1	Essential genes	0.546343	H
																								SRR8979762	ABEmaxAW	4th	0.259721	C		SRR8910099	hAID-BE3	8th	0.0594873	D		SRR6951148	SA1+gRNA	Oncogenes	0.026672	F		SRR8790752	APOBEC1	Oncogenes	0.58353	H
																								SRR8979755	ABEmaxAW	4th	0.260627	C		SRR8909009	GFP	8th	0.0385843	D		SRR6951149	SA1+gRNA	ClinVar	0.0182263	F		SRR8790754	APOBEC1	Oncogenes	0.650659	H
																								SRR8979756	ABEmaxAW	4th	0.253978	C		SRR8910104	GFP	8th	0.046068	D		SRR6951148	SA1+gRNA	ClinVar	0.0165168	F		SRR8790755	APOBEC1	Oncogenes	0.626848	H
																								SRR8979752	ABEmax(TadAE59A,TadA*E59A)	4th	0.216671	C		SRR8910097	hA3A-BE3	8th	0.885475	D		SRR6951149	SA1+gRNA	CDS	0.0262749	F		SRR8790752	APOBEC1	ClinVar	0.733009	H
																								SRR8979749	ABEmax(TadAE59A,TadA*E59A)	4th	0.215899	C		SRR8909021	GFP	8th	0.0393457	D		SRR6951148	SA1+gRNA	CDS	0.0268823	F		SRR8790754	APOBEC1	ClinVar	0.77042	H
																								SRR8979760	Cas9D10A	4th	0.208359	C		SRR8910094	eA3A-BE3	8th	0.0597812	D		SRR6951152	SA1Q	Essential genes	0.051817	F		SRR8790755	APOBEC1	ClinVar	0.794309	H
																								SRR8979750	ABEmax(TadAE59A)	4th	0.324738	C		SRR8910101	hA3A-BE3	9th	0.966749	D		SRR6951153	SA1Q	Essential genes	0.0577238	F		SRR8790752	APOBEC1	CDS	0.52117	H
																								SRR8979754	ABEmax	4th	0.46883	C		SRR8910103	hAID-BE3	9th	0.0674744	D		SRR6951153	SA1Q	Oncogenes	0.0629997	F		SRR8790754	APOBEC1	CDS	0.563933	H
																								SRR8979753	ABEmax(TadAE59A)	4th	0.481372	C		SRR8909015	GFP	9th	0.0474695	D		SRR6951152	SA1Q	Oncogenes	0.0577285	F		SRR8790755	APOBEC1	CDS	0.566759	H
																								SRR8979758	ABEmax(TadAE59A)	4th	0.410335	C		SRR8910098	eA3A-BE3	9th	0.0748647	D		SRR6951153	SA1Q	ClinVar	0.034657	F		SRR8790778	BE3	Oncogenes	0.32234	H
																								SRR8979761	ABEmax(TadAE59A,TadA*E59A)	4th	0.22065	C		SRR8910095	hAID-BE3	9th	0.0631858	D		SRR6951152	SA1Q	ClinVar	0.036685	F		SRR8790781	BE3	Oncogenes	0.459456	H
																								SRR8979757	Cas9D10A	4th	0.215313	C		SRR8910093	hA3A-BE3	9th	0.901737	D		SRR6951152	SA1Q	CDS	0.0560497	F		SRR8790779	BE3	Oncogenes	0.322344	H
																								SRR8979748	Cas9D10A	4th	0.209288	C		SRR8910102	eA3A-BE3	9th	0.0709978	D		SRR6951153	SA1Q	CDS	0.0622505	F		SRR8790778	BE3	ClinVar	0.485063	H
																								SRR8979751	ABEmax	4th	0.447685	C		SRR8909009	GFP	9th	0.0415457	D		SRR6951157	SA1Q+gRNA	Essential genes	0.0575834	F		SRR8790781	BE3	ClinVar	0.685932	H
																								SRR8979759	ABEmax	5th	0.482653	C		SRR8910099	hAID-BE3	9th	0.0627763	D		SRR6951156	SA1Q+gRNA	Essential genes	0.0622978	F		SRR8790779	BE3	ClinVar	0.512286	H
																								SRR8979755	ABEmaxAW	5th	0.255506	C		SRR8910104	GFP	9th	0.048334	D		SRR6951157	SA1Q+gRNA	Oncogenes	0.0633515	F		SRR8790778	BE3	CDS	0.330395	H
																								SRR8979756	ABEmaxAW	5th	0.249726	C		SRR8910097	hA3A-BE3	9th	0.891689	D		SRR6951156	SA1Q+gRNA	Oncogenes	0.0680237	F		SRR8790781	BE3	CDS	0.418124	H
																								SRR8979762	ABEmaxAW	5th	0.253371	C		SRR8909021	GFP	9th	0.0431583	D		SRR6951157	SA1Q+gRNA	ClinVar	0.0406245	F		SRR8790779	BE3	CDS	0.330471	H
																								SRR8979752	ABEmax(TadAE59A,TadA*E59A)	5th	0.213218	C		SRR8910094	eA3A-BE3	9th	0.0739493	D		SRR6951156	SA1Q+gRNA	ClinVar	0.0368132	F		SRR8790770	BE3(hA3A)-site 3	Oncogenes	0.109247	H
																								SRR8979749	ABEmax(TadAE59A,TadA*E59A)	5th	0.217031	C		SRR11561283	BE4-AmAPOBEC1	4th	0.0581397	E		SRR6951156	SA1Q+gRNA	CDS	0.067629	F		SRR8790768	BE3(hA3A)-site 3	Oncogenes	0.100231	H
																								SRR8979760	Cas9D10A	5th	0.208511	C		SRR11561291	BE4-RrA3F	4th	0.0545582	E		SRR6951157	SA1Q+gRNA	CDS	0.0621133	F		SRR8790769	BE3(hA3A)-site 3	Oncogenes	0.101575	H
																								SRR8979750	ABEmax(TadAE59A)	5th	0.319269	C		SRR11561303	nCas9	4th	0.0538231	E		SRR6951151	SA2+gRNA	Essential genes	0.0244924	F		SRR8790770	BE3(hA3A)-site 3	ClinVar	0.147641	H
																								SRR8979754	ABEmax	5th	0.458218	C		SRR11561285	BE4-AmAPOBEC1	4th	0.0587884	E		SRR6951150	SA2+gRNA	Essential genes	0.0240502	F		SRR8790768	BE3(hA3A)-site 3	ClinVar	0.118918	H
																								SRR8979753	ABEmax(TadAE59A)	5th	0.46302	C		SRR11561280	BE4-SsAPOBEC3B	4th	0.0599157	E		SRR6951151	SA2+gRNA	Oncogenes	0.0273016	F		SRR8790769	BE3(hA3A)-site 3	ClinVar	0.124864	H
																								SRR8979758	ABEmax(TadAE59A)	5th	0.401004	C		SRR11561309	BE4-PpAPOBEC1-R33A	4th	0.058509	E		SRR6951150	SA2+gRNA	Oncogenes	0.026846	F		SRR8790770	BE3(hA3A)-site 3	CDS	0.124078	H
																								SRR8979761	ABEmax(TadAE59A,TadA*E59A)	5th	0.218609	C		SRR11561321	BE4-rAPOBEC1-K34A-H122A	4th	0.0653284	E		SRR6951151	SA2+gRNA	ClinVar	0.00985171	F		SRR8790768	BE3(hA3A)-site 3	CDS	0.114006	H
																								SRR8979757	Cas9D10A	5th	0.215556	C		SRR11561293	BE4-RrA3F	4th	0.0548694	E		SRR6951150	SA2+gRNA	ClinVar	0.0186417	F		SRR8790769	BE3(hA3A)-site 3	CDS	0.109703	H
																								SRR8979751	ABEmax	5th	0.440052	C		SRR11561322	BE4-rAPOBEC1-K34A-H122A	4th	0.065089	E		SRR6951151	SA2+gRNA	CDS	0.0277335	F		SRR9027802	BE3(hA3AR128A)-site 3	Oncogenes	0.052015	H
																								SRR8979748	Cas9D10A	5th	0.208216	C		SRR11561298	BE4-rAPOBEC1	4th	0.683161	E		SRR6951150	SA2+gRNA	CDS	0.0275706	F		SRR9027794	BE3(hA3AR128A)-site 3	Oncogenes	0.0517657	H
																								SRR8979759	ABEmax	6th	0.485181	C		SRR11561282	BE4-AmAPOBEC1	4th	0.0625159	E		SRR6951155	SA2Q	Essential genes	0.0585049	F		SRR9027793	BE3(hA3AR128A)-site 3	Oncogenes	0.0520543	H
																								SRR8979755	ABEmaxAW	6th	0.257495	C		SRR11561318	BE4-rAPOBEC1-K34A-H122A	4th	0.0623783	E		SRR6951154	SA2Q	Essential genes	0.0568552	F		SRR9027802	BE3(hA3AR128A)-site 3	ClinVar	0.051422	H
																								SRR8979756	ABEmaxAW	6th	0.250317	C		SRR11561289	nCas9	4th	0.0557103	E		SRR6951155	SA2Q	Oncogenes	0.0520845	F		SRR9027794	BE3(hA3AR128A)-site 3	ClinVar	0.0448229	H
																								SRR8979762	ABEmaxAW	6th	0.254192	C		SRR11561325	nCas9	4th	0.0546003	E		SRR6951154	SA2Q	Oncogenes	0.0496704	F		SRR9027793	BE3(hA3AR128A)-site 3	ClinVar	0.0489794	H
																								SRR8979752	ABEmax(TadAE59A,TadA*E59A)	6th	0.21704	C		SRR11561299	BE4-rAPOBEC1	4th	0.698376	E		SRR6951155	SA2Q	ClinVar	0.0441012	F		SRR9027802	BE3(hA3AR128A)-site 3	CDS	0.0515142	H
																								SRR8979749	ABEmax(TadAE59A,TadA*E59A)	6th	0.220309	C		SRR11561302	BE4-PpAPOBEC1-H122A	4th	0.0881605	E		SRR6951154	SA2Q	ClinVar	0.035752	F		SRR9027794	BE3(hA3AR128A)-site 3	CDS	0.0505986	H
																								SRR8979760	Cas9D10A	6th	0.209773	C		SRR11561314	nCas9	4th	0.0531312	E		SRR6951155	SA2Q	CDS	0.0689669	F		SRR9027793	BE3(hA3AR128A)-site 3	CDS	0.05041	H
																								SRR8979750	ABEmax(TadAE59A)	6th	0.320253	C		SRR11561284	BE4-AmAPOBEC1	4th	0.058937	E		SRR6951154	SA2Q	CDS	0.066671	F		SRR9027810	BE3(hA3AY130F)-site 3	Oncogenes	0.035072	H
																								SRR8979754	ABEmax	6th	0.458204	C		SRR11561292	BE4-RrA3F	4th	0.0551338	E		SRR6951158	SA2Q+gRNA	Essential genes	0.0590581	F		SRR9027808	BE3(hA3AY130F)-site 3	Oncogenes	0.0363026	H
																								SRR8979753	ABEmax(TadAE59A)	6th	0.463638	C		SRR11561315	BE4-PpAPOBEC1	4th	0.0776001	E		SRR6951159	SA2Q+gRNA	Essential genes	0.0607127	F		SRR9027807	BE3(hA3AY130F)-site 3	Oncogenes	0.0359462	H
																								SRR8979758	ABEmax(TadAE59A)	6th	0.39865	C		SRR11561290	BE4-RrA3F	4th	0.0545833	E		SRR6951158	SA2Q+gRNA	Oncogenes	0.0536703	F		SRR9027810	BE3(hA3AY130F)-site 3	ClinVar	0.0209039	H
																								SRR8979761	ABEmax(TadAE59A,TadA*E59A)	6th	0.222858	C		SRR11561304	BE4-PpAPOBEC1-R33A	4th	0.0576958	E		SRR6951159	SA2Q+gRNA	Oncogenes	0.0537444	F		SRR9027808	BE3(hA3AY130F)-site 3	ClinVar	0.0225257	H
																								SRR8979757	Cas9D10A	6th	0.217404	C		SRR11561326	nCas9	4th	0.0548697	E		SRR6951158	SA2Q+gRNA	ClinVar	0.0335632	F		SRR9027807	BE3(hA3AY130F)-site 3	ClinVar	0.0216394	H
																								SRR8979748	Cas9D10A	6th	0.211366	C		SRR11561295	BE4-PpAPOBEC1-H122A	4th	0.0828074	E		SRR6951159	SA2Q+gRNA	ClinVar	0.031424	F		SRR9027810	BE3(hA3AY130F)-site 3	CDS	0.0304336	H
																								SRR8979751	ABEmax	6th	0.438046	C		SRR11561297	BE4-rAPOBEC1	4th	0.684368	E		SRR6951159	SA2Q+gRNA	CDS	0.0707597	F		SRR9027808	BE3(hA3AY130F)-site 3	CDS	0.0314273	H
																								SRR8979759	ABEmax	7th	0.48731	C		SRR11561323	BE4-rAPOBEC1	4th	0.715099	E		SRR6951159	SA2Q+gRNA	CDS	0.0707597	F		SRR9027807	BE3(hA3AY130F)-site 3	CDS	0.0310357	H
																								SRR8979755	ABEmaxAW	7th	0.257914	C		SRR11561286	BE4-AmAPOBEC1	4th	0.0592215	E		SRR6951158	SA2Q+gRNA	CDS	0.0693148	F		SRR8790749	BE3(W90A)-site 3	Essential genes	0.0237345	H
																								SRR8979756	ABEmaxAW	7th	0.252171	C		SRR11561281	BE4-AmAPOBEC1	4th	0.0631999	E		SRR8326916	293T	Essential genes	0.0427232	G		SRR8790749	BE3(W90A)-site 3	Oncogenes	0.0286805	H
																								SRR8979762	ABEmaxAW	7th	0.252924	C		SRR11561276	BE4-SsAPOBEC3B	4th	0.0594411	E		SRR8326916	293T	Oncogenes	0.0467185	G		SRR8790748	BE3(W90A)-site 3	Oncogenes	0.0298133	H
																								SRR8979752	ABEmax(TadAE59A,TadA*E59A)	7th	0.217293	C		SRR11561308	BE4-PpAPOBEC1-R33A	4th	0.0588411	E		SRR8326916	293T	ClinVar	0.0256128	G		SRR8790771	BE3(W90A)-site 3	Oncogenes	0.0282912	H
																								SRR8979760	Cas9D10A	7th	0.209564	C		SRR11561305	BE4-PpAPOBEC1-R33A	4th	0.0575112	E		SRR8326916	293T	CDS	0.0445218	G		SRR8790749	BE3(W90A)-site 3	ClinVar	0.0160039	H
																								SRR8979749	ABEmax(TadAE59A,TadA*E59A)	7th	0.220035	C		SRR11561307	BE4-PpAPOBEC1-R33A	4th	0.056154	E		SRR8326936	ADAR2 - GluR2 adRNA	Essential genes	0.0868947	G		SRR8790748	BE3(W90A)-site 3	ClinVar	0.0163896	H
																								SRR8979750	ABEmax(TadAE59A)	7th	0.319705	C		SRR11561294	BE4-PpAPOBEC1-H122A	4th	0.0822592	E		SRR8326936	ADAR2 - GluR2 adRNA	Oncogenes	0.0927671	G		SRR8790771	BE3(W90A)-site 3	ClinVar	0.0119143	H
																								SRR8979754	ABEmax	7th	0.463353	C		SRR11561301	BE4-PpAPOBEC1-H122A	4th	0.0881124	E		SRR8326936	ADAR2 - GluR2 adRNA	ClinVar	0.0551442	G		SRR8790749	BE3(W90A)-site 3	CDS	0.0253436	H
																								SRR8979753	ABEmax(TadAE59A)	7th	0.461985	C		SRR11561279	BE4-SsAPOBEC3B	4th	0.0600693	E		SRR8326936	ADAR2 - GluR2 adRNA	CDS	0.143532	G		SRR8790748	BE3(W90A)-site 3	CDS	0.0269247	H
																								SRR8979758	ABEmax(TadAE59A)	7th	0.398361	C		SRR11561320	BE4-rAPOBEC1-K34A-H122A	4th	0.0619346	E		SRR8326939	ADAR2 (E488Q) +GluR2 adRNA	Essential genes	0.862318	G		SRR8790771	BE3(W90A)-site 3	CDS	0.0254571	H
																								SRR8979761	ABEmax(TadAE59A,TadA*E59A)	7th	0.221342	C		SRR11561287	BE4-RrA3F	4th	0.0571717	E		SRR8326939	ADAR2 (E488Q) +GluR2 adRNA	Oncogenes	0.887329	G		SRR8790760	BE3-RNF2	Oncogenes	0.137	H
																								SRR8979757	Cas9D10A	7th	0.217338	C		SRR11561319	BE4-rAPOBEC1-K34A-H122A	4th	0.062062	E		SRR8326939	ADAR2 (E488Q) +GluR2 adRNA	ClinVar	0.601534	G		SRR8790761	BE3-RNF2	Oncogenes	0.148824	H
																								SRR8979748	Cas9D10A	7th	0.211376	C		SRR11561274	BE4-SsAPOBEC3B	4th	0.0628284	E		SRR8326939	ADAR2 (E488Q) +GluR2 adRNA	CDS	2.1727	G		SRR8790759	BE3-RNF2	Oncogenes	0.153123	H
																								SRR8979751	ABEmax	7th	0.443278	C		SRR11561317	BE4-rAPOBEC1-K34A-H122A	4th	0.0617579	E		SRR8326937	ADAR2 + GluR2 adRNA	Essential genes	0.184606	G		SRR8790760	BE3-RNF2	ClinVar	0.188968	H
																								SRR8979759	ABEmax	8th	0.481047	C		SRR11561306	BE4-PpAPOBEC1-R33A	4th	0.0560897	E		SRR8326937	ADAR2 + GluR2 adRNA	Oncogenes	0.188498	G		SRR8790761	BE3-RNF2	ClinVar	0.220973	H
																								SRR8979755	ABEmaxAW	8th	0.255513	C		SRR11561312	BE4-PpAPOBEC1	4th	0.078109	E		SRR8326937	ADAR2 + GluR2 adRNA	ClinVar	0.121907	G		SRR8790759	BE3-RNF2	ClinVar	0.211333	H
																								SRR8979756	ABEmaxAW	8th	0.249723	C		SRR11561311	BE4-PpAPOBEC1	4th	0.0795965	E		SRR8326937	ADAR2 + GluR2 adRNA	CDS	0.380774	G		SRR8790760	BE3-RNF2	CDS	0.141794	H
																								SRR8979762	ABEmaxAW	8th	0.252524	C		SRR11561310	BE4-PpAPOBEC1	4th	0.0794513	E		SRR8326940	Cas13b-ADAR2 DD (E488Q) - gRNA	Essential genes	1.00605	G		SRR8790761	BE3-RNF2	CDS	0.156182	H
																								SRR8979752	ABEmax(TadAE59A,TadA*E59A)	8th	0.214448	C		SRR11561300	BE4-PpAPOBEC1-H122A	4th	0.0691368	E		SRR8326940	Cas13b-ADAR2 DD (E488Q) - gRNA	Oncogenes	0.895054	G		SRR8790759	BE3-RNF2	CDS	0.160366	H
																								SRR8979749	ABEmax(TadAE59A,TadA*E59A)	8th	0.218858	C		SRR11561288	BE4-RrA3F	4th	0.0571314	E		SRR8326940	Cas13b-ADAR2 DD (E488Q) - gRNA	ClinVar	0.924658	G		SRR8790758	BE3-site 3	Oncogenes	0.118944	H
																								SRR8979760	Cas9D10A	8th	0.20807	C		SRR11561277	BE4-SsAPOBEC3B	4th	0.0590145	E		SRR8326940	Cas13b-ADAR2 DD (E488Q) - gRNA	CDS	1.09471	G		SRR8790747	BE3-site 3	Oncogenes	0.118013	H
																								SRR8979750	ABEmax(TadAE59A)	8th	0.316063	C		SRR11561316	BE4-PpAPOBEC1	4th	0.0782202	E		SRR8326941	Cas13b-ADAR2 DD (E488Q) + gRNA	Essential genes	0.564585	G		SRR8790758	BE3-site 3	ClinVar	0.155743	H
																								SRR8979754	ABEmax	8th	0.458307	C		SRR11561296	BE4-PpAPOBEC1-H122A	4th	0.0686128	E		SRR8326941	Cas13b-ADAR2 DD (E488Q) + gRNA	Oncogenes	0.511768	G		SRR8790747	BE3-site 3	ClinVar	0.167871	H
																								SRR8979753	ABEmax(TadAE59A)	8th	0.460749	C		SRR11561324	BE4-rAPOBEC1	4th	0.715594	E		SRR8326941	Cas13b-ADAR2 DD (E488Q) + gRNA	ClinVar	0.524182	G		SRR8790758	BE3-site 3	CDS	0.12501	H
																								SRR8979761	ABEmax(TadAE59A,TadA*E59A)	8th	0.221696	C		SRR11561313	BE4-PpAPOBEC1	4th	0.0775802	E		SRR8326941	Cas13b-ADAR2 DD (E488Q) + gRNA	CDS	0.613535	G		SRR8790747	BE3-site 3	CDS	0.123275	H
																								SRR8979758	ABEmax(TadAE59A)	8th	0.394798	C		SRR11561283	BE4-AmAPOBEC1	5th	0.0459931	E		SRR8326944	GluR2 adRNA	Essential genes	0.0295412	G		SRR8790757	GFP	Essential genes	0.02543	H
																								SRR8979757	Cas9D10A	8th	0.215492	C		SRR11561285	BE4-AmAPOBEC1	5th	0.0452603	E		SRR8326944	GluR2 adRNA	Oncogenes	0.0354201	G		SRR8790757	GFP	Oncogenes	0.0317154	H
																								SRR8979748	Cas9D10A	8th	0.209744	C		SRR11561291	BE4-RrA3F	5th	0.0402991	E		SRR8326944	GluR2 adRNA	CDS	0.0315204	G		SRR8790756	GFP	Oncogenes	0.0319886	H
																								SRR8979751	ABEmax	8th	0.43883	C		SRR11561303	nCas9	5th	0.0395057	E		SRR8326945	gRNA	Essential genes	0.0281756	G		SRR8790777	GFP	Oncogenes	0.0302659	H
																								SRR8979759	ABEmax	9th	0.477752	C		SRR11561280	BE4-SsAPOBEC3B	5th	0.0451461	E		SRR8326945	gRNA	Oncogenes	0.0335978	G		SRR8790776	GFP	Oncogenes	0.0283931	H
																								SRR8979755	ABEmaxAW	9th	0.254828	C		SRR11561309	BE4-PpAPOBEC1-R33A	5th	0.0434628	E		SRR8326945	gRNA	CDS	0.0316602	G		SRR8790773	GFP	Oncogenes	0.0284752	H
																								SRR8979756	ABEmaxAW	9th	0.248752	C		SRR11561321	BE4-rAPOBEC1-K34A-H122A	5th	0.0502608	E		SRR8326922	MCP-ADAR1 DD (E1008Q)-NES - MS2 adRNA	Essential genes	1.94453	G		SRR8790772	GFP	Oncogenes	0.0303825	H
																								SRR8979762	ABEmaxAW	9th	0.251089	C		SRR11561293	BE4-RrA3F	5th	0.0405207	E		SRR8326922	MCP-ADAR1 DD (E1008Q)-NES - MS2 adRNA	Oncogenes	1.78526	G		SRR8790757	GFP	ClinVar	0.0140859	H
																								SRR8979752	ABEmax(TadAE59A,TadA*E59A)	9th	0.214095	C		SRR11561322	BE4-rAPOBEC1-K34A-H122A	5th	0.0502308	E		SRR8326922	MCP-ADAR1 DD (E1008Q)-NES - MS2 adRNA	ClinVar	1.71996	G		SRR8790756	GFP	ClinVar	0.0179873	H
																								SRR8979760	Cas9D10A	9th	0.207943	C		SRR11561298	BE4-rAPOBEC1	5th	0.719672	E		SRR8326922	MCP-ADAR1 DD (E1008Q)-NES - MS2 adRNA	CDS	2.0427	G		SRR8790777	GFP	ClinVar	0.0191932	H
																								SRR8979749	ABEmax(TadAE59A,TadA*E59A)	9th	0.21746	C		SRR11561282	BE4-AmAPOBEC1	5th	0.0459765	E		SRR8326923	MCP-ADAR1 DD (E1008Q)-NES + MS2 adRNA	Essential genes	1.74528	G		SRR8790776	GFP	ClinVar	0.0139686	H
																								SRR8979750	ABEmax(TadAE59A)	9th	0.316116	C		SRR11561318	BE4-rAPOBEC1-K34A-H122A	5th	0.0473815	E		SRR8326923	MCP-ADAR1 DD (E1008Q)-NES + MS2 adRNA	Oncogenes	1.60492	G		SRR8790773	GFP	ClinVar	0.0147176	H
																								SRR8979754	ABEmax	9th	0.454377	C		SRR11561289	nCas9	5th	0.0402878	E		SRR8326923	MCP-ADAR1 DD (E1008Q)-NES + MS2 adRNA	ClinVar	1.54453	G		SRR8790772	GFP	ClinVar	0.0146273	H
																								SRR8979753	ABEmax(TadAE59A)	9th	0.459139	C		SRR11561325	nCas9	5th	0.0399641	E		SRR8326923	MCP-ADAR1 DD (E1008Q)-NES + MS2 adRNA	CDS	1.84085	G		SRR8790757	GFP	CDS	0.0268041	H
																								SRR8979761	ABEmax(TadAE59A,TadA*E59A)	9th	0.220519	C		SRR11561299	BE4-rAPOBEC1	5th	0.735484	E		SRR8326924	MCP-ADAR1 DD (E1008Q)-NLS - MS2 adRNA	Essential genes	0.893655	G		SRR8790756	GFP	CDS	0.0270971	H
																								SRR8979758	ABEmax(TadAE59A)	9th	0.393879	C		SRR11561302	BE4-PpAPOBEC1-H122A	5th	0.0667018	E		SRR8326924	MCP-ADAR1 DD (E1008Q)-NLS - MS2 adRNA	Oncogenes	0.877138	G		SRR8790777	GFP	CDS	0.0286448	H
																								SRR8979757	Cas9D10A	9th	0.214935	C		SRR11561314	nCas9	5th	0.0392567	E		SRR8326924	MCP-ADAR1 DD (E1008Q)-NLS - MS2 adRNA	ClinVar	0.690153	G		SRR8790776	GFP	CDS	0.0278226	H
																								SRR8979751	ABEmax	9th	0.434582	C		SRR11561284	BE4-AmAPOBEC1	5th	0.046275	E		SRR8326924	MCP-ADAR1 DD (E1008Q)-NLS - MS2 adRNA	CDS	0.963013	G		SRR8790773	GFP	CDS	0.0266362	H
																								SRR8979748	Cas9D10A	9th	0.209364	C		SRR11561292	BE4-RrA3F	5th	0.0409316	E		SRR8326925	MCP-ADAR1 DD (E1008Q)-NLS +MS2 adRNA	Essential genes	1.06662	G		SRR8790772	GFP	CDS	0.0265708	H
																								SRR8909014	V82G	10th	0.127807	D		SRR11561315	BE4-PpAPOBEC1	5th	0.0651434	E		SRR8326925	MCP-ADAR1 DD (E1008Q)-NLS +MS2 adRNA	Oncogenes	1.02255	G		SRR8096306	BE3	Essential genes	3.68285	I
																								SRR8909011	ABEmax	10th	0.874345	D		SRR11561290	BE4-RrA3F	5th	0.0404057	E		SRR8326925	MCP-ADAR1 DD (E1008Q)-NLS +MS2 adRNA	ClinVar	0.955396	G		SRR8096262	BE3	Essential genes	3.73953	I
																								SRR8909007	K20A/R21A	10th	0.191361	D		SRR11561304	BE4-PpAPOBEC1-R33A	5th	0.0436089	E		SRR8326925	MCP-ADAR1 DD (E1008Q)-NLS +MS2 adRNA	CDS	1.14557	G		SRR8096302	BE3	Essential genes	3.06008	I
																								SRR8909017	ABEmax	10th	0.887062	D		SRR11561326	nCas9	5th	0.0400254	E		SRR8326918	MCP-ADAR1 DD-NES - MS2 adRNA	Essential genes	1.06286	G		SRR8096310	BE3	Essential genes	3.18399	I
																								SRR8909019	K20A/R21A	10th	0.218514	D		SRR11561295	BE4-PpAPOBEC1-H122A	5th	0.064031	E		SRR8326918	MCP-ADAR1 DD-NES - MS2 adRNA	Oncogenes	0.987989	G		SRR8096302	BE3	Oncogenes	3.05369	I
																								SRR8909001	miniABEmax	10th	1.14398	D		SRR11561297	BE4-rAPOBEC1	5th	0.719926	E		SRR8326918	MCP-ADAR1 DD-NES - MS2 adRNA	ClinVar	0.731572	G		SRR8096262	BE3	Oncogenes	3.86697	I
																								SRR8908977	K20A/R21A	10th	0.118081	D		SRR11561286	BE4-AmAPOBEC1	5th	0.0452954	E		SRR8326918	MCP-ADAR1 DD-NES - MS2 adRNA	CDS	1.08486	G		SRR8096306	BE3	Oncogenes	3.70266	I
																								SRR8908983	V82G	10th	0.156362	D		SRR11561323	BE4-rAPOBEC1	5th	0.751065	E		SRR8326919	MCP-ADAR1 DD-NES + MS2 adRNA	Essential genes	0.962918	G		SRR8096302	BE3	Oncogenes	3.05369	I
																								SRR8909013	K20A/R21A	10th	0.206739	D		SRR11561281	BE4-AmAPOBEC1	5th	0.0467086	E		SRR8326919	MCP-ADAR1 DD-NES + MS2 adRNA	Oncogenes	0.89218	G		SRR8096262	BE3	Oncogenes	3.86697	I
																								SRR8908987	K20A/R21A	10th	0.239382	D		SRR11561276	BE4-SsAPOBEC3B	5th	0.0453192	E		SRR8326919	MCP-ADAR1 DD-NES + MS2 adRNA	ClinVar	0.603635	G		SRR8096310	BE3	Oncogenes	3.12931	I
																								SRR8909015	GFP	10th	0.0422078	D		SRR11561308	BE4-PpAPOBEC1-R33A	5th	0.0432082	E		SRR8326919	MCP-ADAR1 DD-NES + MS2 adRNA	CDS	0.987674	G		SRR8096310	BE3	Oncogenes	3.12931	I
																								SRR8908978	V82G	10th	0.111164	D		SRR11561305	BE4-PpAPOBEC1-R33A	5th	0.0434912	E		SRR8326920	MCP-ADAR1 DD-NLS - MS2 adRNA	Essential genes	0.339872	G		SRR8096306	BE3	ClinVar	4.71039	I
																								SRR8909005	ABEmax	10th	0.911389	D		SRR11561307	BE4-PpAPOBEC1-R33A	5th	0.0428826	E		SRR8326920	MCP-ADAR1 DD-NLS - MS2 adRNA	Oncogenes	0.337326	G		SRR8096302	BE3	ClinVar	3.94545	I
																								SRR8908980	ABEmax	10th	0.982986	D		SRR11561294	BE4-PpAPOBEC1-H122A	5th	0.0633835	E		SRR8326920	MCP-ADAR1 DD-NLS - MS2 adRNA	ClinVar	0.208992	G		SRR8096262	BE3	ClinVar	4.79102	I
																								SRR8909018	miniABEmax	10th	0.858063	D		SRR11561301	BE4-PpAPOBEC1-H122A	5th	0.0666187	E		SRR8326920	MCP-ADAR1 DD-NLS - MS2 adRNA	CDS	0.359544	G		SRR8096310	BE3	ClinVar	4.02602	I
																								SRR8908996	miniABEmax	10th	1.04553	D		SRR11561320	BE4-rAPOBEC1-K34A-H122A	5th	0.049326	E		SRR8326921	MCP-ADAR1 DD-NLS + MS2 adRNA	Essential genes	0.406536	G		SRR8096306	BE3	CDS	3.68285	I
																								SRR8909012	miniABEmax	10th	0.732845	D		SRR11561279	BE4-SsAPOBEC3B	5th	0.0447346	E		SRR8326921	MCP-ADAR1 DD-NLS + MS2 adRNA	Oncogenes	0.398945	G		SRR8096262	BE3	CDS	3.73953	I
																								SRR8909006	miniABEmax	10th	0.95739	D		SRR11561287	BE4-RrA3F	5th	0.0411382	E		SRR8326921	MCP-ADAR1 DD-NLS + MS2 adRNA	ClinVar	0.245497	G		SRR8096302	BE3	CDS	3.06008	I
																								SRR8908988	V82G	10th	0.15848	D		SRR11561319	BE4-rAPOBEC1-K34A-H122A	5th	0.0492567	E		SRR8326921	MCP-ADAR1 DD-NLS + MS2 adRNA	CDS	0.423978	G		SRR8096310	BE3	CDS	3.18399	I
																								SRR8908985	ABEmax	10th	0.833454	D		SRR11561274	BE4-SsAPOBEC3B	5th	0.0456095	E		SRR8326928	MCP-ADAR2 DD (E488Q)-NES - MS2 adRNA	Essential genes	0.394979	G		SRR8096300	BE3-E63Q	Essential genes	0.0339399	I
																								SRR8908992	K20A/R21A	10th	0.164867	D		SRR11561317	BE4-rAPOBEC1-K34A-H122A	5th	0.0472642	E		SRR8326928	MCP-ADAR2 DD (E488Q)-NES - MS2 adRNA	Oncogenes	0.385898	G		SRR8096298	BE3-E63Q	Essential genes	0.0357792	I
																								SRR8908976	miniABEmax	10th	0.548659	D		SRR11561306	BE4-PpAPOBEC1-R33A	5th	0.0432514	E		SRR8326928	MCP-ADAR2 DD (E488Q)-NES - MS2 adRNA	ClinVar	0.314848	G		SRR8096263	BE3-E63Q	Essential genes	0.0371529	I
																								SRR8909009	GFP	10th	0.0371637	D		SRR11561312	BE4-PpAPOBEC1	5th	0.0659104	E		SRR8326928	MCP-ADAR2 DD (E488Q)-NES - MS2 adRNA	CDS	0.443331	G		SRR8096300	BE3-E63Q	Oncogenes	0.0311534	I
																								SRR8908990	ABEmax	10th	0.616798	D		SRR11561311	BE4-PpAPOBEC1	5th	0.0668596	E		SRR8326929	MCP-ADAR2 DD (E488Q)-NES + MS2 adRNA	Essential genes	0.458276	G		SRR8096298	BE3-E63Q	Oncogenes	0.0302487	I
																								SRR8908981	miniABEmax	10th	1.0695	D		SRR11561310	BE4-PpAPOBEC1	5th	0.0671051	E		SRR8326929	MCP-ADAR2 DD (E488Q)-NES + MS2 adRNA	Oncogenes	0.454364	G		SRR8096263	BE3-E63Q	Oncogenes	0.0345152	I
																								SRR8910104	GFP	10th	0.042275	D		SRR11561300	BE4-PpAPOBEC1-H122A	5th	0.0534643	E		SRR8326929	MCP-ADAR2 DD (E488Q)-NES + MS2 adRNA	ClinVar	0.358772	G		SRR8096298	BE3-E63Q	Oncogenes	0.0302487	I
																								SRR8909000	ABEmax	10th	0.984339	D		SRR11561316	BE4-PpAPOBEC1	5th	0.0652515	E		SRR8326929	MCP-ADAR2 DD (E488Q)-NES + MS2 adRNA	CDS	0.521167	G		SRR8096263	BE3-E63Q	Oncogenes	0.0345152	I
																								SRR8909008	V82G	10th	0.117392	D		SRR11561296	BE4-PpAPOBEC1-H122A	5th	0.0531064	E		SRR8326932	MCP-ADAR2 DD (E488Q)-NLS - MS2 adRNA	Essential genes	0.334883	G		SRR8096300	BE3-E63Q	ClinVar	0.0216575	I
																								SRR8908998	V82G	10th	0.12434	D		SRR11561288	BE4-RrA3F	5th	0.0408597	E		SRR8326932	MCP-ADAR2 DD (E488Q)-NLS - MS2 adRNA	Oncogenes	0.322426	G		SRR8096298	BE3-E63Q	ClinVar	0.0253609	I
																								SRR8909021	GFP	10th	0.0371236	D		SRR11561277	BE4-SsAPOBEC3B	5th	0.0448862	E		SRR8326932	MCP-ADAR2 DD (E488Q)-NLS - MS2 adRNA	ClinVar	0.271528	G		SRR8096263	BE3-E63Q	ClinVar	0.0286132	I
																								SRR8908986	miniABEmax	10th	0.962687	D		SRR11561324	BE4-rAPOBEC1	5th	0.751808	E		SRR8326932	MCP-ADAR2 DD (E488Q)-NLS - MS2 adRNA	CDS	0.374883	G		SRR8096300	BE3-E63Q	CDS	0.0339399	I
																								SRR8908975	ABEmax	10th	0.609	D		SRR11561313	BE4-PpAPOBEC1	5th	0.0661134	E		SRR8326933	MCP-ADAR2 DD (E488Q)-NLS + MS2 adRNA	Essential genes	0.428345	G		SRR8096298	BE3-E63Q	CDS	0.0357792	I
																								SRR8908997	K20A/R21A	10th	0.23507	D		SRR11561283	BE4-AmAPOBEC1	6th	0.050787	E		SRR8326933	MCP-ADAR2 DD (E488Q)-NLS + MS2 adRNA	Oncogenes	0.407026	G		SRR8096263	BE3-E63Q	CDS	0.0371529	I
																								SRR8908995	ABEmax	10th	0.921449	D		SRR11561291	BE4-RrA3F	6th	0.0455687	E		SRR8326933	MCP-ADAR2 DD (E488Q)-NLS + MS2 adRNA	ClinVar	0.345226	G		SRR8096267	BE3-R33A	Essential genes	0.176971	I
																								SRR8908991	miniABEmax	10th	0.618652	D		SRR11561285	BE4-AmAPOBEC1	6th	0.0508324	E		SRR8326933	MCP-ADAR2 DD (E488Q)-NLS + MS2 adRNA	CDS	0.479174	G		SRR8096311	BE3-R33A	Essential genes	0.13677	I
																								SRR8909003	V82G	10th	0.128573	D		SRR11561303	nCas9	6th	0.0450671	E		SRR8326926	MCP-ADAR2 DD-NES - MS2 adRNA	Essential genes	0.164099	G		SRR8096303	BE3-R33A	Essential genes	0.139406	I
																								SRR8909002	K20A/R21A	10th	0.247817	D		SRR11561280	BE4-SsAPOBEC3B	6th	0.0509158	E		SRR8326926	MCP-ADAR2 DD-NES - MS2 adRNA	Oncogenes	0.159912	G		SRR8096307	BE3-R33A	Essential genes	0.148341	I
																								SRR8908993	V82G	10th	0.113004	D		SRR11561309	BE4-PpAPOBEC1-R33A	6th	0.0493525	E		SRR8326926	MCP-ADAR2 DD-NES - MS2 adRNA	ClinVar	0.106661	G		SRR8096267	BE3-R33A	Oncogenes	0.17548	I
																								SRR8908982	K20A/R21A	10th	0.235285	D		SRR11561321	BE4-rAPOBEC1-K34A-H122A	6th	0.0558109	E		SRR8326926	MCP-ADAR2 DD-NES - MS2 adRNA	CDS	0.183717	G		SRR8096311	BE3-R33A	Oncogenes	0.132163	I
																								SRR8909020	V82G	10th	0.137688	D		SRR11561293	BE4-RrA3F	6th	0.046013	E		SRR8326927	MCP-ADAR2 DD-NES + MS2 adRNA	Essential genes	0.255288	G		SRR8096267	BE3-R33A	Oncogenes	0.17548	I
																								SRR8909011	ABEmax	4th	0.959738	D		SRR11561322	BE4-rAPOBEC1-K34A-H122A	6th	0.0557952	E		SRR8326927	MCP-ADAR2 DD-NES + MS2 adRNA	Oncogenes	0.246809	G		SRR8096303	BE3-R33A	Oncogenes	0.135763	I
																								SRR8909014	V82G	4th	0.13881	D		SRR11561298	BE4-rAPOBEC1	6th	0.721776	E		SRR8326927	MCP-ADAR2 DD-NES + MS2 adRNA	ClinVar	0.169856	G		SRR8096307	BE3-R33A	Oncogenes	0.147145	I
																								SRR8909007	K20A/R21A	4th	0.210949	D		SRR11561282	BE4-AmAPOBEC1	6th	0.0528327	E		SRR8326927	MCP-ADAR2 DD-NES + MS2 adRNA	CDS	0.285166	G		SRR8096311	BE3-R33A	Oncogenes	0.132163	I
																								SRR8909017	ABEmax	4th	0.969715	D		SRR11561318	BE4-rAPOBEC1-K34A-H122A	6th	0.0535702	E		SRR8326930	MCP-ADAR2 DD-NLS - MS2 adRNA	Essential genes	0.140023	G		SRR8096303	BE3-R33A	Oncogenes	0.135763	I
																								SRR8909001	miniABEmax	4th	1.24799	D		SRR11561289	nCas9	6th	0.0465536	E		SRR8326930	MCP-ADAR2 DD-NLS - MS2 adRNA	Oncogenes	0.140794	G		SRR8096307	BE3-R33A	Oncogenes	0.147145	I
																								SRR8909019	K20A/R21A	4th	0.239443	D		SRR11561325	nCas9	6th	0.0456085	E		SRR8326930	MCP-ADAR2 DD-NLS - MS2 adRNA	ClinVar	0.0680812	G		SRR8096267	BE3-R33A	ClinVar	0.201154	I
																								SRR8908977	K20A/R21A	4th	0.132788	D		SRR11561299	BE4-rAPOBEC1	6th	0.738277	E		SRR8326930	MCP-ADAR2 DD-NLS - MS2 adRNA	CDS	0.151107	G		SRR8096311	BE3-R33A	ClinVar	0.15607	I
																								SRR8909013	K20A/R21A	4th	0.228735	D		SRR11561302	BE4-PpAPOBEC1-H122A	6th	0.0728518	E		SRR8326931	MCP-ADAR2 DD-NLS + MS2 adRNA	Essential genes	0.1325	G		SRR8096303	BE3-R33A	ClinVar	0.162209	I
																								SRR8909015	GFP	4th	0.0539435	D		SRR11561314	nCas9	6th	0.0449252	E		SRR8326931	MCP-ADAR2 DD-NLS + MS2 adRNA	Oncogenes	0.129929	G		SRR8096307	BE3-R33A	ClinVar	0.179725	I
																								SRR8908983	V82G	4th	0.167179	D		SRR11561292	BE4-RrA3F	6th	0.0461566	E		SRR8326931	MCP-ADAR2 DD-NLS + MS2 adRNA	ClinVar	0.0808243	G		SRR8096267	BE3-R33A	CDS	0.176971	I
																								SRR8908987	K20A/R21A	4th	0.261544	D		SRR11561284	BE4-AmAPOBEC1	6th	0.0510208	E		SRR8326931	MCP-ADAR2 DD-NLS + MS2 adRNA	CDS	0.144143	G		SRR8096311	BE3-R33A	CDS	0.13677	I
																								SRR8908978	V82G	4th	0.123124	D		SRR11561315	BE4-PpAPOBEC1	6th	0.0692801	E		SRR8790780	ABE7.10	Essential genes	0.27599	H		SRR8096303	BE3-R33A	CDS	0.139406	I
																								SRR8909005	ABEmax	4th	0.994131	D		SRR11561290	BE4-RrA3F	6th	0.0457667	E		SRR8790774	ABE7.10	Essential genes	0.220858	H		SRR8096307	BE3-R33A	CDS	0.148341	I
																								SRR8908996	miniABEmax	4th	1.12494	D		SRR11561304	BE4-PpAPOBEC1-R33A	6th	0.048567	E		SRR8790775	ABE7.10	Essential genes	0.213655	H		SRR8096304	BE3-R33A/K34A	Essential genes	0.0445044	I
																								SRR8908980	ABEmax	4th	1.07265	D		SRR11561326	nCas9	6th	0.0460819	E		SRR8790780	ABE7.10	Oncogenes	0.254451	H		SRR8096308	BE3-R33A/K34A	Essential genes	0.0463135	I
																								SRR8909018	miniABEmax	4th	0.929598	D		SRR11561295	BE4-PpAPOBEC1-H122A	6th	0.0692354	E		SRR8790774	ABE7.10	Oncogenes	0.208075	H		SRR8096312	BE3-R33A/K34A	Essential genes	0.0417666	I
																								SRR8909006	miniABEmax	4th	1.03406	D		SRR11561297	BE4-rAPOBEC1	6th	0.721494	E		SRR8790775	ABE7.10	Oncogenes	0.203065	H		SRR8096269	BE3-R33A/K34A	Essential genes	0.0501789	I
																								SRR8909012	miniABEmax	4th	0.79015	D		SRR11561323	BE4-rAPOBEC1	6th	0.752737	E		SRR8790780	ABE7.10	ClinVar	0.320717	H		SRR8096304	BE3-R33A/K34A	Oncogenes	0.0418075	I
																								SRR8908988	V82G	4th	0.17022	D		SRR11561286	BE4-AmAPOBEC1	6th	0.0508654	E		SRR8790774	ABE7.10	ClinVar	0.249651	H		SRR8096308	BE3-R33A/K34A	Oncogenes	0.0455348	I
																								SRR8908985	ABEmax	4th	0.907837	D		SRR11561281	BE4-AmAPOBEC1	6th	0.0528908	E		SRR8790775	ABE7.10	ClinVar	0.233175	H		SRR8096312	BE3-R33A/K34A	Oncogenes	0.0388729	I
																								SRR8908992	K20A/R21A	4th	0.184599	D		SRR11561276	BE4-SsAPOBEC3B	6th	0.0510623	E		SRR8790780	ABE7.10	CDS	0.280503	H		SRR8096304	BE3-R33A/K34A	Oncogenes	0.0418075	I
																								SRR8908976	miniABEmax	4th	0.604591	D		SRR11561308	BE4-PpAPOBEC1-R33A	6th	0.0495898	E		SRR8790774	ABE7.10	CDS	0.230612	H		SRR8096308	BE3-R33A/K34A	Oncogenes	0.0455348	I
																								SRR8908981	miniABEmax	4th	1.16343	D		SRR11561305	BE4-PpAPOBEC1-R33A	6th	0.0486351	E		SRR8790775	ABE7.10	CDS	0.225336	H		SRR8096312	BE3-R33A/K34A	Oncogenes	0.0388729	I
																								SRR8908990	ABEmax	4th	0.674888	D		SRR11561307	BE4-PpAPOBEC1-R33A	6th	0.0482131	E		SRR8790743	ABE7.10(D53E)-site 1	Essential genes	0.215977	H		SRR8096269	BE3-R33A/K34A	Oncogenes	0.0491713	I
																								SRR8909009	GFP	4th	0.047713	D		SRR11561294	BE4-PpAPOBEC1-H122A	6th	0.0684409	E		SRR8790744	ABE7.10(D53E)-site 1	Essential genes	0.174077	H		SRR8096269	BE3-R33A/K34A	Oncogenes	0.0491713	I
																								SRR8910104	GFP	4th	0.0560783	D		SRR11561301	BE4-PpAPOBEC1-H122A	6th	0.0727277	E		SRR8790742	ABE7.10(D53E)-site 1	Essential genes	0.206597	H		SRR8096304	BE3-R33A/K34A	ClinVar	0.0391355	I
																								SRR8909008	V82G	4th	0.128195	D		SRR11561320	BE4-rAPOBEC1-K34A-H122A	6th	0.054101	E		SRR8790743	ABE7.10(D53E)-site 1	Oncogenes	0.203344	H		SRR8096308	BE3-R33A/K34A	ClinVar	0.040381	I
																								SRR8908998	V82G	4th	0.134925	D		SRR11561279	BE4-SsAPOBEC3B	6th	0.0513367	E		SRR8790744	ABE7.10(D53E)-site 1	Oncogenes	0.166493	H		SRR8096312	BE3-R33A/K34A	ClinVar	0.0383988	I
																								SRR8909000	ABEmax	4th	1.08471	D		SRR11561287	BE4-RrA3F	6th	0.0469917	E		SRR8790742	ABE7.10(D53E)-site 1	Oncogenes	0.198809	H		SRR8096269	BE3-R33A/K34A	ClinVar	0.0566224	I
																								SRR8909021	GFP	4th	0.0501289	D		SRR11561319	BE4-rAPOBEC1-K34A-H122A	6th	0.0543253	E		SRR8790743	ABE7.10(D53E)-site 1	ClinVar	0.221802	H		SRR8096304	BE3-R33A/K34A	CDS	0.0445044	I
																								SRR8908986	miniABEmax	4th	1.06278	D		SRR11561317	BE4-rAPOBEC1-K34A-H122A	6th	0.0532581	E		SRR8790744	ABE7.10(D53E)-site 1	ClinVar	0.1757	H		SRR8096308	BE3-R33A/K34A	CDS	0.0463135	I
																								SRR8908975	ABEmax	4th	0.673729	D		SRR11561274	BE4-SsAPOBEC3B	6th	0.0526836	E		SRR8790742	ABE7.10(D53E)-site 1	ClinVar	0.237654	H		SRR8096312	BE3-R33A/K34A	CDS	0.0417666	I
																								SRR8908995	ABEmax	4th	1.00377	D		SRR11561306	BE4-PpAPOBEC1-R33A	6th	0.0480616	E		SRR8790743	ABE7.10(D53E)-site 1	CDS	0.230149	H		SRR8096269	BE3-R33A/K34A	CDS	0.0501789	I
																								SRR8908997	K20A/R21A	4th	0.256222	D		SRR11561312	BE4-PpAPOBEC1	6th	0.0700288	E		SRR8790744	ABE7.10(D53E)-site 1	CDS	0.181832	H		SRR8832240	GFP	Essential genes	0.0327211	I
																								SRR8909003	V82G	4th	0.141525	D		SRR11561311	BE4-PpAPOBEC1	6th	0.0712845	E		SRR8790742	ABE7.10(D53E)-site 1	CDS	0.221996	H		SRR8832240	GFP	Oncogenes	0.0304762	I
																								SRR8908991	miniABEmax	4th	0.674748	D		SRR11561310	BE4-PpAPOBEC1	6th	0.0713513	E		SRR8790738	ABE7.10(F148A)-site 1	Essential genes	0.0404285	H		SRR8832240	GFP	Oncogenes	0.0304762	I
																								SRR8909002	K20A/R21A	4th	0.272611	D		SRR11561300	BE4-PpAPOBEC1-H122A	6th	0.0591479	E		SRR8790739	ABE7.10(F148A)-site 1	Essential genes	0.0402037	H		SRR8832240	GFP	ClinVar	0.0232451	I
																								SRR8908993	V82G	4th	0.123824	D		SRR11561316	BE4-PpAPOBEC1	6th	0.0696439	E		SRR8790745	ABE7.10(F148A)-site 1	Essential genes	0.0362322	H
																								SRR8908982	K20A/R21A	4th	0.256934	D		SRR11561296	BE4-PpAPOBEC1-H122A	6th	0.0586595	E		SRR8790738	ABE7.10(F148A)-site 1	Oncogenes	0.0393501	H
																								SRR8909020	V82G	4th	0.150268	D		SRR11561288	BE4-RrA3F	6th	0.0470185	E		SRR8790739	ABE7.10(F148A)-site 1	Oncogenes	0.0404251	H
																								SRR8909017	ABEmax	5th	0.912715	D		SRR11561277	BE4-SsAPOBEC3B	6th	0.0507392	E		SRR8790745	ABE7.10(F148A)-site 1	Oncogenes	0.0361354	H
																								SRR8909014	V82G	5th	0.133724	D		SRR11561324	BE4-rAPOBEC1	6th	0.753539	E		SRR8790738	ABE7.10(F148A)-site 1	ClinVar	0.0363693	H
																								SRR8909007	K20A/R21A	5th	0.199005	D		SRR11561313	BE4-PpAPOBEC1	6th	0.0698738	E		SRR8790739	ABE7.10(F148A)-site 1	ClinVar	0.0342118	H
																								SRR8909011	ABEmax	5th	0.901437	D		SRR11561291	BE4-RrA3F	7th	0.0381673	E		SRR8790745	ABE7.10(F148A)-site 1	ClinVar	0.0313781	H
																								SRR8909001	miniABEmax	5th	1.18429	D		SRR11561283	BE4-AmAPOBEC1	7th	0.0440457	E		SRR8790738	ABE7.10(F148A)-site 1	CDS	0.0409959	H
																								SRR8909019	K20A/R21A	5th	0.227432	D		SRR11561285	BE4-AmAPOBEC1	7th	0.0434893	E		SRR8790739	ABE7.10(F148A)-site 1	CDS	0.040739	H
																								SRR8908977	K20A/R21A	5th	0.123061	D		SRR11561280	BE4-SsAPOBEC3B	7th	0.0430157	E		SRR8790745	ABE7.10(F148A)-site 1	CDS	0.0365655	H
																								SRR8909013	K20A/R21A	5th	0.213617	D		SRR11561303	nCas9	7th	0.0375211	E		SRR9027783	ABE7.10(F148A)-site 2	Essential genes	0.0706057	H
																								SRR8909015	GFP	5th	0.0473607	D		SRR11561293	BE4-RrA3F	7th	0.0381326	E		SRR9027787	ABE7.10(F148A)-site 2	Essential genes	0.0736036	H
																								SRR8908987	K20A/R21A	5th	0.245938	D		SRR11561309	BE4-PpAPOBEC1-R33A	7th	0.0413458	E		SRR9027788	ABE7.10(F148A)-site 2	Essential genes	0.0668552	H
																								SRR8908983	V82G	5th	0.161854	D		SRR11561321	BE4-rAPOBEC1-K34A-H122A	7th	0.0476393	E		SRR9027783	ABE7.10(F148A)-site 2	Oncogenes	0.0690555	H
																								SRR8908978	V82G	5th	0.116457	D		SRR11561298	BE4-rAPOBEC1	7th	0.714871	E		SRR9027787	ABE7.10(F148A)-site 2	Oncogenes	0.0712021	H
																								SRR8909005	ABEmax	5th	0.937573	D		SRR11561322	BE4-rAPOBEC1-K34A-H122A	7th	0.0478607	E		SRR9027788	ABE7.10(F148A)-site 2	Oncogenes	0.0655773	H
																								SRR8908996	miniABEmax	5th	1.07335	D		SRR11561282	BE4-AmAPOBEC1	7th	0.0440188	E		SRR9027783	ABE7.10(F148A)-site 2	ClinVar	0.0645789	H
																								SRR8908980	ABEmax	5th	1.00495	D		SRR11561318	BE4-rAPOBEC1-K34A-H122A	7th	0.0451058	E		SRR9027787	ABE7.10(F148A)-site 2	ClinVar	0.0763511	H
																								SRR8909018	miniABEmax	5th	0.88825	D		SRR11561289	nCas9	7th	0.0376063	E		SRR9027788	ABE7.10(F148A)-site 2	ClinVar	0.0530295	H
																								SRR8909006	miniABEmax	5th	0.988249	D		SRR11561325	nCas9	7th	0.0377174	E		SRR9027783	ABE7.10(F148A)-site 2	CDS	0.0732254	H
																								SRR8909012	miniABEmax	5th	0.751539	D		SRR11561299	BE4-rAPOBEC1	7th	0.72668	E		SRR9027787	ABE7.10(F148A)-site 2	CDS	0.0769035	H
																								SRR8908988	V82G	5th	0.162109	D		SRR11561302	BE4-PpAPOBEC1-H122A	7th	0.0686047	E		SRR9027788	ABE7.10(F148A)-site 2	CDS	0.0689146	H
																								SRR8908985	ABEmax	5th	0.843064	D		SRR11561314	nCas9	7th	0.0370903	E		SRR8790763	ABE7.10-site 1	Essential genes	0.219853	H
																								SRR8908992	K20A/R21A	5th	0.171003	D		SRR11561292	BE4-RrA3F	7th	0.0383738	E		SRR8790762	ABE7.10-site 1	Essential genes	0.224335	H
																								SRR8908976	miniABEmax	5th	0.567865	D		SRR11561284	BE4-AmAPOBEC1	7th	0.044262	E		SRR8790764	ABE7.10-site 1	Essential genes	0.22991	H
																								SRR8908990	ABEmax	5th	0.627521	D		SRR11561315	BE4-PpAPOBEC1	7th	0.0633702	E		SRR8790763	ABE7.10-site 1	Oncogenes	0.202369	H
																								SRR8908981	miniABEmax	5th	1.10623	D		SRR11561290	BE4-RrA3F	7th	0.0381274	E		SRR8790762	ABE7.10-site 1	Oncogenes	0.208252	H
																								SRR8909009	GFP	5th	0.041629	D		SRR11561304	BE4-PpAPOBEC1-R33A	7th	0.0414602	E		SRR8790764	ABE7.10-site 1	Oncogenes	0.214964	H
																								SRR8910104	GFP	5th	0.0442232	D		SRR11561326	nCas9	7th	0.0377256	E		SRR8790763	ABE7.10-site 1	ClinVar	0.251487	H
																								SRR8909008	V82G	5th	0.123602	D		SRR11561295	BE4-PpAPOBEC1-H122A	7th	0.0653844	E		SRR8790762	ABE7.10-site 1	ClinVar	0.221564	H
																								SRR8908998	V82G	5th	0.131287	D		SRR11561281	BE4-AmAPOBEC1	7th	0.0443953	E		SRR8790764	ABE7.10-site 1	ClinVar	0.265658	H
																								SRR8909000	ABEmax	5th	1.01189	D		SRR11561297	BE4-rAPOBEC1	7th	0.715796	E		SRR8790763	ABE7.10-site 1	CDS	0.235302	H
																								SRR8909021	GFP	5th	0.0447401	D		SRR11561308	BE4-PpAPOBEC1-R33A	7th	0.0410302	E		SRR8790762	ABE7.10-site 1	CDS	0.240571	H
																								SRR8908986	miniABEmax	5th	0.996779	D		SRR11561276	BE4-SsAPOBEC3B	7th	0.043138	E		SRR8790764	ABE7.10-site 1	CDS	0.238618	H
																								SRR8908975	ABEmax	5th	0.625761	D		SRR11561286	BE4-AmAPOBEC1	7th	0.0435289	E		SRR8790767	ABE7.10-site 2	Essential genes	0.304303	H
																								SRR8908995	ABEmax	5th	0.948288	D		SRR11561323	BE4-rAPOBEC1	7th	0.743113	E		SRR8790765	ABE7.10-site 2	Essential genes	0.316844	H
																								SRR8908997	K20A/R21A	5th	0.242934	D		SRR11561305	BE4-PpAPOBEC1-R33A	7th	0.0412896	E		SRR8790766	ABE7.10-site 2	Essential genes	0.323945	H
																								SRR8908991	miniABEmax	5th	0.636132	D		SRR11561307	BE4-PpAPOBEC1-R33A	7th	0.0412468	E		SRR8790767	ABE7.10-site 2	Oncogenes	0.284089	H
																								SRR8909003	V82G	5th	0.134716	D		SRR11561294	BE4-PpAPOBEC1-H122A	7th	0.0645319	E		SRR8790765	ABE7.10-site 2	Oncogenes	0.289976	H
																								SRR8909002	K20A/R21A	5th	0.255445	D		SRR11561301	BE4-PpAPOBEC1-H122A	7th	0.0685737	E		SRR8790766	ABE7.10-site 2	Oncogenes	0.297143	H
																								SRR8908982	K20A/R21A	5th	0.241977	D		SRR11561320	BE4-rAPOBEC1-K34A-H122A	7th	0.046823	E		SRR8790767	ABE7.10-site 2	ClinVar	0.331431	H
																								SRR8908993	V82G	5th	0.118689	D		SRR11561279	BE4-SsAPOBEC3B	7th	0.0433198	E		SRR8790765	ABE7.10-site 2	ClinVar	0.306115	H
																								SRR8909020	V82G	5th	0.143891	D		SRR11561274	BE4-SsAPOBEC3B	7th	0.0435404	E		SRR8790766	ABE7.10-site 2	ClinVar	0.310983	H
																								SRR8909011	ABEmax	6th	0.921707	D		SRR11561287	BE4-RrA3F	7th	0.038361	E		SRR8790767	ABE7.10-site 2	CDS	0.316057	H
																								SRR8909014	V82G	6th	0.138335	D		SRR11561317	BE4-rAPOBEC1-K34A-H122A	7th	0.0449708	E		SRR8790765	ABE7.10-site 2	CDS	0.328439	H
																								SRR8909007	K20A/R21A	6th	0.202421	D		SRR11561319	BE4-rAPOBEC1-K34A-H122A	7th	0.0468523	E		SRR8790766	ABE7.10-site 2	CDS	0.335752	H
																								SRR8909001	miniABEmax	6th	1.19528	D		SRR11561306	BE4-PpAPOBEC1-R33A	7th	0.0413264	E		SRR8790757	GFP	Essential genes	0.0183556	H
																								SRR8909017	ABEmax	6th	0.92732	D		SRR11561312	BE4-PpAPOBEC1	7th	0.0646671	E		SRR8790756	GFP	Essential genes	0.0183513	H
																								SRR8909019	K20A/R21A	6th	0.230708	D		SRR11561311	BE4-PpAPOBEC1	7th	0.0651507	E		SRR8790777	GFP	Essential genes	0.0195382	H
																								SRR8908977	K20A/R21A	6th	0.127331	D		SRR11561310	BE4-PpAPOBEC1	7th	0.0654885	E		SRR8790776	GFP	Essential genes	0.0193284	H
																								SRR8909013	K20A/R21A	6th	0.218684	D		SRR11561300	BE4-PpAPOBEC1-H122A	7th	0.0528645	E		SRR8790773	GFP	Essential genes	0.0192393	H
																								SRR8909015	GFP	6th	0.0508666	D		SRR11561316	BE4-PpAPOBEC1	7th	0.0637055	E		SRR8790772	GFP	Essential genes	0.0186278	H
																								SRR8908987	K20A/R21A	6th	0.251334	D		SRR11561296	BE4-PpAPOBEC1-H122A	7th	0.052711	E		SRR8790757	GFP	Oncogenes	0.021333	H
																								SRR8908983	V82G	6th	0.167444	D		SRR11561288	BE4-RrA3F	7th	0.0382732	E		SRR8790756	GFP	Oncogenes	0.0209374	H
																								SRR8908978	V82G	6th	0.121973	D		SRR11561277	BE4-SsAPOBEC3B	7th	0.042825	E		SRR8790777	GFP	Oncogenes	0.0220318	H
																								SRR8909005	ABEmax	6th	0.95217	D		SRR11561324	BE4-rAPOBEC1	7th	0.741661	E		SRR8790776	GFP	Oncogenes	0.0228775	H
																								SRR8908996	miniABEmax	6th	1.0868	D		SRR11561313	BE4-PpAPOBEC1	7th	0.0648274	E		SRR8790773	GFP	Oncogenes	0.0225058	H
																								SRR8908980	ABEmax	6th	1.02599	D		SRR11561303	nCas9	8th	0.0425412	E		SRR8790772	GFP	Oncogenes	0.0217325	H
																								SRR8909018	miniABEmax	6th	0.894093	D		SRR11561280	BE4-SsAPOBEC3B	8th	0.0482061	E		SRR8790757	GFP	ClinVar	0.00863563	H
																								SRR8909006	miniABEmax	6th	0.994591	D		SRR11561285	BE4-AmAPOBEC1	8th	0.0479795	E		SRR8790756	GFP	ClinVar	0.0039096	H
																								SRR8909012	miniABEmax	6th	0.757833	D		SRR11561283	BE4-AmAPOBEC1	8th	0.049347	E		SRR8790777	GFP	ClinVar	0.0164314	H
																								SRR8908985	ABEmax	6th	0.866958	D		SRR11561309	BE4-PpAPOBEC1-R33A	8th	0.0468665	E		SRR8790776	GFP	ClinVar	0.0151385	H
																								SRR8908988	V82G	6th	0.168624	D		SRR11561291	BE4-RrA3F	8th	0.04445	E		SRR8790773	GFP	ClinVar	0.00873671	H
																								SRR8908976	miniABEmax	6th	0.57789	D		SRR11561321	BE4-rAPOBEC1-K34A-H122A	8th	0.0517114	E		SRR8790772	GFP	ClinVar	0.00677071	H
																								SRR8908992	K20A/R21A	6th	0.175049	D		SRR11561298	BE4-rAPOBEC1	8th	0.713278	E		SRR8790757	GFP	CDS	0.0189775	H
																								SRR8908981	miniABEmax	6th	1.12498	D		SRR11561293	BE4-RrA3F	8th	0.0430846	E		SRR8790756	GFP	CDS	0.0189126	H
																								SRR8909009	GFP	6th	0.0435796	D		SRR11561322	BE4-rAPOBEC1-K34A-H122A	8th	0.0515302	E		SRR8790777	GFP	CDS	0.0199183	H
																								SRR8908990	ABEmax	6th	0.639192	D		SRR11561282	BE4-AmAPOBEC1	8th	0.0481241	E		SRR8790776	GFP	CDS	0.0200687	H
																								SRR8910104	GFP	6th	0.0535718	D		SRR11561289	nCas9	8th	0.0426881	E		SRR8790773	GFP	CDS	0.0200176	H
																								SRR8909008	V82G	6th	0.127952	D		SRR11561318	BE4-rAPOBEC1-K34A-H122A	8th	0.0492796	E		SRR8790772	GFP	CDS	0.0193369	H
																								SRR8908998	V82G	6th	0.136131	D		SRR11561299	BE4-rAPOBEC1	8th	0.722553	E		SRR8790750	TadA-TadA*	Essential genes	0.411833	H
																								SRR8909000	ABEmax	6th	1.03607	D		SRR11561302	BE4-PpAPOBEC1-H122A	8th	0.0714649	E		SRR8790753	TadA-TadA*	Essential genes	0.372987	H
																								SRR8909021	GFP	6th	0.0447475	D		SRR11561325	nCas9	8th	0.0427222	E		SRR8790751	TadA-TadA*	Essential genes	0.411223	H
																								SRR8908986	miniABEmax	6th	1.02057	D		SRR11561292	BE4-RrA3F	8th	0.0431723	E		SRR8790750	TadA-TadA*	Oncogenes	0.443491	H
																								SRR8908975	ABEmax	6th	0.639945	D		SRR11561314	nCas9	8th	0.0422	E		SRR8790753	TadA-TadA*	Oncogenes	0.397729	H
																								SRR8908995	ABEmax	6th	0.965118	D		SRR11561284	BE4-AmAPOBEC1	8th	0.0494243	E		SRR8790751	TadA-TadA*	Oncogenes	0.443533	H
																								SRR8908997	K20A/R21A	6th	0.248213	D		SRR11561315	BE4-PpAPOBEC1	8th	0.067756	E		SRR8790750	TadA-TadA*	ClinVar	0.437448	H
																								SRR8908991	miniABEmax	6th	0.643598	D		SRR11561304	BE4-PpAPOBEC1-R33A	8th	0.0471909	E		SRR8790753	TadA-TadA*	ClinVar	0.399576	H
																								SRR8909002	K20A/R21A	6th	0.260504	D		SRR11561295	BE4-PpAPOBEC1-H122A	8th	0.0692956	E		SRR8790751	TadA-TadA*	ClinVar	0.454347	H
																								SRR8909003	V82G	6th	0.140939	D		SRR11561326	nCas9	8th	0.0425383	E		SRR8790750	TadA-TadA*	CDS	0.434643	H
																								SRR8908993	V82G	6th	0.122766	D		SRR11561290	BE4-RrA3F	8th	0.0445142	E		SRR8790753	TadA-TadA*	CDS	0.390418	H
																								SRR8908982	K20A/R21A	6th	0.246436	D		SRR11561281	BE4-AmAPOBEC1	8th	0.0484081	E		SRR8790751	TadA-TadA*	CDS	0.430782	H
																								SRR8909020	V82G	6th	0.148972	D		SRR11561323	BE4-rAPOBEC1	8th	0.737333	E
[truncated: 575 more rows]

[truncated: 1 more sheets: Supp. table 11]
